# Supplementary material for: Integration of ChIP-seq and machine learning reveals enhancers and a predictive regulatory sequence vocabulary in melanocytes
Source: HighWire-hosted journal article supplement (doi:10.1101/gr.139360.112), 2012-09-27
Supplement: SuppLegends.docx [file SuppLegends.docx]

**Figure S1. Distance between H3K4me1 peaks at previously characterized melanocyte enhancers.** UCSC genome browser displays (NCBI37/mm9). Intervals shown are A) chr7:94,654,896-94,657,898 for *Tyr* DRE-15kb, B) chr15:79,022,508-79,027,668 for *Sox10* MCS4, C) chr15:79,030,800-79,033,810 for *Sox10* MCS5, D) chr15:79,039,840-79,046,232 for *Sox10* MCS7, and E) chr15:79,052,275-79,055,119 for *Sox10* MCS9.

**Figure S2. Putative melanocyte enhancers at *Mitf, Tyrp1, Kit, and Mc1r*.** A-D) UCSC genome browser displays (NCBI37/mm9). Intervals shown are A) chr6:97,920,591-98,007,614 (*Mitf*), B) chr4:80,466,625-80,508,742 (*Tyrp1*), C) chr5:75,851,696-76,074,948 (*Kit*), and D) chr8:125,928,684-125,935,393 (*Mc1r*).

**Figure S3. EP300 peaks at promoters of melanocyte genes are not flanked by H3K4me1 enrichment.** UCSC genome browser displays (NCBI37/mm9). Intervals shown are A) chr4:80,478,313-80,497,692 (*Tyrp1*), B) chr6:97,939,711-97,972,197 (*Mitf*), C) chr14:118,410,897-118,454,305 (*Dct*), D) chr19:29,771,179-29,783,144 (*Mlana*). Enlarged regions to the right (boxed with dashed border) are: A) chr4:80,478,352-80,482,629 (*Tyrp1*), B) chr6:97,940,235-97,943,908 (*Mitf*), C) chr14:118,447,655-118,454,305 (*Dct*), D) chr19:29,771,214-29,773,746 (*Mlana*). Note H3K4me1 ChIP-seq signal on one side (TSS-upstream) of EP300 peaks overlapping TSS, but not the other (TSS-downstream).

**Figure S4. Results of luciferase reporter assay for 10 negative regions and 11 kmer-SVM predictions in melan-a.** A) Fold increase in luciferase reporter expression of indicated test sequences relative to promoter-only control (P; white bar). Orange bars show fold increase directed by negative regions (numbered 1-10). Error bars show standard deviation of 3 biological replicates. Dotted line shows 3-fold threshold. B) Fold increase in luciferase reporter expression of indicated test sequences relative to promoter-only control (P; white bar). Green bars show fold increase directed by three previously characterized melanocyte enhancers (see Table S1). Error bars show standard deviation of 3 biological replicates.

**Figure S5. Reporter expression in transgenic zebrafish is mostly specific to melanocytes.** Full-body dorsal images of transgenic embryos (rectangular images on the left), and enlarged melanocytes (square images on the right), at 3 dpf. Embryos have been raised in PTU to prevent pigmentation. Numbers correspond to putative enhancers in Figures 4 and 5. All images are of mosaic (G0) embryos, leading to GFP expression in only small subset of melanocytes in positive embryos. White arrowheads point to individual GFP-positive melanocytes which are enlarged to the right of the corresponding full-body images. In (C) a second GFP+ melanocyte is enlarged in the inset at the bottom left of the full-body image. Diffuse fluorescence in the midsection of all embryos is non-specific background fluorescence from the yolk, seen commonly in transgenic zebrafish embryos.

**Figure S6. 10 most highly-predictive 6-mers.** A) 6-mers with highest positive predictive value to kmer-SVM classifier, factors predicted to bind them, and logos for corresponding PWMs in public databases. *No PWM in queried databases. Match based on similarity to published binding specificities (see methods).

**Figure S7. ChIP-seq enrichment at training set and predictions.** Average number ChIP-seq reads per region for H3K4me1 (left) and EP300 (right) at regions in kmer-SVM training set (darker color) and kmer-SVM predictions (lighter color).

**Figure S8. Functional validation of kmer-SVM predicted enhancers.** A) Fold increase in luciferase reporter expression directed by indicated test sequence relative to promoter-only control (P; white bar). Grey bars show fold increase directed by kmer-SVM predicted enhancers (numbered 1-11). N (orange bar) represents the average of 10 negative regions. Error bars show standard deviation of 3 replicates (except in the case of N where error bars show the standard deviation of 10 negative regions). Dotted lines show 10-fold and 3-fold thresholds (top to bottom). B&C) Representative images showing GFP-positive melanocytes of transgenic (mosaic) zebrafish embryos at 3 dpf. GFP expression is directed by kmer-SVM predicted enhancer #1 in B, and by predicted enhancer #8 in C. Four different embryos are shown for each reporter construct. Numbering corresponds to panel A, as well as Tables S2 and S3.
