# Supplementary material for: Integration of ChIP-seq and machine learning reveals enhancers and a predictive regulatory sequence vocabulary in melanocytes
Source: HighWire-hosted journal article supplement (doi:10.1101/gr.139360.112), 2012-09-27
Supplement: Supplemental_Tables_S4-S10.xlsx [file Supplemental_Tables_S4-S10.xlsx]

## Sheet: Summary
Table	Sheet	Description
S4	EP300 Peaks	mm9 Peak coordinates generated MACS. Ranked by fold_enrichment - also generated by MACS. Replicated peaks only.(n=3,622)
S5	H3K4me1 Peaks	mm9 Peaks coordinates and ranks generated by cisGenome. (n=59,923)
S6	H3K4me1-flanked regions	Regions at which two adjacent H3K4me1 peaks are seperated by 100-1500 bp. (n=21,189; mm9)
S7	Putative Enhancer	EP300 peaks that overlap H3K4me1-flanked regions. Ranked by EP300 peak fold_enrichment. (n=2,489; mm9)
S8	kmer-SVM predictions mm9	Enhancers predicted by kmer-SVM classifier in mouse genome. (n=7,361)
S9	kmer-SVM predictions hg19	Enhancers predicted by kmer-SVM classifier in human genome. (n=7,788)
S10	Predictive 6-mers	Vocabulary of weighted 6-mers derived by the SVM

## Sheet: S4. EP300 Peaks
chr	start	end	summit	rank
chr1	10560710	10561950	10561438	500
chr1	10762121	10763306	10762743	96
chr1	10767683	10768763	10768240	199
chr1	10783821	10784919	10784337	2096
chr1	13521259	13522601	13521866	3368
chr1	13650441	13651244	13650920	2484
chr1	13742334	13743292	13742745	3103
chr1	14000488	14001364	14000972	1667
chr1	14263297	14264742	14264238	1335
chr1	14281008	14283286	14282799	1623
chr1	14294270	14295659	14294838	1162
chr1	14296107	14297173	14296650	924
chr1	14553014	14554060	14553479	405
chr1	20292273	20293871	20293182	140
chr1	20809801	20810896	20810355	487
chr1	23209284	23210376	23209804	713
chr1	23277428	23278993	23278508	1391
chr1	28788864	28790513	28789924	2428
chr1	33954871	33955718	33955231	2785
chr1	36687866	36689064	36688418	1075
chr1	36702577	36703953	36703194	330
chr1	38011569	38012327	38011872	1392
chr1	38451658	38452527	38452059	1947
chr1	38458234	38459533	38458912	197
chr1	38483319	38484489	38483991	1178
chr1	38663706	38666278	38665207	1513
chr1	39612652	39613669	39613089	3601
chr1	39752661	39753255	39753074	2842
chr1	39754772	39756021	39755521	366
chr1	39788195	39789560	39788616	1910
chr1	39814845	39815800	39815335	1069
chr1	39815878	39816808	39816179	2216
chr1	43184275	43185385	43185191	3608
chr1	43414688	43415673	43415132	2843
chr1	43540078	43541194	43540254	2485
chr1	43672338	43673537	43672991	194
chr1	43771586	43772219	43771947	2313
chr1	44632514	44633400	44633025	2054
chr1	44641330	44642764	44642058	126
chr1	44648192	44649636	44648853	200
chr1	44841975	44842979	44842475	1281
chr1	45561237	45562214	45561516	2808
chr1	51146744	51148063	51147482	729
chr1	51202340	51202987	51202655	3394
chr1	51565799	51567192	51566229	858
chr1	51586241	51587258	51586664	3618
chr1	51587756	51588942	51588407	3416
chr1	51845965	51847101	51846553	3212
chr1	51878498	51879399	51878989	3395
chr1	52652072	52653039	52652628	2437
chr1	57115866	57116800	57116228	442
chr1	57152719	57153738	57153239	878
chr1	58342342	58343355	58342722	1948
chr1	58539411	58540159	58539647	3253
chr1	58782346	58783031	58782842	2627
chr1	59007783	59008752	59008248	3298
chr1	59344400	59345097	59344901	2082
chr1	59354987	59355945	59355427	1439
chr1	59505838	59507092	59506509	118
chr1	60724369	60725692	60725339	1609
chr1	60826799	60828093	60827024	3196
chr1	60828124	60828605	60828319	2764
chr1	60874352	60875774	60875141	861
chr1	60881140	60881931	60881519	2942
chr1	60882227	60883259	60882826	282
chr1	60907432	60908836	60908333	2035
chr1	62759089	62760242	62759808	2229
chr1	62776048	62777069	62776553	2892
chr1	62785201	62785985	62785494	1254
chr1	62789653	62791381	62790270	33
chr1	62947637	62948830	62948150	946
chr1	63022925	63023717	63023411	1938
chr1	63755096	63756121	63755588	1920
chr1	63823408	63824219	63823694	1765
chr1	64066982	64068040	64067508	1514
chr1	64147739	64148650	64148197	2314
chr1	67443988	67445106	67444633	3396
chr1	67599661	67600491	67600091	2861
chr1	70113957	70114665	70114230	3065
chr1	70119586	70120822	70120208	1720
chr1	70124850	70126088	70125490	1939
chr1	71853409	71854886	71854346	3254
chr1	71926760	71927651	71927251	1487
chr1	71939572	71940535	71939954	2266
chr1	71955981	71957040	71956568	1108
chr1	71963595	71964310	71963853	447
chr1	72355941	72357423	72356574	2187
chr1	72460900	72461853	72461438	263
chr1	72474858	72476412	72475192	488
chr1	74341926	74342851	74342401	3112
chr1	75689106	75690316	75689642	478
chr1	78009733	78010632	78010261	1581
chr1	78053977	78055337	78054668	90
chr1	78055877	78058389	78057643	207
chr1	78065423	78066894	78066026	304
chr1	78159253	78160813	78160340	3091
chr1	78185432	78186525	78185958	406
chr1	78392184	78392935	78392582	2486
chr1	78458966	78459969	78459378	3593
chr1	79577681	79578891	79578359	1493
chr1	79734567	79735930	79735401	337
chr1	79774191	79775506	79774824	176
chr1	81734452	81735937	81735142	246
chr1	81742027	81743099	81742719	3418
chr1	81909497	81910882	81910239	351
chr1	81958553	81959585	81959083	991
chr1	81963462	81964922	81963714	1640
chr1	81973196	81974461	81973822	1243
chr1	82004684	82005912	82005329	2254
chr1	82041992	82043399	82042866	1874
chr1	82106222	82107525	82107016	3337
chr1	82151869	82153313	82152799	1659
chr1	82355414	82356345	82355881	1668
chr1	82472805	82474030	82473549	169
chr1	82830991	82831855	82831507	1949
chr1	82915604	82916632	82916112	1785
chr1	82956154	82957036	82956590	1669
chr1	82957946	82958474	82958202	1844
chr1	84851041	84853034	84852595	3397
chr1	84853831	84854999	84854402	1058
chr1	88424305	88425116	88424679	3168
chr1	88894115	88895394	88894855	208
chr1	88899360	88900798	88900055	2943
chr1	90736338	90737367	90736959	1610
chr1	91004661	91005559	91005031	2112
chr1	91026500	91027635	91027146	264
chr1	92175464	92176270	92175822	835
chr1	92731051	92731995	92731443	3222
chr1	92806215	92807014	92806624	2113
chr1	92813793	92815322	92814951	34
chr1	92867052	92868495	92868074	1611
chr1	92869418	92870448	92869969	2944
chr1	92871088	92872248	92871719	1062
chr1	92919877	92921343	92920762	421
chr1	92952047	92953628	92952569	2679
chr1	93196009	93196778	93196443	2680
chr1	93209562	93210302	93209952	1639
chr1	93852612	93853931	93853477	1182
chr1	93931844	93933372	93932586	61
chr1	93983240	93984129	93983643	1899
chr1	94026781	94027633	94027187	2217
chr1	94640977	94642080	94641537	605
chr1	94651294	94652469	94652082	1083
chr1	94670782	94671657	94671152	2654
chr1	94683664	94684317	94683954	3113
chr1	95080551	95081286	95081007	2945
chr1	95445444	95446434	95446133	3607
chr1	95463451	95464308	95463719	1393
chr1	96770278	96771212	96770779	2210
chr1	108051553	108052560	108051989	1599
chr1	108133409	108134208	108133739	1670
chr1	108199677	108200554	108200147	1950
chr1	108297114	108297930	108297629	898
chr1	108525816	108527218	108526843	595
chr1	108596900	108597916	108597284	870
chr1	112954397	112955556	112955095	2740
chr1	116570521	116571116	116570926	3015
chr1	118004123	118005902	118004616	827
chr1	121805697	121806814	121806485	2315
chr1	122011826	122013163	122012492	653
chr1	122132706	122133650	122133260	768
chr1	122253836	122254714	122254197	1900
chr1	123211255	123212288	123211674	1660
chr1	124253546	124254374	124253794	2246
chr1	125481154	125481983	125481653	2487
chr1	127324559	127325639	127325114	654
chr1	127404248	127405135	127404575	180
chr1	129124390	129125362	129125075	195
chr1	129470017	129471022	129470618	2488
chr1	133838759	133839889	133839317	1603
chr1	134271589	134272741	134272166	1147
chr1	134303973	134304928	134304651	1766
chr1	134315655	134317002	134316376	266
chr1	135026247	135027255	135026855	3492
chr1	135776892	135778012	135777453	982
chr1	135937986	135939015	135938257	2012
chr1	136798504	136799408	136799017	1515
chr1	136910861	136912498	136911947	248
chr1	136913085	136914210	136913687	564
chr1	137380091	137381096	137380697	3166
chr1	137521840	137523201	137522537	2741
chr1	137555706	137556790	137556236	866
chr1	137560111	137561246	137560657	557
chr1	137561710	137562616	137562223	1344
chr1	137625572	137626336	137626156	2862
chr1	137628338	137629105	137628842	2402
chr1	137673267	137674303	137673840	3468
chr1	137676961	137678394	137677903	992
chr1	137679262	137679744	137679582	3016
chr1	137748583	137749711	137749135	2086
chr1	137935428	137936125	137935876	1183
chr1	138579306	138580442	138579838	1572
chr1	141031934	141032568	141032376	3223
chr1	141048594	141049585	141049136	1895
chr1	152796231	152797914	152797405	2097
chr1	152913359	152914079	152913670	961
chr1	153189451	153191311	153190124	2800
chr1	153522623	153523546	153523123	1732
chr1	153629842	153631410	153630838	252
chr1	153719794	153720784	153720243	769
chr1	153725250	153726102	153725769	2976
chr1	153737016	153737963	153737444	1643
chr1	154102176	154103338	154102801	2438
chr1	154516619	154517634	154517205	2999
chr1	154639559	154640721	154640146	596
chr1	155111913	155113004	155112422	1671
chr1	155411486	155412525	155412053	536
chr1	155412627	155413523	155413064	2168
chr1	155419005	155420734	155419962	1672
chr1	155809151	155810152	155809601	625
chr1	155843975	155845001	155844479	1673
chr1	163885441	163886089	163885900	3510
chr1	165128058	165128732	165128326	2489
chr1	165321143	165322140	165321619	770
chr1	167362047	167363667	167363150	3369
chr1	167517657	167518624	167518068	227
chr1	167540275	167541516	167540894	232
chr1	167549147	167550183	167549849	1440
chr1	169199822	169200683	169200298	2863
chr1	171692586	171693330	171692847	1807
chr1	171879407	171880794	171880339	1951
chr1	172037576	172038090	172037900	2844
chr1	172865339	172866421	172865965	697
chr1	173041461	173042187	173041674	3000
chr1	173178220	173179172	173178660	3308
chr1	173432626	173433294	173432957	2786
chr1	174431482	174432441	174432031	1952
chr1	178710335	178711422	178710807	1490
chr1	178712969	178714293	178713727	1235
chr1	179553072	179554131	179553601	899
chr1	180971743	180972522	180972316	1394
chr1	181024345	181025535	181025092	1808
chr1	181501363	181502159	181501624	746
chr1	182163245	182164223	182163778	647
chr1	182353243	182354197	182353720	422
chr1	182780681	182781536	182781157	1624
chr1	185334329	185335452	185334905	1395
chr1	185397397	185398480	185398004	1674
chr1	185423944	185425004	185424573	1644
chr1	185613961	185617135	185616373	450
chr1	185688572	185690030	185689140	122
chr1	185729105	185729690	185729491	1767
chr1	185908186	185909176	185908655	3255
chr1	186499553	186500331	186500022	1282
chr1	188268492	188269203	188268816	1109
chr1	189059934	189060831	189060388	1084
chr1	191038633	191040053	191039133	3391
chr1	191193706	191194620	191194251	2625
chr1	191571194	191572683	191572218	2241
chr1	193054000	193054995	193054595	1374
chr1	193085326	193086355	193085784	706
chr1	193115987	193116928	193116411	374
chr1	193398623	193399880	193399321	49
chr1	194278060	194278888	194278571	2114
chr1	196704357	196705172	196704833	2115
chr10	4477873	4478421	4478194	3017
chr10	5913346	5914567	5913643	2267
chr10	5915052	5915689	5915500	2845
chr10	6239916	6241214	6240751	86
chr10	6451552	6452612	6452045	183
chr10	6457094	6458634	6457760	436
chr10	8409795	8410799	8410300	938
chr10	9223169	9224600	9224068	764
chr10	9251695	9253467	9252531	1095
chr10	9258279	9259260	9258737	1438
chr10	10163882	10165488	10164861	243
chr10	10185573	10186795	10186119	855
chr10	10188274	10190411	10189267	57
chr10	10274717	10276086	10275670	3148
chr10	12160215	12161024	12160538	2602
chr10	12422858	12424015	12423559	3066
chr10	12431140	12432771	12432004	1645
chr10	12587570	12588370	12587852	2576
chr10	12631708	12632643	12632197	2413
chr10	12650403	12652333	12651584	1073
chr10	12818787	12819999	12819574	2982
chr10	12825772	12828883	12826398	448
chr10	14052345	14053299	14052588	1861
chr10	15311176	15312689	15312130	329
chr10	16593555	16594398	16594131	984
chr10	16731667	16733069	16732539	419
chr10	16960693	16961265	16961017	2864
chr10	17437441	17438359	17437812	1516
chr10	17441855	17443382	17442269	2490
chr10	17801278	17801993	17801455	2690
chr10	18728275	18728901	18728556	3018
chr10	19944118	19945098	19944669	962
chr10	20690554	20691749	20691256	123
chr10	20747176	20748106	20747563	2316
chr10	21314124	21315134	21314549	1788
chr10	21394566	21395232	21394794	2491
chr10	23277443	23278167	23277793	1675
chr10	24939698	24940612	24940097	3256
chr10	24980688	24981700	24981223	1346
chr10	24990872	24992918	24991757	192
chr10	25172684	25173870	25173198	1363
chr10	26264435	26265347	26264810	1309
chr10	27310760	27311915	27311361	711
chr10	27312461	27313605	27313030	2983
chr10	27354060	27355308	27354547	871
chr10	27393910	27394856	27394437	2571
chr10	28371566	28372624	28372170	1676
chr10	28378802	28379699	28379195	1875
chr10	28949947	28951225	28950407	896
chr10	30509959	30511460	30511020	1940
chr10	31311623	31312517	31312110	2116
chr10	33768280	33769296	33768588	3409
chr10	33869250	33870823	33870063	2657
chr10	37335641	37337042	37336267	2439
chr10	37346296	37347296	37346912	558
chr10	37522751	37523978	37523391	1921
chr10	37532095	37532829	37532515	2111
chr10	38077032	38078634	38077895	578
chr10	38272754	38274318	38273404	35
chr10	38568430	38569901	38569383	1494
chr10	38684297	38685712	38685057	1862
chr10	38759353	38760648	38760185	2317
chr10	38764045	38765259	38764600	348
chr10	39343756	39344825	39344629	3557
chr10	39345071	39345969	39345552	1612
chr10	39392154	39392893	39392543	3213
chr10	40219459	40220362	40219866	2414
chr10	40243326	40245198	40244555	813
chr10	41196409	41197709	41196705	2492
chr10	41812217	41812862	41812411	3019
chr10	41940689	41941533	41941091	2419
chr10	42199282	42200145	42199750	1677
chr10	42704578	42705564	42704854	2946
chr10	45702569	45703275	45702940	1809
chr10	49509905	49510527	49510248	2268
chr10	51962366	51963429	51962873	879
chr10	52462271	52463468	52462596	1330
chr10	52499309	52500793	52500240	414
chr10	52510866	52512018	52511691	52
chr10	52550241	52551753	52550807	12
chr10	52644826	52645916	52645388	2893
chr10	52654292	52656008	52655562	588
chr10	53225097	53225986	53225558	3114
chr10	56362718	56363754	56363333	3020
chr10	57744956	57745532	57745168	3419
chr10	58924105	58925719	58924391	3613
chr10	59028701	59029400	59028939	3398
chr10	59427510	59428267	59427785	2493
chr10	60740572	60741524	60740999	2494
chr10	61656708	61657923	61657366	3436
chr10	61782469	61783477	61783009	3224
chr10	61881071	61882244	61881737	1184
chr10	62590357	62591729	62591212	1573
chr10	63004154	63005126	63004639	993
chr10	66312189	66313171	66312659	3309
chr10	66315276	66316353	66315664	1625
chr10	66889613	66890558	66890179	994
chr10	67261410	67262308	67261865	2495
chr10	67572415	67573400	67572990	3513
chr10	67628730	67630205	67629665	1768
chr10	67999271	68000480	67999794	1859
chr10	70118119	70119006	70118555	2202
chr10	74762443	74763242	74762711	1953
chr10	74889276	74889923	74889688	2420
chr10	75010970	75012048	75011463	1408
chr10	76692180	76693221	76692659	2318
chr10	76706163	76707194	76706633	1096
chr10	76714371	76715854	76714906	2188
chr10	79533565	79534491	79533934	2846
chr10	79623898	79624826	79624392	1517
chr10	80319598	80320698	80320417	2201
chr10	80391230	80392035	80391641	3021
chr10	80425819	80426965	80426226	2169
chr10	80473204	80474201	80473797	3257
chr10	80760240	80761190	80760895	3169
chr10	82276507	82277661	82277070	1110
chr10	82320912	82322045	82321339	3115
chr10	83099810	83100779	83100293	1574
chr10	83748175	83749695	83749094	101
chr10	83780203	83781280	83780859	477
chr10	83802105	83803449	83802373	600
chr10	83845700	83847491	83846123	926
chr10	83850966	83851850	83851445	2255
chr10	83873316	83874539	83874035	1468
chr10	84266150	84266768	84266338	2496
chr10	85494018	85496219	85495480	1063
chr10	85527456	85528254	85527856	3426
chr10	85710555	85711547	85710989	792
chr10	85752440	85753434	85752982	223
chr10	86282353	86283509	86282980	3370
chr10	86365041	86365864	86365415	1733
chr10	88897218	88898414	88897700	1364
chr10	88905583	88906956	88906096	1518
chr10	88920377	88921971	88921566	2947
chr10	88970884	88972058	88971469	1093
chr10	88993342	88994318	88993855	2068
chr10	89957491	89958161	89957919	2497
chr10	90684780	90686118	90685759	1185
chr10	90703150	90704635	90703686	3586
chr10	90922090	90923307	90922704	581
chr10	91296279	91297555	91296792	397
chr10	92538448	92539121	92538897	2754
chr10	92573769	92574838	92574283	1613
chr10	92624357	92625026	92624687	2259
chr10	92750321	92751912	92751185	2941
chr10	92894928	92895975	92895414	505
chr10	93061679	93062731	93062206	2450
chr10	93124187	93125246	93124904	2865
chr10	93407604	93408965	93407856	3225
chr10	94096149	94097189	94096580	836
chr10	94172354	94173345	94172861	2894
chr10	94386578	94387439	94386928	2002
chr10	95477602	95479078	95478525	2819
chr10	95860145	95861809	95860633	1310
chr10	96090822	96091764	96091165	537
chr10	98634438	98635411	98634847	3399
chr10	98664311	98664912	98664596	2691
chr10	98723656	98725069	98724664	1911
chr10	98725234	98726281	98725747	3527
chr10	98727696	98729076	98728372	630
chr10	98746333	98747456	98746872	489
chr10	102405411	102406634	102406085	423
chr10	107464847	107466065	107465582	1863
chr10	109317761	109318511	109318175	2948
chr10	109320428	109321888	109320915	1252
chr10	109340253	109341552	109341043	3258
chr10	110199130	110200269	110199748	2319
chr10	110953465	110954444	110953942	2398
chr10	110980390	110982224	110980943	1562
chr10	111107420	111108624	111108085	648
chr10	111238959	111239992	111239500	819
chr10	112388886	112389763	112389280	1151
chr10	112390399	112391502	112391265	3615
chr10	114765327	114766329	114765864	1409
chr10	114955394	114956561	114956049	3511
chr10	115799283	115800121	115799738	3116
chr10	115831214	115832312	115831828	963
chr10	116093481	116094509	116093974	1922
chr10	116432175	116433601	116433015	2218
chr10	117548697	117549377	117549199	3351
chr10	117903236	117904298	117903778	1678
chr10	117916010	117916891	117916493	2203
chr10	119646977	119647757	119647427	2106
chr10	119853980	119855157	119854405	345
chr10	119858697	119859830	119859339	1267
chr10	119949700	119950693	119950356	695
chr10	120008246	120009186	120008591	139
chr10	120053313	120054714	120053894	707
chr10	120060893	120062188	120061520	668
chr10	120064680	120065859	120065332	889
chr10	120068729	120069844	120069305	1626
chr10	120085519	120086589	120086060	807
chr10	120174931	120175797	120175401	1810
chr10	120943245	120944429	120943847	112
chr10	121295641	121296662	121296250	1283
chr10	121340636	121341966	121341358	378
chr10	121455176	121456311	121455683	951
chr10	122284686	122285904	122285200	240
chr10	122298755	122300024	122299452	3197
chr10	122319370	122320558	122319901	798
chr10	123785999	123786860	123786581	1152
chr10	127103664	127105704	127105299	1933
chr10	127407109	127408163	127407831	2117
chr10	128023412	128024463	128023788	708
chr10	128136263	128137405	128136953	108
chr10	128142921	128144595	128144012	959
chr10	128357998	128359412	128358853	2470
chr11	3229648	3230251	3230062	2118
chr11	4081722	4082892	4082362	2429
chr11	4084128	4084871	4084419	3184
chr11	4196644	4197537	4197172	3009
chr11	4198781	4199980	4199363	104
chr11	4207939	4209213	4208791	2189
chr11	5695314	5696374	5695879	698
chr11	5755443	5756593	5755884	3589
chr11	5762617	5763207	5763014	3022
chr11	6197063	6198034	6197499	2605
chr11	6371486	6372752	6372556	3332
chr11	6673036	6673752	6673555	1519
chr11	7323423	7324278	7323818	964
chr11	8357498	8358628	8358073	357
chr11	8591485	8593588	8591999	1896
chr11	9866770	9868253	9867725	598
chr11	11727973	11728654	11728380	236
chr11	11751579	11752669	11752162	1954
chr11	16458827	16459492	16459153	3559
chr11	20377180	20378229	20377795	3214
chr11	21061592	21062607	21062400	2692
chr11	21271865	21273344	21272273	3299
chr11	21321862	21322839	21322572	2567
chr11	22319678	22321348	22320269	81
chr11	22337209	22338258	22337718	565
chr11	22728024	22729136	22728608	2801
chr11	22865105	22865975	22865577	2806
chr11	22974370	22975382	22974839	1495
chr11	28670466	28671290	28670864	1453
chr11	29522268	29523249	29522709	1377
chr11	30109020	30110213	30109588	747
chr11	31613555	31614484	31614070	2190
chr11	31729387	31731302	31730662	1769
chr11	31737996	31738971	31738450	1221
chr11	32417489	32418404	32417876	2234
chr11	32452432	32453125	32452859	2693
chr11	32464806	32466437	32465269	3410
chr11	32480642	32481258	32480953	1955
chr11	36089105	36089864	36089589	2787
chr11	42843286	42843953	42843507	684
chr11	42960386	42961587	42961109	3565
chr11	43742906	43743896	43743473	2809
chr11	46024754	46025633	46025200	3001
chr11	47033398	47034578	47033936	2204
chr11	49747233	49748394	49747808	110
chr11	50026077	50027161	50026756	166
chr11	51813690	51814793	51814356	2582
chr11	52378775	52379485	52379205	3067
chr11	52468900	52470272	52469834	1099
chr11	52722251	52723209	52722817	464
chr11	52732334	52733870	52733400	714
chr11	52737304	52738501	52737970	219
chr11	52752514	52754514	52753020	2584
chr11	52777651	52778795	52778294	1186
chr11	54240456	54241152	54240809	1520
chr11	54541642	54543245	54542062	3566
chr11	54698430	54698995	54698621	2095
chr11	54749248	54750752	54750174	606
chr11	55219020	55220509	55219607	757
chr11	56904761	56905430	56904953	3117
chr11	58115485	58116000	58115645	3352
chr11	59272100	59273078	59272636	1492
chr11	60086507	60087428	60086952	1811
chr11	60107454	60108647	60107936	250
chr11	60111011	60112230	60111809	2320
chr11	60124826	60125957	60125403	607
chr11	61863721	61864781	61864297	2765
chr11	61866846	61867950	61867465	2674
chr11	61919806	61920832	61920292	1024
chr11	62372375	62373041	62372771	1521
chr11	62449945	62450912	62450445	3185
chr11	62482512	62483743	62483012	375
chr11	62853085	62854117	62853679	900
chr11	62928098	62929921	62928719	167
chr11	62948502	62949673	62949195	3437
chr11	67399426	67400400	67399955	901
chr11	69230605	69231641	69231114	1244
chr11	69292932	69293872	69293340	1268
chr11	69927738	69928743	69928298	1956
chr11	70002577	70003765	70003384	3152
chr11	70011226	70012688	70011809	1070
chr11	70635295	70636272	70635966	3382
chr11	70642152	70643450	70642808	32
chr11	70644516	70645306	70644937	1923
chr11	70703829	70705504	70704374	2050
chr11	70706082	70707260	70707009	3606
chr11	70744690	70745788	70745231	283
chr11	71571738	71572693	71572189	2937
chr11	71583670	71584594	71584084	2498
chr11	71790026	71790795	71790383	3186
chr11	72097807	72098736	72098409	739
chr11	72181225	72182403	72181974	2260
chr11	72689633	72690496	72690056	1734
chr11	72882957	72883611	72883330	2866
chr11	73097368	73098738	73098176	1025
chr11	75914633	75915427	75915014	3136
chr11	75962288	75963127	75962688	2565
chr11	76400395	76401614	76401084	479
chr11	77072792	77073628	77073091	2013
chr11	77596458	77598123	77597176	2949
chr11	77604446	77605359	77604879	3582
chr11	78038059	78038784	78038409	2622
chr11	78441358	78442236	78441722	2972
chr11	78595756	78597458	78596742	563
chr11	79009285	79010487	79009786	608
chr11	79013611	79014660	79014076	1347
chr11	79119728	79121045	79120264	2036
chr11	79571231	79572097	79571584	1614
chr11	83084194	83084904	83084446	2499
chr11	84891897	84892682	84892224	2735
chr11	85205350	85206614	85206035	3198
chr11	85454046	85455653	85455148	1564
chr11	85491369	85493003	85492218	499
chr11	85509851	85510698	85510504	1835
chr11	85526781	85527736	85527191	2083
chr11	85730452	85731255	85730743	814
chr11	86400021	86401061	86400651	3118
chr11	86437453	86438514	86437953	2421
chr11	86570805	86572165	86571223	3496
chr11	86782075	86783537	86783051	2321
chr11	86838504	86839802	86839100	2322
chr11	87122917	87124483	87123277	1585
chr11	87256769	87257555	87257116	1284
chr11	87262160	87262720	87262523	3226
chr11	89685350	89686378	89685690	1348
chr11	90325207	90325788	90325406	2500
chr11	94816102	94816986	94816540	2119
chr11	95493381	95494249	95493921	3400
chr11	95505589	95506378	95505843	74
chr11	95975028	95975958	95975480	2269
chr11	97263867	97265351	97264229	2839
chr11	97283415	97284547	97284198	2501
chr11	97666017	97667053	97666459	3497
chr11	97669074	97670082	97669579	740
chr11	97690989	97692428	97691317	2502
chr11	98768403	98769424	98768824	3023
chr11	100714104	100715035	100714627	2406
chr11	100864122	100865064	100864532	267
chr11	100885697	100886909	100886530	3443
chr11	100895640	100897075	100896824	1476
chr11	100975847	100977672	100977018	1332
chr11	101326086	101326853	101326622	2503
chr11	101488471	101489488	101488895	3457
chr11	103003474	103004418	103004002	1410
chr11	103173414	103174014	103173653	2736
chr11	103261008	103261936	103261554	379
chr11	104133306	104134269	104133761	3525
chr11	104460725	104461470	104461194	715
chr11	104472458	104473675	104473094	106
chr11	105684085	105685372	105684746	2069
chr11	106432880	106434570	106433545	302
chr11	106449734	106451026	106450576	1285
chr11	107881634	107883085	107882302	1357
chr11	108011556	108012396	108012052	3024
chr11	108872492	108873864	108873318	3454
chr11	109734598	109735509	109735146	1454
chr11	112869692	112870427	112870043	1679
chr11	113006822	113007745	113007332	1349
chr11	113045009	113046172	113045679	1455
chr11	113049162	113050438	113049837	601
chr11	113082405	113083562	113083018	2681
chr11	113137848	113139269	113138449	1311
chr11	113153099	113154579	113153836	63
chr11	113578741	113579810	113579318	637
chr11	114587843	114588642	114588370	2766
chr11	114932991	114933785	114933537	2802
chr11	115083533	115084502	115084020	1957
chr11	115817725	115818535	115818080	1575
chr11	115948815	115949765	115949011	3594
chr11	116383735	116385381	116384442	1187
chr11	116677757	116678437	116677917	3458
chr11	116959610	116960618	116960022	2767
chr11	117068873	117070000	117069636	3082
chr11	117093319	117094229	117093746	923
chr11	118058978	118059931	118059374	3259
chr11	118188442	118189462	118189067	3596
chr11	118198793	118199433	118198971	3227
chr11	118224132	118225030	118224432	3187
chr11	119570320	119571079	119570597	2903
chr11	119790885	119791907	119791506	3137
chr11	119969001	119969747	119969270	1026
chr11	120084668	120086054	120085323	66
chr11	120090711	120091660	120090888	3501
chr12	4671719	4672768	4672271	1496
chr12	7201809	7202826	7202127	3323
chr12	7219396	7220759	7219904	954
chr12	8095996	8097421	8096928	509
chr12	8097798	8098777	8098216	3469
chr12	8174935	8176050	8175475	1661
chr12	8187780	8189308	8188717	1598
chr12	8392860	8394094	8393427	1522
chr12	8976370	8977329	8976950	2929
chr12	9862709	9863534	9863113	1497
chr12	9864412	9865324	9864887	735
chr12	11324183	11325004	11324638	1448
chr12	11331077	11332122	11331578	1076
chr12	13000652	13001669	13001312	1411
chr12	13083248	13084964	13084024	851
chr12	16595117	16596050	16595583	1836
chr12	16796321	16797250	16796760	1627
chr12	16842638	16843859	16843164	876
chr12	16857244	16858270	16857763	965
chr12	16876860	16878241	16877401	510
chr12	16879714	16880355	16879969	2913
chr12	17227097	17228020	17227585	1873
chr12	21431536	21432784	21432374	2120
chr12	25553296	25554293	25553647	3128
chr12	25578668	25579677	25579219	686
chr12	25718248	25719881	25719122	1804
chr12	25816555	25817696	25817261	2694
chr12	26593054	26593718	26593465	1812
chr12	27079161	27080723	27080081	1071
chr12	27522857	27523791	27523370	2461
chr12	27978678	27979948	27979290	75
chr12	29360076	29360982	29360483	1813
chr12	31955869	31956932	31956461	988
chr12	31994930	31996329	31995797	1027
chr12	32633929	32634555	32634360	1958
chr12	33703107	33704732	33703676	224
chr12	33866404	33867263	33866926	413
chr12	33919994	33921221	33920495	3310
chr12	35758232	35759278	35758650	1140
chr12	35886504	35887512	35887061	3498
chr12	35890691	35891251	35891070	3061
chr12	35894643	35895657	35895137	1286
chr12	35930518	35931532	35930868	3327
chr12	35943933	35945199	35944489	105
chr12	35950080	35951251	35950740	1022
chr12	35976069	35977627	35976872	1059
chr12	36368737	36369670	36369351	2742
chr12	36375491	36376498	36376015	3188
chr12	37036040	37037143	37036734	2779
chr12	37043551	37045001	37044549	3119
chr12	37070264	37071472	37070952	793
chr12	37151978	37153921	37153268	2323
chr12	37161426	37162374	37161982	1312
chr12	37233434	37234316	37233917	3104
chr12	37236311	37237327	37236745	1376
chr12	40665273	40666141	40665779	2415
chr12	41242807	41243445	41242972	3025
chr12	45455321	45456968	45456329	272
chr12	45491153	45492143	45491586	2324
chr12	45554297	45555448	45555008	3377
chr12	45563298	45564720	45564021	1275
chr12	45646488	45647973	45647414	930
chr12	50244865	50245883	50245410	1523
chr12	51436523	51437614	51436916	2325
chr12	52562663	52563291	52563031	2422
chr12	52948672	52949666	52949153	306
chr12	53594187	53595388	53594771	2606
chr12	53883422	53884483	53883907	2504
chr12	53936061	53937025	53936558	1876
chr12	54162091	54163187	54162672	2037
chr12	55084617	55085585	55085058	2326
chr12	56566994	56567972	56567477	1721
chr12	66514081	66514953	66514504	2505
chr12	66528129	66530310	66529587	497
chr12	67258025	67259198	67258832	2930
chr12	70488994	70489859	70489666	237
chr12	70489999	70491384	70490723	221
chr12	70551702	70552800	70552262	1378
chr12	70602501	70603956	70603051	259
chr12	70611547	70612378	70612014	1524
chr12	70663966	70664549	70664289	1959
chr12	70994831	70995914	70995479	285
chr12	71151289	71152317	71151860	2014
chr12	71716918	71718161	71717649	966
chr12	71951913	71953054	71952362	1586
chr12	72474483	72475457	72474879	716
chr12	72563437	72564514	72563963	737
chr12	72635955	72637380	72637124	2743
chr12	72998925	73001249	73000781	1132
chr12	74302244	74303068	74302659	2270
chr12	74478693	74479734	74479203	995
chr12	76497523	76498478	76497913	3590
chr12	76525089	76526075	76525635	1222
chr12	77559768	77560573	77560160	717
chr12	77587527	77588383	77588080	638
chr12	79056477	79057559	79056711	2840
chr12	79057690	79058634	79058176	170
chr12	79878667	79880120	79878950	2628
chr12	80026572	80027551	80027064	1680
chr12	80336234	80337215	80336808	1276
chr12	80452767	80454129	80453175	2867
chr12	80608105	80609007	80608488	3598
chr12	80938804	80939718	80939340	1681
chr12	80979987	80981954	80980346	633
chr12	81076709	81077582	81077212	2271
chr12	81193304	81194235	81193763	2847
chr12	81213992	81214895	81214439	837
chr12	81235998	81236913	81236400	1188
chr12	81480432	81481458	81480902	736
chr12	81954493	81955130	81954904	3371
chr12	83072197	83073561	83072974	380
chr12	83348448	83349281	83348723	3092
chr12	83528182	83528792	83528619	2805
chr12	85349918	85350678	85350328	2506
chr12	85555270	85556357	85555828	3199
chr12	86691206	86692331	86691574	639
chr12	86706783	86708094	86707263	790
chr12	86814315	86815508	86814884	1
chr12	86954714	86955501	86955091	3502
chr12	88141831	88142873	88142318	1287
chr12	88164863	88168826	88165948	1085
chr12	88291032	88292587	88291578	748
chr12	88722018	88722829	88722492	2744
chr12	88738756	88739575	88739151	1412
chr12	89646667	89647838	89647313	2121
chr12	89700981	89702062	89701555	820
chr12	91403752	91404477	91404164	1525
chr12	99307028	99308023	99307483	358
chr12	99951325	99952589	99951901	1329
chr12	101441982	101442804	101442325	2056
chr12	101705649	101706179	101705944	2868
chr12	102977830	102978853	102978340	996
chr12	103031152	103033448	103031736	1179
chr12	103036365	103037156	103036826	1074
chr12	103045317	103046487	103045921	190
chr12	103068745	103069629	103069142	2451
chr12	103299051	103300428	103299730	11
chr12	103854622	103855715	103855148	1223
chr12	104002258	104003812	104003355	1269
chr12	104070571	104071575	104070969	3470
chr12	105653520	105654523	105654060	2596
chr12	106096619	106097619	106097057	626
chr12	106134947	106135637	106135400	1189
chr12	106264109	106265135	106264624	902
chr12	109451417	109452346	109451810	572
chr12	109482705	109483764	109483368	3026
chr12	111723878	111724837	111724420	2507
chr12	111944634	111945551	111944889	2656
chr12	112668134	112669635	112668680	2191
chr12	113033070	113033942	113033585	1288
chr12	113189574	113190563	113190078	1079
chr12	113754953	113755982	113755345	2768
chr12	113789455	113790838	113790195	424
chr12	114031917	114032925	114032530	2788
chr12	114033709	114034787	114034270	771
chr12	114261174	114261977	114261484	903
chr12	117419553	117420396	117420033	3068
chr12	119127743	119129048	119128341	317
chr12	120408179	120409041	120408586	3528
chr13	3806161	3807685	3807217	2015
chr13	4770423	4771323	4770844	1396
chr13	5603151	5604124	5603730	417
chr13	5723286	5724362	5723829	398
chr13	8151139	8151885	8151636	2789
chr13	8644232	8645322	8645138	3286
chr13	9180059	9181447	9180528	1413
chr13	9276681	9278085	9277589	3597
chr13	9303401	9304651	9304212	3529
chr13	9353092	9353729	9353289	2087
chr13	12403344	12404541	12403908	1790
chr13	13117905	13119033	13118505	64
chr13	13260616	13261579	13261072	65
chr13	13494267	13495202	13494693	1960
chr13	13630426	13631501	13630957	308
chr13	15512677	15514266	15513758	2623
chr13	15533365	15534611	15533959	718
chr13	15535899	15536948	15536408	1466
chr13	15642334	15643027	15642716	1336
chr13	19682626	19683747	19683155	359
chr13	20920459	20921790	20921171	76
chr13	23801159	23802815	23801780	2471
chr13	23851908	23854039	23853339	2
chr13	24005481	24006157	24005863	3353
chr13	24108824	24110091	24109809	1526
chr13	24110124	24111218	24110652	452
chr13	24657093	24658499	24657955	1289
chr13	25174846	25175871	25175360	997
chr13	25830181	25831112	25830657	1111
chr13	26751000	26752360	26751628	852
chr13	27821947	27822998	27822383	1028
chr13	28509038	28510430	28509793	472
chr13	28511371	28512085	28511641	3487
chr13	28549027	28550548	28549410	2272
chr13	28644286	28645445	28645038	3338
chr13	28782159	28783539	28782633	1961
chr13	28789238	28790128	28789595	3170
chr13	28848903	28850190	28849794	3200
chr13	28936175	28937254	28936672	1270
chr13	29629025	29630396	29629411	1029
chr13	29641341	29643894	29642948	2327
chr13	29664151	29665220	29664759	3567
chr13	29852044	29852975	29852519	2916
chr13	30077400	30078835	30077924	171
chr13	30460169	30461197	30460612	3228
chr13	30844369	30845649	30844918	2408
chr13	30873730	30875078	30874226	1313
chr13	32412817	32413774	32413338	2122
chr13	32796690	32797971	32797249	1163
chr13	33143477	33144505	33144072	1414
chr13	34204041	34204567	34204372	3183
chr13	34204658	34205781	34205269	2328
chr13	34325919	34326819	34326485	2329
chr13	34329919	34331936	34330627	1277
chr13	34658325	34659718	34658880	2256
chr13	34898229	34899226	34898634	2572
chr13	34906019	34907058	34906675	867
chr13	35107434	35108535	35108247	1796
chr13	35593038	35594059	35593553	1112
chr13	39597062	39598458	39597924	55
chr13	39972893	39973905	39973429	238
chr13	40010125	40011753	40010672	60
chr13	40017973	40018472	40018166	2508
chr13	40501833	40502724	40502441	2123
chr13	40745469	40746933	40746447	2235
chr13	40825381	40826540	40826003	1054
chr13	41434535	41435139	41434869	2558
chr13	43100321	43101336	43100614	3311
chr13	43379854	43380549	43380217	719
chr13	43384263	43385144	43384573	3579
chr13	43444555	43445286	43444916	2729
chr13	44180895	44181728	44181208	1030
chr13	44494863	44495672	44495129	3027
chr13	44516625	44518600	44517476	26
chr13	45513846	45515088	45514579	1770
chr13	45524279	45525075	45524802	853
chr13	45550147	45551128	45550566	2236
chr13	45564146	45566081	45565262	655
chr13	45779984	45781155	45780605	573
chr13	45873253	45874234	45873704	1080
chr13	45888670	45889798	45889149	1379
chr13	45905118	45906123	45905659	1434
chr13	45945250	45946533	45946079	3530
chr13	46027429	46028735	46027769	1527
chr13	46203345	46204321	46203858	381
chr13	46422415	46423150	46422771	1682
chr13	46935406	46936558	46936162	2440
chr13	47069723	47071601	47070688	2950
chr13	47431405	47432262	47431915	2695
chr13	47647591	47648413	47648055	3028
chr13	48661404	48662201	48661843	2170
chr13	49059931	49060905	49060428	998
chr13	51440797	51441948	51441368	490
chr13	51443391	51444777	51444202	119
chr13	51499002	51500223	51500042	3010
chr13	52873174	52874326	52873688	904
chr13	53037606	53038959	53038059	2423
chr13	54725975	54727360	54726471	2977
chr13	54738733	54739637	54739251	1031
chr13	54822137	54822913	54822557	2330
chr13	56788455	56789512	56788972	754
chr13	57132280	57133187	57132797	1271
chr13	60120780	60121533	60121320	2651
chr13	60149172	60149949	60149393	2917
chr13	60151910	60152947	60152385	433
chr13	60200963	60201551	60201402	2696
chr13	63255962	63257251	63256794	2857
chr13	63395008	63396377	63395700	340
chr13	63418919	63419936	63419385	2192
chr13	63424350	63425324	63424816	2904
chr13	63425791	63427157	63426192	3503
chr13	63792773	63793965	63793389	504
chr13	67673353	67674177	67673773	568
chr13	73115231	73116143	73115661	2273
chr13	73584058	73585361	73584840	1582
chr13	74004726	74005590	74005082	2010
chr13	74018317	74020200	74019640	1077
chr13	74029965	74030926	74030380	2858
chr13	76081197	76081992	76081682	425
chr13	78948538	78950208	78949079	950
chr13	81360532	81362083	81361510	70
chr13	83743101	83744499	83743299	3488
chr13	83870987	83871559	83871376	3387
chr13	83871674	83872381	83871902	2658
chr13	84162776	84164097	84163551	538
chr13	84588211	84589582	84589108	2070
chr13	85072307	85073232	85072838	1528
chr13	89967388	89968703	89968280	1450
chr13	90419213	90420426	90419741	699
chr13	90534137	90535445	90534738	3201
chr13	93434479	93435715	93435292	2790
chr13	93442646	93443642	93443036	3591
chr13	93636470	93637247	93636829	3202
chr13	94258271	94259229	94258734	905
chr13	94888394	94889704	94888949	102
chr13	94902128	94903113	94902660	1488
chr13	94924212	94925325	94924900	1113
chr13	94942115	94943776	94943185	2452
chr13	95068107	95069234	95068567	220
chr13	96729398	96730342	96729862	2124
chr13	98019136	98020238	98019649	1141
chr13	99325946	99326870	99326374	2659
chr13	99715655	99716414	99715978	2848
chr13	99961500	99962375	99961949	3129
chr13	100707431	100708399	100707899	1365
chr13	101351879	101352682	101352329	1962
chr13	102547337	102548367	102547876	2607
chr13	103560227	103560966	103560531	2016
chr13	104329453	104330453	104329958	1963
chr13	104805029	104806582	104806045	3171
chr13	108283976	108285033	108284373	3568
chr13	108431718	108432903	108432297	838
chr13	108620862	108622150	108621768	3215
chr13	109055242	109056087	109055706	1415
chr13	109086695	109087709	109087088	3471
chr13	109388526	109390336	109389064	158
chr13	109609761	109610519	109610270	2125
chr13	109650583	109651669	109651218	2825
chr13	110032448	110033422	110032895	2831
chr13	110067671	110068440	110068098	2984
chr13	110068597	110069551	110069056	262
chr13	110326445	110327629	110327156	2193
chr13	110484068	110485192	110484609	1683
chr13	110611962	110615624	110612836	212
chr13	111529073	111529886	111529526	1912
chr13	111642122	111644092	111642304	3312
chr13	112081957	112083024	112082472	1814
chr13	112718952	112719615	112719419	3229
chr13	112891010	112891741	112891234	1845
chr13	114788849	114789653	114789261	3306
chr13	114800668	114802942	114802334	765
chr13	114908157	114909286	114908519	1489
chr13	115277978	115278899	115278461	1761
chr13	115628525	115629636	115629139	1416
chr13	118346914	118347973	118347269	720
chr13	118360071	118361567	118360959	438
chr13	118382913	118384473	118383457	278
chr14	8658571	8659796	8659317	1762
chr14	11987176	11988149	11987628	2057
chr14	15431526	15433230	15432319	772
chr14	15441587	15442578	15442013	1913
chr14	15697046	15698850	15697560	960
chr14	15907972	15908876	15908550	3427
chr14	17265299	17266477	17265958	1255
chr14	17316048	17317009	17316475	1114
chr14	17654722	17655419	17655173	2629
chr14	18700581	18701328	18700936	1964
chr14	18750119	18751300	18750777	609
chr14	20962697	20963868	20963393	103
chr14	20973983	20974952	20974453	1604
chr14	21052335	21053669	21052956	156
chr14	21248627	21249801	21249459	3216
chr14	21624133	21625085	21624759	3514
chr14	22344891	22345874	22345464	3535
chr14	22641540	22642725	22642188	1314
chr14	24730073	24730910	24730582	1901
chr14	25126145	25127561	25126625	539
chr14	26190788	26191778	26191218	2832
chr14	26198038	26199008	26198553	1115
chr14	26281342	26282100	26281656	3189
chr14	26440260	26440991	26440596	3307
chr14	26545051	26545891	26545407	1684
chr14	26554002	26555344	26554519	1190
chr14	26672360	26674105	26672991	467
chr14	27354856	27355818	27355372	2630
chr14	32216203	32217873	32216633	2833
chr14	32472788	32474425	32473692	225
chr14	32474759	32476138	32475776	2459
chr14	32477050	32478583	32477455	3203
chr14	32478617	32479403	32478870	1724
chr14	32482112	32483696	32482607	1576
chr14	32494250	32495235	32494664	579
chr14	32593997	32595370	32594553	3616
chr14	33114438	33115389	33115007	656
chr14	33117999	33118513	33118334	2849
chr14	33336485	33337786	33337386	2107
chr14	37782865	37785052	37784005	527
chr14	37785758	37786516	37786136	2791
chr14	41769557	41770524	41769914	540
chr14	45810037	45811266	45810847	293
chr14	45940892	45942089	45941526	1386
chr14	45944841	45946208	45945321	2396
chr14	46097237	46099347	46097662	2905
chr14	46141419	46142093	46141817	3392
chr14	46326523	46328368	46327137	1469
chr14	46392383	46393806	46393225	300
chr14	47961150	47962422	47961995	657
chr14	47970094	47971300	47970877	824
chr14	47981056	47982281	47981627	906
chr14	47990147	47992135	47991608	700
chr14	55062217	55063246	55062737	674
chr14	55359898	55361928	55361336	999
chr14	55367202	55368287	55367836	2597
chr14	55673637	55674795	55674166	1897
chr14	55872033	55872971	55872534	2331
chr14	56581911	56582394	56582199	1116
chr14	57703704	57704936	57704397	1722
chr14	57934003	57936612	57935663	1191
chr14	57966006	57967684	57967101	146
chr14	58379094	58380005	58379413	1117
chr14	60169073	60170328	60169822	1000
chr14	61205416	61206685	61206119	3093
chr14	61467530	61468525	61468032	559
chr14	62811300	62812587	62811820	781
chr14	63486601	63487598	63487172	2088
chr14	63750649	63751660	63751211	583
chr14	63964782	63965603	63965113	2631
chr14	65607289	65608493	65607947	640
chr14	65736571	65737683	65737250	1864
chr14	65773050	65774125	65773524	138
chr14	66239481	66240138	66239977	3354
chr14	66240738	66241885	66241179	1236
chr14	66357598	66358999	66358012	2660
chr14	66997038	66998079	66997468	3573
chr14	67027806	67029175	67028806	1744
chr14	68387679	68388750	68388194	253
chr14	68410696	68412104	68411314	82
chr14	68528007	68528735	68528234	3324
chr14	68535235	68536453	68535661	3389
chr14	69209163	69209945	69209554	2902
chr14	69572682	69573690	69573183	1032
chr14	69887410	69888413	69887841	3094
chr14	70456547	70457341	70456864	3313
chr14	70501404	70502942	70502102	91
chr14	70603020	70605467	70604417	1142
chr14	70605545	70606206	70605741	2509
chr14	70642304	70643132	70642761	1846
chr14	70735976	70737149	70736652	1470
chr14	71446387	71447741	71447154	213
chr14	71528158	71528890	71528448	1847
chr14	73841307	73842347	73841818	434
chr14	75245699	75246668	75246170	2608
chr14	75249928	75250766	75250521	3536
chr14	75274565	75275771	75275235	1556
chr14	75302433	75303284	75302778	2697
chr14	76263072	76264287	76263730	93
chr14	76620914	76622641	76622160	2698
chr14	76878401	76879108	76878825	3029
chr14	77087477	77088419	77088129	2834
chr14	77354607	77355585	77355124	2089
chr14	78036545	78037339	78037003	1192
chr14	78858443	78860136	78859615	3130
chr14	79465422	79465961	79465620	1331
chr14	79602633	79603878	79603441	1193
chr14	86475843	86476872	86476277	1001
chr14	100023236	100024731	100024145	2332
chr14	100030121	100031037	100030556	1315
chr14	102126638	102127636	102127065	675
chr14	102183433	102184566	102183956	2071
chr14	102269090	102269926	102269543	2167
chr14	102392397	102393443	102392640	3083
chr14	102661357	102662299	102661848	453
chr14	104177232	104178151	104177623	3355
chr14	104290393	104291402	104290953	1435
chr14	104297711	104299494	104298642	178
chr14	105987365	105988661	105987788	1316
chr14	106068011	106068868	106068506	701
chr14	106410559	106411130	106410754	3030
chr14	106451908	106452715	106452486	2609
chr14	118450921	118452718	118451776	5
chr14	119164182	119165337	119164706	1358
chr14	119273682	119275070	119274567	1033
chr14	119610984	119612049	119611404	2098
chr14	120349919	120350772	120350422	1355
chr14	120754225	120755254	120754871	184
chr14	120782166	120783173	120782708	1628
chr14	120906154	120907599	120906952	222
chr14	121120835	121122378	121121403	782
chr14	121161156	121162060	121161565	2242
chr14	121451892	121452965	121452415	2219
chr14	121567395	121568509	121567809	2699
chr14	121604543	121605529	121604902	1848
chr14	122013363	122014343	122013816	2472
chr14	123930003	123931235	123930688	2510
chr15	3855330	3856165	3855770	3537
chr15	3945350	3946294	3945856	3156
chr15	3977109	3978582	3978094	2632
chr15	4041677	4042731	4042091	3578
chr15	6290039	6291107	6290522	1837
chr15	6514542	6516129	6515163	1685
chr15	6666005	6667086	6666622	3372
chr15	6972657	6973578	6973067	967
chr15	7812643	7813496	7813034	1317
chr15	7827689	7828764	7828325	619
chr15	7939834	7940808	7940324	541
chr15	8183880	8184731	8184258	1735
chr15	9018607	9019185	9018785	3552
chr15	10745558	10746655	10746266	968
chr15	10747857	10748844	10748023	3621
chr15	10772344	10773290	10772861	2077
chr15	10793248	10794175	10793865	1002
chr15	10798187	10799556	10799023	2171
chr15	10819600	10820586	10820086	1914
chr15	10932381	10933353	10932980	2333
chr15	11356212	11357064	11356648	1600
chr15	11380647	11381720	11381031	2416
chr15	11384858	11386545	11385950	68
chr15	11389666	11390732	11390123	2769
chr15	11419986	11421569	11420529	1003
chr15	11519354	11520429	11519991	1849
chr15	11731690	11732738	11732177	1034
chr15	11765464	11766475	11765924	1456
chr15	11774646	11775921	11775383	1064
chr15	11874572	11875322	11874949	1877
chr15	12040697	12041966	12041301	1133
chr15	12177404	12178147	12177805	2700
chr15	12270339	12271653	12270716	3610
chr15	18855014	18856274	18855548	165
chr15	25356130	25356772	25356323	2869
chr15	25375320	25376246	25375860	2951
chr15	25378444	25379246	25378849	2810
chr15	25389204	25390808	25389804	321
chr15	25506826	25508236	25507399	947
chr15	25603675	25604684	25604138	1941
chr15	25619278	25620612	25619846	23
chr15	25807036	25808680	25808018	2701
chr15	25828468	25829665	25828986	1224
chr15	25844472	25845730	25845034	1752
chr15	26766751	26767926	26767224	1745
chr15	27711422	27713035	27712561	2334
chr15	27737628	27738743	27738197	3538
chr15	27853394	27854279	27853704	1097
chr15	31543506	31544223	31543738	2835
chr15	34301546	34302064	34301846	2237
chr15	34338731	34339914	34339189	3031
chr15	34406769	34407719	34407387	2895
chr15	34833553	34834888	34834020	1118
chr15	36226401	36227227	36226887	759
chr15	36292118	36293566	36293100	2598
chr15	36370824	36371931	36371215	1753
chr15	36802820	36803693	36803281	1838
chr15	37361098	37361763	37361337	2335
chr15	37361949	37363663	37362387	1878
chr15	37388313	37389720	37388749	3539
chr15	37391408	37392578	37391898	1153
chr15	38026003	38026866	38026474	2126
chr15	38105845	38106726	38106328	3260
chr15	38879106	38879790	38879401	2511
chr15	38884762	38885963	38885288	124
chr15	41524469	41525892	41525414	1965
chr15	42786589	42787628	42786921	37
chr15	42796873	42797808	42797285	2702
chr15	42885891	42886965	42886558	2952
chr15	50231454	50232711	50232178	2975
chr15	52454710	52455781	52455223	1154
chr15	53090411	53091412	53090905	569
chr15	54122428	54123505	54122809	610
chr15	54125774	54126739	54126266	2512
chr15	54778504	54780068	54779351	880
chr15	54921686	54922754	54921972	3459
chr15	55101073	55102346	55101652	31
chr15	55130734	55131907	55131239	2194
chr15	55133777	55134724	55134226	2220
chr15	55268309	55269457	55268886	1806
chr15	55271739	55272394	55272197	3292
chr15	55288522	55289648	55289117	1815
chr15	55310537	55312700	55311216	3246
chr15	55578022	55578974	55578414	2038
chr15	55631659	55632855	55632373	1686
chr15	55783908	55785020	55784491	1771
chr15	55873735	55874666	55874115	721
chr15	56251111	56252849	56252438	2940
chr15	56267184	56268559	56267931	44
chr15	56304933	56305869	56305430	3190
chr15	56310825	56311906	56311260	862
chr15	57738023	57738764	57738357	3489
chr15	57797336	57798279	57797672	794
chr15	57966169	57967296	57966647	1086
chr15	57969849	57970565	57970332	2870
chr15	58198864	58200041	58199407	2826
chr15	59029159	59030203	59029803	2703
chr15	59223127	59224326	59223650	1175
chr15	59242714	59244243	59243711	2513
chr15	59553325	59554091	59553745	2039
chr15	59591100	59591995	59591532	2274
chr15	59635324	59636446	59635878	2430
chr15	59657854	59659045	59658394	1772
chr15	60399927	60400595	60400366	1397
chr15	60684527	60685387	60685071	2661
chr15	61910577	61911591	61911209	839
chr15	61936028	61936703	61936285	3356
chr15	61950429	61951159	61950687	2473
chr15	61952335	61953165	61952606	574
chr15	62155551	62156680	62156046	2953
chr15	63191364	63192184	63191665	3460
chr15	63231623	63232767	63232134	877
chr15	63447436	63449557	63448202	15
chr15	63460163	63460842	63460509	2127
chr15	63489144	63490352	63490032	175
chr15	63502350	63503805	63502840	3138
chr15	63506582	63507839	63507064	503
chr15	63558155	63560764	63558545	121
chr15	63986827	63987881	63987490	1773
chr15	64054656	64055540	64055135	1577
chr15	64057640	64058462	64058077	1759
chr15	64071812	64072655	64072169	3032
chr15	64088689	64090412	64089892	722
chr15	64126238	64127597	64126755	2935
chr15	64527093	64527661	64527480	3172
chr15	66339257	66340024	66339642	3033
chr15	66546218	66547815	66547334	399
chr15	66563735	66564789	66564207	2172
chr15	66675300	66676238	66675798	1087
chr15	66707148	66708199	66707700	353
chr15	66792654	66794426	66793249	439
chr15	66850432	66851461	66850959	783
chr15	67103829	67104627	67104167	1687
chr15	67189256	67190030	67189619	1736
chr15	67194935	67196728	67196184	435
chr15	67843427	67844123	67843665	2275
chr15	67933150	67933922	67933508	575
chr15	68232385	68233762	68233360	2918
chr15	72113546	72115251	72114544	127
chr15	72992389	72993039	72992763	1194
chr15	73295433	73296706	73296175	491
chr15	75650893	75651773	75651309	2128
chr15	75970255	75970961	75970558	2514
chr15	76291837	76292592	76292206	2276
chr15	76295453	76296183	76295783	2871
chr15	77653771	77654757	77654321	1629
chr15	77718286	77719326	77718853	407
chr15	78279902	78280957	78280179	3230
chr15	78985812	78987364	78986669	69
chr15	78989392	78990279	78989711	9
chr15	78993337	78995185	78993989	4
chr15	78995602	78996924	78996166	2230
chr15	79006308	79007070	79006576	2336
chr15	79023107	79024057	79023562	907
chr15	79025462	79026714	79026070	492
chr15	79031661	79032811	79032442	268
chr15	79037849	79040347	79039701	111
chr15	79053253	79054798	79054359	1195
chr15	79852732	79853491	79853104	2872
chr15	79856715	79857739	79857279	1688
chr15	79927843	79930195	79929376	1242
chr15	79935788	79936931	79936361	77
chr15	80514074	80515080	80514571	1723
chr15	82984319	82985128	82984659	1689
chr15	83053793	83054327	83053990	3428
chr15	83255941	83256831	83256398	2474
chr15	84803502	84804642	84804039	641
chr15	84805833	84806794	84806357	570
chr15	85998353	85999750	85999147	162
chr15	90880498	90881125	90880745	1529
chr15	93359893	93361716	93360766	10
chr15	94222411	94223713	94223308	3472
chr15	94260822	94261934	94261253	2090
chr15	94273461	94275575	94274866	3105
chr15	95634373	95635267	95634989	3034
chr15	95635319	95636010	95635515	1119
chr15	95653850	95654819	95654461	3294
chr15	95658933	95660064	95659385	3261
chr15	95782287	95783218	95782761	1879
chr15	95784163	95785128	95784655	1690
chr15	97580891	97581582	97581286	3314
chr15	98351228	98352201	98351671	658
chr15	99250405	99251863	99251356	3583
chr15	99254466	99255502	99255084	1035
chr15	99384018	99384943	99384365	1597
chr15	99415688	99416871	99416363	2873
chr15	99680278	99681461	99680948	1479
chr15	99719609	99720783	99720122	1139
chr15	99975569	99976593	99976053	989
chr15	99997627	99998988	99998425	415
chr15	100359171	100360151	100359623	1816
chr15	101107547	101108648	101108094	2337
chr15	101166845	101167873	101167409	881
chr15	101200600	101201590	101201038	1530
chr15	101934263	101935279	101934750	1417
chr15	103326332	103327207	103326776	2577
chr16	4912459	4913532	4912976	2453
chr16	4944077	4945324	4944779	38
chr16	8530125	8531498	8530971	908
chr16	10975742	10976962	10976659	859
chr16	11007968	11009246	11008995	3569
chr16	11012320	11013607	11012931	1630
chr16	11164493	11165503	11164978	602
chr16	11656959	11658132	11657621	1120
chr16	13548610	13549923	13549490	2205
chr16	14826801	14827725	14827276	440
chr16	15637199	15638210	15637750	1817
chr16	15984045	15985097	15984660	1746
chr16	15991481	15992775	15992388	2195
chr16	18096333	18097079	18096551	2338
chr16	18182633	18183285	18182924	3429
chr16	18470856	18472727	18471720	1691
chr16	18788776	18789493	18789085	3388
chr16	21398271	21399065	21398692	3173
chr16	21606461	21607845	21607441	3604
chr16	22067274	22068209	22067571	396
chr16	22733868	22734744	22734271	2078
chr16	22839020	22840242	22839714	669
chr16	22877213	22878827	22877885	244
chr16	22880721	22881542	22881182	1531
chr16	23166561	23167907	23166882	2585
chr16	23226183	23227448	23226967	1036
chr16	23235107	23236134	23235554	969
chr16	23239981	23241541	23240971	1935
chr16	23270438	23271282	23270875	611
chr16	23272030	23273198	23272823	181
chr16	23314493	23315667	23315021	1605
chr16	23518662	23519643	23519054	3035
chr16	26099152	26100036	26099752	1818
chr16	26609400	26610161	26609849	3069
chr16	26626062	26626888	26626369	2221
chr16	26668738	26669886	26669281	1057
chr16	26727598	26729399	26728495	927
chr16	28952897	28953818	28953324	2954
chr16	29754556	29755638	29755099	815
chr16	29968250	29969481	29968821	2129
chr16	30475663	30476539	30476277	155
chr16	30513344	30514546	30513930	318
chr16	31598441	31599407	31599143	2792
chr16	31603166	31604012	31603595	2017
chr16	31608447	31609787	31609295	2578
chr16	32936810	32938074	32937286	2931
chr16	32978424	32979171	32978662	2173
chr16	33056069	33057245	33056315	3036
chr16	33459532	33460664	33460146	2339
chr16	33907595	33908980	33908066	1272
chr16	34926171	34927745	34927247	2770
chr16	38245378	38246603	38246205	3444
chr16	38391987	38392899	38392461	2196
chr16	38635936	38637206	38636281	3139
chr16	38653094	38654139	38653622	1290
chr16	38697504	38698472	38697904	201
chr16	38945372	38948138	38945893	554
chr16	40289992	40291398	40290519	2515
chr16	43577034	43578128	43577648	360
chr16	43591687	43592854	43592299	590
chr16	44544659	44546053	44545476	1797
chr16	44951423	44952470	44951938	3084
chr16	44983584	44984805	44984049	1498
chr16	45078876	45080370	45079685	179
chr16	45244417	45245909	45245342	2026
chr16	45327946	45329125	45328640	1662
chr16	45832191	45832947	45832659	2568
chr16	45837648	45838812	45838157	676
chr16	45936220	45937309	45936872	3120
chr16	48078477	48079070	48078793	1966
chr16	48646023	48647203	48646572	390
chr16	48890551	48891656	48891024	773
chr16	52262350	52263295	52262798	2040
chr16	52294221	52294913	52294563	2586
chr16	52322205	52323406	52322852	752
chr16	52392141	52393192	52392631	1902
chr16	53405289	53406720	53406019	73
chr16	55616319	55617226	55616779	2771
chr16	57251892	57252987	57252521	1318
chr16	57281157	57282347	57281556	3315
chr16	57641308	57642298	57641968	2072
chr16	57671365	57672442	57671888	1225
chr16	57681911	57683126	57682422	1774
chr16	57690303	57691377	57690954	309
chr16	57858807	57859647	57859155	3540
chr16	58501534	58502553	58502149	2973
chr16	58511510	58513874	58512737	702
chr16	58519619	58520290	58519844	3473
chr16	58569237	58570280	58569799	1004
chr16	65829379	65830526	65829980	1337
chr16	65986934	65988204	65987645	382
chr16	65999099	66000321	65999733	391
chr16	74526596	74527721	74527166	1333
chr16	84378539	84379438	84378915	2874
chr16	84739461	84740326	84739981	2919
chr16	84972059	84972743	84972490	3357
chr16	85019248	85020242	85019784	2932
chr16	85095027	85095876	85095306	1747
chr16	85099521	85100635	85100053	2704
chr16	85150270	85152510	85151361	1893
chr16	85841902	85842906	85842412	147
chr16	85858440	85859679	85858877	3262
chr16	85983569	85984808	85984167	872
chr16	86142275	86145587	86144259	493
chr16	86453991	86454971	86454424	2079
chr16	86473586	86474415	86473901	1196
chr16	86493998	86494835	86494374	2836
chr16	86515333	86517101	86516530	392
chr16	86575174	86576403	86575901	2248
chr16	86625034	86625805	86625317	3461
chr16	87318877	87319952	87319550	1850
chr16	87756768	87757608	87757148	3231
chr16	91415337	91416242	91415885	2516
chr16	91534531	91535109	91534854	2624
chr16	91860418	91861768	91860757	2058
chr16	91962394	91963371	91962903	1319
chr16	92200830	92201641	92201224	2517
chr16	92930036	92931145	92930542	19
chr16	93263993	93265009	93264558	2610
chr16	94055272	94056333	94055872	2462
chr16	94067065	94068028	94067590	2793
chr16	94538164	94538824	94538421	2277
chr16	94731483	94732347	94731869	3263
chr16	97742728	97744096	97743561	2662
chr17	3335679	3336617	3336090	2663
chr17	3597716	3598334	3598035	2130
chr17	5764079	5764821	5764435	2231
chr17	6519703	6520611	6520178	723
chr17	8640185	8641590	8640700	828
chr17	8700681	8702060	8701265	555
chr17	8717485	8719079	8717868	1692
chr17	8747441	8748727	8748172	2059
chr17	9731066	9731969	9731420	1480
chr17	10072172	10072915	10072619	3037
chr17	10519159	10520050	10519635	1693
chr17	10583209	10584136	10583643	3038
chr17	10591059	10592212	10591771	2611
chr17	10598740	10599351	10598971	1418
chr17	12118226	12119656	12119222	860
chr17	12536343	12537511	12536721	983
chr17	12916305	12916867	12916669	2705
chr17	13806077	13806904	13806412	840
chr17	13859458	13860124	13859667	1775
chr17	14057568	14058460	14057919	361
chr17	14755974	14756949	14756225	247
chr17	14855634	14856624	14856168	196
chr17	14883016	14884798	14884289	2803
chr17	14926257	14928055	14927256	443
chr17	16130128	16131453	16130743	242
chr17	17928493	17929368	17928959	1694
chr17	21860173	21861485	21860871	1359
chr17	23811887	23812620	23812314	1737
chr17	23813214	23814377	23813921	1967
chr17	24013095	24014635	24014002	2075
chr17	25410483	25411192	25410949	1968
chr17	26787149	26788303	26787872	1176
chr17	27175135	27175922	27175551	2518
chr17	27278577	27279637	27279065	1419
chr17	27698676	27699440	27699083	2706
chr17	30130730	30131459	30131222	1819
chr17	31790519	31791597	31791038	755
chr17	31806665	31807730	31807268	1005
chr17	33920180	33920823	33920565	2104
chr17	34257824	34260024	34258284	454
chr17	34817933	34818579	34818167	3358
chr17	35834476	35835495	35835032	1565
chr17	35889015	35890349	35889951	1532
chr17	35949861	35950844	35950455	3445
chr17	35977987	35979121	35978572	955
chr17	39979593	39986246	39980315	3622
chr17	42847629	42848819	42848235	1078
chr17	42878392	42879275	42878802	1587
chr17	44724673	44726170	44725077	2103
chr17	44846333	44847505	44846938	1320
chr17	45156685	45157748	45157245	642
chr17	45170092	45171498	45170917	1839
chr17	45530910	45531878	45531365	2018
chr17	47003776	47004361	47003975	2131
chr17	47432127	47433702	47432632	897
chr17	47664081	47665118	47664652	3455
chr17	47705735	47706895	47706378	841
chr17	47893671	47894562	47894172	659
chr17	47899603	47900546	47900160	1420
chr17	48375563	48376690	48376432	2807
chr17	49763759	49764874	49763968	3264
chr17	56442786	56443749	56443327	2985
chr17	56599596	56600443	56600001	1533
chr17	58734568	58735501	58735071	2174
chr17	63030822	63031576	63031306	1499
chr17	63109898	63110956	63110638	1291
chr17	64660385	64661314	64660827	2587
chr17	64711514	64712550	64712018	1037
chr17	64993291	64994793	64993793	1155
chr17	64999759	65000804	65000255	1380
chr17	65031083	65031980	65031477	2261
chr17	65755142	65756334	65755678	703
chr17	66050423	66052360	66051677	624
chr17	67034076	67034805	67034384	612
chr17	67193191	67194001	67193620	2340
chr17	67293479	67294645	67294069	1065
chr17	67309734	67310726	67310163	2559
chr17	67462807	67463708	67463209	1924
chr17	67473277	67474207	67473745	2341
chr17	68246408	68247278	68246754	2342
chr17	68304903	68306131	68305360	3070
chr17	68512799	68513975	68513537	3587
chr17	69504117	69504967	69504550	1457
chr17	69576629	69577643	69576996	1387
chr17	70981813	70983669	70983324	333
chr17	70996038	70996793	70996228	1197
chr17	71077867	71078782	71078345	1366
chr17	71104161	71105350	71104846	2955
chr17	71267288	71268130	71267800	3071
chr17	71351566	71352473	71352107	2460
chr17	73274875	73276237	73275475	149
chr17	73338016	73338841	73338429	1646
chr17	73341299	73342545	73341981	1903
chr17	73346483	73347597	73347022	294
chr17	74160002	74161298	74160986	1588
chr17	75358405	75359613	75359063	2003
chr17	75864514	75865141	75864837	2175
chr17	79041265	79042319	79041811	1578
chr17	79123537	79124670	79124073	738
chr17	79569906	79571179	79570293	2343
chr17	79574062	79575217	79574617	1292
chr17	79704949	79706063	79705468	341
chr17	80144129	80145170	80144774	2772
chr17	80224134	80225075	80224473	3039
chr17	80234487	80236129	80235603	245
chr17	80525456	80526591	80526052	1851
chr17	80526902	80528704	80527506	39
chr17	80853573	80854477	80853956	3541
chr17	80887881	80888904	80888489	2579
chr17	81182293	81183025	81182828	3040
chr17	81195492	81196681	81196124	1606
chr17	81197402	81198320	81197870	1631
chr17	84281878	84282860	84282337	310
chr17	84378325	84379259	84378724	1500
chr17	84473546	84474741	84474326	1501
chr17	84493339	84494228	84493803	2132
chr17	84587570	84588261	84588010	2519
chr17	84655463	84656375	84655775	3149
chr17	84764853	84765688	84765164	2956
chr17	86205136	86206022	86205594	1321
chr17	86695628	86696630	86696016	1534
chr17	87501592	87502508	87502059	2612
chr17	87573231	87575160	87574118	1421
chr17	87601563	87602640	87602185	1006
chr17	87605553	87606845	87605945	2784
chr17	87625087	87626342	87625596	1388
chr17	87804494	87805570	87805117	2957
chr17	88530817	88531977	88531500	1226
chr17	88717743	88718379	88717920	2633
chr17	88724886	88726289	88725768	523
chr17	91067803	91068583	91068032	3232
chr17	91212783	91213779	91213324	1776
chr17	91214191	91215184	91214794	3515
chr18	5215522	5216635	5216143	3217
chr18	6234718	6236416	6235355	2707
chr18	6500345	6501397	6500826	1820
chr18	11756317	11757980	11757466	2811
chr18	12016593	12017392	12017010	2745
chr18	12163004	12164114	12163551	3373
chr18	12382101	12383010	12382582	2222
chr18	12391918	12393285	12392366	2073
chr18	12951129	12952371	12951530	1760
chr18	14909682	14910830	14910261	1663
chr18	15050791	15052026	15051614	821
chr18	15119413	15120120	15119744	1198
chr18	15173204	15174321	15173781	2520
chr18	15179320	15180448	15179873	829
chr18	15650416	15651712	15650934	1632
chr18	16503785	16505064	16504383	1227
chr18	16719262	16721002	16720444	426
chr18	16746660	16747715	16747166	760
chr18	16871585	16872945	16872159	506
chr18	16990520	16992140	16991557	276
chr18	17047137	17048410	17047848	349
chr18	24179196	24180692	24180296	2634
chr18	25223659	25224573	25224083	1969
chr18	25249751	25250649	25250163	672
chr18	27281611	27282850	27282208	202
chr18	27283097	27283935	27283574	1245
chr18	31606594	31607227	31606774	3140
chr18	31616349	31617189	31616727	2906
chr18	31625055	31627826	31627047	18
chr18	32033764	32035029	32034365	1260
chr18	32161011	32162004	32161493	2344
chr18	32902319	32903338	32902857	3333
chr18	32978026	32979021	32978516	2027
chr18	34008772	34009747	34009290	2920
chr18	34202394	34203644	34202892	3339
chr18	34841426	34842590	34841956	1471
chr18	35113044	35114567	35114048	3571
chr18	35204928	35205862	35205448	528
chr18	35253520	35254543	35254033	2278
chr18	35260745	35261428	35261159	3417
chr18	35346232	35347336	35346666	2041
chr18	35542886	35543940	35543500	2262
chr18	35642135	35643160	35642760	3584
chr18	35721460	35722087	35721659	3542
chr18	35982899	35983937	35983506	2133
chr18	36010321	36010961	36010711	3374
chr18	36050811	36052108	36051656	1867
chr18	36057999	36059392	36058372	3543
chr18	36488048	36489272	36488526	1228
chr18	36652011	36653390	36652520	3300
chr18	38008914	38010141	38009672	154
chr18	38043120	38043938	38043476	3474
chr18	38364724	38365792	38365257	2794
chr18	39081753	39083251	39082252	1150
chr18	39260117	39261519	39260678	393
chr18	39392304	39392983	39392601	2279
chr18	39410308	39411390	39410768	2345
chr18	42685253	42686335	42685962	2655
chr18	44631906	44633245	44632773	2635
chr18	44732786	44734746	44734417	1181
chr18	44776754	44777809	44777323	2672
chr18	45918692	45919665	45919092	1589
chr18	46632437	46633167	46632916	1512
chr18	46757508	46758509	46758211	3609
chr18	47096965	47097662	47097236	1229
chr18	49263024	49264211	49263666	3265
chr18	49546521	49547484	49547243	2395
chr18	49632531	49633752	49633154	2914
chr18	49639229	49640830	49639842	677
chr18	49693699	49695039	49694419	22
chr18	49751972	49752991	49752324	1647
chr18	54334238	54335558	54335019	501
chr18	54501959	54502570	54502250	2521
chr18	55044562	55046449	55045314	470
chr18	55061388	55063022	55061761	3287
chr18	55070667	55071673	55071154	1615
chr18	55156906	55157800	55157394	3301
chr18	55261530	55262418	55261814	2031
chr18	55355924	55356805	55356338	2042
chr18	55450919	55451643	55451192	2211
chr18	55783099	55784393	55783928	1777
chr18	56296104	56297446	56296535	1566
chr18	57300735	57302800	57301168	1390
chr18	57326922	57328181	57327360	825
chr18	57363863	57364847	57364316	2346
chr18	57372300	57373941	57372894	1367
chr18	57396120	57397296	57396700	144
chr18	57425721	57427324	57426779	1725
chr18	57430107	57431196	57430711	444
chr18	57777135	57777973	57777388	2257
chr18	59311470	59312599	59312150	696
chr18	59395009	59396063	59395564	1256
chr18	60765220	60766372	60765965	287
chr18	60772640	60773734	60773181	1561
chr18	60778926	60781062	60780319	694
chr18	60827929	60830693	60829407	125
chr18	60891628	60893272	60892723	3131
chr18	60915251	60916507	60915953	874
chr18	61388902	61390028	61389493	1381
chr18	61394909	61395634	61395271	3062
chr18	61400753	61402440	61401298	2821
chr18	61691186	61692837	61691764	1230
chr18	61693889	61694907	61694368	3204
chr18	64642185	64642939	64642382	3095
chr18	64844066	64845177	64844708	2206
chr18	64908083	64908984	64908525	1264
chr18	64910117	64911492	64910917	1164
chr18	65125106	65126067	65125594	882
chr18	65131376	65132341	65131932	885
chr18	65144514	65145821	65145053	1778
chr18	65236624	65238351	65237194	1170
chr18	65679756	65681317	65680210	649
chr18	65689805	65690751	65690228	2347
chr18	65752399	65752993	65752820	1970
chr18	65785819	65786929	65786318	3563
chr18	65857089	65857578	65857401	2804
chr18	66300369	66301942	66300954	660
chr18	67657378	67658315	67657847	2091
chr18	67728892	67729651	67729277	1971
chr18	69744994	69746000	69745448	367
chr18	70031184	70032341	70031793	3266
chr18	70300945	70301543	70301320	2875
chr18	70704176	70705710	70704992	241
chr18	70706310	70706806	70706504	2812
chr18	70723900	70724751	70724359	1904
chr18	70848767	70849722	70849188	1472
chr18	70851080	70852016	70851529	1695
chr18	70856889	70858355	70857633	233
chr18	70920625	70921553	70921088	1786
chr18	75533950	75536030	75535412	3504
chr18	75638096	75639049	75638615	2907
chr18	75652808	75653724	75653285	952
chr18	75654445	75655389	75654990	2773
chr18	75662994	75663948	75663408	2348
chr18	75687545	75688959	75688394	116
chr18	78341577	78342020	78341775	3121
chr18	80850467	80851559	80851145	3516
chr18	81495641	81496501	81495979	1038
chr18	82714544	82715647	82715110	416
chr18	82718392	82719818	82718980	804
chr18	82999546	83000202	82999774	2463
chr18	83024568	83026053	83025539	1915
chr18	84937921	84938685	84938368	3438
chr18	85076523	85077480	85076986	2986
chr18	86118802	86120119	86119374	2613
chr18	89406310	89407031	89406736	1942
chr19	4027269	4028470	4027885	159
chr19	4441614	4442583	4442035	2441
chr19	5344899	5346295	5345414	1407
chr19	5444683	5445363	5445133	1350
chr19	5809816	5810860	5810331	542
chr19	5822271	5823191	5822620	1972
chr19	5844913	5847316	5846097	205
chr19	5848210	5849086	5848642	3420
chr19	8776811	8777399	8777098	2349
chr19	8786047	8787993	8787521	1134
chr19	8924811	8925772	8925259	2636
chr19	9097236	9098335	9097721	632
chr19	9100958	9102254	9101301	2921
chr19	9106031	9106756	9106387	3517
chr19	9106853	9109662	9107141	100
chr19	9133692	9135336	9134838	480
chr19	9135353	9136471	9135806	1422
chr19	10013026	10013872	10013366	3475
chr19	10028606	10029503	10029138	311
chr19	10052530	10053810	10053004	741
chr19	10147431	10148250	10147926	1039
chr19	10317285	10317996	10317622	2134
chr19	10347804	10349215	10348715	36
chr19	10350837	10352357	10351992	2135
chr19	10353669	10355095	10354336	2614
chr19	10360365	10361617	10361018	58
chr19	12837033	12837920	12837495	3072
chr19	15654881	15655765	15655330	1798
chr19	15759455	15760171	15759938	2522
chr19	16440174	16441713	16441158	338
chr19	16445940	16446770	16446364	1642
chr19	16888934	16889795	16889268	661
chr19	17196548	17197361	17196985	2850
chr19	17330391	17332115	17331523	62
chr19	17345272	17346548	17345988	525
chr19	17835952	17837044	17836364	1880
chr19	18960269	18961699	18960819	1356
chr19	18964467	18965588	18964970	297
chr19	20467716	20469008	20468265	1648
chr19	20587659	20588797	20588313	2004
chr19	21180368	21181216	21180951	2876
chr19	21193476	21195456	21194160	312
chr19	22990936	22992209	22991729	1040
chr19	23423527	23425062	23424374	1168
chr19	23593902	23594729	23594392	3141
chr19	24246295	24247227	24246754	816
chr19	24397658	24398763	24398028	2708
chr19	24399791	24401875	24400334	3073
chr19	24481837	24482715	24482396	143
chr19	24526159	24527391	24526976	1748
chr19	24527443	24528816	24528179	1103
chr19	24578790	24580265	24579801	3153
chr19	24660797	24662386	24661440	362
chr19	24794748	24795545	24795142	1821
chr19	24886405	24887998	24887375	1563
chr19	27978757	27979908	27979257	1273
chr19	28425656	28426586	28426262	3531
chr19	29097771	29099641	29098457	3340
chr19	29311487	29312194	29311778	2896
chr19	29560666	29561560	29561194	261
chr19	29771521	29772848	29771967	1172
chr19	29777161	29778095	29777584	1502
chr19	29909656	29910913	29910101	709
chr19	29974566	29975705	29975136	2475
chr19	30170552	30171290	30171049	2774
chr19	30842419	30843705	30842926	650
chr19	33123072	33124091	33123599	1199
chr19	34625455	34626904	34626706	1779
chr19	34852308	34853174	34852808	254
chr19	38112523	38113201	38112896	2583
chr19	40358996	40359733	40359506	1360
chr19	40422346	40423093	40422793	1649
chr19	40484638	40485293	40485098	3553
chr19	40561223	40562688	40562190	1007
chr19	41529248	41530086	41529644	2350
chr19	42203540	42204961	42203737	3247
chr19	44313184	44314063	44313616	2351
chr19	44386083	44386974	44386632	1322
chr19	44462736	44463277	44463118	3462
chr19	45003097	45003993	45003597	2280
chr19	45102137	45103026	45102597	1852
chr19	46289613	46290703	46290110	2080
chr19	46407256	46407991	46407481	774
chr19	47804347	47805812	47805311	2281
chr19	47960820	47961706	47961253	2795
chr19	47964480	47965258	47965020	1973
chr19	51556404	51557567	51556926	1173
chr19	52269466	52270424	52269935	1293
chr19	53166624	53167370	53166945	775
chr19	53189383	53190385	53189829	2987
chr19	53211411	53212618	53211881	3411
chr19	53269133	53270126	53269620	3267
chr19	53356906	53357551	53357316	239
chr19	53806123	53807037	53806475	1121
chr19	53848579	53849740	53848962	2851
chr19	53874721	53875538	53875334	1822
chr19	55368489	55369802	55368836	3605
chr19	55694817	55695753	55695327	1200
chr19	57030094	57031314	57030589	1122
chr19	57273854	57274485	57274044	2709
chr19	58090604	58092010	58091391	2282
chr19	58134925	58135992	58135580	3463
chr19	60017465	60018260	60017844	3268
chr2	3665588	3666369	3666190	2988
chr2	4218949	4220585	4220021	3248
chr2	4260025	4260944	4260451	970
chr2	4381742	4382647	4382126	1056
chr2	4398139	4398966	4398540	2136
chr2	4400252	4402321	4401337	511
chr2	4475662	4476834	4476233	1503
chr2	4489596	4490623	4490121	3493
chr2	5207084	5207956	5207455	3476
chr2	6032605	6033676	6033030	1696
chr2	6133282	6134236	6133703	2755
chr2	6134253	6134925	6134439	1102
chr2	6287478	6288526	6288027	591
chr2	6576355	6577237	6576916	1458
chr2	6642610	6644017	6643397	634
chr2	6817378	6818272	6817726	937
chr2	6976953	6977871	6977365	2137
chr2	7036586	7037687	7037034	1567
chr2	11083834	11085044	11084502	141
chr2	11085505	11086809	11086022	322
chr2	12134455	12135545	12134933	2780
chr2	12177253	12178065	12177702	2005
chr2	12325784	12327355	12326826	2352
chr2	12620594	12621851	12621248	822
chr2	12630142	12631367	12630802	3205
chr2	12642032	12643129	12642692	71
chr2	13220383	13221258	13220761	3316
chr2	13306183	13308411	13307718	2099
chr2	13317862	13318747	13318373	1368
chr2	13320062	13321164	13320635	2989
chr2	13331076	13331957	13331630	2978
chr2	13418856	13419930	13419356	1486
chr2	13479713	13480603	13480148	2822
chr2	13493478	13494666	13494057	2673
chr2	13497362	13498056	13497830	3456
chr2	14029073	14029989	14029511	1323
chr2	17619484	17620701	17620135	2431
chr2	17860611	17861711	17861026	2557
chr2	20804940	20806042	20805686	3434
chr2	22850972	22852320	22851811	712
chr2	25220734	25221544	25221130	1974
chr2	25325069	25326172	25325630	1382
chr2	25604949	25605628	25605261	1294
chr2	25609800	25610730	25610406	2710
chr2	26165057	26166020	26165501	2958
chr2	26387237	26388063	26387558	2409
chr2	26389563	26391604	26391106	3435
chr2	26398425	26399509	26398923	1616
chr2	29303647	29304739	29304252	2060
chr2	29379624	29380650	29380183	704
chr2	29639569	29640644	29640185	2877
chr2	30296791	30297970	30297365	2827
chr2	30300721	30301366	30301036	891
chr2	30325964	30326622	30326314	2523
chr2	30572597	30573781	30572987	3002
chr2	30672844	30673855	30673470	3505
chr2	30678544	30679425	30679057	1459
chr2	30923636	30924533	30924090	1481
chr2	30937669	30938605	30937954	1823
chr2	31612607	31613871	31613280	1295
chr2	32414500	32415728	32415397	1535
chr2	32476649	32477427	32477139	3233
chr2	33074870	33075827	33075340	1201
chr2	33076483	33077604	33077047	613
chr2	35070546	35071605	35070846	2813
chr2	35333626	35334857	35334287	692
chr2	35512808	35513615	35513129	909
chr2	35745006	35745843	35745492	2243
chr2	35754049	35754888	35754353	1041
chr2	38140525	38141276	38140938	3003
chr2	38370788	38371982	38371194	1936
chr2	38386159	38387045	38386498	2165
chr2	38390314	38392225	38391537	811
chr2	43959759	43960972	43960385	2781
chr2	44073547	44074552	44074099	2599
chr2	44077169	44078866	44077761	8
chr2	44381580	44382529	44382117	1697
chr2	44485462	44486566	44485992	1477
chr2	45143897	45144787	45144338	2244
chr2	45211671	45213247	45212332	6
chr2	46507760	46508952	46508292	59
chr2	46510866	46512158	46511427	1664
chr2	46520838	46523151	46522196	2074
chr2	50319083	50320114	50319843	3206
chr2	50994842	50995912	50995274	476
chr2	51160631	51161641	51161201	2197
chr2	51363483	51364465	51363968	1237
chr2	52127531	52129487	52128787	529
chr2	52477926	52479948	52479193	107
chr2	52721544	52722450	52722039	2664
chr2	52725031	52725694	52725215	3592
chr2	52808740	52809839	52809433	3142
chr2	52823080	52824258	52823713	986
chr2	52841534	52842635	52842114	875
chr2	52846694	52847925	52847144	685
chr2	52861484	52862361	52861933	1698
chr2	52907985	52908944	52908443	3249
chr2	57660012	57661030	57660482	1617
chr2	58357900	58358543	58358158	3544
chr2	58426202	58427158	58426607	2223
chr2	59082310	59083564	59082914	494
chr2	59220333	59221363	59220799	521
chr2	59245108	59246349	59245905	217
chr2	59508080	59508858	59508521	1042
chr2	59588807	59589562	59589265	1824
chr2	60634073	60635929	60635172	2637
chr2	60824058	60825085	60824569	2936
chr2	60896493	60897531	60897103	2100
chr2	63543811	63544954	63544565	411
chr2	64163460	64164286	64163741	1975
chr2	64232274	64233795	64232733	1081
chr2	65060919	65061884	65061432	2979
chr2	65756172	65757325	65756878	1351
chr2	68088017	68088801	68088298	2353
chr2	68822145	68823929	68822727	910
chr2	71312011	71312960	71312570	2859
chr2	71481857	71483058	71482346	2524
chr2	71604599	71605640	71605092	481
chr2	71893966	71895231	71894426	347
chr2	71963447	71964625	71964056	507
chr2	71995230	71996066	71995734	1043
chr2	72313726	72314642	72314111	1930
chr2	72526717	72527897	72527287	387
chr2	72664887	72665976	72665497	911
chr2	72843628	72844293	72844073	2959
chr2	75520575	75521991	75521131	687
chr2	75541036	75542016	75541507	2066
chr2	75601172	75601865	75601591	1738
chr2	75639507	75640722	75640279	1976
chr2	75955042	75956156	75955494	1881
chr2	76169885	76170914	76170379	1135
chr2	76341951	76342771	76342298	3074
chr2	77073750	77074691	77074504	3041
chr2	78380075	78381109	78380760	1977
chr2	78878418	78879493	78878940	830
chr2	79053915	79054833	79054421	2682
chr2	79090276	79091367	79090859	1436
chr2	79109064	79109997	79109554	3011
chr2	79638489	79639424	79639059	1101
chr2	80345865	80347077	80346406	87
chr2	80436671	80437761	80437214	589
chr2	80527851	80529078	80528552	334
chr2	83522155	83523140	83522565	1853
chr2	84384520	84386132	84385095	1238
chr2	84389539	84390478	84390125	3296
chr2	84474262	84476451	84475905	2232
chr2	84792087	84793108	84792612	2775
chr2	90325818	90327033	90326520	1905
chr2	90349165	90350029	90349570	2525
chr2	90372969	90374735	90374323	3439
chr2	90376627	90377940	90377439	2908
chr2	90404999	90406780	90406178	2212
chr2	90952249	90953341	90952894	400
chr2	91226280	91227665	91226953	1246
chr2	94758710	94760280	94759748	188
chr2	94823380	94824354	94823796	1082
chr2	101823153	101824331	101823870	1601
chr2	102712634	102714402	102713525	134
chr2	103479700	103480852	103480317	3269
chr2	107452114	107453399	107452509	2019
chr2	108667137	108668471	108667640	191
chr2	109805784	109806924	109806463	2224
chr2	113188786	113189458	113189271	939
chr2	113203743	113204674	113204077	3012
chr2	113234773	113235695	113235239	1385
chr2	113237807	113238965	113238517	1451
chr2	113244349	113245521	113244875	394
chr2	113412621	113413981	113413432	3509
chr2	113461582	113462641	113462223	2638
chr2	113478926	113481818	113479567	767
chr2	113529527	113530435	113530069	1536
chr2	113620485	113621607	113621061	3085
chr2	115118519	115119606	115118970	1156
chr2	115483334	115484286	115483804	1799
chr2	115484308	115484855	115484544	2354
chr2	115586615	115587507	115587002	1898
chr2	115605611	115606783	115606425	352
chr2	116014846	116015890	116015455	43
chr2	116801024	116802163	116801465	582
[truncated: 1,623 more rows]

## Sheet: S5. H3K4me1 Peaks
chr	start	end	summit	rank
chr1	3780450	3780849	3780657	36720
chr1	3892450	3892549	3892547	56003
chr1	3893900	3894449	3893912	44981
chr1	4774450	4774799	4774502	24028
chr1	4798900	4799099	4798902	53315
chr1	4849550	4849749	4849672	53691
chr1	4864250	4864549	4864352	47930
chr1	4864800	4865149	4865002	26614
chr1	5008800	5008949	5008917	52685
chr1	5247900	5248249	5248132	48163
chr1	6203350	6203649	6203352	26809
chr1	6205800	6205999	6205997	49839
chr1	6206550	6206849	6206772	28660
chr1	6857100	6857499	6857302	44078
chr1	7077850	7078199	7078157	39184
chr1	7080250	7080749	7080417	37017
chr1	7370750	7371499	7371052	37281
chr1	8734550	8734699	8734642	49859
chr1	8735350	8735449	8735427	59866
chr1	9190350	9190599	9190352	27164
chr1	9538550	9539049	9538687	25066
chr1	9554550	9554699	9554552	56333
chr1	9602300	9602499	9602377	47791
chr1	9689450	9689699	9689697	41807
chr1	9736400	9736599	9736462	52644
chr1	9737050	9737399	9737142	40857
chr1	9763550	9763849	9763742	50324
chr1	9777500	9777749	9777507	38904
chr1	9786300	9786749	9786482	16883
chr1	9789900	9790299	9790117	40577
chr1	9805200	9805499	9805402	36788
chr1	9806800	9807649	9807142	3309
chr1	9814000	9814149	9814102	53022
chr1	9828450	9829299	9828897	29635
chr1	9829750	9830049	9829752	47047
chr1	9842850	9843349	9843027	29346
chr1	10026600	10026849	10026807	46061
chr1	10030550	10030949	10030742	39367
chr1	10223850	10224049	10224017	31278
chr1	10246550	10247049	10246632	28036
chr1	10251500	10251599	10251587	57641
chr1	10290400	10290899	10290837	32526
chr1	10495550	10495749	10495552	53635
chr1	10496000	10496249	10496017	47688
chr1	10560350	10561099	10560862	26857
chr1	10561600	10562049	10561807	27364
chr1	10573900	10574399	10573992	27063
chr1	10576850	10577099	10576982	43864
chr1	10581000	10583299	10581977	9087
chr1	10613250	10613549	10613487	34968
chr1	10710400	10710599	10710512	48459
chr1	10760950	10761649	10761612	22188
chr1	10762000	10762199	10762192	50767
chr1	10762850	10763849	10763217	10036
chr1	10766950	10767949	10767552	14062
chr1	10768650	10769999	10769582	2870
chr1	10773350	10773799	10773612	41369
chr1	10773950	10774649	10774342	22467
chr1	10783200	10783849	10783567	12067
chr1	10784750	10786899	10786132	7389
chr1	10787350	10788099	10787827	16801
chr1	10823200	10823849	10823412	30194
chr1	10826650	10827349	10827232	28777
chr1	10827600	10827899	10827707	33071
chr1	10836150	10836249	10836152	54559
chr1	10862550	10862799	10862617	46822
chr1	10868300	10868599	10868377	38753
chr1	10888400	10888849	10888672	22847
chr1	10889000	10889599	10889337	25216
chr1	10895300	10895449	10895352	44685
chr1	10896000	10896149	10896002	48628
chr1	11320300	11320399	11320392	57664
chr1	11990600	11990849	11990602	55590
chr1	12388000	12388599	12388087	5827
chr1	12388900	12389049	12389047	55306
chr1	12562500	12563299	12562687	796
chr1	12725000	12725149	12725142	53767
chr1	13152150	13152549	13152162	44621
chr1	13160650	13160799	13160797	57294
chr1	13161550	13161999	13161762	16463
chr1	13178450	13178549	13178452	55439
chr1	13289750	13290499	13290097	24300
chr1	13322600	13323349	13322837	20519
chr1	13351750	13353049	13352342	14129
chr1	13361150	13361349	13361322	51158
chr1	13522750	13523399	13522957	12984
chr1	13575500	13576099	13576002	28653
chr1	13576600	13576799	13576782	52107
chr1	13577400	13578049	13577417	15463
chr1	13589350	13589749	13589697	50708
chr1	13648300	13649399	13649117	28046
chr1	13704550	13705249	13705052	36441
chr1	13706200	13706599	13706452	42650
chr1	13742050	13742549	13742362	15887
chr1	13743000	13743399	13743147	36029
chr1	13743750	13743899	13743897	52331
chr1	13850900	13851099	13850902	47569
chr1	13851650	13851899	13851742	48696
chr1	13991650	13991849	13991827	50485
chr1	13992150	13992649	13992407	18137
chr1	14000500	14000949	14000677	28817
chr1	14042800	14043349	14043117	27687
chr1	14043850	14044149	14043907	43909
chr1	14110850	14111499	14111112	33871
chr1	14152600	14152699	14152602	40334
chr1	14169650	14170549	14170252	20071
chr1	14170950	14172849	14171212	16
chr1	14176800	14177849	14177722	18239
chr1	14178150	14178499	14178202	35202
chr1	14202100	14202449	14202307	34344
chr1	14222300	14222899	14222817	30827
chr1	14223550	14223799	14223557	42294
chr1	14262250	14263799	14263092	2982
chr1	14264450	14266949	14264652	2668
chr1	14267300	14267549	14267477	53024
chr1	14268850	14269249	14269017	41039
chr1	14275800	14277499	14276417	661
chr1	14277900	14282149	14281077	4735
chr1	14282850	14288149	14283732	1311
chr1	14288550	14290149	14289837	5512
chr1	14552350	14553049	14552767	10708
chr1	15797300	15797549	15797427	41083
chr1	15925650	15926349	15925947	17998
chr1	15927050	15927649	15927237	28548
chr1	15983450	15984249	15983542	43814
chr1	16093150	16093349	16093152	56735
chr1	16096550	16097399	16097202	16313
chr1	16105800	16105999	16105867	53087
chr1	16111850	16112799	16112532	6917
chr1	16113500	16114099	16113717	2576
chr1	16125300	16125499	16125427	43350
chr1	16191750	16192299	16192047	38018
chr1	16192400	16192949	16192857	11069
chr1	16202900	16203399	16202912	37697
chr1	16206200	16206599	16206402	25398
chr1	16207050	16207149	16207112	59697
chr1	16389100	16389549	16389522	14268
chr1	16530400	16530699	16530402	27109
chr1	16531200	16531599	16531452	37918
chr1	16597250	16597799	16597252	36628
chr1	16607250	16607599	16607362	44698
chr1	16623500	16623749	16623502	43087
chr1	16624400	16624599	16624532	55048
chr1	16628000	16628249	16628017	50544
chr1	16644900	16645049	16644997	53088
chr1	16645250	16645799	16645777	45529
chr1	16656400	16656749	16656452	25527
chr1	16677500	16677649	16677612	53245
chr1	19940650	19940899	19940687	51126
chr1	19941800	19942449	19941882	3455
chr1	19963800	19964199	19963862	28786
chr1	19964550	19964999	19964772	27268
chr1	20057850	20058399	20057922	33026
chr1	20058900	20059149	20059147	33644
chr1	20060200	20060349	20060252	54911
chr1	20277250	20277499	20277407	39931
chr1	20293400	20293949	20293572	18394
chr1	20301100	20301549	20301472	37502
chr1	20334250	20334499	20334332	44805
chr1	20440600	20440799	20440627	53211
chr1	20808650	20808849	20808652	51741
chr1	20940850	20941249	20941137	32014
chr1	20979550	20980099	20980042	19190
chr1	20987750	20988099	20988097	43071
chr1	20998300	20998799	20998537	25578
chr1	20999300	20999649	20999357	32514
chr1	21004050	21004699	21004367	18150
chr1	21004950	21005749	21005142	25739
chr1	21023250	21024199	21023532	12923
chr1	21024450	21024749	21024602	43284
chr1	21030300	21031399	21031282	28679
chr1	21032950	21033449	21033342	26435
chr1	21042300	21042749	21042437	35392
chr1	21043250	21043849	21043432	14521
chr1	21059750	21060499	21060127	12644
chr1	21061700	21061799	21061717	58689
chr1	21066700	21066949	21066702	38344
chr1	21067400	21067549	21067492	56046
chr1	21067950	21068199	21067992	51032
chr1	21079500	21080849	21080727	29409
chr1	21084650	21085099	21084747	29194
chr1	21490350	21490499	21490352	46225
chr1	22365000	22365299	22365262	35996
chr1	22620900	22621049	22620902	51911
chr1	23118900	23119949	23119512	28882
chr1	23123950	23124299	23124237	31995
chr1	23124850	23125249	23124912	41642
chr1	23180100	23180799	23180627	33570
chr1	23184700	23185399	23184927	23317
chr1	23195750	23195949	23195937	53283
chr1	23196050	23197299	23196867	27003
chr1	23197900	23198299	23197922	49454
chr1	23208600	23208949	23208812	52608
chr1	23210250	23210999	23210662	13481
chr1	23213450	23213549	23213527	59913
chr1	23215600	23215799	23215602	48864
chr1	23222950	23223299	23222952	40655
chr1	23226950	23227249	23226952	26016
chr1	23227300	23228249	23227662	22751
chr1	23228800	23229149	23229057	40627
chr1	23235300	23235499	23235492	49307
chr1	23266850	23267549	23267337	24463
chr1	23267900	23268599	23268262	12309
chr1	23269500	23269799	23269577	39532
chr1	23270350	23271849	23270712	22154
chr1	23272150	23272799	23272462	10513
chr1	23273450	23274249	23273657	3278
chr1	23274550	23275099	23274702	20948
chr1	23276500	23277699	23277457	21424
chr1	23280800	23281449	23280937	3249
chr1	23282950	23283049	23283042	53101
chr1	23498100	23498399	23498267	49287
chr1	23553100	23553449	23553297	7496
chr1	23874100	23874949	23874142	25208
chr1	23898850	23899199	23898857	27686
chr1	23899600	23900399	23899637	28551
chr1	23918050	23918149	23918147	59528
chr1	23918350	23919699	23919492	14122
chr1	23920200	23920849	23920257	24710
chr1	23927400	23927849	23927672	12450
chr1	24017150	24017249	24017152	57228
chr1	24202850	24204149	24203312	2511
chr1	24219200	24219999	24219537	11733
chr1	24232000	24232249	24232167	49390
chr1	24233000	24233299	24233252	40960
chr1	24234000	24234549	24234332	49618
chr1	24237650	24237849	24237797	33326
chr1	24423250	24423549	24423437	38497
chr1	24424300	24424449	24424402	54569
chr1	24686350	24686699	24686462	29741
chr1	28102300	28102799	28102537	39135
chr1	28790350	28790849	28790502	17660
chr1	29513500	29513799	29513617	30996
chr1	30924600	30924799	30924777	45309
chr1	30928600	30929099	30929047	31695
chr1	30932850	30932949	30932882	53399
chr1	30955300	30955749	30955417	43416
chr1	31004150	31004249	31004232	52908
chr1	33478500	33478999	33478682	26213
chr1	33514550	33514749	33514747	58479
chr1	33586900	33587149	33587147	42125
chr1	33812800	33812949	33812942	44525
chr1	33813550	33813949	33813777	27074
chr1	33849400	33849999	33849892	29897
chr1	33850350	33851399	33850492	465
chr1	33869700	33870149	33869942	41451
chr1	33953800	33954499	33954272	30638
chr1	33955650	33955999	33955892	39798
chr1	33956350	33956549	33956392	55133
chr1	33959050	33960149	33960007	27706
chr1	33962600	33962849	33962847	52528
chr1	33968700	33968999	33968772	33167
chr1	33992700	33993599	33993152	11355
chr1	33997700	33997899	33997857	37278
chr1	34023800	34024199	34024042	46679
chr1	34061100	34061899	34061707	42945
chr1	34064500	34064949	34064822	44356
chr1	34066400	34067749	34067272	25752
chr1	34069300	34069999	34069482	39723
chr1	34070500	34070749	34070627	28916
chr1	34074550	34075749	34075522	6656
chr1	34076150	34077299	34076397	16629
chr1	34078150	34079549	34078527	22663
chr1	34082950	34083499	34083147	32577
chr1	34083850	34084099	34083857	43989
chr1	34097500	34097699	34097527	51861
chr1	34097850	34097999	34097872	54900
chr1	34098100	34098449	34098277	37126
chr1	34099000	34099599	34099282	5116
chr1	34100200	34100749	34100572	24744
chr1	34100950	34101749	34101177	31601
chr1	34101850	34104149	34103452	860
chr1	34104700	34105599	34105032	2797
chr1	34109550	34109799	34109787	31495
chr1	34110600	34110699	34110622	54015
chr1	34116900	34117299	34117217	38684
chr1	34117600	34117799	34117707	50650
chr1	34159450	34159599	34159577	56290
chr1	34162950	34163199	34163072	39594
chr1	34166350	34169699	34167592	12384
chr1	34176900	34177449	34177157	21297
chr1	34178950	34180149	34180077	12615
chr1	34195200	34195949	34195572	30552
chr1	34196350	34197049	34196642	6994
chr1	34197550	34197749	34197737	57732
chr1	34197850	34197949	34197852	58956
chr1	34206650	34207349	34207087	3208
chr1	34208250	34208349	34208257	56601
chr1	34211300	34211599	34211482	48963
chr1	34212400	34212599	34212462	49912
chr1	34241050	34241749	34241052	44037
chr1	34245600	34245799	34245612	52447
chr1	34446200	34446299	34446207	58632
chr1	34447050	34447399	34447112	23657
chr1	34497600	34498149	34497772	13009
chr1	34517000	34517149	34517077	59141
chr1	34858200	34858349	34858207	57615
chr1	34886150	34888149	34887052	14118
chr1	34898100	34898399	34898262	49531
chr1	34906300	34906549	34906337	41720
chr1	35437550	35437799	35437617	36480
chr1	35525350	35525999	35525847	37565
chr1	35770400	35770599	35770592	49272
chr1	35771250	35772199	35771627	9652
chr1	36073350	36074849	36074462	16931
chr1	36086800	36087099	36087012	47064
chr1	36087550	36088149	36087897	2844
chr1	36126500	36126749	36126612	52182
chr1	36129500	36129899	36129787	35011
chr1	36147000	36147349	36147152	48966
chr1	36185450	36186349	36185872	3873
chr1	36186850	36187649	36187642	12681
chr1	36230000	36231249	36231222	2601
chr1	36256600	36258199	36257702	2021
chr1	36320700	36320799	36320797	56098
chr1	36366850	36367599	36367072	15149
chr1	36368000	36368149	36368002	46467
chr1	36380150	36380499	36380482	33890
chr1	36382250	36382699	36382697	37208
chr1	36383550	36384199	36384197	6956
chr1	36384800	36384899	36384807	51718
chr1	36389900	36390049	36389982	56765
chr1	36390450	36390899	36390667	7058
chr1	36513900	36514399	36514062	28596
chr1	36527350	36527699	36527357	49697
chr1	36529150	36530749	36529692	14863
chr1	36531050	36531549	36531237	38571
chr1	36531700	36532299	36532187	43826
chr1	36532700	36533099	36532827	33401
chr1	36540800	36541699	36541047	14013
chr1	36547850	36548149	36548122	45879
chr1	36548600	36549149	36549002	20910
chr1	36549700	36549999	36549702	44568
chr1	36552250	36552749	36552452	17896
chr1	36573000	36573149	36573002	54484
chr1	36574600	36575799	36574862	1269
chr1	36593300	36593449	36593447	54636
chr1	36595350	36596099	36595782	6145
chr1	36596400	36596899	36596597	34505
chr1	36602300	36602849	36602452	23050
chr1	36604450	36605149	36604572	1577
chr1	36612000	36612699	36612302	18198
chr1	36615800	36617449	36615967	15223
chr1	36619700	36619899	36619882	39065
chr1	36620350	36620499	36620407	54618
chr1	36621250	36621499	36621262	39161
chr1	36622800	36623999	36623282	21075
chr1	36625850	36626449	36626122	21275
chr1	36627000	36627299	36627027	34931
chr1	36628700	36629199	36628857	37830
chr1	36637000	36637199	36637172	47996
chr1	36645000	36645949	36645192	29893
chr1	36646100	36648599	36647247	3880
chr1	36652500	36652899	36652877	37242
chr1	36653350	36654199	36653922	17850
chr1	36683400	36683649	36683597	50660
chr1	36684050	36685549	36684912	7788
chr1	36685800	36694849	36694122	105
chr1	36695100	36698099	36695472	801
chr1	36701750	36702899	36702707	564
chr1	36703350	36705249	36703802	5360
chr1	36713750	36714249	36714077	12907
chr1	36721750	36721849	36721752	59363
chr1	36724850	36725149	36725117	32370
chr1	36727150	36727849	36727477	38697
chr1	36729050	36729599	36729422	7345
chr1	36730100	36730299	36730297	56395
chr1	36753650	36754049	36753827	37707
chr1	36765250	36765549	36765522	43723
chr1	36779400	36779499	36779442	57647
chr1	36879400	36880049	36879597	18014
chr1	36887400	36887849	36887692	8178
chr1	36917600	36918399	36918012	24644
chr1	36993750	36994049	36993962	28210
chr1	36994700	36995399	36995022	13164
chr1	37375050	37375449	37375447	51460
chr1	37406650	37407699	37407417	787
chr1	37408000	37408799	37408317	2350
chr1	37462150	37462349	37462187	52202
chr1	37485600	37485999	37485612	26648
chr1	37487750	37488499	37488052	37338
chr1	37553200	37553749	37553512	32612
chr1	37591700	37592099	37591927	39206
chr1	37594900	37595349	37595292	34666
chr1	37596700	37597099	37596942	26780
chr1	37622700	37623299	37623052	40899
chr1	37688250	37688499	37688497	45445
chr1	37927850	37928149	37928082	30018
chr1	37948050	37948649	37948322	15541
chr1	37979050	37979249	37979162	47333
chr1	38005850	38006449	38005987	22105
chr1	38007100	38007499	38007307	45186
chr1	38007750	38008699	38008257	11138
chr1	38011100	38011599	38011377	25431
chr1	38012050	38012349	38012132	40811
chr1	38013450	38013949	38013452	42339
chr1	38028400	38029499	38029287	5019
chr1	38034050	38034449	38034307	27486
chr1	38052850	38053049	38053047	57411
chr1	38063500	38063599	38063527	54592
chr1	38068850	38069049	38068852	54162
chr1	38069450	38069999	38069597	20028
chr1	38095850	38096449	38096232	23286
chr1	38137450	38138299	38137992	22167
chr1	38138350	38138899	38138697	42255
chr1	38184550	38184649	38184627	56463
chr1	38185300	38185449	38185307	50278
chr1	38286000	38286949	38286532	23815
chr1	38288800	38288949	38288947	51951
chr1	38289400	38289749	38289512	48759
chr1	38289950	38290199	38290042	46294
chr1	38316400	38317499	38317127	12234
chr1	38317950	38319249	38319027	17289
chr1	38319450	38320249	38319857	8271
chr1	38320350	38321099	38320587	39299
chr1	38343100	38343249	38343232	52028
chr1	38343750	38344199	38343902	35760
chr1	38349200	38350199	38349412	31625
chr1	38364150	38365049	38364647	12331
chr1	38365400	38366099	38365457	29578
chr1	38449150	38449949	38449782	8871
chr1	38450700	38451249	38451002	32028
chr1	38451700	38452049	38451782	30137
chr1	38452450	38455149	38452942	6354
chr1	38455550	38456099	38455762	38720
chr1	38456750	38458549	38457747	2448
chr1	38459100	38461249	38459552	542
chr1	38467250	38467649	38467487	26389
chr1	38469400	38469899	38469797	36098
chr1	38470300	38470449	38470317	49573
chr1	38473300	38473449	38473402	58161
chr1	38477650	38478149	38477927	20811
chr1	38481150	38482599	38481872	11920
chr1	38482800	38483649	38483122	8107
chr1	38484050	38485199	38484707	10168
chr1	38492750	38493449	38492922	6066
chr1	38493600	38495699	38495077	680
chr1	38495950	38497349	38496307	17676
chr1	38498000	38498199	38498017	51296
chr1	38498300	38499449	38498422	14602
chr1	38505650	38507549	38506792	3161
chr1	38508200	38508549	38508367	57025
chr1	38514800	38515599	38515137	21780
chr1	38519350	38519799	38519562	25938
chr1	38520850	38521199	38521127	40168
chr1	38526800	38527149	38526997	24100
chr1	38527500	38527799	38527682	52617
chr1	38527950	38528299	38527967	34925
chr1	38531400	38532399	38532187	8167
chr1	38533100	38533849	38533467	4957
chr1	38544550	38544999	38544927	33127
chr1	38604850	38605199	38605132	47112
chr1	38605750	38606199	38605897	39126
chr1	38609450	38609899	38609702	30311
chr1	38610300	38610499	38610487	58093
chr1	38614150	38614349	38614287	50742
chr1	38618400	38619599	38619002	28978
chr1	38620150	38620349	38620172	54765
chr1	38620400	38620749	38620467	37037
chr1	38661500	38662099	38661752	36990
chr1	38662250	38663899	38663152	2783
chr1	38664200	38664849	38664467	35837
chr1	38665250	38667599	38666857	2082
chr1	38668300	38668999	38668737	9682
chr1	38669350	38670649	38669912	24031
chr1	38672650	38673049	38672807	38951
chr1	38681150	38682049	38681927	29956
chr1	38698950	38699649	38699577	21860
chr1	38737550	38737699	38737587	55475
chr1	38738200	38738399	38738257	40535
chr1	38752300	38753049	38752837	27840
chr1	38757000	38758349	38758097	10752
chr1	38806300	38806549	38806502	47717
chr1	38833850	38834299	38834252	23818
chr1	38843400	38843999	38843712	22374
chr1	38847600	38848149	38848147	37483
chr1	38848650	38848849	38848692	55956
chr1	39250050	39250149	39250087	45197
chr1	39338900	39339299	39338987	16049
chr1	39364300	39364699	39364412	41562
chr1	39405900	39406199	39406092	33994
chr1	39423700	39424149	39423907	44184
chr1	39426300	39426599	39426487	43330
chr1	39585250	39585699	39585422	44586
chr1	39586200	39586799	39586422	18633
chr1	39594450	39594699	39594452	52499
chr1	39602400	39603649	39603002	9014
chr1	39607850	39607999	39607942	56037
chr1	39609700	39610199	39609952	21025
chr1	39610350	39612599	39610602	7435
chr1	39613300	39614299	39613637	15515
chr1	39631250	39632449	39631757	19982
chr1	39683600	39684099	39683602	47079
chr1	39692350	39692849	39692662	17007
chr1	39693750	39694199	39693987	32892
chr1	39703000	39703099	39703042	58678
chr1	39703700	39704149	39703822	12627
chr1	39743200	39743349	39743302	55659
chr1	39743900	39744349	39744317	10820
chr1	39748300	39748499	39748407	39840
chr1	39748850	39749099	39748867	40029
chr1	39751300	39752599	39752352	9448
chr1	39753400	39755249	39753717	7406
chr1	39755750	39757549	39756262	14218
chr1	39771300	39771549	39771507	49283
chr1	39773300	39773749	39773702	39390
chr1	39775350	39776149	39775737	21381
chr1	39786950	39787999	39787552	10798
chr1	39792100	39792749	39792522	20276
chr1	39793450	39793799	39793682	37206
chr1	39797150	39798199	39797812	32970
chr1	39798450	39798949	39798757	38682
chr1	39803300	39803699	39803407	54445
chr1	39806200	39807199	39806417	25075
chr1	39810050	39810199	39810197	55471
chr1	39811900	39812749	39812282	13906
chr1	39814700	39815199	39814887	5081
chr1	39815500	39816349	39815842	5445
chr1	39816800	39817449	39817142	11852
chr1	39818050	39818149	39818052	59661
chr1	39819250	39819549	39819367	42068
chr1	39854000	39854249	39854117	50896
chr1	39855300	39855599	39855437	46570
chr1	39862050	39862499	39862352	29545
chr1	39862850	39863049	39862942	44504
chr1	39895400	39895649	39895472	36974
chr1	39896200	39896949	39896622	33123
chr1	39945000	39945599	39945237	25830
chr1	39946050	39946199	39946052	51478
chr1	39960300	39961599	39960697	9044
chr1	39969800	39970449	39970242	26157
chr1	39974600	39975899	39975757	16933
chr1	39977650	39977899	39977707	42334
chr1	39978500	39980049	39979082	4962
chr1	39980450	39981049	39981047	24481
chr1	39981500	39982599	39981942	3719
chr1	39987150	39987249	39987182	56949
chr1	39987300	39987849	39987717	36799
chr1	39988500	39989149	39989042	6472
chr1	39989400	39989799	39989482	34404
chr1	39990400	39991299	39990517	14914
chr1	39991950	39992449	39992182	31632
chr1	39993750	39994149	39993927	24129
chr1	39996750	39998699	39997607	1998
chr1	39999250	40000099	39999622	32250
chr1	40000150	40003399	40000667	1189
chr1	40004050	40004649	40004172	16986
chr1	40004950	40007099	40005407	741
chr1	40007300	40007649	40007342	34029
chr1	40011750	40011899	40011887	55289
chr1	40012600	40013099	40012817	29494
chr1	40013200	40013799	40013487	4961
chr1	40017350	40017749	40017657	30464
chr1	40041200	40041799	40041587	4783
chr1	40042250	40042349	40042327	55888
chr1	40090200	40090599	40090577	42846
chr1	40091450	40091749	40091497	14544
chr1	40571700	40571849	40571812	52466
chr1	40903850	40904049	40904017	46932
chr1	41869350	41869699	41869417	53042
chr1	42552250	42552649	42552587	43960
chr1	42770400	42770499	42770492	58759
chr1	42939250	42939649	42939377	29042
chr1	43149950	43150499	43150317	13797
chr1	43156550	43156749	43156602	59019
chr1	43184350	43184699	43184472	41611
chr1	43185700	43186199	43185977	9584
chr1	43225450	43225799	43225692	27765
chr1	43275400	43275849	43275422	35139
chr1	43282050	43282299	43282062	43719
chr1	43394500	43394999	43394922	38352
chr1	43395650	43395849	43395652	44439
chr1	43415250	43416049	43415712	13810
chr1	43416100	43417649	43417367	2919
chr1	43417850	43418249	43418112	32303
chr1	43504050	43504549	43504302	23624
chr1	43510500	43510749	43510747	29731
chr1	43520300	43520699	43520457	29608
chr1	43521500	43521599	43521502	55123
chr1	43522600	43522749	43522617	48148
chr1	43524100	43525499	43524307	1314
chr1	43530800	43532249	43531802	9574
chr1	43539200	43540249	43539767	6123
chr1	43540650	43542199	43540957	11704
chr1	43549500	43550449	43550097	5887
chr1	43551000	43551349	43551062	35634
chr1	43560000	43560899	43560387	13147
chr1	43561550	43562099	43561682	29899
chr1	43596450	43597399	43596652	21662
chr1	43604550	43605749	43605277	6980
chr1	43605900	43606699	43606327	14995
chr1	43623250	43623349	43623337	55596
chr1	43640100	43640449	43640242	20960
chr1	43640900	43641399	43641027	29788
chr1	43673300	43674549	43673722	15116
chr1	43755200	43756099	43755882	25015
chr1	43770900	43772899	43771467	5578
chr1	43779050	43779349	43779257	23020
chr1	43789000	43789549	43789367	27098
chr1	43789700	43790449	43790207	4012
chr1	43824700	43825849	43824962	10528
chr1	43837600	43838749	43838462	21274
chr1	43842750	43843049	43842847	32925
chr1	43875100	43876799	43875817	3276
chr1	43878650	43878799	43878652	59517
chr1	43879400	43879799	43879617	31130
chr1	43993000	43993099	43993032	59265
chr1	44100450	44100549	44100452	58005
chr1	44156700	44156949	44156752	48722
chr1	44205950	44206199	44206117	43469
chr1	44562500	44562849	44562737	40600
chr1	44610900	44611549	44611162	15295
chr1	44611950	44612349	44611957	40081
chr1	44623750	44624399	44624062	4120
chr1	44624650	44625599	44625087	17917
chr1	44631850	44632199	44632187	36841
chr1	44633350	44633699	44633572	33681
chr1	44637350	44637649	44637512	55523
chr1	44639350	44639699	44639592	43738
chr1	44640700	44641549	44640927	10172
chr1	44642500	44643999	44643237	10289
chr1	44644350	44644449	44644447	56144
chr1	44645050	44645249	44645052	52343
chr1	44645750	44645949	44645942	54106
chr1	44646150	44648499	44646357	437
chr1	44649600	44650849	44650407	6381
chr1	44667450	44668149	44667452	44004
chr1	44680950	44681599	44681537	25975
chr1	44682250	44682349	44682342	56067
chr1	44683100	44683849	44683277	37461
chr1	44690600	44691299	44690617	45575
chr1	44717700	44717949	44717782	43581
chr1	44841450	44842099	44841902	23384
chr1	44842900	44843799	44843377	23139
chr1	45560850	45561199	45561102	25206
chr1	45561950	45562499	45562017	24045
chr1	45853500	45853849	45853557	37237
chr1	45883200	45883899	45883582	17267
chr1	45884000	45884449	45884117	48047
chr1	45893950	45894399	45894212	16302
chr1	45895100	45895599	45895212	37429
chr1	45909500	45909699	45909697	47572
chr1	45910250	45910549	45910352	14511
chr1	45915350	45915799	45915672	45237
chr1	45916300	45916849	45916742	13418
chr1	45917600	45918449	45917897	12482
chr1	45920850	45921899	45921562	33810
chr1	45949500	45949849	45949622	47265
chr1	45961500	45961949	45961702	30411
chr1	45962550	45962899	45962767	25371
chr1	45983850	45984149	45984147	56008
chr1	46041350	46041749	46041677	29493
chr1	46908750	46908949	46908757	47969
chr1	46920250	46920699	46920352	43744
chr1	46942800	46942949	46942942	48201
chr1	50826650	50826999	50826732	35261
chr1	51091000	51091399	51091117	28851
chr1	51091700	51092049	51091877	21563
chr1	51132700	51133249	51132892	35918
chr1	51133500	51133599	51133592	57388
chr1	51147750	51148399	51147997	866
chr1	51153100	51154599	51153657	5030
chr1	51155400	51156149	51156052	25442
chr1	51157150	51157399	51157157	37806
chr1	51161750	51161949	51161807	48333
chr1	51183950	51184399	51184357	20687
chr1	51193750	51193849	51193847	55360
chr1	51201800	51202149	51202042	49559
chr1	51203050	51203349	51203297	40390
chr1	51208250	51209349	51209232	27549
chr1	51321650	51323099	51321797	18619
chr1	51324000	51324649	51324472	26174
chr1	51336100	51336949	51336727	35833
chr1	51348600	51349999	51349027	21088
chr1	51354750	51355149	51354832	35286
chr1	51362950	51363749	51363192	3932
chr1	51363950	51364049	51364002	59290
chr1	51364200	51364449	51364202	47835
chr1	51365200	51365449	51365397	45117
chr1	51530700	51531499	51530962	1847
chr1	51536250	51536349	51536327	57988
chr1	51543200	51543399	51543362	55079
chr1	51545450	51547399	51546437	16196
chr1	51549700	51550399	51550307	6723
chr1	51551000	51552099	51551852	1994
chr1	51555700	51555999	51555717	47062
chr1	51560850	51561299	51561217	49586
chr1	51561500	51562949	51562362	11577
chr1	51564300	51565399	51564772	7527
chr1	51566400	51567199	51566702	5208
chr1	51570050	51570199	51570112	47282
chr1	51576400	51578499	51578137	19972
chr1	51578850	51579599	51579147	2915
chr1	51582600	51583399	51582902	18513
chr1	51586550	51586849	51586807	48209
chr1	51586900	51588249	51588057	11558
chr1	51588900	51589749	51589092	6828
chr1	51592850	51593299	51593242	35422
chr1	51641600	51642249	51642247	21098
chr1	51674950	51675399	51674952	43042
chr1	51805150	51805599	51805282	10158
chr1	51843250	51845299	51844532	7171
chr1	51845450	51846149	51845667	24867
chr1	51846750	51847349	51847022	8150
chr1	51862900	51863399	51863112	17688
chr1	51873000	51873149	51873022	58463
chr1	51876250	51876649	51876432	35890
chr1	51877100	51878349	51877677	23375
chr1	51879400	51879849	51879502	13795
chr1	51929350	51929849	51929482	36699
chr1	51929950	51930049	51930017	58002
chr1	51930800	51931549	51931082	28683
chr1	51932050	51932699	51932302	10932
chr1	51936650	51937049	51936667	54566
chr1	51963000	51963899	51963517	36939
chr1	51964000	51965049	51964307	4958
chr1	51966300	51966799	51966362	17652
chr1	51968600	51968849	51968757	48199
chr1	51970450	51970649	51970587	46228
chr1	51993200	51993599	51993502	34050
chr1	51993950	51994299	51994217	43828
chr1	52053000	52053899	52053562	20769
chr1	52168150	52168349	52168237	45448
chr1	52168400	52170349	52168747	7109
chr1	52177550	52177849	52177592	39799
chr1	52287200	52287449	52287387	48281
chr1	52287750	52288199	52287832	9063
chr1	52310650	52311249	52311087	16204
chr1	52311700	52311849	52311772	45385
chr1	52316300	52316399	52316382	38100
chr1	52336100	52336449	52336372	23277
chr1	52336800	52337449	52336892	22440
chr1	52337500	52337699	52337602	56564
chr1	52536450	52536599	52536552	51538
chr1	52546600	52546999	52546602	42371
chr1	52551900	52552349	52552202	35012
chr1	52558300	52558799	52558517	18581
chr1	52612400	52612849	52612722	44355
chr1	52634800	52635949	52635837	23897
chr1	52651650	52652299	52652117	24310
chr1	52652900	52654399	52653267	11783
chr1	52688150	52688599	52688377	24910
chr1	52809600	52809799	52809647	49834
chr1	52821500	52822299	52822287	16499
chr1	52822350	52823099	52822717	15213
chr1	52875000	52875449	52875097	10479
chr1	52902550	52902749	52902562	55319
chr1	52936550	52936749	52936607	50102
chr1	53008800	53008949	53008867	58860
chr1	53251350	53251699	53251567	38381
chr1	53353000	53353199	53353002	42516
chr1	53369000	53369399	53369242	36391
chr1	53408550	53408749	53408622	50254
chr1	53796800	53797599	53797577	6859
chr1	53798350	53798749	53798477	47273
chr1	53903100	53903599	53903452	35337
chr1	53996250	53996599	53996522	34199
chr1	54041550	54041899	54041872	43634
chr1	54042650	54043249	54042722	23991
chr1	54767500	54767999	54767612	16515
chr1	54769500	54769649	54769642	48764
chr1	54770800	54771249	54770972	44814
chr1	54869950	54870099	54870057	54381
chr1	54870900	54871099	54870972	54302
chr1	54882650	54883449	54883122	17972
chr1	54883800	54884749	54884122	907
chr1	54920950	54921349	54921117	45424
chr1	54921950	54922449	54922172	25154
chr1	54923300	54923899	54923772	7650
chr1	54924950	54925649	54925327	17707
chr1	54928900	54929749	54929407	7325
chr1	54945250	54945849	54945752	20205
chr1	55021800	55022499	55022452	4709
chr1	55110900	55111249	55111222	44837
chr1	55141800	55142899	55142762	19330
chr1	55146250	55146599	55146517	45926
chr1	55146900	55147299	55147137	47173
chr1	55189250	55189599	55189532	35960
chr1	55218450	55218899	55218697	23686
chr1	55249450	55249749	55249452	50438
chr1	55296950	55297049	55296952	53020
chr1	55297600	55297799	55297602	36479
chr1	55922700	55922949	55922822	29079
chr1	56572600	56573149	56573112	28678
chr1	56975100	56975449	56975252	57644
chr1	56976200	56976799	56976347	8480
chr1	56978600	56979149	56978987	11260
chr1	56981350	56983049	56981697	22357
chr1	57110850	57111249	57111102	43184
chr1	57115400	57116049	57115767	4850
chr1	57116550	57117149	57116802	11821
chr1	57136750	57137049	57136812	25161
chr1	57152300	57152949	57152777	18324
chr1	57153200	57154199	57153462	5835
chr1	57300050	57300699	57300122	34841
chr1	57300800	57300999	57300812	55071
chr1	57324050	57324449	57324087	27579
chr1	57433600	57434049	57433867	18111
chr1	57435400	57435749	57435542	43811
chr1	57464300	57465549	57464637	10096
chr1	57486300	57486449	57486302	59392
chr1	57486500	57486949	57486517	37270
chr1	57962150	57962549	57962392	35078
chr1	58046350	58046449	58046392	53025
chr1	58054200	58054399	58054397	49576
chr1	58054650	58055799	58055277	34979
chr1	58063900	58064349	58064227	22685
chr1	58064850	58065149	58064952	20003
chr1	58067800	58068199	58068142	15233
chr1	58090350	58090599	58090597	39943
chr1	58130150	58130449	58130282	31709
chr1	58133700	58133949	58133842	49986
chr1	58342250	58342399	58342397	54299
chr1	58342850	58343349	58343027	19838
chr1	58347300	58347549	58347532	33666
chr1	58448350	58448649	58448577	54842
chr1	58451500	58451849	58451637	51496
chr1	58478700	58479399	58478882	23638
chr1	58483300	58483599	58483502	39338
chr1	58483750	58484599	58484062	3305
chr1	58485050	58486699	58485507	3471
chr1	58486850	58486949	58486947	56910
chr1	58503150	58503699	58503547	21566
chr1	58539950	58540649	58540252	5624
chr1	58540800	58541249	58541047	43548
chr1	58644150	58644449	58644232	48097
chr1	58673550	58673749	58673632	40955
chr1	58674150	58674299	58674197	58640
chr1	58772400	58772799	58772717	33337
chr1	58773750	58774249	58773947	5943
chr1	58774500	58774599	58774567	57550
chr1	58778350	58780449	58779577	8867
chr1	58781500	58782549	58782207	21551
chr1	58785800	58786549	58786137	22564
chr1	58798750	58799299	58799042	11786
chr1	58799600	58800349	58799852	5915
chr1	58818200	58818799	58818227	44815
chr1	58853950	58854299	58854207	47186
chr1	58917150	58917399	58917152	32767
chr1	59003300	59003449	59003397	58039
chr1	59007350	59009249	59007912	11286
chr1	59014700	59015249	59014917	27930
chr1	59016800	59017449	59017072	27624
chr1	59017500	59017999	59017927	38627
chr1	59018800	59020599	59019947	9493
chr1	59021050	59021549	59021172	5602
chr1	59024150	59024899	59024667	25760
chr1	59024950	59025599	59025397	18845
chr1	59025950	59026249	59026192	51193
chr1	59028300	59029299	59028867	30075
chr1	59094150	59094499	59094322	47358
chr1	59094750	59095199	59095182	41817
chr1	59177700	59178149	59177712	32152
chr1	59223950	59224549	59224197	17009
chr1	59224750	59225149	59225067	42327
chr1	59292800	59293149	59293092	32690
chr1	59312800	59313249	59312992	21749
chr1	59314850	59315549	59315232	17217
chr1	59340400	59341099	59340807	18948
chr1	59341500	59342499	59341647	23709
chr1	59344100	59344599	59344372	36636
chr1	59344800	59345999	59345422	10167
chr1	59353950	59355099	59354752	847
chr1	59356050	59356499	59356342	14244
chr1	59371600	59372699	59372167	28306
chr1	59441550	59441999	59441962	40615
chr1	59501350	59501999	59501727	15641
chr1	59505050	59505349	59505347	34975
chr1	59506800	59508649	59507127	4561
chr1	59514200	59514499	59514477	34006
chr1	59514900	59515099	59514902	51480
chr1	59516050	59516149	59516052	58543
chr1	59520950	59521999	59521687	21118
chr1	59522700	59523249	59522882	2577
chr1	59530050	59530449	59530312	40953
chr1	59532400	59533049	59532577	9515
chr1	59537100	59537499	59537347	27896
chr1	59543900	59544349	59544032	30234
chr1	59544750	59545399	59544952	12253
chr1	59554400	59554749	59554432	51486
chr1	59614050	59614449	59614257	34338
chr1	59623850	59624049	59623892	40394
chr1	59626100	59627699	59626407	12631
chr1	59628450	59628749	59628467	50596
chr1	59635700	59635849	59635702	54120
chr1	59637150	59637599	59637432	26186
chr1	59725950	59726299	59726177	43144
chr1	59743550	59743799	59743792	57541
chr1	59744700	59745099	59745092	43567
chr1	59782000	59782549	59782372	7065
chr1	59783100	59783199	59783172	57246
chr1	59786950	59787499	59787292	11389
chr1	59789200	59790999	59790512	38967
chr1	59806150	59806849	59806442	17417
chr1	59808550	59809099	59808732	36968
chr1	59810050	59810699	59810387	5911
chr1	59823900	59824299	59824082	33647
chr1	59824800	59824949	59824872	50995
chr1	59851650	59852099	59851827	28093
chr1	59889800	59890299	59890122	19032
chr1	59890800	59891249	59891072	37780
chr1	59904650	59904849	59904662	49729
chr1	59905200	59906099	59905692	31825
chr1	59951550	59953249	59953067	16485
chr1	59956000	59956849	59956092	29939
chr1	59957300	59957449	59957447	49440
chr1	59957650	59958099	59957927	39562
chr1	59971300	59972849	59971687	3795
chr1	60023250	60023499	60023482	47000
chr1	60055750	60057249	60057022	20180
chr1	60057500	60058299	60057897	27423
chr1	60099450	60099699	60099457	51293
chr1	60153400	60153599	60153537	49600
chr1	60155950	60156249	60156152	33553
chr1	60236150	60236499	60236402	36301
chr1	60334700	60334949	60334882	43118
chr1	60410200	60410349	60410202	49319
chr1	60417250	60417599	60417447	42030
chr1	60418900	60419249	60419127	20169
chr1	60458150	60458649	60458387	33094
chr1	60459000	60459249	60459182	45973
chr1	60467350	60467649	60467542	37077
chr1	60473500	60474299	60474192	52330
chr1	60636850	60637049	60636957	43600
chr1	60719200	60719499	60719482	32756
chr1	60724250	60724549	60724407	40847
chr1	60759200	60759399	60759212	50945
chr1	60775900	60776199	60775947	45774
chr1	60801450	60801899	60801607	28567
chr1	60802500	60802649	60802527	48675
chr1	60803000	60803299	60803297	47469
chr1	60815850	60817249	60816107	21436
chr1	60819250	60819799	60819562	30046
chr1	60819950	60820249	60820107	52407
chr1	60821900	60822099	60821967	49362
chr1	60822750	60822999	60822752	44961
chr1	60824500	60824949	60824637	32920
chr1	60826150	60827249	60826627	7538
chr1	60836200	60836749	60836542	39632
chr1	60850700	60851149	60850937	45273
chr1	60857000	60857349	60857337	41198
chr1	60860450	60861099	60860767	12388
chr1	60861550	60862049	60861572	22551
chr1	60868750	60869399	60869397	26052
chr1	60873500	60873699	60873562	45522
chr1	60873900	60874449	60874262	33484
chr1	60875400	60876099	60875872	24063
chr1	60880900	60881449	60881127	15681
chr1	60881700	60882149	60881977	36016
chr1	60883250	60884049	60883372	22484
chr1	60886400	60886799	60886602	32172
chr1	60889600	60890049	60889992	33534
chr1	60890950	60891149	60891032	52693
chr1	60904000	60904249	60904002	53291
chr1	60906750	60907999	60907687	10160
chr1	60908750	60909849	60909067	6609
chr1	60910050	60910199	60910052	58563
chr1	60914750	60914949	60914917	50101
chr1	60916900	60917349	60917332	48262
chr1	60930150	60930349	60930252	46874
chr1	61130850	61131049	61130892	57109
chr1	62596600	62598399	62597927	8683
chr1	62598450	62599049	62598867	28340
chr1	62638150	62638349	62638292	56027
chr1	62744600	62745049	62744892	23642
chr1	62745400	62745749	62745542	27755
chr1	62748100	62748249	62748177	51194
chr1	62749000	62749449	62749182	21715
chr1	62754500	62759199	62757202	2504
chr1	62760100	62763149	62760737	5794
chr1	62765100	62765299	62765297	47616
chr1	62765450	62769449	62768002	323
chr1	62770800	62771299	62771052	29502
chr1	62771850	62771999	62771932	50500
chr1	62774700	62777099	62776862	8559
chr1	62782350	62782599	62782452	50359
chr1	62783200	62785249	62784712	502
chr1	62785650	62789799	62785937	1618
chr1	62790450	62791299	62790972	2442
chr1	62793850	62794099	62793917	47365
chr1	62796600	62796699	62796697	57392
chr1	62796850	62797849	62797407	1888
chr1	62798100	62799949	62798487	259
chr1	62803200	62803299	62803287	58631
chr1	62803750	62804899	62804267	10850
chr1	62837800	62838749	62838287	13852
chr1	62838950	62839749	62839132	24891
chr1	62931650	62932149	62931992	42886
chr1	62934600	62934899	62934632	39478
chr1	62947250	62948549	62947852	6490
chr1	62979700	62980099	62979837	43166
chr1	62980250	62980349	62980342	58097
chr1	62980600	62981149	62980737	20322
chr1	63022550	63022949	63022877	32683
chr1	63023500	63024199	63023912	9935
chr1	63033400	63033849	63033412	28866
chr1	63034550	63034649	63034552	59832
chr1	63140300	63140649	63140472	34440
chr1	63154300	63154599	63154482	41319
chr1	63221700	63222099	63222097	47459
chr1	63224450	63224849	63224622	38824
chr1	63236950	63237549	63237192	6626
chr1	63237750	63238399	63237967	4912
chr1	63238700	63239349	63239092	7321
chr1	63239550	63240149	63240022	21289
chr1	63248750	63248899	63248897	51587
chr1	63469300	63469499	63469362	50781
chr1	63613600	63613799	63613787	47483
chr1	63754800	63755349	63755132	28241
chr1	63755800	63756449	63756157	7773
chr1	63810350	63810549	63810412	42919
chr1	63812400	63813649	63812742	8758
chr1	63822500	63822999	63822677	12740
chr1	63823800	63824399	63824162	21621
chr1	63866300	63866499	63866302	53486
chr1	63866700	63867249	63866922	17782
chr1	63984350	63984649	63984462	40606
chr1	63985250	63985349	63985257	59431
chr1	63985450	63985649	63985467	48642
chr1	64066050	64067049	64066632	16094
chr1	64068300	64069899	64068617	19557
chr1	64078050	64078349	64078137	44167
chr1	64078600	64079099	64078902	34805
chr1	64091250	64092099	64091807	16075
chr1	64098600	64099099	64098817	24120
chr1	64107750	64107849	64107847	57833
chr1	64125600	64127249	64126912	3145
chr1	64142900	64143749	64143277	14965
chr1	64143800	64145549	64144817	13593
chr1	64147250	64147999	64147542	17176
chr1	64148200	64149099	64148397	1953
chr1	64154100	64154549	64154267	51690
chr1	64157950	64158049	64158022	59354
chr1	64158350	64158699	64158697	45113
chr1	64164500	64165299	64165047	38367
chr1	64184150	64184299	64184292	53664
chr1	64184550	64184899	64184792	54388
chr1	64351050	64351249	64351242	52408
chr1	64386150	64386299	64386152	56295
chr1	64581500	64582099	64581757	31778
chr1	64582400	64582699	64582507	45463
chr1	64583050	64583449	64583202	43104
chr1	64583550	64584199	64583812	26822
chr1	64584750	64585399	64584957	24746
chr1	64585950	64586099	64586062	56186
chr1	64592600	64592699	64592652	56161
chr1	64593300	64593399	64593347	55944
chr1	64646850	64648749	64648582	9669
chr1	64649850	64650149	64649902	16096
chr1	64651150	64651449	64651327	35351
chr1	64661500	64661649	64661647	51890
chr1	64664850	64665049	64665037	57045
chr1	64738650	64739999	64739747	10446
chr1	64757750	64757999	64757997	47073
chr1	64758550	64758649	64758637	59826
chr1	64758850	64759049	64758907	42425
chr1	64761800	64762849	64761887	30220
chr1	64802650	64803249	64802997	22379
chr1	64803950	64804049	64804047	53058
chr1	64864100	64864249	64864107	44886
chr1	64864500	64865049	64864877	26676
chr1	64872200	64872899	64872582	4478
chr1	64873400	64873999	64873782	38654
chr1	64893650	64893949	64893947	37435
chr1	64894400	64897249	64896242	5260
chr1	64897400	64898249	64897722	32497
chr1	64898450	64899449	64898797	22785
chr1	64899850	64900649	64900417	11131
chr1	64921350	64921849	64921632	39496
chr1	64922100	64923199	64922567	7547
chr1	64961100	64961349	64961242	46637
chr1	64963350	64963999	64963987	17186
chr1	64965150	64965549	64965207	43929
chr1	65222800	65223199	65223037	39438
chr1	65229550	65229649	65229587	58779
chr1	66635450	66635699	66635462	50457
chr1	66662300	66663549	66663037	18149
chr1	66664100	66664399	66664257	38790
chr1	66684000	66684649	66684237	23811
chr1	66690100	66690349	66690297	41586
chr1	66695250	66695399	66695262	59049
chr1	66748600	66748999	66748862	36110
chr1	66880750	66880999	66880772	41987
chr1	66942150	66942299	66942187	52430
chr1	67050150	67050499	67050152	17892
chr1	67084400	67084799	67084607	36101
chr1	67095900	67096099	67096092	44848
chr1	67443900	67444249	67444097	30184
chr1	67919200	67919499	67919382	26858
chr1	68103450	68103899	68103572	28939
chr1	68826500	68826849	68826847	29099
chr1	69731350	69731649	69731487	32846
chr1	70112750	70114049	70113782	8118
chr1	70119250	70119699	70119352	52628
chr1	70120600	70121099	70120767	47327
chr1	70124350	70124749	70124742	39918
chr1	70126600	70126899	70126732	25868
chr1	70128650	70128749	70128652	58165
chr1	70129650	70129899	70129727	54836
chr1	70180100	70180299	70180297	41849
chr1	70181600	70181799	70181762	55755
chr1	70182400	70182899	70182687	32400
chr1	70211450	70212199	70211737	17123
chr1	71143800	71144899	71144047	34851
chr1	71146500	71146799	71146692	41512
chr1	71147950	71148199	71148047	52171
chr1	71354300	71354849	71354512	30315
chr1	71374150	71374649	71374387	35557
chr1	71382300	71382799	71382797	27503
chr1	71383200	71383449	71383437	47309
chr1	71384000	71384099	71384047	58190
chr1	71385050	71385949	71385332	10510
chr1	71386100	71386249	71386232	57693
chr1	71387900	71388449	71388347	16690
chr1	71479400	71479549	71479422	55651
chr1	71594350	71594499	71594402	45776
chr1	71604750	71604849	71604752	57367
chr1	71697300	71698499	71698207	29037
chr1	71701000	71701349	71701187	45255
chr1	71736000	71736499	71736467	11170
chr1	71736750	71738099	71736967	13643
chr1	71738450	71738749	71738602	56112
chr1	71757150	71757349	71757157	51787
chr1	71769650	71770099	71769862	37408
chr1	71791450	71791699	71791562	35675
chr1	71809650	71810149	71810032	14242
chr1	71810500	71811049	71810757	4490
chr1	71846700	71847549	71847372	3142
chr1	71854500	71855049	71854807	7723
chr1	71859500	71859799	71859797	44744
chr1	71862950	71863049	71863022	47517
chr1	71880350	71880699	71880362	53889
chr1	71911900	71912999	71912142	12500
chr1	71923300	71923949	71923507	11275
chr1	71926300	71927049	71926657	31822
chr1	71927900	71928299	71928212	36489
chr1	71932050	71933449	71933147	4592
chr1	71940850	71941099	71941092	37508
chr1	71950700	71951199	71950977	33529
chr1	71955750	71956149	71955867	43046
chr1	71956750	71957599	71957307	19657
chr1	71958000	71958249	71958157	55361
chr1	71959200	71960299	71959502	15506
chr1	71962050	71963549	71963062	11300
chr1	71964100	71964799	71964322	19040
chr1	71968150	71968399	71968252	39930
chr1	71982800	71983899	71983357	1173
chr1	71984950	71985199	71985057	46728
chr1	72003800	72004299	72004287	27044
chr1	72048350	72048949	72048902	20031
chr1	72052800	72053299	72053067	8350
chr1	72053950	72054349	72054047	17201
chr1	72064150	72065049	72064872	10788
chr1	72065500	72065899	72065802	38548
chr1	72106750	72107299	72106947	38646
chr1	72115450	72116149	72115877	6458
chr1	72117100	72117299	72117112	54901
chr1	72125800	72126349	72125852	43775
chr1	72152200	72152749	72152417	39211
chr1	72261700	72261899	72261722	43978
chr1	72331200	72331349	72331307	53124
chr1	72355700	72356149	72355772	43210
chr1	72357200	72357749	72357287	23269
chr1	72357950	72358299	72358197	48644
chr1	72404750	72404949	72404782	53615
chr1	72411000	72411349	72411312	32236
chr1	72418350	72418949	72418747	12501
chr1	72419350	72420499	72419612	10125
chr1	72429050	72429599	72429342	12119
chr1	72430150	72430849	72430437	23931
chr1	72431350	72431699	72431542	38434
chr1	72460100	72460949	72460647	16788
chr1	72461700	72462549	72462077	7387
chr1	72466300	72467549	72466652	11513
chr1	72474350	72475149	72474632	10326
chr1	72476200	72476699	72476317	18051
chr1	72494600	72498399	72496192	2346
chr1	72508550	72508899	72508647	30963
chr1	72509300	72509499	72509492	50990
chr1	72511600	72512099	72511777	22028
chr1	72512450	72513349	72512677	1147
chr1	72536900	72537349	72536947	38861
chr1	72537500	72537649	72537617	54196
chr1	72548350	72548749	72548622	24511
chr1	72556850	72557299	72557297	26123
chr1	72582700	72582849	72582702	51784
chr1	72584550	72584949	72584642	43545
chr1	72597100	72597649	72597297	33928
chr1	72611350	72611599	72611352	32705
chr1	72625350	72625749	72625472	38093
chr1	72630700	72630899	72630802	53517
chr1	72639600	72639899	72639812	51039
chr1	72681200	72681699	72681562	36146
chr1	72681850	72683199	72682622	5233
chr1	72759150	72760049	72759732	19245
chr1	72800750	72800899	72800767	52607
chr1	72801700	72802249	72802012	9360
chr1	72802750	72803349	72802947	1546
chr1	72825650	72825999	72825697	49928
chr1	72826800	72827549	72827392	44520
chr1	72879750	72879949	72879927	54562
chr1	72880050	72880299	72880052	55830
chr1	72880500	72880649	72880642	58060
chr1	72885700	72886049	72885862	24188
chr1	72924900	72925049	72925007	56602
chr1	72925650	72925999	72925967	33747
chr1	73085250	73085399	73085347	45233
chr1	73085800	73085949	73085802	53548
chr1	73106350	73106999	73106537	9293
chr1	73107400	73108949	73107492	26703
chr1	73288550	73288749	73288552	53314
chr1	73289650	73289749	73289652	54799
chr1	73317200	73317799	73317797	15851
chr1	73319500	73319799	73319737	37863
chr1	73509600	73510249	73509812	33194
chr1	73729850	73729999	73729942	51564
chr1	74002450	74002849	74002622	33838
chr1	74044900	74045099	74044902	58661
chr1	74221750	74222199	74222017	15634
chr1	74222750	74223699	74223127	8809
chr1	74226300	74227399	74227007	21432
chr1	74227900	74228349	74228242	31173
chr1	74285250	74286049	74285692	19609
chr1	74287750	74289499	74287862	6869
chr1	74290250	74290499	74290452	43313
chr1	74294150	74297249	74295127	4915
chr1	74318000	74318249	74318112	51374
chr1	74321950	74322099	74322027	58614
chr1	74330150	74330549	74330387	16382
chr1	74332700	74333399	74332927	29677
chr1	74335200	74335649	74335282	12790
chr1	74340200	74341049	74340807	5495
chr1	74343150	74346449	74344837	1044
chr1	74346950	74347499	74347212	33669
chr1	74348100	74348349	74348282	44030
chr1	74348750	74349599	74349287	29240
chr1	74351750	74352099	74351832	45947
chr1	74379900	74380949	74380467	8115
chr1	74381200	74381949	74381287	35442
chr1	74422800	74423099	74423037	23610
chr1	74434300	74434549	74434317	54115
chr1	74443350	74443549	74443352	32220
chr1	74480650	74481349	74481022	12864
chr1	74531750	74532349	74532002	29834
chr1	74532750	74533449	74533222	22639
chr1	74554550	74555149	74554552	33265
chr1	74560700	74561249	74561052	32949
chr1	74632650	74633599	74633307	9576
chr1	74647050	74647199	74647197	33361
chr1	74790500	74791199	74790697	31554
chr1	74818000	74818199	74818002	52153
chr1	74819100	74819199	74819197	54337
chr1	74847350	74847699	74847592	28762
chr1	74859200	74859649	74859442	34684
chr1	74860950	74861499	74861177	12498
chr1	74861800	74862249	74862237	34431
chr1	74997000	74997099	74997092	57331
chr1	75032600	75032849	75032682	45907
chr1	75120800	75120899	75120877	56561
chr1	75136900	75136999	75136997	53305
chr1	75187700	75187849	75187707	58466
chr1	75189550	75189799	75189797	41544
chr1	75206250	75206899	75206672	27426
chr1	75208050	75208799	75208432	7939
chr1	75236300	75236499	75236307	58575
chr1	75236550	75236749	75236582	52867
chr1	75244350	75246349	75246112	7124
chr1	75377400	75378299	75377662	23689
chr1	75388950	75389499	75389272	21620
chr1	75389900	75390399	75390092	20451
chr1	75394700	75395199	75394942	42318
chr1	75396000	75396349	75396107	51335
chr1	75397700	75398299	75397767	1937
chr1	75474100	75474849	75474482	25582
chr1	75476500	75476649	75476602	57593
chr1	75503300	75503599	75503302	37023
chr1	75519150	75519449	75519287	33501
chr1	75555550	75556099	75555957	14173
chr1	75638650	75638999	75638657	43261
chr1	75690100	75690749	75690412	1826
chr1	75829350	75829799	75829592	28217
chr1	75842200	75842349	75842277	52325
chr1	75913000	75913299	75913062	41211
chr1	76035350	76035749	76035637	26290
chr1	76071450	76072299	76071942	17001
chr1	76072700	76072949	76072842	47426
chr1	76108050	76108249	76108062	53126
chr1	76241550	76241899	76241702	39134
chr1	77347150	77347499	77347197	51454
chr1	77940950	77942049	77941727	21030
chr1	77942100	77943849	77943107	21078
chr1	77974950	77975199	77975092	45761
chr1	77975800	77975999	77975987	53227
chr1	77996250	77996899	77996522	15519
chr1	78005600	78006399	78006087	20313
chr1	78007650	78007999	78007792	40304
chr1	78009350	78010999	78009827	5937
chr1	78012100	78012999	78012667	1297
chr1	78013350	78013799	78013427	35042
chr1	78028650	78030149	78029167	18330
chr1	78034550	78035899	78035157	30356
chr1	78042050	78042249	78042177	54889
chr1	78047650	78048049	78047682	13228
chr1	78053450	78054449	78054372	30709
chr1	78055000	78056899	78055282	3420
chr1	78057350	78057649	78057462	47904
chr1	78057750	78059049	78058277	9828
chr1	78060900	78061299	78061292	30923
chr1	78061750	78063499	78062102	7567
chr1	78064050	78065549	78064947	6796
chr1	78066300	78068349	78067297	672
chr1	78074550	78075199	78074612	36268
chr1	78084800	78086299	78085377	19843
chr1	78086450	78086649	78086582	55496
chr1	78086800	78087149	78087067	51089
chr1	78089700	78090299	78089942	20304
chr1	78092400	78092849	78092507	29936
chr1	78113150	78114399	78113547	7186
chr1	78115200	78115599	78115382	31546
chr1	78116150	78116349	78116222	41243
chr1	78120800	78121299	78121062	26054
chr1	78121550	78122049	78121637	37417
chr1	78125750	78126849	78125997	13591
chr1	78134200	78134549	78134212	37632
chr1	78135250	78136449	78135867	8847
chr1	78136750	78137049	78136762	45743
chr1	78137250	78137599	78137597	41442
chr1	78138650	78139199	78138827	29199
chr1	78139300	78139949	78139552	20564
chr1	78140150	78142849	78140942	12440
chr1	78143000	78151099	78149372	1022
chr1	78151500	78153749	78152717	2708
chr1	78154200	78156149	78154632	5461
chr1	78156650	78164549	78159997	85
chr1	78164750	78164999	78164977	50140
chr1	78165300	78169849	78166737	2396
chr1	78170200	78170749	78170732	31439
chr1	78171250	78171499	78171252	46442
chr1	78171650	78174399	78172002	12556
chr1	78174800	78177349	78174967	4493
chr1	78177650	78182749	78181362	7164
chr1	78182850	78182999	78182992	58032
chr1	78184050	78184299	78184257	46043
chr1	78194500	78194799	78194722	47334
chr1	78211800	78212149	78212032	39666
chr1	78322500	78322999	78322917	38441
chr1	78327450	78327999	78327782	22605
chr1	78343850	78344099	78343872	33827
chr1	78344500	78344949	78344772	42595
chr1	78345150	78345599	78345152	47794
chr1	78384300	78384599	78384477	55899
chr1	78384650	78384949	78384897	40997
chr1	78391200	78392299	78391407	25488
chr1	78393150	78393649	78393347	32098
chr1	78418500	78420199	78419902	16435
chr1	78420450	78420649	78420477	49621
chr1	78423450	78423699	78423612	42534
chr1	78436150	78436749	78436537	11884
chr1	78437150	78437399	78437232	44927
chr1	78443900	78444699	78444252	6791
chr1	78444950	78445799	78445522	3805
chr1	78447450	78447899	78447662	30052
chr1	78448400	78449499	78448682	12316
chr1	78458100	78459349	78458927	20384
chr1	78459850	78460549	78460172	43869
chr1	78479850	78480949	78480667	9272
chr1	78481500	78481649	78481617	54298
chr1	78482050	78482999	78482522	6274
chr1	78483300	78484549	78483517	17209
chr1	78508950	78509499	78509227	17817
chr1	78529450	78529749	78529567	40140
chr1	78534850	78535999	78535172	20632
chr1	78545400	78545799	78545417	46227
chr1	78546300	78546599	78546317	45060
chr1	78581600	78581699	78581652	57712
chr1	78583300	78583499	78583487	38895
chr1	78583900	78584199	78584057	42561
chr1	78584550	78585349	78584602	11898
chr1	78638300	78639249	78638592	19671
chr1	78643700	78645799	78645512	17478
chr1	78646350	78646599	78646522	45690
chr1	78650850	78651449	78651237	18447
chr1	78652050	78653649	78652667	15491
chr1	78657700	78658099	78657922	30938
chr1	78698700	78698799	78698772	56050
chr1	78700000	78701399	78701002	7550
chr1	78702050	78703199	78702417	7322
chr1	78712100	78712349	78712257	51456
chr1	78712650	78713099	78712707	28019
chr1	78721600	78721799	78721637	48103
chr1	78903900	78904349	78904047	13720
chr1	78904900	78905249	78904982	43650
chr1	79436450	79436649	79436467	52557
chr1	79557850	79558149	79558102	28055
chr1	79578700	79578899	79578837	49650
chr1	79652400	79653199	79652907	18001
chr1	79707600	79708249	79707742	23347
chr1	79726800	79728249	79727177	11502
chr1	79729050	79729649	79729262	48727
chr1	79731200	79732049	79731917	18832
chr1	79732200	79734949	79733907	2607
chr1	79735650	79738649	79736257	275
chr1	79745800	79746049	79746017	53421
chr1	79747000	79747749	79747412	17954
chr1	79748250	79753199	79748802	1872
chr1	79753500	79755599	79755157	14237
chr1	79758850	79759399	79759072	43827
chr1	79760250	79761149	79760502	14778
chr1	79775050	79775949	79775522	9025
chr1	79784550	79785149	79784942	5176
chr1	79799200	79799499	79799462	38705
chr1	79814300	79814599	79814477	47285
chr1	79819150	79819549	79819347	20034
chr1	79855950	79857949	79857677	17287
chr1	79858250	79858549	79858497	40985
chr1	79871250	79871799	79871517	37143
chr1	79871850	79871999	79871862	50938
chr1	79881350	79881849	79881592	43886
chr1	79882300	79882499	79882397	51322
chr1	79974500	79974799	79974687	27969
chr1	79975300	79975899	79975527	17529
chr1	80015050	80015199	80015077	58850
chr1	80015550	80015999	80015727	25099
chr1	80019900	80020299	80019947	48738
chr1	80020400	80020599	80020597	57871
chr1	80020650	80020849	80020657	58868
chr1	80021300	80021949	80021882	12784
chr1	80029550	80030049	80029832	19071
chr1	80035850	80036049	80035852	38796
chr1	80036200	80036649	80036457	47174
chr1	80233650	80234199	80233952	7569
chr1	80235450	80235799	80235602	17271
chr1	80245800	80245999	80245872	44528
chr1	80321150	80321449	80321262	41776
chr1	80323300	80323649	80323447	36705
chr1	80324000	80324149	80324132	57908
chr1	80326650	80327349	80326902	15278
chr1	80327400	80328349	80327717	11432
chr1	80329600	80329949	80329677	38910
chr1	80330300	80330799	80330597	20004
chr1	80333900	80334049	80334027	51808
chr1	80633050	80633649	80633182	18030
chr1	80634200	80634799	80634572	26191
chr1	80851100	80851949	80851337	27667
chr1	81615150	81615599	81615462	44006
chr1	81616000	81616149	81616057	51433
chr1	81657600	81657949	81657797	50221
chr1	81714950	81715399	81715002	26509
chr1	81733800	81734749	81734517	5306
chr1	81735700	81737449	81736932	28154
chr1	81740700	81741999	81741862	3897
chr1	81742900	81743599	81743062	28648
chr1	81752200	81752449	81752447	39052
chr1	81756200	81756799	81756412	24431
chr1	81855200	81855699	81855647	14119
chr1	81856700	81857249	81857002	20673
chr1	81908850	81909899	81909802	17027
chr1	81910550	81911349	81910912	2310
chr1	81947550	81949099	81948622	22354
chr1	81949500	81949949	81949892	43848
chr1	81950900	81951249	81951022	39209
chr1	81957850	81958749	81958537	9206
chr1	81959500	81961099	81960332	713
chr1	81962650	81963349	81962842	34077
chr1	81963950	81964349	81964097	39456
chr1	81965050	81965199	81965052	55431
chr1	81974300	81974699	81974392	50925
chr1	81989600	81990299	81990197	29667
chr1	81990650	81990999	81990992	47711
chr1	82004250	82005049	82004587	16817
chr1	82005650	82006349	82006082	12484
chr1	82011700	82012599	82011902	18886
chr1	82024350	82024749	82024452	13152
chr1	82036600	82036999	82036822	46913
chr1	82037450	82037849	82037657	26978
chr1	82038600	82039049	82038787	31383
chr1	82041700	82042799	82042277	30582
chr1	82065700	82065899	82065702	46452
chr1	82076800	82077749	82077337	6379
chr1	82090000	82090549	82090157	19171
chr1	82106150	82106749	82106397	19603
chr1	82107300	82107999	82107607	11498
chr1	82112700	82113749	82113482	33239
chr1	82147950	82148349	82148327	24132
chr1	82152000	82152449	82152277	40523
chr1	82152950	82153449	82153162	45398
chr1	82181000	82181549	82181352	24382
chr1	82196050	82196749	82196327	17556
chr1	82197250	82197499	82197377	48461
chr1	82248100	82248199	82248122	58735
chr1	82270650	82270849	82270652	54077
chr1	82271000	82271799	82271322	7759
chr1	82278300	82279149	82278932	6082
chr1	82314050	82314149	82314137	57105
chr1	82320800	82321449	82321002	24764
chr1	82342300	82342749	82342707	27966
chr1	82344400	82344749	82344497	27553
chr1	82354850	82355099	82354922	46678
chr1	82356450	82356799	82356697	50900
chr1	82358450	82359499	82358752	13435
chr1	82368050	82369199	82368212	41977
chr1	82371650	82371799	82371677	53724
chr1	82375200	82375749	82375362	8154
chr1	82424850	82425749	82425472	3193
chr1	82426000	82426649	82426157	10199
chr1	82429650	82429949	82429907	28816
chr1	82471050	82472349	82471487	6209
chr1	82473950	82474049	82473952	49489
chr1	82478950	82479249	82479047	31900
chr1	82697700	82697799	82697757	48286
chr1	82698400	82698499	82698402	59247
chr1	82707700	82707849	82707792	55480
chr1	82742950	82743349	82743112	39800
chr1	82804650	82805199	82805032	6774
chr1	82805550	82806249	82805702	16859
chr1	82828900	82830749	82829687	8201
chr1	82831650	82831849	82831732	49698
chr1	82837400	82837599	82837597	43953
chr1	82900900	82901449	82901142	21604
chr1	82901550	82902349	82902182	32565
chr1	82914250	82915899	82915472	7374
chr1	82916500	82917299	82917082	16045
chr1	82957900	82958649	82957947	14083
chr1	82972300	82973049	82972542	19082
chr1	83097700	83098349	83097917	36164
chr1	83268750	83269299	83268972	20900
chr1	83269400	83269799	83269662	34626
chr1	84236800	84237149	84237102	26193
chr1	84585500	84585799	84585792	45074
chr1	84838100	84838299	84838187	38707
chr1	84843350	84844099	84843922	4903
chr1	84847750	84849399	84848322	17002
chr1	84850950	84852399	84851487	8762
chr1	84852600	84854099	84853007	7974
chr1	84854750	84855099	84854792	15113
chr1	84878700	84879299	84878932	10486
chr1	84931200	84931549	84931547	32548
chr1	87629100	87629299	87629117	42716
chr1	87638950	87639449	87639082	28902
chr1	87692050	87692149	87692147	52800
chr1	87694900	87695149	87695117	46316
chr1	87696150	87696699	87696437	23907
chr1	87705650	87707099	87706277	28312
chr1	87866450	87866699	87866537	39111
chr1	87962750	87963299	87962812	35607
chr1	88051750	88052249	88051982	39145
chr1	88063350	88064099	88064042	29758
chr1	88137150	88137699	88137457	9900
chr1	88254200	88254349	88254212	56881
chr1	88254400	88254799	88254752	22770
chr1	88257350	88257699	88257507	34719
chr1	88316000	88316649	88316292	22225
chr1	88329900	88330449	88330172	13085
chr1	88332250	88334649	88333682	3079
chr1	88335400	88337149	88336832	12765
chr1	88344300	88344499	88344472	45421
chr1	88388000	88388149	88388107	54738
chr1	88388200	88389499	88388607	4091
chr1	88397900	88398399	88398132	32364
chr1	88401550	88402449	88402047	7138
chr1	88403150	88403499	88403177	50600
chr1	88406550	88406749	88406552	55127
chr1	88412450	88413099	88412602	36633
chr1	88419200	88419649	88419512	20950
chr1	88421350	88421549	88421352	57602
chr1	88425800	88426499	88426047	12068
chr1	88466300	88466699	88466607	47105
chr1	88477600	88477899	88477767	37718
chr1	88484300	88484999	88484402	4663
chr1	88495550	88497299	88496952	16226
chr1	88503600	88503949	88503877	32876
chr1	88518700	88518999	88518907	46790
chr1	88519200	88519699	88519457	22997
chr1	88539300	88539799	88539612	3444
chr1	88540700	88541099	88540722	33187
chr1	88552350	88552649	88552472	24996
chr1	88566550	88566749	88566702	43366
chr1	88587200	88587399	88587207	43240
chr1	88592500	88592599	88592532	53312
chr1	88599700	88599949	88599912	52283
chr1	88601900	88602399	88602072	23088
chr1	88604150	88604249	88604162	58347
chr1	88727950	88728249	88727977	43238
chr1	88730250	88730799	88730707	39786
chr1	88731000	88731149	88731122	54806
chr1	88731650	88732149	88731687	10693
chr1	88741850	88742699	88741962	8305
chr1	88865750	88865899	88865792	56246
chr1	88872950	88873099	88872952	52571
chr1	88880950	88882199	88881962	26625
chr1	88882400	88882999	88882597	19927
chr1	88893400	88893549	88893537	49553
chr1	88893600	88894549	88894232	8616
chr1	88895100	88895749	88895477	21940
chr1	88897800	88900199	88899027	7837
chr1	88900400	88900999	88900787	28163
chr1	88904200	88904449	88904442	38669
chr1	88904850	88905299	88904982	37072
chr1	88908100	88909049	88908677	30977
chr1	88909100	88910299	88909617	33232
chr1	88915550	88915799	88915717	24406
chr1	88924700	88925449	88924977	30863
chr1	88925600	88930099	88926737	30
chr1	88930950	88932549	88931657	5507
chr1	88932650	88934499	88933397	13300
chr1	88937450	88937649	88937597	48717
chr1	88960050	88961749	88960987	25557
chr1	88964250	88964399	88964297	43706
chr1	88968400	88968849	88968567	11717
chr1	88982350	88983099	88982797	29399
chr1	89072300	89072749	89072302	26347
chr1	89076750	89078299	89077362	6776
chr1	89111950	89112399	89112397	27201
chr1	89114250	89114399	89114262	56794
chr1	89151000	89151299	89151297	28014
chr1	89151350	89151499	89151487	57962
chr1	89151600	89152549	89152457	9822
chr1	89168800	89170199	89169702	7737
chr1	89170650	89171199	89170872	9990
chr1	89173350	89174049	89173797	12889
chr1	89183150	89183849	89183597	25302
chr1	89184000	89184949	89184232	4880
chr1	89291650	89291999	89291857	39805
chr1	89368250	89368799	89368477	15163
chr1	89369000	89369699	89369422	3274
chr1	89447900	89448149	89448067	25903
chr1	89618200	89618749	89618667	23712
chr1	89618900	89619549	89618972	22913
chr1	89653550	89653949	89653932	17311
chr1	89725800	89726249	89725962	36665
chr1	89736700	89736849	89736822	43893
chr1	89737350	89737699	89737542	31497
chr1	89743500	89743649	89743617	57141
chr1	89744000	89744749	89744447	14116
chr1	89744900	89745899	89745722	12243
chr1	89746000	89746549	89746317	24112
chr1	89746950	89747549	89747442	34464
chr1	89750950	89751149	89751112	52138
chr1	89753300	89753649	89753527	39531
chr1	89768200	89768799	89768562	36267
chr1	89770250	89770949	89770787	17367
chr1	89775750	89777199	89776207	2063
chr1	89778350	89778799	89778702	32356
chr1	89787000	89789299	89788532	512
chr1	89789350	89790449	89789782	13822
chr1	89795950	89798049	89796477	7188
chr1	89809800	89810199	89809902	36052
chr1	89810400	89810899	89810597	14688
chr1	89856750	89856899	89856882	53493
chr1	90029750	90030599	90030557	24848
chr1	90031450	90031999	90031997	24819
chr1	90032300	90032599	90032407	53803
chr1	90037000	90037199	90037037	42295
chr1	90370850	90370949	90370852	55826
chr1	90371550	90372149	90371862	38195
chr1	90372600	90372749	90372732	53944
chr1	90422100	90422849	90422277	19939
chr1	90519650	90519999	90519922	23169
chr1	90520550	90520899	90520752	37627
chr1	90536050	90536699	90536492	25266
chr1	90696700	90696949	90696912	38656
chr1	90733100	90733349	90733322	36830
chr1	90734050	90734349	90734097	38234
chr1	90735450	90736599	90736212	1004
chr1	90737150	90737899	90737537	21092
chr1	90765950	90766749	90766117	28769
chr1	90772650	90773399	90772977	4846
chr1	90891200	90891799	90891392	4213
chr1	90892350	90892749	90892402	27851
chr1	90908700	90909099	90909082	28344
chr1	90909550	90910099	90909822	33354
chr1	90965350	90965899	90965602	18996
chr1	90976000	90976449	90976022	30506
chr1	90976650	90978199	90977127	8614
chr1	90988950	90989199	90989057	49352
chr1	91001050	91001299	91001147	43308
chr1	91003850	91006649	91004562	919
chr1	91007400	91007549	91007522	52825
chr1	91008950	91009799	91009107	15009
chr1	91013000	91013299	91013002	46135
chr1	91016250	91021599	91018812	3
chr1	91026600	91026749	91026652	53260
chr1	91027600	91029999	91028112	3964
chr1	91032200	91032549	91032527	37861
chr1	91033000	91033399	91033142	32347
chr1	91034250	91034949	91034587	11137
chr1	91081250	91081399	91081267	49394
chr1	91124750	91125199	91125002	27250
chr1	91141800	91141949	91141802	56605
chr1	91414000	91414399	91414272	24385
chr1	91414750	91415349	91414952	4447
chr1	91415850	91415949	91415872	53429
chr1	91465550	91465749	91465672	44970
chr1	91466450	91467199	91466947	8720
chr1	91467300	91468149	91467587	19161
chr1	91540600	91540699	91540662	55869
chr1	91552850	91553199	91553052	32732
chr1	91586100	91586249	91586102	56697
chr1	91596250	91596699	91596592	39297
chr1	91597200	91597549	91597217	34320
chr1	91606000	91606799	91606217	26151
chr1	91607150	91607599	91607352	30911
chr1	91626650	91627049	91626977	23064
chr1	91681950	91682499	91682262	38417
chr1	91682550	91683149	91682812	43197
chr1	91683350	91683749	91683647	21469
chr1	91764350	91764849	91764767	31358
chr1	91765500	91765899	91765627	29966
chr1	91830650	91831049	91830752	23276
chr1	91831550	91832449	91831662	20947
chr1	92031000	92031999	92031807	32744
chr1	92074950	92075349	92074962	42727
chr1	92102800	92104299	92103242	33993
chr1	92104400	92104949	92104482	22508
chr1	92121950	92122149	92122142	37354
chr1	92124400	92125849	92125397	460
chr1	92126100	92128149	92127687	4267
chr1	92128600	92129349	92128872	5531
chr1	92174300	92174699	92174692	32998
chr1	92174900	92175299	92175032	43244
chr1	92176350	92176999	92176602	4645
chr1	92185200	92186799	92185932	18910
chr1	92500800	92501249	92501012	26281
chr1	92547000	92547999	92547227	37572
chr1	92649450	92649749	92649697	49047
chr1	92650200	92650699	92650467	21874
chr1	92651000	92651549	92651327	24420
chr1	92667450	92667649	92667452	44780
chr1	92667750	92667949	92667777	45903
chr1	92668050	92668699	92668062	30783
chr1	92686550	92687049	92686857	23912
chr1	92687300	92687749	92687542	16369
chr1	92730950	92732999	92731882	13815
chr1	92745150	92746099	92745652	19081
chr1	92797150	92797949	92797542	32138
chr1	92800250	92800849	92800547	23129
chr1	92805200	92806099	92805832	1827
chr1	92806850	92807599	92807002	10658
chr1	92810050	92810999	92810897	27261
chr1	92815350	92816149	92815547	16412
chr1	92817800	92818299	92818032	50091
chr1	92818350	92820449	92819782	17183
chr1	92821800	92823299	92822602	10287
chr1	92849750	92850549	92850137	12769
chr1	92850650	92851349	92851007	11760
chr1	92851750	92852649	92852312	9788
chr1	92859500	92860649	92860367	25567
chr1	92863500	92867849	92867482	2010
chr1	92868200	92869549	92868447	11525
chr1	92870150	92871349	92870627	3620
chr1	92871850	92872699	92872362	4506
chr1	92896950	92897599	92897102	14466
chr1	92913200	92913599	92913457	33933
chr1	92918550	92919749	92919502	5491
chr1	92919950	92920599	92920222	11460
chr1	92921300	92922149	92921617	31490
chr1	92936150	92936999	92936612	13011
chr1	92939500	92939949	92939562	49612
chr1	92945450	92946449	92946342	26722
chr1	92947550	92947999	92947887	21327
chr1	92948700	92948949	92948802	51424
chr1	92953150	92956599	92954332	2439
chr1	92956700	92957699	92957557	24621
chr1	92958050	92959799	92958682	2132
chr1	92960200	92961749	92961527	13790
chr1	92962050	92963549	92962542	6043
chr1	92976150	92976449	92976157	33633
chr1	92976950	92977199	92977022	42578
chr1	92983050	92983349	92983052	29933
chr1	92987050	92987549	92987542	24151
chr1	92990800	92993649	92992912	1441
chr1	93089500	93090399	93090172	16153
chr1	93134800	93135299	93134917	38180
chr1	93135350	93136199	93136102	22627
chr1	93136700	93138199	93137157	4604
chr1	93141900	93142249	93142077	41130
chr1	93144300	93145799	93145107	2758
chr1	93148300	93149799	93148507	12030
chr1	93151050	93151399	93151372	52862
chr1	93153850	93155499	93155037	18033
chr1	93156200	93156499	93156492	27120
chr1	93164300	93165249	93164887	15746
chr1	93167950	93168799	93168272	11251
chr1	93169050	93169699	93169432	278
chr1	93175950	93176099	93175952	51368
chr1	93194100	93194249	93194232	47888
chr1	93196750	93200449	93197192	11488
chr1	93208750	93209849	93209427	3283
chr1	93210250	93211149	93210482	8913
chr1	93247200	93248549	93248387	8334
chr1	93249150	93249749	93249287	47150
chr1	93263150	93263249	93263247	40875
chr1	93276700	93277049	93276942	32043
chr1	93293750	93294249	93293867	35120
chr1	93295900	93296049	93295942	54333
chr1	93298150	93298249	93298152	57946
chr1	93301800	93302299	93302232	14735
chr1	93332800	93333149	93332892	29024
chr1	93354700	93355599	93355162	8838
chr1	93356800	93357349	93357082	19675
chr1	93386250	93388399	93387622	4281
chr1	93389550	93389849	93389752	46994
chr1	93390450	93390999	93390817	12441
chr1	93391950	93392199	93391992	46876
chr1	93437900	93438399	93438262	19290
chr1	93459750	93459849	93459822	59267
chr1	93481950	93482949	93482727	1801
chr1	93483000	93483549	93483402	13316
chr1	93589600	93589699	93589647	57945
chr1	93619200	93619749	93619522	22283
chr1	93619850	93620199	93619912	52296
chr1	93629150	93629399	93629187	38185
chr1	93712500	93713299	93712832	19061
chr1	93721400	93721849	93721842	28388
chr1	93722300	93722549	93722337	33016
chr1	93747100	93747749	93747707	6013
chr1	93757250	93757699	93757472	32245
chr1	93818000	93818599	93818202	19737
chr1	93841200	93841299	93841272	54087
chr1	93841700	93842549	93842012	4803
chr1	93851800	93852949	93852297	140
chr1	93853250	93854899	93854042	3961
chr1	93859200	93859649	93859302	33750
chr1	93860500	93862649	93862242	2996
chr1	93865150	93865849	93865447	5977
chr1	93869400	93870599	93870212	28
chr1	93870900	93871799	93871167	8164
chr1	93901050	93902449	93901752	7638
chr1	93903150	93903349	93903157	41788
chr1	93910900	93913549	93911602	1484
chr1	93917250	93917399	93917397	53253
chr1	93918050	93918549	93918107	41564
chr1	93919050	93919349	93919137	41051
chr1	93919550	93919649	93919557	59534
chr1	93930350	93932249	93931587	2260
chr1	93933100	93934899	93933697	177
chr1	93935200	93936599	93935612	5357
chr1	93937050	93938399	93937657	6693
chr1	93939600	93940299	93939707	16241
chr1	93940350	93943049	93942037	3320
chr1	93945650	93946099	93945847	42405
chr1	93947250	93948849	93947552	20272
chr1	93949700	93950999	93950672	5601
chr1	93951300	93951549	93951352	45243
chr1	93951950	93953449	93952542	6899
chr1	93953800	93953949	93953837	46705
chr1	93955100	93955299	93955177	54587
chr1	93955650	93955899	93955652	48949
chr1	93955950	93957999	93957687	887
chr1	93958650	93959649	93958687	6680
chr1	93960700	93961499	93961297	23863
chr1	93968600	93968949	93968747	44696
chr1	93969600	93969799	93969602	44682
chr1	93970700	93971949	93971602	5984
chr1	93972350	93973949	93972907	5130
chr1	93974450	93974649	93974577	52047
chr1	93975050	93975349	93975057	31388
chr1	93975750	93976849	93976462	5158
chr1	93977100	93983449	93977462	1123
chr1	93983750	93986549	93984022	408
chr1	93993450	93994249	93993962	16762
chr1	93995100	93995199	93995192	59033
chr1	93995750	94001749	94000942	520
chr1	94002800	94003199	94003032	41951
chr1	94003400	94004249	94003612	7260
chr1	94004700	94006449	94006022	17970
chr1	94010150	94011399	94010762	19874
chr1	94011600	94012449	94012282	24095
chr1	94019350	94022149	94020342	22693
chr1	94024000	94027049	94026237	956
chr1	94027400	94029349	94027862	3862
chr1	94031750	94033199	94031857	13773
chr1	94033850	94034499	94034362	20949
chr1	94037200	94037999	94037367	24348
chr1	94038750	94042849	94040482	4362
chr1	94049350	94049599	94049572	19316
chr1	94051400	94051749	94051622	33515
chr1	94058800	94058999	94058957	46424
chr1	94061050	94061699	94061632	31981
chr1	94068450	94069649	94069137	26195
chr1	94070100	94072649	94071342	5082
chr1	94073150	94074299	94073492	7347
chr1	94092050	94092599	94092082	35014
chr1	94113300	94113599	94113322	23014
chr1	94124000	94126099	94125317	9180
chr1	94147650	94148599	94148342	9597
chr1	94149150	94149599	94149352	44119
chr1	94152950	94153649	94153322	30073
chr1	94161200	94161449	94161212	32499
chr1	94166850	94167299	94167102	37853
chr1	94191150	94191449	94191427	42632
chr1	94220600	94221049	94220752	36308
chr1	94268800	94269849	94269122	30129
chr1	94272800	94272999	94272982	53553
chr1	94275450	94275749	94275477	41621
chr1	94276400	94276699	94276417	36316
chr1	94281100	94281199	94281102	55608
chr1	94285200	94285699	94285292	16743
chr1	94333200	94334399	94333777	1845
chr1	94335000	94335949	94335557	6871
chr1	94344750	94345799	94344842	28006
chr1	94369000	94369599	94369527	30779
chr1	94371000	94371149	94371147	47887
chr1	94440350	94440499	94440447	53940
chr1	94512850	94512949	94512852	52678
chr1	94523900	94523999	94523987	56207
chr1	94524450	94525049	94524677	26260
chr1	94530300	94531749	94531442	4210
chr1	94532200	94532949	94532457	3700
chr1	94536750	94537599	94537287	20978
chr1	94541100	94541549	94541367	44773
chr1	94541700	94541949	94541752	46655
chr1	94544250	94544449	94544262	50473
chr1	94545850	94546899	94546097	6993
chr1	94547300	94549249	94547772	9385
chr1	94550850	94551999	94551712	7015
chr1	94557850	94558199	94558082	35206
chr1	94559050	94559299	94559092	37264
chr1	94599800	94600199	94600072	31223
chr1	94601050	94601199	94601157	52647
chr1	94608200	94609599	94608762	1502
chr1	94615400	94615599	94615492	47347
chr1	94616000	94617099	94616837	4036
chr1	94617300	94618099	94617627	12287
chr1	94640550	94641299	94640927	14097
chr1	94641900	94643099	94642567	5003
chr1	94647600	94648449	94648182	7104
chr1	94648750	94649799	94649057	7360
chr1	94650700	94651749	94651192	2535
chr1	94652250	94652749	94652477	29146
chr1	94657900	94658549	94658362	16461
chr1	94663600	94664749	94664087	8094
chr1	94664900	94666099	94665487	3005
chr1	94666650	94667499	94667127	4066
chr1	94667700	94667799	94667787	59448
chr1	94669100	94669899	94669357	25723
chr1	94670350	94670999	94670647	17060
chr1	94672050	94672749	94672352	4624
chr1	94682850	94683799	94683462	1918
chr1	94684150	94684599	94684247	45147
chr1	94695850	94696049	94696037	55018
chr1	94696650	94697099	94696947	43683
chr1	94698900	94699199	94698992	35162
chr1	94712100	94712849	94712652	3323
chr1	94715750	94716249	94716032	33180
chr1	94730050	94730599	94730457	20606
chr1	94737650	94738149	94738007	7482
chr1	94738600	94738999	94738622	23197
chr1	94806150	94806899	94806462	20257
chr1	94832350	94832699	94832532	32910
chr1	94843900	94844199	94844087	48816
chr1	94852400	94852849	94852757	10928
chr1	94868800	94868949	94868912	55588
chr1	95079900	95080749	95080422	3946
chr1	95081300	95081999	95081617	37200
chr1	95082150	95082399	95082152	56148
chr1	95107050	95107599	95107422	22441
chr1	95110800	95112049	95111772	14063
chr1	95117700	95118199	95117837	37252
chr1	95121200	95121999	95121677	43
chr1	95122150	95123099	95122397	3595
chr1	95142600	95142749	95142677	42736
chr1	95204300	95204499	95204302	34788
chr1	95230750	95231299	95231117	11134
chr1	95231550	95232299	95231742	8645
chr1	95241000	95241399	95241027	20290
chr1	95339800	95340849	95340587	12430
chr1	95342800	95343299	95343057	22458
chr1	95373700	95373999	95373732	52572
chr1	95377150	95377949	95377532	20531
chr1	95381700	95382099	95381797	44118
chr1	95404900	95406149	95405792	14371
chr1	95409800	95410199	95409917	23881
chr1	95432900	95433449	95433447	29815
chr1	95442950	95445499	95443782	15588
chr1	95446000	95448499	95446982	4585
chr1	95454050	95454149	95454107	57747
chr1	95454450	95454649	95454647	58880
chr1	95461100	95461249	95461192	54544
chr1	95462600	95463449	95463127	18854
chr1	95464600	95464799	95464657	51526
chr1	95465050	95465349	95465262	54336
chr1	95491500	95493199	95492407	5171
chr1	95514600	95515799	95515027	900
chr1	95530400	95530799	95530642	26316
chr1	95575400	95575499	95575442	55118
chr1	95645250	95645849	95645592	23948
chr1	95650000	95650349	95650007	16488
chr1	95699400	95699599	95699417	49420
chr1	95701250	95701849	95701457	15077
chr1	95721200	95721299	95721202	59058
chr1	96771250	96771499	96771282	44604
chr1	99556150	99556399	99556397	50098
chr1	99655700	99656249	99655957	6492
chr1	99656950	99657649	99657362	6011
chr1	99665000	99665349	99665292	28950
chr1	99698850	99698999	99698997	29786
chr1	99934850	99935249	99935247	44791
chr1	99938200	99938999	99938572	34488
[truncated: 57,924 more rows]

## Sheet: S6. H3K4me1-flanked Regions 
chr	start	end
chr1	3892549	3893900
chr1	4864549	4864800
chr1	6205999	6206550
chr1	8734699	8735350
chr1	9736599	9737050
chr1	9805499	9806800
chr1	9829299	9829750
chr1	10495749	10496000
chr1	10561099	10561600
chr1	10761649	10762000
chr1	10762199	10762850
chr1	10767949	10768650
chr1	10773799	10773950
chr1	10783849	10784750
chr1	10786899	10787350
chr1	10827349	10827600
chr1	10888849	10889000
chr1	10895449	10896000
chr1	12388599	12388900
chr1	13160799	13161550
chr1	13576099	13576600
chr1	13576799	13577400
chr1	13705249	13706200
chr1	13742549	13743000
chr1	13743399	13743750
chr1	13851099	13851650
chr1	13991849	13992150
chr1	14043349	14043850
chr1	14170549	14170950
chr1	14177849	14178150
chr1	14222899	14223550
chr1	14263799	14264450
chr1	14266949	14267300
chr1	14267549	14268850
chr1	14277499	14277900
chr1	14282149	14282850
chr1	14288149	14288550
chr1	15926349	15927050
chr1	16112799	16113500
chr1	16192299	16192400
chr1	16206599	16207050
chr1	16530699	16531200
chr1	16623749	16624400
chr1	16645049	16645250
chr1	19940899	19941800
chr1	19964199	19964550
chr1	20058399	20058900
chr1	20059149	20060200
chr1	20998799	20999300
chr1	21004699	21004950
chr1	21024199	21024450
chr1	21042749	21043250
chr1	21060499	21061700
chr1	21066949	21067400
chr1	21067549	21067950
chr1	23124299	23124850
chr1	23195949	23196050
chr1	23197299	23197900
chr1	23208949	23210250
chr1	23228249	23228800
chr1	23267549	23267900
chr1	23268599	23269500
chr1	23269799	23270350
chr1	23271849	23272150
chr1	23272799	23273450
chr1	23274249	23274550
chr1	23275099	23276500
chr1	23899199	23899600
chr1	23918149	23918350
chr1	23919699	23920200
chr1	24232249	24233000
chr1	24233299	24234000
chr1	24423549	24424300
chr1	33812949	33813550
chr1	33849999	33850350
chr1	33954499	33955650
chr1	33955999	33956350
chr1	34064949	34066400
chr1	34069999	34070500
chr1	34075749	34076150
chr1	34077299	34078150
chr1	34083499	34083850
chr1	34097699	34097850
chr1	34097999	34098100
chr1	34098449	34099000
chr1	34099599	34100200
chr1	34100749	34100950
chr1	34101749	34101850
chr1	34104149	34104700
chr1	34109799	34110600
chr1	34117299	34117600
chr1	34195949	34196350
chr1	34197049	34197550
chr1	34197749	34197850
chr1	34207349	34208250
chr1	34211599	34212400
chr1	34446299	34447050
chr1	35770599	35771250
chr1	36087099	36087550
chr1	36186349	36186850
chr1	36367599	36368000
chr1	36382699	36383550
chr1	36384199	36384800
chr1	36390049	36390450
chr1	36527699	36529150
chr1	36530749	36531050
chr1	36531549	36531700
chr1	36532299	36532700
chr1	36548149	36548600
chr1	36549149	36549700
chr1	36573149	36574600
chr1	36596099	36596400
chr1	36619899	36620350
chr1	36620499	36621250
chr1	36621499	36622800
chr1	36626449	36627000
chr1	36627299	36628700
chr1	36645949	36646100
chr1	36652899	36653350
chr1	36683649	36684050
chr1	36685549	36685800
chr1	36694849	36695100
chr1	36702899	36703350
chr1	36727849	36729050
chr1	36729599	36730100
chr1	36994049	36994700
chr1	37407699	37408000
chr1	37595349	37596700
chr1	38006449	38007100
chr1	38007499	38007750
chr1	38011599	38012050
chr1	38012349	38013450
chr1	38069049	38069450
chr1	38184649	38185300
chr1	38288949	38289400
chr1	38289749	38289950
chr1	38317499	38317950
chr1	38319249	38319450
chr1	38320249	38320350
chr1	38343249	38343750
chr1	38365049	38365400
chr1	38449949	38450700
chr1	38451249	38451700
chr1	38452049	38452450
chr1	38455149	38455550
chr1	38456099	38456750
chr1	38458549	38459100
chr1	38469899	38470300
chr1	38482599	38482800
chr1	38483649	38484050
chr1	38493449	38493600
chr1	38495699	38495950
chr1	38497349	38498000
chr1	38498199	38498300
chr1	38507549	38508200
chr1	38519799	38520850
chr1	38527149	38527500
chr1	38527799	38527950
chr1	38532399	38533100
chr1	38605199	38605750
chr1	38609899	38610300
chr1	38619599	38620150
chr1	38662099	38662250
chr1	38663899	38664200
chr1	38664849	38665250
chr1	38667599	38668300
chr1	38668999	38669350
chr1	38737699	38738200
chr1	38848149	38848650
chr1	39585699	39586200
chr1	39610199	39610350
chr1	39612599	39613300
chr1	39692849	39693750
chr1	39703099	39703700
chr1	39743349	39743900
chr1	39748499	39748850
chr1	39752599	39753400
chr1	39755249	39755750
chr1	39792749	39793450
chr1	39798199	39798450
chr1	39815199	39815500
chr1	39816349	39816800
chr1	39817449	39818050
chr1	39818149	39819250
chr1	39854249	39855300
chr1	39862499	39862850
chr1	39895649	39896200
chr1	39945599	39946050
chr1	39977899	39978500
chr1	39980049	39980450
chr1	39981049	39981500
chr1	39987849	39988500
chr1	39989149	39989400
chr1	39989799	39990400
chr1	39991299	39991950
chr1	39992449	39993750
chr1	39998699	39999250
chr1	40003399	40004050
chr1	40004649	40004950
chr1	40007099	40007300
chr1	40011899	40012600
chr1	40013099	40013200
chr1	40041799	40042250
chr1	40090599	40091450
chr1	43184699	43185700
chr1	43394999	43395650
chr1	43417649	43417850
chr1	43520699	43521500
chr1	43521599	43522600
chr1	43522749	43524100
chr1	43540249	43540650
chr1	43550449	43551000
chr1	43560899	43561550
chr1	43605749	43605900
chr1	43640449	43640900
chr1	43789549	43789700
chr1	43878799	43879400
chr1	44611549	44611950
chr1	44624399	44624650
chr1	44632199	44633350
chr1	44639699	44640700
chr1	44641549	44642500
chr1	44643999	44644350
chr1	44644449	44645050
chr1	44645249	44645750
chr1	44645949	44646150
chr1	44648499	44649600
chr1	44681599	44682250
chr1	44682349	44683100
chr1	44842099	44842900
chr1	45561199	45561950
chr1	45883899	45884000
chr1	45894399	45895100
chr1	45909699	45910250
chr1	45915799	45916300
chr1	45916849	45917600
chr1	45961949	45962550
chr1	51091399	51091700
chr1	51133249	51133500
chr1	51154599	51155400
chr1	51156149	51157150
chr1	51202149	51203050
chr1	51323099	51324000
chr1	51363749	51363950
chr1	51364049	51364200
chr1	51364449	51365200
chr1	51550399	51551000
chr1	51561299	51561500
chr1	51562949	51564300
chr1	51565399	51566400
chr1	51578499	51578850
chr1	51588249	51588900
chr1	51845299	51845450
chr1	51846149	51846750
chr1	51876649	51877100
chr1	51878349	51879400
chr1	51929849	51929950
chr1	51930049	51930800
chr1	51931549	51932050
chr1	51963899	51964000
chr1	51965049	51966300
chr1	51993599	51993950
chr1	52287449	52287750
chr1	52311249	52311700
chr1	52336449	52336800
chr1	52652299	52652900
chr1	53797599	53798350
chr1	54041899	54042650
chr1	54769649	54770800
chr1	54870099	54870900
chr1	54883449	54883800
chr1	54921349	54921950
chr1	54922449	54923300
chr1	54923899	54924950
chr1	55146599	55146900
chr1	55297049	55297600
chr1	56975449	56976200
chr1	57116049	57116550
chr1	57152949	57153200
chr1	57300699	57300800
chr1	57434049	57435400
chr1	58054399	58054650
chr1	58064349	58064850
chr1	58342399	58342850
chr1	58483599	58483750
chr1	58484599	58485050
chr1	58486699	58486850
chr1	58540649	58540800
chr1	58673749	58674150
chr1	58772799	58773750
chr1	58774249	58774500
chr1	58780449	58781500
chr1	58799299	58799600
chr1	59017999	59018800
chr1	59020599	59021050
chr1	59025599	59025950
chr1	59094499	59094750
chr1	59224549	59224750
chr1	59341099	59341500
chr1	59344599	59344800
chr1	59355099	59356050
chr1	59505349	59506800
chr1	59514499	59514900
chr1	59515099	59516050
chr1	59521999	59522700
chr1	59544349	59544750
chr1	59627699	59628450
chr1	59635849	59637150
chr1	59743799	59744700
chr1	59782549	59783100
chr1	59809099	59810050
chr1	59824299	59824800
chr1	59890299	59890800
chr1	59904849	59905200
chr1	59956849	59957300
chr1	59957449	59957650
chr1	60057249	60057500
chr1	60417599	60418900
chr1	60458649	60459000
chr1	60801899	60802500
chr1	60802649	60803000
chr1	60819799	60819950
chr1	60822099	60822750
chr1	60824949	60826150
chr1	60861099	60861550
chr1	60873699	60873900
chr1	60874449	60875400
chr1	60881449	60881700
chr1	60882149	60883250
chr1	60890049	60890950
chr1	60907999	60908750
chr1	60909849	60910050
chr1	62745049	62745400
chr1	62748249	62749000
chr1	62759199	62760100
chr1	62765299	62765450
chr1	62769449	62770800
chr1	62771299	62771850
chr1	62782599	62783200
chr1	62785249	62785650
chr1	62789799	62790450
chr1	62796699	62796850
chr1	62797849	62798100
chr1	62803299	62803750
chr1	62838749	62838950
chr1	62980099	62980250
chr1	62980349	62980600
chr1	63022949	63023500
chr1	63033849	63034550
chr1	63237549	63237750
chr1	63238399	63238700
chr1	63239349	63239550
chr1	63755349	63755800
chr1	63822999	63823800
chr1	63866499	63866700
chr1	63984649	63985250
chr1	63985349	63985450
chr1	64067049	64068300
chr1	64078349	64078600
chr1	64147999	64148200
chr1	64158049	64158350
chr1	64184299	64184550
chr1	64582099	64582400
chr1	64582699	64583050
chr1	64583449	64583550
chr1	64584199	64584750
chr1	64585399	64585950
chr1	64592699	64593300
chr1	64648749	64649850
chr1	64650149	64651150
chr1	64757999	64758550
chr1	64758649	64758850
chr1	64803249	64803950
chr1	64864249	64864500
chr1	64872899	64873400
chr1	64893949	64894400
chr1	64897249	64897400
chr1	64898249	64898450
chr1	64899449	64899850
chr1	64921849	64922100
chr1	64963999	64965150
chr1	66663549	66664100
chr1	70119699	70120600
chr1	70128749	70129650
chr1	70180299	70181600
chr1	70181799	70182400
chr1	71146799	71147950
chr1	71382799	71383200
chr1	71383449	71384000
chr1	71384099	71385050
chr1	71385949	71386100
chr1	71736499	71736750
chr1	71738099	71738450
chr1	71810149	71810500
chr1	71927049	71927900
chr1	71956149	71956750
chr1	71957599	71958000
chr1	71958249	71959200
chr1	71963549	71964100
chr1	71983899	71984950
chr1	72053299	72053950
chr1	72065049	72065500
chr1	72116149	72117100
chr1	72356149	72357200
chr1	72357749	72357950
chr1	72418949	72419350
chr1	72429599	72430150
chr1	72430849	72431350
chr1	72460949	72461700
chr1	72475149	72476200
chr1	72508899	72509300
chr1	72512099	72512450
chr1	72537349	72537500
chr1	72681699	72681850
chr1	72800899	72801700
chr1	72802249	72802750
chr1	72825999	72826800
chr1	72879949	72880050
chr1	72880299	72880500
chr1	72925049	72925650
chr1	73085399	73085800
chr1	73106999	73107400
chr1	73288749	73289650
chr1	74222199	74222750
chr1	74227399	74227900
chr1	74289499	74290250
chr1	74346449	74346950
chr1	74347499	74348100
chr1	74348349	74348750
chr1	74380949	74381200
chr1	74532349	74532750
chr1	74818199	74819100
chr1	74859649	74860950
chr1	74861499	74861800
chr1	75206899	75208050
chr1	75389499	75389900
chr1	75395199	75396000
chr1	75396349	75397700
chr1	76072299	76072700
chr1	77975199	77975800
chr1	78006399	78007650
chr1	78007999	78009350
chr1	78010999	78012100
chr1	78012999	78013350
chr1	78054449	78055000
chr1	78056899	78057350
chr1	78057649	78057750
chr1	78061299	78061750
chr1	78063499	78064050
chr1	78065549	78066300
chr1	78086299	78086450
chr1	78086649	78086800
chr1	78114399	78115200
chr1	78115599	78116150
chr1	78121299	78121550
chr1	78134549	78135250
chr1	78136449	78136750
chr1	78137049	78137250
chr1	78137599	78138650
chr1	78139199	78139300
chr1	78139949	78140150
chr1	78142849	78143000
chr1	78151099	78151500
chr1	78153749	78154200
chr1	78156149	78156650
chr1	78164549	78164750
chr1	78164999	78165300
chr1	78169849	78170200
chr1	78170749	78171250
chr1	78171499	78171650
chr1	78174399	78174800
chr1	78177349	78177650
chr1	78182749	78182850
chr1	78182999	78184050
chr1	78344099	78344500
chr1	78344949	78345150
chr1	78392299	78393150
chr1	78420199	78420450
chr1	78436749	78437150
chr1	78444699	78444950
chr1	78447899	78448400
chr1	78459349	78459850
chr1	78480949	78481500
chr1	78481649	78482050
chr1	78482999	78483300
chr1	78545799	78546300
chr1	78583499	78583900
chr1	78584199	78584550
chr1	78645799	78646350
chr1	78651449	78652050
chr1	78698799	78700000
chr1	78701399	78702050
chr1	78712349	78712650
chr1	78904349	78904900
chr1	79728249	79729050
chr1	79732049	79732200
chr1	79734949	79735650
chr1	79746049	79747000
chr1	79747749	79748250
chr1	79753199	79753500
chr1	79759399	79760250
chr1	79857949	79858250
chr1	79881849	79882300
chr1	79974799	79975300
chr1	80015199	80015550
chr1	80020299	80020400
chr1	80020849	80021300
chr1	80036049	80036200
chr1	80234199	80235450
chr1	80323649	80324000
chr1	80328349	80329600
chr1	80329949	80330300
chr1	80633649	80634200
chr1	81615599	81616000
chr1	81734749	81735700
chr1	81741999	81742900
chr1	81855699	81856700
chr1	81909899	81910550
chr1	81949099	81949500
chr1	81949949	81950900
chr1	81958749	81959500
chr1	81963349	81963950
chr1	81964349	81965050
chr1	81990299	81990650
chr1	82005049	82005650
chr1	82036999	82037450
chr1	82037849	82038600
chr1	82106749	82107300
chr1	82152449	82152950
chr1	82196749	82197250
chr1	82270849	82271000
chr1	82355099	82356450
chr1	82425749	82426000
chr1	82697799	82698400
chr1	82805199	82805550
chr1	82830749	82831650
chr1	82901449	82901550
chr1	82915899	82916500
chr1	83269299	83269400
chr1	84852399	84852600
chr1	84854099	84854750
chr1	87695149	87696150
chr1	88334649	88335400
chr1	88402449	88403150
chr1	88518999	88519200
chr1	88539799	88540700
chr1	88730799	88731000
chr1	88731149	88731650
chr1	88882199	88882400
chr1	88894549	88895100
chr1	88900199	88900400
chr1	88904449	88904850
chr1	88925449	88925600
chr1	88930099	88930950
chr1	88932549	88932650
chr1	89151499	89151600
chr1	89170199	89170650
chr1	89183849	89184000
chr1	89368799	89369000
chr1	89618749	89618900
chr1	89736849	89737350
chr1	89743649	89744000
chr1	89744749	89744900
chr1	89745899	89746000
chr1	89746549	89746950
chr1	89768799	89770250
chr1	89777199	89778350
chr1	89810199	89810400
chr1	90030599	90031450
chr1	90031999	90032300
chr1	90370949	90371550
chr1	90372149	90372600
chr1	90519999	90520550
chr1	90733349	90734050
chr1	90734349	90735450
chr1	90736599	90737150
chr1	90891799	90892350
chr1	90909099	90909550
chr1	90976449	90976650
chr1	91006649	91007400
chr1	91007549	91008950
chr1	91026749	91027600
chr1	91032549	91033000
chr1	91033399	91034250
chr1	91414399	91414750
chr1	91415349	91415850
chr1	91465749	91466450
chr1	91467199	91467300
chr1	91596699	91597200
chr1	91606799	91607150
chr1	91683149	91683350
chr1	91764849	91765500
chr1	91831049	91831550
chr1	92104299	92104400
chr1	92125849	92126100
chr1	92128149	92128600
chr1	92174699	92174900
chr1	92175299	92176350
chr1	92649749	92650200
chr1	92650699	92651000
chr1	92667649	92667750
chr1	92667949	92668050
chr1	92687049	92687300
chr1	92806099	92806850
chr1	92820449	92821800
chr1	92850549	92850650
chr1	92851349	92851750
chr1	92867849	92868200
chr1	92869549	92870150
chr1	92871349	92871850
chr1	92919749	92919950
chr1	92920599	92921300
chr1	92946449	92947550
chr1	92947999	92948700
chr1	92956599	92956700
chr1	92957699	92958050
chr1	92959799	92960200
chr1	92961749	92962050
chr1	92976449	92976950
chr1	93136199	93136700
chr1	93149799	93151050
chr1	93155499	93156200
chr1	93168799	93169050
chr1	93209849	93210250
chr1	93248549	93249150
chr1	93355599	93356800
chr1	93388399	93389550
chr1	93389849	93390450
chr1	93390999	93391950
chr1	93619749	93619850
chr1	93721849	93722300
chr1	93841299	93841700
chr1	93852949	93853250
chr1	93859649	93860500
chr1	93870599	93870900
chr1	93902449	93903150
chr1	93917399	93918050
chr1	93918549	93919050
chr1	93919349	93919550
chr1	93932249	93933100
chr1	93934899	93935200
chr1	93936599	93937050
chr1	93938399	93939600
chr1	93946099	93947250
chr1	93948849	93949700
chr1	93950999	93951300
chr1	93951549	93951950
chr1	93953449	93953800
chr1	93953949	93955100
chr1	93955299	93955650
chr1	93957999	93958650
chr1	93959649	93960700
chr1	93968949	93969600
chr1	93969799	93970700
chr1	93971949	93972350
chr1	93973949	93974450
chr1	93974649	93975050
chr1	93975349	93975750
chr1	93976849	93977100
chr1	93983449	93983750
chr1	93994249	93995100
chr1	93995199	93995750
chr1	94001749	94002800
chr1	94003199	94003400
chr1	94004249	94004700
chr1	94011399	94011600
chr1	94027049	94027400
chr1	94033199	94033850
chr1	94037999	94038750
chr1	94069649	94070100
chr1	94072649	94073150
chr1	94148599	94149150
chr1	94275749	94276400
chr1	94334399	94335000
chr1	94369599	94371000
chr1	94523999	94524450
chr1	94531749	94532200
chr1	94541549	94541700
chr1	94544449	94545850
chr1	94546899	94547300
chr1	94558199	94559050
chr1	94600199	94601050
chr1	94615599	94616000
chr1	94617099	94617300
chr1	94641299	94641900
chr1	94648449	94648750
chr1	94649799	94650700
chr1	94651749	94652250
chr1	94664749	94664900
chr1	94666099	94666650
chr1	94667499	94667700
chr1	94667799	94669100
chr1	94669899	94670350
chr1	94670999	94672050
chr1	94683799	94684150
chr1	94696049	94696650
chr1	94738149	94738600
chr1	95080749	95081300
chr1	95081999	95082150
chr1	95121999	95122150
chr1	95231299	95231550
chr1	95445499	95446000
chr1	95454149	95454450
chr1	95461249	95462600
chr1	95463449	95464600
chr1	95464799	95465050
chr1	99656249	99656950
chr1	106549099	106549450
chr1	106744649	106745300
chr1	107558049	107558650
chr1	107579249	107579750
chr1	107802999	107803450
chr1	107884649	107885400
chr1	108051649	108052400
chr1	108053549	108053750
chr1	108053849	108054900
chr1	108073999	108074650
chr1	108075249	108076200
chr1	108076349	108076500
chr1	108094349	108095000
chr1	108096149	108096700
chr1	108097149	108097450
chr1	108097749	108098700
chr1	108098799	108099650
chr1	108116049	108116200
chr1	108131699	108132000
chr1	108133549	108134150
chr1	108137999	108139350
chr1	108174649	108174850
chr1	108175399	108175750
chr1	108177199	108178350
chr1	108199749	108200250
chr1	108219349	108219800
chr1	108277249	108277600
chr1	108297499	108297850
chr1	108299649	108299950
chr1	108304449	108304600
chr1	108357949	108359300
chr1	108374549	108374800
chr1	108456749	108457150
chr1	108466149	108466500
chr1	108467199	108467300
chr1	108523499	108524900
chr1	108540049	108540150
chr1	108596849	108597800
chr1	108599299	108600050
chr1	108605249	108605600
chr1	108649149	108649650
chr1	108650049	108650550
chr1	109426099	109426300
chr1	109479349	109479850
chr1	109488949	109489100
chr1	109489949	109490550
chr1	109490749	109491150
chr1	114286199	114286700
chr1	117858799	117859900
chr1	117928999	117929600
chr1	118004449	118004600
chr1	118004999	118005600
chr1	120295199	120295900
chr1	120331599	120332250
chr1	120332849	120333050
chr1	120333199	120334500
chr1	120337799	120338500
chr1	120343099	120343350
chr1	120349899	120350500
chr1	120354149	120354850
chr1	120354999	120355100
chr1	120391549	120392000
chr1	121354499	121355150
chr1	121806149	121806650
chr1	121996149	121996750
chr1	121996899	121997000
chr1	122012049	122012800
chr1	122013399	122013800
chr1	122093199	122094150
chr1	122132849	122133550
chr1	122134549	122134750
chr1	122143049	122143750
chr1	122144649	122145050
chr1	122163099	122163200
chr1	122253949	122254500
chr1	123176899	123177300
chr1	123211399	123211850
chr1	123219899	123220000
chr1	123220649	123220900
chr1	123221099	123222350
chr1	123257099	123257550
chr1	123263899	123264000
chr1	123605749	123606450
chr1	125453299	125453800
chr1	125590499	125591300
chr1	127321949	127322850
chr1	127324049	127324250
chr1	127324849	127325350
chr1	127328299	127328450
chr1	127328749	127329100
chr1	127401899	127402500
chr1	127402949	127403450
chr1	127404349	127405300
chr1	127464099	127464300
chr1	128898199	128898600
chr1	128995699	128996450
chr1	129110149	129110450
chr1	129121899	129122150
chr1	129123149	129123650
chr1	129128599	129128850
chr1	129136399	129136900
chr1	129153499	129153950
chr1	129277249	129277750
chr1	129316149	129316600
chr1	129321799	129322100
chr1	129355799	129356150
chr1	129470399	129470700
chr1	129515599	129516450
chr1	129685399	129685950
chr1	129857599	129858000
chr1	129872249	129872650
chr1	129878349	129879650
chr1	129879899	129880350
chr1	129880749	129881100
chr1	129881699	129882350
chr1	129914899	129916200
chr1	129916299	129917350
chr1	130001549	130002650
chr1	130315099	130315750
chr1	130482399	130482650
chr1	132980349	132980550
chr1	132995599	132996050
chr1	133037199	133037900
chr1	133074949	133075350
chr1	133081399	133082050
chr1	133207499	133208050
chr1	133208149	133208300
chr1	133246699	133247050
chr1	133275149	133275900
chr1	133337549	133338050
chr1	133338449	133338800
chr1	133339299	133339550
chr1	133347649	133348750
chr1	133361849	133362700
chr1	133379649	133379950
chr1	133390999	133391150
chr1	133391299	133391400
chr1	133391499	133392900
chr1	133399149	133399600
chr1	133402999	133403600
chr1	133408099	133409100
chr1	133426249	133426550
chr1	133437499	133438300
chr1	133592849	133593350
chr1	133610949	133611650
chr1	133648649	133649050
chr1	133656349	133656600
chr1	133781049	133781550
chr1	133782249	133782450
chr1	133839199	133839800
chr1	133889799	133890300
chr1	133907099	133907550
chr1	134023149	134023900
chr1	134047849	134048250
chr1	134103099	134103600
chr1	134163849	134164200
chr1	134183649	134183950
chr1	134231349	134231950
chr1	134262849	134263150
chr1	134271849	134272550
chr1	134273949	134274300
chr1	134284449	134285850
chr1	134304399	134304700
chr1	134322899	134324150
chr1	134332349	134332500
chr1	134333299	134333550
chr1	134366549	134367350
chr1	134661999	134662100
chr1	135553699	135554850
chr1	135711149	135712500
chr1	135777149	135777850
chr1	135818049	135818200
chr1	135875099	135875600
chr1	135937199	135937850
chr1	136313349	136313450
chr1	136313649	136314150
chr1	136314399	136314850
chr1	136650649	136650950
chr1	136798799	136799100
chr1	136911899	136912250
chr1	136913349	136913750
chr1	136914649	136915000
chr1	136917599	136917850
chr1	136919499	136920850
chr1	137080649	137081250
chr1	137208349	137208450
chr1	137264349	137265650
chr1	137368099	137368550
chr1	137377299	137377550
chr1	137378149	137378250
chr1	137378549	137378800
chr1	137379499	137379700
chr1	137389599	137389750
chr1	137390349	137391000
chr1	137391349	137391600
chr1	137440249	137441700
chr1	137522249	137522850
chr1	137532699	137532900
chr1	137554099	137554450
chr1	137556049	137556400
chr1	137558349	137558450
chr1	137560549	137561100
chr1	137562199	137562850
chr1	137563499	137564600
chr1	137566799	137567250
chr1	137621349	137622400
chr1	137623549	137624250
chr1	137628049	137628450
chr1	137628549	137629200
chr1	137632299	137632400
chr1	137636199	137636550
chr1	137673299	137673550
chr1	137677799	137678250
chr1	137678349	137678750
chr1	137679349	137679550
chr1	137741049	137741450
chr1	137741649	137741950
chr1	137742949	137743050
chr1	137743549	137744100
chr1	137748649	137749200
chr1	137758699	137759000
chr1	137914199	137915600
chr1	138023649	138023800
chr1	138026449	138026850
chr1	138029899	138030250
chr1	138033549	138034050
chr1	138034149	138034850
chr1	138036549	138037550
chr1	138038949	138039300
chr1	138509649	138510350
chr1	138579649	138580800
chr1	138581649	138582700
chr1	138593699	138594850
chr1	139815549	139815900
chr1	139816099	139816750
chr1	139825599	139825900
chr1	140244849	140245750
chr1	140484649	140484750
chr1	140492749	140492950
chr1	140511249	140511650
chr1	140552149	140552350
chr1	140552749	140553350
chr1	140558899	140559250
chr1	140825449	140825750
chr1	140827449	140827850
chr1	140889099	140889450
chr1	141048999	141049600
chr1	141320999	141322100
chr1	146424599	146425700
chr1	152382749	152383400
chr1	152796449	152797600
chr1	152811499	152812050
chr1	152953799	152953900
chr1	153083449	153084400
chr1	153188099	153188300
chr1	153189399	153190500
chr1	153194099	153194200
chr1	153398599	153399150
chr1	153450449	153450700
chr1	153493549	153493900
chr1	153522899	153523250
chr1	153524749	153525600
chr1	153525749	153526550
chr1	153530599	153531000
chr1	153531149	153532250
chr1	153534699	153535800
chr1	153537949	153538150
chr1	153556749	153557200
chr1	153557649	153558200
chr1	153630049	153630300
chr1	153630649	153631350
chr1	153676799	153677450
chr1	153735399	153736300
chr1	153737299	153737750
chr1	153741149	153741250
chr1	153754149	153754350
chr1	153760999	153761500
chr1	153791299	153791600
chr1	153855349	153856100
chr1	153995699	153996400
chr1	154102599	154103050
chr1	154103699	154105100
chr1	154225649	154226150
chr1	154286849	154287250
chr1	154302349	154302850
chr1	154303349	154303550
chr1	154343899	154345100
chr1	154450549	154451200
chr1	154466149	154466800
chr1	154477349	154477750
chr1	154624449	154624850
chr1	154633849	154633950
chr1	154638799	154639300
chr1	154639649	154640800
chr1	154713849	154714250
chr1	154720149	154720250
chr1	154781899	154783100
chr1	154801549	154802450
chr1	154856749	154857300
chr1	154858149	154858400
chr1	154931749	154932450
chr1	154932649	154933700
chr1	154939249	154939700
chr1	154944499	154945000
chr1	154945749	154946150
chr1	155020799	155020900
chr1	155112149	155112750
chr1	155123249	155124000
chr1	155124999	155125600
chr1	155129599	155129800
chr1	155129899	155130050
chr1	155139349	155140150
chr1	155140699	155141300
chr1	155146099	155146550
chr1	155155349	155156200
chr1	155201549	155202050
chr1	155411899	155412300
chr1	155412749	155413100
chr1	155419649	155420300
chr1	155482899	155483200
chr1	155673749	155674300
chr1	155683149	155683800
chr1	155693749	155694550
chr1	155809099	155809900
chr1	155825499	155825850
chr1	155834699	155835400
chr1	155844199	155844750
chr1	156003549	156004300
chr1	156897499	156898600
chr1	156930349	156931050
chr1	156981399	156981700
chr1	157043199	157043700
chr1	157050599	157051200
chr1	157889799	157889900
chr1	157890149	157890650
chr1	157893199	157893850
chr1	157903999	157904950
chr1	158401299	158402050
chr1	158544249	158545150
chr1	158548599	158549800
chr1	158550049	158550400
chr1	158569449	158570000
chr1	158609649	158610250
chr1	158640749	158640950
chr1	158641149	158642000
chr1	158651449	158651850
chr1	158652199	158652700
chr1	161011899	161012300
chr1	161323299	161324100
chr1	161983249	161983650
chr1	161987949	161988100
chr1	163003099	163003850
chr1	163797699	163797900
chr1	163798599	163799000
chr1	163885549	163885800
chr1	163929849	163930650
chr1	164116999	164117400
chr1	164127049	164127300
chr1	164460799	164461300
chr1	164461849	164462300
chr1	164493699	164493850
chr1	164493999	164494150
chr1	164494249	164494500
chr1	164531149	164531550
chr1	165111949	165112450
chr1	165128249	165128650
chr1	165321199	165321850
chr1	165584899	165585800
chr1	165585899	165586550
chr1	165587399	165587750
chr1	165588149	165588550
chr1	166277399	166277750
chr1	166349299	166350100
chr1	167088549	167089450
chr1	167274799	167275050
chr1	167382899	167383400
chr1	167494099	167494550
chr1	167517749	167518350
chr1	167519299	167519450
chr1	167539399	167540050
chr1	167540549	167541300
chr1	167546949	167547800
chr1	167549399	167549950
chr1	167592799	167593200
chr1	167699349	167699600
chr1	167930399	167930850
chr1	171292699	171293000
chr1	171601749	171602600
chr1	171692699	171692950
chr1	171778549	171779050
chr1	171879999	171880450
chr1	172635299	172635750
chr1	172705049	172705550
chr1	172783299	172784100
chr1	172784849	172785350
chr1	172785649	172786050
chr1	172819399	172819850
chr1	172865649	172866250
chr1	172897899	172898000
chr1	173018799	173018900
chr1	173024549	173024850
chr1	173079099	173079450
chr1	173160949	173161100
chr1	173161799	173162600
chr1	173179349	173179650
chr1	173180149	173181400
chr1	173191949	173192350
chr1	173192599	173193600
chr1	173217299	173218450
chr1	173400449	173401200
chr1	174063499	174064250
chr1	174069999	174070600
chr1	174172549	174173050
chr1	174373449	174374000
chr1	174411949	174412500
chr1	178178499	178179100
chr1	178710049	178710200
chr1	178710599	178711050
chr1	178713199	178714200
chr1	178726699	178727300
chr1	178727499	178727700
chr1	178727799	178728800
chr1	178730399	178731800
chr1	178732499	178733100
chr1	178733599	178734050
chr1	178734399	178734850
chr1	178735099	178735650
chr1	178736799	178737800
chr1	178748299	178748750
chr1	178750999	178752150
chr1	178752499	178753850
chr1	178757699	178758100
chr1	178944399	178944700
chr1	179177949	179179400
chr1	179489449	179490000
chr1	179490699	179491000
chr1	179553449	179553850
chr1	179554399	179554800
chr1	179573099	179573600
chr1	179578999	179579550
chr1	179632549	179633900
chr1	180251149	180251450
chr1	180355499	180355950
chr1	180722249	180722800
chr1	180871699	180872150
chr1	180928099	180928450
chr1	180972049	180972450
chr1	180973449	180973750
chr1	180990249	180990650
chr1	180990749	180991100
chr1	180992099	180992400
chr1	181024649	181025450
chr1	181069599	181070200
chr1	181071399	181071850
chr1	181107749	181108000
chr1	181407049	181407850
chr1	181408899	181410050
chr1	181410349	181410800
chr1	181411149	181411600
chr1	181501299	181501850
chr1	181502699	181502950
chr1	181503599	181504200
chr1	181514299	181514800
chr1	181515549	181516350
chr1	181594399	181595400
chr1	181777749	181778550
chr1	181803899	181804450
chr1	181821049	181821450
chr1	181898549	181899350
chr1	181900199	181901550
chr1	181913099	181913300
chr1	181951949	181952400
chr1	182129699	182130050
chr1	182194899	182195800
chr1	182210549	182210700
chr1	182214449	182214650
chr1	182219649	182220300
chr1	182237999	182238100
chr1	182264549	182265000
chr1	182274899	182275500
chr1	182295249	182296000
chr1	182311699	182312250
chr1	182316949	182318100
chr1	182321249	182322600
chr1	182323649	182323850
chr1	182334049	182334500
chr1	182351649	182352150
chr1	182353599	182353700
chr1	182500749	182500900
chr1	182768149	182768500
chr1	182874949	182876100
chr1	182911999	182912300
chr1	182913099	182913200
chr1	182938799	182939350
chr1	182939849	182940150
chr1	183161149	183162400
chr1	183219349	183219600
chr1	183957749	183958150
chr1	184298349	184299550
chr1	184350599	184351250
chr1	184388599	184389350
chr1	184405149	184405550
chr1	184431799	184432200
chr1	184434949	184436000
chr1	184443749	184444100
chr1	184444399	184444550
chr1	184444949	184445300
chr1	184449699	184450850
chr1	184457599	184457700
chr1	185334549	185335550
chr1	185397699	185398250
chr1	185535699	185536100
chr1	185601999	185602950
chr1	185606799	185607150
chr1	185607749	185608050
chr1	185613099	185613650
chr1	185614349	185614700
chr1	185616049	185616550
chr1	185625899	185626250
chr1	185626499	185627250
chr1	185627499	185628000
chr1	185663749	185663850
chr1	185686799	185688100
chr1	185688949	185689500
chr1	185699049	185700000
chr1	185703049	185703400
chr1	185729399	185729800
chr1	185788349	185789600
chr1	185860849	185861650
chr1	185874649	185874950
chr1	185884149	185884600
chr1	185890749	185891000
chr1	185900099	185901000
chr1	185906499	185907450
chr1	185908249	185909250
chr1	186606099	186606250
chr1	187024799	187025400
chr1	187158899	187159600
chr1	187160249	187160800
chr1	187189799	187190050
chr1	187191199	187191400
chr1	187232249	187232650
chr1	187417149	187417800
chr1	188410399	188410750
chr1	188433499	188434250
chr1	188506499	188506950
chr1	189050249	189051050
chr1	189058849	189059400
chr1	189060149	189061000
chr1	189649749	189649900
chr1	190928399	190929050
chr1	191019599	191020300
chr1	191026499	191027000
chr1	191056149	191056700
chr1	191182599	191183000
chr1	191183749	191184300
chr1	191185299	191185800
chr1	191186099	191186350
chr1	191555499	191556100
chr1	191567199	191567850
chr1	191568099	191568450
chr1	191571649	191572400
chr1	191594149	191594350
chr1	191601749	191602300
chr1	191624149	191624650
chr1	191673549	191674000
chr1	191739649	191740300
chr1	191742349	191743250
chr1	193052899	193053200
chr1	193054199	193054750
chr1	193063499	193063600
chr1	193083049	193083200
chr1	193083949	193084550
chr1	193085499	193085950
chr1	193091599	193092050
chr1	193113449	193114450
chr1	193116099	193116550
chr1	193117649	193118000
chr1	193118399	193118850
chr1	193241699	193242850
chr1	193254199	193254400
chr1	193452799	193452900
chr1	193899699	193900250
chr1	193900399	193900900
chr1	193901199	193901300
chr1	194277399	194277550
chr1	195015349	195016000
chr1	195089699	195090000
chr1	195340049	195340500
chr1	195348299	195348900
chr1	196336049	196336600
chr1	196415349	196415600
chr1	196497899	196498400
chr1	196607949	196608050
chr1	196703899	196704350
chr1	196704599	196704900
chr1	197049149	197049250
chr1_random	5049	5700
chr1_random	10949	11350
chr1_random	65449	65700
chr1_random	69349	70750
chr1_random	71549	71650
chr1_random	273599	274050
chr1_random	274749	275150
chr1_random	275949	276500
chr1_random	424049	424550
chr10	5932399	5932900
chr10	5955449	5956300
chr10	6189899	6190150
chr10	6265849	6267200
chr10	6267349	6267550
chr10	6280199	6280700
chr10	6370349	6371600
chr10	6374549	6374800
chr10	6375749	6376350
chr10	6379499	6379650
chr10	6451149	6452150
chr10	6455299	6456450
chr10	6457549	6458150
chr10	6459649	6459750
chr10	6459849	6460250
chr10	6460949	6461600
chr10	6566399	6567100
chr10	6571549	6572100
chr10	6986699	6986900
chr10	7394449	7395150
chr10	7403049	7404450
chr10	7456499	7456900
chr10	7672149	7672300
chr10	7827249	7827800
chr10	7858499	7858900
chr10	8409799	8410000
chr10	8476999	8478250
chr10	8524649	8525450
chr10	8603899	8604450
chr10	8692399	8693150
chr10	8879999	8880750
chr10	8992949	8993050
chr10	9014749	9015000
chr10	9208499	9209450
chr10	9216799	9217050
chr10	9223249	9224150
chr10	9249049	9249200
chr10	9249549	9250900
chr10	9251599	9253050
chr10	9577199	9577750
chr10	9577999	9578300
chr10	9579149	9579700
chr10	9599949	9600650
chr10	9601249	9602050
chr10	10094249	10094750
chr10	10109899	10111200
chr10	10164399	10164950
chr10	10181999	10182250
chr10	10185899	10186300
chr10	10191399	10192700
chr10	10268949	10269050
chr10	10275149	10275650
chr10	10522699	10523400
chr10	12160199	12160850
chr10	12273049	12273700
chr10	12414449	12414950
chr10	12423199	12423400
chr10	12463049	12463550
chr10	12507399	12508300
chr10	12511649	12512100
chr10	12519599	12520700
chr10	12521249	12521450
chr10	12522549	12523450
chr10	12551599	12551900
chr10	12557399	12557950
chr10	12577849	12578000
chr10	12578549	12578850
chr10	12579349	12580550
chr10	12819549	12819650
chr10	12823449	12823650
chr10	12823899	12824500
chr10	12826099	12826650
chr10	12827899	12828750
chr10	12945549	12946000
chr10	13008099	13008300
chr10	13038799	13039150
chr10	13041199	13041850
chr10	13066299	13066800
chr10	13704649	13705150
chr10	13737549	13738950
chr10	13761799	13762050
chr10	13762499	13763300
chr10	13763949	13765400
chr10	13765899	13766300
chr10	13775599	13775950
chr10	14037149	14037900
chr10	14052449	14053000
chr10	14054949	14055900
chr10	14357949	14359100
chr10	14423699	14424250
chr10	15310799	15310950
chr10	16265149	16265850
chr10	16732149	16732750
chr10	16757649	16757900
chr10	16758299	16758850
chr10	17075849	17076100
chr10	17414349	17414950
chr10	17446499	17446800
chr10	17778049	17778150
chr10	17788149	17789200
chr10	17790049	17790650
chr10	17801049	17802000
chr10	18042649	18043050
chr10	18054249	18055500
chr10	18174199	18174650
chr10	18174849	18175500
chr10	18202549	18203750
chr10	18228949	18230000
chr10	18249299	18250000
chr10	19214149	19215100
chr10	19656949	19657350
chr10	19943349	19943750
chr10	19944449	19944800
chr10	20030599	20031050
chr10	20187399	20187600
chr10	20392349	20392550
chr10	20456649	20457350
chr10	20691049	20691750
chr10	20692099	20692900
chr10	20748699	20749200
chr10	21023849	21025200
chr10	21119499	21120200
chr10	21120449	21121100
chr10	21246549	21246950
chr10	21252549	21253200
chr10	21314499	21314850
chr10	21559199	21559400
chr10	22846249	22847250
chr10	22864399	22864850
chr10	23277549	23278150
chr10	23278749	23280150
chr10	23289099	23289850
chr10	23395499	23396000
chr10	23852099	23852700
chr10	23852799	23853900
chr10	23871049	23871550
chr10	23871899	23872100
chr10	23877649	23878800
chr10	23879399	23879600
chr10	23882499	23883200
chr10	23883349	23883650
chr10	23885549	23885800
chr10	23891999	23892450
chr10	23892649	23892750
chr10	23930399	23931200
chr10	24218449	24219200
chr10	24384299	24384600
chr10	24484849	24485100
chr10	24939599	24940900
chr10	24980999	24982000
chr10	25014949	25015600
chr10	25085399	25085850
chr10	25087399	25087800
chr10	25091699	25091800
chr10	25105299	25105950
chr10	25113449	25113550
chr10	25122849	25123200
chr10	25131299	25132450
chr10	25145699	25146150
chr10	25146249	25146650
chr10	25147449	25148600
chr10	25166849	25167200
chr10	25167999	25168300
chr10	25168849	25169800
chr10	25171399	25172200
chr10	25246699	25247400
chr10	26015349	26015800
chr10	26264649	26265000
chr10	27107249	27107800
chr10	27231699	27233000
chr10	27304049	27304250
chr10	27310949	27311600
chr10	27354249	27354900
chr10	27394049	27394700
chr10	28371199	28371400
chr10	28371899	28372300
chr10	28379849	28380350
chr10	28380999	28381400
chr10	30433199	30434450
chr10	30510299	30510800
chr10	30892449	30892600
chr10	31048199	31048700
chr10	31110649	31110950
chr10	31166799	31167500
chr10	31311749	31312450
chr10	31312999	31313450
chr10	31324799	31325700
chr10	31325799	31326250
chr10	32209299	32210200
chr10	33670299	33671600
chr10	33766999	33768000
chr10	33768599	33769100
chr10	33769299	33769650
chr10	33809399	33809700
chr10	33868449	33868650
chr10	33905699	33906300
chr10	33906649	33907600
chr10	33918099	33918450
chr10	33991499	33992000
chr10	34003349	34003650
chr10	36890399	36891000
chr10	36909299	36910250
chr10	36940799	36941000
chr10	36941999	36942200
chr10	36954199	36954500
chr10	36970649	36971050
chr10	37067899	37068500
chr10	37334699	37335100
chr10	37346499	37347250
chr10	38077399	38078450
chr10	38443449	38443900
chr10	38568599	38569600
chr10	38700499	38701000
chr10	38702399	38703600
chr10	38703849	38704300
chr10	38714249	38715050
chr10	38742199	38742650
chr10	38743149	38743500
chr10	38759299	38760250
chr10	38764449	38764850
chr10	39091299	39091800
chr10	39095549	39095800
chr10	39137399	39137850
chr10	39141099	39141350
chr10	39151549	39152050
chr10	39152849	39153250
chr10	39154649	39154950
chr10	39170849	39171450
chr10	39171849	39172250
chr10	39206049	39206250
chr10	39241699	39242150
chr10	39272299	39272900
chr10	39275699	39275900
chr10	39276749	39277200
chr10	39277499	39278500
chr10	39343749	39344150
chr10	39344449	39345750
chr10	39366299	39366850
chr10	39379649	39379900
chr10	39392399	39392800
chr10	39996049	39997200
chr10	40136899	40137400
chr10	40150099	40150250
chr10	40150349	40150450
chr10	40165799	40166400
chr10	40201449	40201800
chr10	40218099	40218800
chr10	40219199	40220500
chr10	40241849	40242650
chr10	40243449	40243750
chr10	40244249	40245350
chr10	40247399	40247750
chr10	40571499	40572000
chr10	41194099	41194450
chr10	41194549	41195250
chr10	41285199	41285350
chr10	41532399	41532900
chr10	41613049	41613400
chr10	41654499	41655100
chr10	41753399	41753750
chr10	41755249	41756300
chr10	41756749	41757400
chr10	41809649	41810100
chr10	41810249	41810750
chr10	41811349	41811650
chr10	41812199	41812600
chr10	41842049	41842400
chr10	41950199	41950350
chr10	41951099	41951350
chr10	42059249	42060200
chr10	42066049	42067300
chr10	42136799	42137600
chr10	42241549	42242600
chr10	42242999	42243200
chr10	42243799	42244150
chr10	42442949	42443900
chr10	42483949	42484300
chr10	42500999	42501150
chr10	42612949	42613600
chr10	42617499	42617650
chr10	42704799	42705350
chr10	42891749	42892200
chr10	42892999	42893150
chr10	42947749	42948200
chr10	42999449	43000050
chr10	43208549	43208950
chr10	43209449	43209700
chr10	43798999	43799750
chr10	43877099	43877700
chr10	43890849	43890950
chr10	43928249	43928700
chr10	43928849	43930050
chr10	44044949	44045300
chr10	45118099	45118450
chr10	50649649	50650250
chr10	51962499	51963000
chr10	52141149	52142150
chr10	52142999	52143450
chr10	52429399	52429750
chr10	52430849	52431350
chr10	52433149	52433400
chr10	52434449	52434600
chr10	52435099	52435550
chr10	52438699	52440000
chr10	52440549	52441050
chr10	52441599	52441950
chr10	52497149	52497750
chr10	52499549	52500500
chr10	52506599	52507600
chr10	52508149	52508250
chr10	52511149	52512550
chr10	52519799	52520650
chr10	52540249	52540650
chr10	52541299	52541650
chr10	52550549	52551300
chr10	52558499	52559900
chr10	52560199	52560300
chr10	52566199	52566350
chr10	52578099	52578400
chr10	52578499	52578900
chr10	52579249	52580600
chr10	52594449	52594850
chr10	52595299	52595700
chr10	52598499	52598750
chr10	52601149	52601800
chr10	52603399	52603800
chr10	52630899	52631600
chr10	52645099	52645850
chr10	52654499	52654900
chr10	52655449	52655950
chr10	52656749	52658200
chr10	52712249	52713050
chr10	52747999	52749000
chr10	52809699	52810100
chr10	53134099	53134900
chr10	53135149	53135350
chr10	53164649	53165200
chr10	53185399	53186850
chr10	53224999	53225950
chr10	53226599	53227150
chr10	53239399	53239800
chr10	53240449	53241100
chr10	56362999	56363450
chr10	57721799	57722100
chr10	57722599	57723050
chr10	57744749	57745500
chr10	57783449	57784050
chr10	57793799	57794050
chr10	57795099	57795250
chr10	57795349	57796000
chr10	57796099	57796550
chr10	57799399	57799700
chr10	57801099	57801600
chr10	57802899	57803800
chr10	57805449	57805950
chr10	57817999	57818300
chr10	57832199	57832800
chr10	57834249	57835550
chr10	57845249	57846350
chr10	58633199	58633450
chr10	58702499	58702650
chr10	58703749	58704200
chr10	58748649	58749250
chr10	58773499	58773800
chr10	58893549	58894250
chr10	58902649	58902950
chr10	58924799	58925550
chr10	58931799	58932000
chr10	58984349	58984900
chr10	59026549	59027250
chr10	59028799	59029150
chr10	59039249	59039950
chr10	59040399	59041550
chr10	59129399	59130350
chr10	59262699	59263250
chr10	59360799	59361600
chr10	59362249	59362700
chr10	59363249	59363850
chr10	59372049	59373100
chr10	59373549	59373650
chr10	59374349	59374650
chr10	59379799	59380550
chr10	59381649	59382100
chr10	59382249	59383000
chr10	59490149	59491450
chr10	59657899	59658200
chr10	59665549	59666150
chr10	59666799	59667250
chr10	59671799	59672250
chr10	59724299	59724700
chr10	59734799	59734950
chr10	59735149	59735850
chr10	59743099	59743350
chr10	59743649	59743800
chr10	59744249	59745250
chr10	59814499	59814850
chr10	60278449	60278850
chr10	60589199	60590400
chr10	60720849	60721000
chr10	60736949	60737650
chr10	60740449	60741050
chr10	60753299	60753600
chr10	60837749	60837900
chr10	60838649	60839050
chr10	60857099	60857900
chr10	60969249	60969600
chr10	60983899	60984150
chr10	60984499	60985000
chr10	61124699	61125350
chr10	61177799	61178850
chr10	61214599	61214900
chr10	61222649	61222900
chr10	61275749	61276350
chr10	61653149	61653600
chr10	61653799	61654550
chr10	61655349	61655850
chr10	61657199	61657650
chr10	61658299	61658400
chr10	61659499	61659850
chr10	61711499	61712850
chr10	61729849	61730850
chr10	61731349	61731600
chr10	61762749	61763650
chr10	61777599	61779000
chr10	61780249	61781450
chr10	61783149	61783900
chr10	61792999	61793200
chr10	61799449	61799850
chr10	61881449	61882000
chr10	61963899	61964900
chr10	61965199	61965500
chr10	62111849	62112050
chr10	62784499	62784800
chr10	66289299	66289550
chr10	66312499	66313250
chr10	66313549	66314650
chr10	66360149	66360450
chr10	66457899	66458250
chr10	66561699	66562150
chr10	66573949	66574400
chr10	66606299	66606800
chr10	66664149	66664600
chr10	66664949	66665200
chr10	66744899	66745100
chr10	66889849	66890400
chr10	67022549	67023200
chr10	67034599	67034900
chr10	67035999	67037000
chr10	67261599	67262150
chr10	67566149	67566550
chr10	67567249	67568700
chr10	67569049	67569500
chr10	67570399	67571650
chr10	67572549	67573550
chr10	67631499	67632000
chr10	67699199	67699650
chr10	67700299	67701150
chr10	67701449	67702100
chr10	67711549	67712500
chr10	67903199	67903800
chr10	67904349	67904850
chr10	67904999	67905550
chr10	67999599	68000200
chr10	68004199	68005350
chr10	68070149	68070650
chr10	68648449	68649200
chr10	69097049	69097550
chr10	69219999	69220150
chr10	69273299	69273900
chr10	69297449	69297800
chr10	69388049	69389500
chr10	70202649	70203200
chr10	74525999	74526150
chr10	74531049	74532100
chr10	74532199	74532300
chr10	74532599	74533300
chr10	74538449	74539050
chr10	74560149	74560400
chr10	74561149	74561450
chr10	74569849	74570800
chr10	74575099	74575200
chr10	74578549	74579600
chr10	74579849	74580850
chr10	74581249	74581800
chr10	74582449	74583100
chr10	74583799	74584150
chr10	74633249	74633550
chr10	74676299	74676750
chr10	74684149	74684750
chr10	74685349	74685550
chr10	74715149	74715350
chr10	74762499	74762950
chr10	74889449	74890150
chr10	74914099	74914400
chr10	75012549	75013700
chr10	75257849	75258050
chr10	75309349	75310700
chr10	75320399	75321350
chr10	75322099	75323500
chr10	75341999	75343050
chr10	75343699	75344650
chr10	75710699	75711600
chr10	75719799	75719900
chr10	75724499	75724850
chr10	75826099	75826600
chr10	75995499	75996050
chr10	76613899	76614300
chr10	76669349	76669700
chr10	76670549	76671950
chr10	76672499	76673550
chr10	76673999	76674400
chr10	76690299	76691150
chr10	76692299	76692900
chr10	76706349	76707000
chr10	76714549	76715000
chr10	77043949	77045300
chr10	77097249	77097900
chr10	77099349	77099650
chr10	77470099	77470900
chr10	77478299	77478550
chr10	77540599	77540900
chr10	77647149	77648500
chr10	77718599	77718700
chr10	77756549	77757350
chr10	77758249	77759200
chr10	77760199	77761250
chr10	77762199	77762900
chr10	77767749	77767950
chr10	77769849	77770450
chr10	77796299	77797350
chr10	77800949	77801300
chr10	77813099	77813300
chr10	77926699	77928050
chr10	77928899	77929100
chr10	77933399	77934300
chr10	77986149	77986900
chr10	77987849	77988450
chr10	78027399	78027850
chr10	78031449	78032150
chr10	78033149	78034100
chr10	79146999	79147350
chr10	79157849	79158250
chr10	79158749	79159300
chr10	79163749	79164250
chr10	79175249	79175350
chr10	79300699	79300900
chr10	79303399	79304750
chr10	79304999	79306300
chr10	79314849	79315200
chr10	79336099	79337150
chr10	79395499	79395900
chr10	79399349	79399800
chr10	79408549	79408950
chr10	79422399	79423600
chr10	79449499	79450200
chr10	79487049	79487150
chr10	79507749	79508400
chr10	79508799	79509950
chr10	79510999	79511600
chr10	79511749	79512300
chr10	79514649	79515000
chr10	79533849	79534300
chr10	79537549	79538500
chr10	79560749	79561300
chr10	79561699	79563150
chr10	79563349	79564350
chr10	79614999	79615200
chr10	79622149	79623150
chr10	79623549	79624500
chr10	79627199	79628300
chr10	79635249	79636300
chr10	79729349	79729750
chr10	79757249	79758000
chr10	79758249	79759600
chr10	80021299	80022750
chr10	80050299	80051350
chr10	80067349	80067450
chr10	80116449	80117550
chr10	80127049	80127950
chr10	80135899	80136300
chr10	80140749	80141100
chr10	80203149	80203300
chr10	80237599	80237850
chr10	80238299	80238900
chr10	80258049	80258250
chr10	80319849	80321050
chr10	80401299	80401600
chr10	80402599	80402750
chr10	80423599	80424700
chr10	80426299	80426550
chr10	80427999	80429050
chr10	80450849	80452250
chr10	80468249	80468500
chr10	80472249	80473050
chr10	80473699	80474150
chr10	80488099	80488800
chr10	80490099	80490400
chr10	80516249	80517400
chr10	80520199	80521350
chr10	80572249	80572700
chr10	80574049	80574450
chr10	80597049	80597550
chr10	80603699	80603900
chr10	80604999	80605200
chr10	80635749	80636400
chr10	80636599	80636700
chr10	80637149	80638350
chr10	80646899	80647800
chr10	80665149	80665350
chr10	80665899	80666000
chr10	80666149	80666350
chr10	80761249	80762650
chr10	80823049	80823850
chr10	80875199	80875650
chr10	80876199	80876650
chr10	80877449	80877750
chr10	80879649	80880000
chr10	80896699	80896800
chr10	81005449	81006100
chr10	81032399	81032500
chr10	81059049	81059200
chr10	82152249	82153000
chr10	82159799	82161200
chr10	82161299	82162750
chr10	82162899	82163000
chr10	82315449	82316850
chr10	82324849	82324950
chr10	82640849	82641350
chr10	83099299	83100550
chr10	83107749	83108300
chr10	83109549	83110050
chr10	83247849	83248650
chr10	83499249	83499550
chr10	83518199	83518800
chr10	83748449	83749350
chr10	83750949	83752400
chr10	83757149	83757450
chr10	83780599	83781050
chr10	83802249	83803350
chr10	83845949	83846350
chr10	83846999	83847100
chr10	83851049	83851800
chr10	83853099	83854450
chr10	83854949	83855300
chr10	83857999	83859300
chr10	83863899	83864050
chr10	83864899	83865150
chr10	83873849	83874450
chr10	83878349	83878450
chr10	83885199	83885600
chr10	84148399	84148500
chr10	84163949	84164150
chr10	84361549	84362000
chr10	84429549	84430800
chr10	85483849	85484050
chr10	85487049	85487250
chr10	85488349	85488650
chr10	85489899	85490850
chr10	85491799	85492800
chr10	85494899	85496000
chr10	85496249	85496800
chr10	85512599	85512800
chr10	85521949	85522450
chr10	85528749	85530100
chr10	85530249	85530400
chr10	85532149	85532750
chr10	85567049	85567200
chr10	85629749	85630050
chr10	85634699	85635850
chr10	85637049	85637200
chr10	85645899	85646400
chr10	85710899	85711200
chr10	85713049	85713450
chr10	85740299	85740400
chr10	85747399	85747700
chr10	85766399	85767150
chr10	85773249	85773500
chr10	85799949	85801100
chr10	85802449	85803050
chr10	85811199	85811600
chr10	86162399	86162950
chr10	86163949	86164300
chr10	86164699	86165150
chr10	86245199	86245550
chr10	86248799	86249750
chr10	86249999	86250450
[truncated: 19,190 more rows]

## Sheet: S7. Putative Enhancers
chr	start	end	summit	rank
chr1	10560710	10561950	10561438	1
chr1	10762121	10763306	10762743	2
chr1	10767683	10768763	10768240	3
chr1	10783821	10784919	10784337	4
chr1	13742334	13743292	13742745	5
chr1	14263297	14264742	14264238	6
chr1	14281008	14283286	14282799	7
chr1	23209284	23210376	23209804	8
chr1	33954871	33955718	33955231	9
chr1	36702577	36703953	36703194	10
chr1	38011569	38012327	38011872	11
chr1	38451658	38452527	38452059	12
chr1	38458234	38459533	38458912	13
chr1	38483319	38484489	38483991	14
chr1	38663706	38666278	38665207	15
chr1	39612652	39613669	39613089	16
chr1	39752661	39753255	39753074	17
chr1	39754772	39756021	39755521	18
chr1	39814845	39815800	39815335	19
chr1	39815878	39816808	39816179	20
chr1	43184275	43185385	43185191	21
chr1	43540078	43541194	43540254	22
chr1	44632514	44633400	44633025	23
chr1	44641330	44642764	44642058	24
chr1	44648192	44649636	44648853	25
chr1	44841975	44842979	44842475	26
chr1	45561237	45562214	45561516	27
chr1	51202340	51202987	51202655	28
chr1	51565799	51567192	51566229	29
chr1	51587756	51588942	51588407	30
chr1	51845965	51847101	51846553	31
chr1	51878498	51879399	51878989	32
chr1	52652072	52653039	52652628	33
chr1	57115866	57116800	57116228	34
chr1	57152719	57153738	57153239	35
chr1	58342342	58343355	58342722	36
chr1	59344400	59345097	59344901	37
chr1	59354987	59355945	59355427	38
chr1	59505838	59507092	59506509	39
chr1	60874352	60875774	60875141	40
chr1	60881140	60881931	60881519	41
chr1	60882227	60883259	60882826	42
chr1	60907432	60908836	60908333	43
chr1	62759089	62760242	62759808	44
chr1	62785201	62785985	62785494	45
chr1	62789653	62791381	62790270	46
chr1	63022925	63023717	63023411	47
chr1	63755096	63756121	63755588	48
chr1	63823408	63824219	63823694	49
chr1	64066982	64068040	64067508	50
chr1	64147739	64148650	64148197	51
chr1	70119586	70120822	70120208	52
chr1	71926760	71927651	71927251	53
chr1	71955981	71957040	71956568	54
chr1	71963595	71964310	71963853	55
chr1	72355941	72357423	72356574	56
chr1	72460900	72461853	72461438	57
chr1	72474858	72476412	72475192	58
chr1	78053977	78055337	78054668	59
chr1	78055877	78058389	78057643	60
chr1	78065423	78066894	78066026	61
chr1	78392184	78392935	78392582	62
chr1	78458966	78459969	78459378	63
chr1	79734567	79735930	79735401	64
chr1	81734452	81735937	81735142	65
chr1	81742027	81743099	81742719	66
chr1	81909497	81910882	81910239	67
chr1	81958553	81959585	81959083	68
chr1	81963462	81964922	81963714	69
chr1	82004684	82005912	82005329	70
chr1	82106222	82107525	82107016	71
chr1	82151869	82153313	82152799	72
chr1	82355414	82356345	82355881	73
chr1	82830991	82831855	82831507	74
chr1	82915604	82916632	82916112	75
chr1	84851041	84853034	84852595	76
chr1	84853831	84854999	84854402	77
chr1	88894115	88895394	88894855	78
chr1	88899360	88900798	88900055	79
chr1	90736338	90737367	90736959	80
chr1	91026500	91027635	91027146	81
chr1	92175464	92176270	92175822	82
chr1	92806215	92807014	92806624	83
chr1	92867052	92868495	92868074	84
chr1	92869418	92870448	92869969	85
chr1	92871088	92872248	92871719	86
chr1	92919877	92921343	92920762	87
chr1	93209562	93210302	93209952	88
chr1	93852612	93853931	93853477	89
chr1	93931844	93933372	93932586	90
chr1	93983240	93984129	93983643	91
chr1	94026781	94027633	94027187	92
chr1	94640977	94642080	94641537	93
chr1	94651294	94652469	94652082	94
chr1	94670782	94671657	94671152	95
chr1	94683664	94684317	94683954	96
chr1	95080551	95081286	95081007	97
chr1	95445444	95446434	95446133	98
chr1	95463451	95464308	95463719	99
chr1	108051553	108052560	108051989	100
chr1	108133409	108134208	108133739	101
chr1	108199677	108200554	108200147	102
chr1	108297114	108297930	108297629	103
chr1	108596900	108597916	108597284	104
chr1	118004123	118005902	118004616	105
chr1	121805697	121806814	121806485	106
chr1	122011826	122013163	122012492	107
chr1	122132706	122133650	122133260	108
chr1	122253836	122254714	122254197	109
chr1	123211255	123212288	123211674	110
chr1	127324559	127325639	127325114	111
chr1	127404248	127405135	127404575	112
chr1	129470017	129471022	129470618	113
chr1	133838759	133839889	133839317	114
chr1	134271589	134272741	134272166	115
chr1	134303973	134304928	134304651	116
chr1	135776892	135778012	135777453	117
chr1	136798504	136799408	136799017	118
chr1	136910861	136912498	136911947	119
chr1	136913085	136914210	136913687	120
chr1	137521840	137523201	137522537	121
chr1	137555706	137556790	137556236	122
chr1	137560111	137561246	137560657	123
chr1	137561710	137562616	137562223	124
chr1	137628338	137629105	137628842	125
chr1	137673267	137674303	137673840	126
chr1	137676961	137678394	137677903	127
chr1	137679262	137679744	137679582	128
chr1	137748583	137749711	137749135	129
chr1	138579306	138580442	138579838	130
chr1	141048594	141049585	141049136	131
chr1	152796231	152797914	152797405	132
chr1	153189451	153191311	153190124	133
chr1	153522623	153523546	153523123	134
chr1	153629842	153631410	153630838	135
chr1	153737016	153737963	153737444	136
chr1	154102176	154103338	154102801	137
chr1	154639559	154640721	154640146	138
chr1	155111913	155113004	155112422	139
chr1	155411486	155412525	155412053	140
chr1	155412627	155413523	155413064	141
chr1	155419005	155420734	155419962	142
chr1	155809151	155810152	155809601	143
chr1	155843975	155845001	155844479	144
chr1	163885441	163886089	163885900	145
chr1	165128058	165128732	165128326	146
chr1	165321143	165322140	165321619	147
chr1	167517657	167518624	167518068	148
chr1	167540275	167541516	167540894	149
chr1	167549147	167550183	167549849	150
chr1	171692586	171693330	171692847	151
chr1	171879407	171880794	171880339	152
chr1	172865339	172866421	172865965	153
chr1	178710335	178711422	178710807	154
chr1	178712969	178714293	178713727	155
chr1	179553072	179554131	179553601	156
chr1	180971743	180972522	180972316	157
chr1	181024345	181025535	181025092	158
chr1	181501363	181502159	181501624	159
chr1	182353243	182354197	182353720	160
chr1	185334329	185335452	185334905	161
chr1	185397397	185398480	185398004	162
chr1	185613961	185617135	185616373	163
chr1	185688572	185690030	185689140	164
chr1	185729105	185729690	185729491	165
chr1	185908186	185909176	185908655	166
chr1	189059934	189060831	189060388	167
chr1	191571194	191572683	191572218	168
chr1	193054000	193054995	193054595	169
chr1	193085326	193086355	193085784	170
chr1	193115987	193116928	193116411	171
chr1	196704357	196705172	196704833	172
chr10	6451552	6452612	6452045	173
chr10	6457094	6458634	6457760	174
chr10	8409795	8410799	8410300	175
chr10	9223169	9224600	9224068	176
chr10	9251695	9253467	9252531	177
chr10	10163882	10165488	10164861	178
chr10	10185573	10186795	10186119	179
chr10	10274717	10276086	10275670	180
chr10	12160215	12161024	12160538	181
chr10	12422858	12424015	12423559	182
chr10	12818787	12819999	12819574	183
chr10	12825772	12828883	12826398	184
chr10	14052345	14053299	14052588	185
chr10	16731667	16733069	16732539	186
chr10	17801278	17801993	17801455	187
chr10	19944118	19945098	19944669	188
chr10	20690554	20691749	20691256	189
chr10	21314124	21315134	21314549	190
chr10	23277443	23278167	23277793	191
chr10	24939698	24940612	24940097	192
chr10	24980688	24981700	24981223	193
chr10	26264435	26265347	26264810	194
chr10	27310760	27311915	27311361	195
chr10	27354060	27355308	27354547	196
chr10	27393910	27394856	27394437	197
chr10	28371566	28372624	28372170	198
chr10	30509959	30511460	30511020	199
chr10	31311623	31312517	31312110	200
chr10	33768280	33769296	33768588	201
chr10	37346296	37347296	37346912	202
chr10	38077032	38078634	38077895	203
chr10	38568430	38569901	38569383	204
chr10	38759353	38760648	38760185	205
chr10	38764045	38765259	38764600	206
chr10	39343756	39344825	39344629	207
chr10	39345071	39345969	39345552	208
chr10	39392154	39392893	39392543	209
chr10	40219459	40220362	40219866	210
chr10	40243326	40245198	40244555	211
chr10	41812217	41812862	41812411	212
chr10	42704578	42705564	42704854	213
chr10	51962366	51963429	51962873	214
chr10	52499309	52500793	52500240	215
chr10	52510866	52512018	52511691	216
chr10	52550241	52551753	52550807	217
chr10	52644826	52645916	52645388	218
chr10	52654292	52656008	52655562	219
chr10	53225097	53225986	53225558	220
chr10	56362718	56363754	56363333	221
chr10	57744956	57745532	57745168	222
chr10	58924105	58925719	58924391	223
chr10	59028701	59029400	59028939	224
chr10	60740572	60741524	60740999	225
chr10	61656708	61657923	61657366	226
chr10	61782469	61783477	61783009	227
chr10	61881071	61882244	61881737	228
chr10	66312189	66313171	66312659	229
chr10	66889613	66890558	66890179	230
chr10	67261410	67262308	67261865	231
chr10	67572415	67573400	67572990	232
chr10	67999271	68000480	67999794	233
chr10	74762443	74763242	74762711	234
chr10	74889276	74889923	74889688	235
chr10	76692180	76693221	76692659	236
chr10	76706163	76707194	76706633	237
chr10	76714371	76715854	76714906	238
chr10	79533565	79534491	79533934	239
chr10	79623898	79624826	79624392	240
chr10	80319598	80320698	80320417	241
chr10	80425819	80426965	80426226	242
chr10	80473204	80474201	80473797	243
chr10	83099810	83100779	83100293	244
chr10	83748175	83749695	83749094	245
chr10	83780203	83781280	83780859	246
chr10	83802105	83803449	83802373	247
chr10	83845700	83847491	83846123	248
chr10	83850966	83851850	83851445	249
chr10	83873316	83874539	83874035	250
chr10	85494018	85496219	85495480	251
chr10	85710555	85711547	85710989	252
chr10	88897218	88898414	88897700	253
chr10	88920377	88921971	88921566	254
chr10	88970884	88972058	88971469	255
chr10	88993342	88994318	88993855	256
chr10	89957491	89958161	89957919	257
chr10	90684780	90686118	90685759	258
chr10	90922090	90923307	90922704	259
chr10	92538448	92539121	92538897	260
chr10	92894928	92895975	92895414	261
chr10	93061679	93062731	93062206	262
chr10	93124187	93125246	93124904	263
chr10	93407604	93408965	93407856	264
chr10	94096149	94097189	94096580	265
chr10	94386578	94387439	94386928	266
chr10	95477602	95479078	95478525	267
chr10	95860145	95861809	95860633	268
chr10	96090822	96091764	96091165	269
chr10	98664311	98664912	98664596	270
chr10	98746333	98747456	98746872	271
chr10	102405411	102406634	102406085	272
chr10	107464847	107466065	107465582	273
chr10	110199130	110200269	110199748	274
chr10	110953465	110954444	110953942	275
chr10	110980390	110982224	110980943	276
chr10	111107420	111108624	111108085	277
chr10	112390399	112391502	112391265	278
chr10	114955394	114956561	114956049	279
chr10	115831214	115832312	115831828	280
chr10	116432175	116433601	116433015	281
chr10	117548697	117549377	117549199	282
chr10	117903236	117904298	117903778	283
chr10	119853980	119855157	119854405	284
chr10	119858697	119859830	119859339	285
chr10	120053313	120054714	120053894	286
chr10	120060893	120062188	120061520	287
chr10	120068729	120069844	120069305	288
chr10	120085519	120086589	120086060	289
chr10	120943245	120944429	120943847	290
chr10	121295641	121296662	121296250	291
chr10	121340636	121341966	121341358	292
chr10	121455176	121456311	121455683	293
chr10	122284686	122285904	122285200	294
chr10	122298755	122300024	122299452	295
chr10	122319370	122320558	122319901	296
chr10	128136263	128137405	128136953	297
chr11	3229648	3230251	3230062	298
chr11	4081722	4082892	4082362	299
chr11	4198781	4199980	4199363	300
chr11	4207939	4209213	4208791	301
chr11	5695314	5696374	5695879	302
chr11	6673036	6673752	6673555	303
chr11	7323423	7324278	7323818	304
chr11	8357498	8358628	8358073	305
chr11	8591485	8593588	8591999	306
chr11	9866770	9868253	9867725	307
chr11	21061592	21062607	21062400	308
chr11	21271865	21273344	21272273	309
chr11	21321862	21322839	21322572	310
chr11	22319678	22321348	22320269	311
chr11	22337209	22338258	22337718	312
chr11	22728024	22729136	22728608	313
chr11	29522268	29523249	29522709	314
chr11	30109020	30110213	30109588	315
chr11	31729387	31731302	31730662	316
chr11	31737996	31738971	31738450	317
chr11	32417489	32418404	32417876	318
chr11	32452432	32453125	32452859	319
chr11	32464806	32466437	32465269	320
chr11	32480642	32481258	32480953	321
chr11	36089105	36089864	36089589	322
chr11	42843286	42843953	42843507	323
chr11	42960386	42961587	42961109	324
chr11	43742906	43743896	43743473	325
chr11	46024754	46025633	46025200	326
chr11	47033398	47034578	47033936	327
chr11	49747233	49748394	49747808	328
chr11	50026077	50027161	50026756	329
chr11	52468900	52470272	52469834	330
chr11	52732334	52733870	52733400	331
chr11	52737304	52738501	52737970	332
chr11	52752514	52754514	52753020	333
chr11	52777651	52778795	52778294	334
chr11	54541642	54543245	54542062	335
chr11	54698430	54698995	54698621	336
chr11	54749248	54750752	54750174	337
chr11	55219020	55220509	55219607	338
chr11	59272100	59273078	59272636	339
chr11	60086507	60087428	60086952	340
chr11	60107454	60108647	60107936	341
chr11	60111011	60112230	60111809	342
chr11	60124826	60125957	60125403	343
chr11	61863721	61864781	61864297	344
chr11	61866846	61867950	61867465	345
chr11	61919806	61920832	61920292	346
chr11	62372375	62373041	62372771	347
chr11	62449945	62450912	62450445	348
chr11	62482512	62483743	62483012	349
chr11	62853085	62854117	62853679	350
chr11	62928098	62929921	62928719	351
chr11	62948502	62949673	62949195	352
chr11	67399426	67400400	67399955	353
chr11	69292932	69293872	69293340	354
chr11	69927738	69928743	69928298	355
chr11	70011226	70012688	70011809	356
chr11	70635295	70636272	70635966	357
chr11	70642152	70643450	70642808	358
chr11	70703829	70705504	70704374	359
chr11	70744690	70745788	70745231	360
chr11	71571738	71572693	71572189	361
chr11	71790026	71790795	71790383	362
chr11	72097807	72098736	72098409	363
chr11	72181225	72182403	72181974	364
chr11	72689633	72690496	72690056	365
chr11	72882957	72883611	72883330	366
chr11	73097368	73098738	73098176	367
chr11	75914633	75915427	75915014	368
chr11	75962288	75963127	75962688	369
chr11	76400395	76401614	76401084	370
chr11	77072792	77073628	77073091	371
chr11	77596458	77598123	77597176	372
chr11	78595756	78597458	78596742	373
chr11	79009285	79010487	79009786	374
chr11	79013611	79014660	79014076	375
chr11	79119728	79121045	79120264	376
chr11	79571231	79572097	79571584	377
chr11	84891897	84892682	84892224	378
chr11	85491369	85493003	85492218	379
chr11	85509851	85510698	85510504	380
chr11	85526781	85527736	85527191	381
chr11	85730452	85731255	85730743	382
chr11	86782075	86783537	86783051	383
chr11	86838504	86839802	86839100	384
chr11	89685350	89686378	89685690	385
chr11	90325207	90325788	90325406	386
chr11	95493381	95494249	95493921	387
chr11	95505589	95506378	95505843	388
chr11	95975028	95975958	95975480	389
chr11	97263867	97265351	97264229	390
chr11	97283415	97284547	97284198	391
chr11	97666017	97667053	97666459	392
chr11	97690989	97692428	97691317	393
chr11	100864122	100865064	100864532	394
chr11	100885697	100886909	100886530	395
chr11	100895640	100897075	100896824	396
chr11	100975847	100977672	100977018	397
chr11	103003474	103004418	103004002	398
chr11	103261008	103261936	103261554	399
chr11	104133306	104134269	104133761	400
chr11	104460725	104461470	104461194	401
chr11	104472458	104473675	104473094	402
chr11	106432880	106434570	106433545	403
chr11	107881634	107883085	107882302	404
chr11	108011556	108012396	108012052	405
chr11	112869692	112870427	112870043	406
chr11	113006822	113007745	113007332	407
chr11	113045009	113046172	113045679	408
chr11	113049162	113050438	113049837	409
chr11	113082405	113083562	113083018	410
chr11	113137848	113139269	113138449	411
chr11	113153099	113154579	113153836	412
chr11	114587843	114588642	114588370	413
chr11	115083533	115084502	115084020	414
chr11	115817725	115818535	115818080	415
chr11	116383735	116385381	116384442	416
chr11	116677757	116678437	116677917	417
chr11	116959610	116960618	116960022	418
chr11	117068873	117070000	117069636	419
chr11	118058978	118059931	118059374	420
chr11	118188442	118189462	118189067	421
chr11	118198793	118199433	118198971	422
chr11	118224132	118225030	118224432	423
chr11	119570320	119571079	119570597	424
chr11	119790885	119791907	119791506	425
chr11	119969001	119969747	119969270	426
chr11	120084668	120086054	120085323	427
chr12	4671719	4672768	4672271	428
chr12	7201809	7202826	7202127	429
chr12	7219396	7220759	7219904	430
chr12	8095996	8097421	8096928	431
chr12	8097798	8098777	8098216	432
chr12	8174935	8176050	8175475	433
chr12	8392860	8394094	8393427	434
chr12	8976370	8977329	8976950	435
chr12	9862709	9863534	9863113	436
chr12	9864412	9865324	9864887	437
chr12	11324183	11325004	11324638	438
chr12	11331077	11332122	11331578	439
chr12	13000652	13001669	13001312	440
chr12	13083248	13084964	13084024	441
chr12	16796321	16797250	16796760	442
chr12	16842638	16843859	16843164	443
chr12	16857244	16858270	16857763	444
chr12	16879714	16880355	16879969	445
chr12	17227097	17228020	17227585	446
chr12	21431536	21432784	21432374	447
chr12	25578668	25579677	25579219	448
chr12	25718248	25719881	25719122	449
chr12	27522857	27523791	27523370	450
chr12	27978678	27979948	27979290	451
chr12	31955869	31956932	31956461	452
chr12	31994930	31996329	31995797	453
chr12	33703107	33704732	33703676	454
chr12	33919994	33921221	33920495	455
chr12	35758232	35759278	35758650	456
chr12	35886504	35887512	35887061	457
chr12	35890691	35891251	35891070	458
chr12	35894643	35895657	35895137	459
chr12	35930518	35931532	35930868	460
chr12	35943933	35945199	35944489	461
chr12	35950080	35951251	35950740	462
chr12	35976069	35977627	35976872	463
chr12	37036040	37037143	37036734	464
chr12	37070264	37071472	37070952	465
chr12	37233434	37234316	37233917	466
chr12	40665273	40666141	40665779	467
chr12	45455321	45456968	45456329	468
chr12	45491153	45492143	45491586	469
chr12	45563298	45564720	45564021	470
chr12	45646488	45647973	45647414	471
chr12	52948672	52949666	52949153	472
chr12	53936061	53937025	53936558	473
chr12	54162091	54163187	54162672	474
chr12	55084617	55085585	55085058	475
chr12	67258025	67259198	67258832	476
chr12	70488994	70489859	70489666	477
chr12	70489999	70491384	70490723	478
chr12	70551702	70552800	70552262	479
chr12	70663966	70664549	70664289	480
chr12	70994831	70995914	70995479	481
chr12	71151289	71152317	71151860	482
chr12	71951913	71953054	71952362	483
chr12	72474483	72475457	72474879	484
chr12	72563437	72564514	72563963	485
chr12	72635955	72637380	72637124	486
chr12	72998925	73001249	73000781	487
chr12	74478693	74479734	74479203	488
chr12	76497523	76498478	76497913	489
chr12	76525089	76526075	76525635	490
chr12	77559768	77560573	77560160	491
chr12	77587527	77588383	77588080	492
chr12	79057690	79058634	79058176	493
chr12	80336234	80337215	80336808	494
chr12	80452767	80454129	80453175	495
chr12	80608105	80609007	80608488	496
chr12	80938804	80939718	80939340	497
chr12	80979987	80981954	80980346	498
chr12	81076709	81077582	81077212	499
chr12	81235998	81236913	81236400	500
chr12	81480432	81481458	81480902	501
chr12	81954493	81955130	81954904	502
chr12	83528182	83528792	83528619	503
chr12	86691206	86692331	86691574	504
chr12	86706783	86708094	86707263	505
chr12	86954714	86955501	86955091	506
chr12	88164863	88168826	88165948	507
chr12	88722018	88722829	88722492	508
chr12	88738756	88739575	88739151	509
chr12	89700981	89702062	89701555	510
chr12	91403752	91404477	91404164	511
chr12	99307028	99308023	99307483	512
chr12	101441982	101442804	101442325	513
chr12	102977830	102978853	102978340	514
chr12	103031152	103033448	103031736	515
chr12	103045317	103046487	103045921	516
chr12	103068745	103069629	103069142	517
chr12	103299051	103300428	103299730	518
chr12	103854622	103855715	103855148	519
chr12	104002258	104003812	104003355	520
chr12	104070571	104071575	104070969	521
chr12	105653520	105654523	105654060	522
chr12	106096619	106097619	106097057	523
chr12	106264109	106265135	106264624	524
chr12	109451417	109452346	109451810	525
chr12	109482705	109483764	109483368	526
chr12	112668134	112669635	112668680	527
chr12	113033070	113033942	113033585	528
chr12	113189574	113190563	113190078	529
chr12	113754953	113755982	113755345	530
chr12	113789455	113790838	113790195	531
chr12	114261174	114261977	114261484	532
chr12	117419553	117420396	117420033	533
chr12	119127743	119129048	119128341	534
chr12	120408179	120409041	120408586	535
chr13	3806161	3807685	3807217	536
chr13	5603151	5604124	5603730	537
chr13	9303401	9304651	9304212	538
chr13	9353092	9353729	9353289	539
chr13	12403344	12404541	12403908	540
chr13	13260616	13261579	13261072	541
chr13	13494267	13495202	13494693	542
chr13	13630426	13631501	13630957	543
chr13	15512677	15514266	15513758	544
chr13	15533365	15534611	15533959	545
chr13	15535899	15536948	15536408	546
chr13	15642334	15643027	15642716	547
chr13	19682626	19683747	19683155	548
chr13	20920459	20921790	20921171	549
chr13	23801159	23802815	23801780	550
chr13	24108824	24110091	24109809	551
chr13	24110124	24111218	24110652	552
chr13	24657093	24658499	24657955	553
chr13	25174846	25175871	25175360	554
chr13	25830181	25831112	25830657	555
chr13	26751000	26752360	26751628	556
chr13	28549027	28550548	28549410	557
chr13	28644286	28645445	28645038	558
chr13	28782159	28783539	28782633	559
chr13	28936175	28937254	28936672	560
chr13	29641341	29643894	29642948	561
chr13	29664151	29665220	29664759	562
chr13	29852044	29852975	29852519	563
chr13	30844369	30845649	30844918	564
chr13	30873730	30875078	30874226	565
chr13	32796690	32797971	32797249	566
chr13	33143477	33144505	33144072	567
chr13	34204041	34204567	34204372	568
chr13	34204658	34205781	34205269	569
chr13	34325919	34326819	34326485	570
chr13	34658325	34659718	34658880	571
chr13	34898229	34899226	34898634	572
chr13	34906019	34907058	34906675	573
chr13	35107434	35108535	35108247	574
chr13	35593038	35594059	35593553	575
chr13	41434535	41435139	41434869	576
chr13	43100321	43101336	43100614	577
chr13	43384263	43385144	43384573	578
chr13	43444555	43445286	43444916	579
chr13	44180895	44181728	44181208	580
chr13	44516625	44518600	44517476	581
chr13	45513846	45515088	45514579	582
chr13	45524279	45525075	45524802	583
chr13	45550147	45551128	45550566	584
chr13	45564146	45566081	45565262	585
chr13	45779984	45781155	45780605	586
chr13	45873253	45874234	45873704	587
chr13	45888670	45889798	45889149	588
chr13	45905118	45906123	45905659	589
chr13	45945250	45946533	45946079	590
chr13	46203345	46204321	46203858	591
chr13	46422415	46423150	46422771	592
chr13	46935406	46936558	46936162	593
chr13	48661404	48662201	48661843	594
chr13	51499002	51500223	51500042	595
chr13	52873174	52874326	52873688	596
chr13	53037606	53038959	53038059	597
chr13	54725975	54727360	54726471	598
chr13	54738733	54739637	54739251	599
chr13	54822137	54822913	54822557	600
chr13	57132280	57133187	57132797	601
chr13	60151910	60152947	60152385	602
chr13	60200963	60201551	60201402	603
chr13	63255962	63257251	63256794	604
chr13	63395008	63396377	63395700	605
chr13	63418919	63419936	63419385	606
chr13	63424350	63425324	63424816	607
chr13	63425791	63427157	63426192	608
chr13	63792773	63793965	63793389	609
chr13	67673353	67674177	67673773	610
chr13	73115231	73116143	73115661	611
chr13	73584058	73585361	73584840	612
chr13	74004726	74005590	74005082	613
chr13	74018317	74020200	74019640	614
chr13	74029965	74030926	74030380	615
chr13	81360532	81362083	81361510	616
chr13	84162776	84164097	84163551	617
chr13	84588211	84589582	84589108	618
chr13	89967388	89968703	89968280	619
chr13	90419213	90420426	90419741	620
chr13	90534137	90535445	90534738	621
chr13	93434479	93435715	93435292	622
chr13	93636470	93637247	93636829	623
chr13	94258271	94259229	94258734	624
chr13	94888394	94889704	94888949	625
chr13	94902128	94903113	94902660	626
chr13	94924212	94925325	94924900	627
chr13	95068107	95069234	95068567	628
chr13	98019136	98020238	98019649	629
chr13	99325946	99326870	99326374	630
chr13	99961500	99962375	99961949	631
chr13	102547337	102548367	102547876	632
chr13	104329453	104330453	104329958	633
chr13	108283976	108285033	108284373	634
chr13	108431718	108432903	108432297	635
chr13	109055242	109056087	109055706	636
chr13	109086695	109087709	109087088	637
chr13	109388526	109390336	109389064	638
chr13	109609761	109610519	109610270	639
chr13	109650583	109651669	109651218	640
chr13	110326445	110327629	110327156	641
chr13	110484068	110485192	110484609	642
chr13	110611962	110615624	110612836	643
chr13	111642122	111644092	111642304	644
chr13	112081957	112083024	112082472	645
chr13	112718952	112719615	112719419	646
chr13	114908157	114909286	114908519	647
chr13	115277978	115278899	115278461	648
chr13	115628525	115629636	115629139	649
chr13	118346914	118347973	118347269	650
chr13	118360071	118361567	118360959	651
chr14	8658571	8659796	8659317	652
chr14	11987176	11988149	11987628	653
chr14	15431526	15433230	15432319	654
chr14	15441587	15442578	15442013	655
chr14	15907972	15908876	15908550	656
chr14	17265299	17266477	17265958	657
chr14	17316048	17317009	17316475	658
chr14	17654722	17655419	17655173	659
chr14	18700581	18701328	18700936	660
chr14	18750119	18751300	18750777	661
chr14	20962697	20963868	20963393	662
chr14	20973983	20974952	20974453	663
chr14	21052335	21053669	21052956	664
chr14	21248627	21249801	21249459	665
chr14	21624133	21625085	21624759	666
chr14	22641540	22642725	22642188	667
chr14	24730073	24730910	24730582	668
chr14	26190788	26191778	26191218	669
chr14	26545051	26545891	26545407	670
chr14	26554002	26555344	26554519	671
chr14	26672360	26674105	26672991	672
chr14	32216203	32217873	32216633	673
chr14	32472788	32474425	32473692	674
chr14	32474759	32476138	32475776	675
chr14	32477050	32478583	32477455	676
chr14	32478617	32479403	32478870	677
chr14	32482112	32483696	32482607	678
chr14	32494250	32495235	32494664	679
chr14	33114438	33115389	33115007	680
chr14	33336485	33337786	33337386	681
chr14	37782865	37785052	37784005	682
chr14	37785758	37786516	37786136	683
chr14	41769557	41770524	41769914	684
chr14	45940892	45942089	45941526	685
chr14	45944841	45946208	45945321	686
chr14	46097237	46099347	46097662	687
chr14	46141419	46142093	46141817	688
chr14	46326523	46328368	46327137	689
chr14	47961150	47962422	47961995	690
chr14	47970094	47971300	47970877	691
chr14	47981056	47982281	47981627	692
chr14	47990147	47992135	47991608	693
chr14	55062217	55063246	55062737	694
chr14	55359898	55361928	55361336	695
chr14	55367202	55368287	55367836	696
chr14	56581911	56582394	56582199	697
chr14	57703704	57704936	57704397	698
chr14	57934003	57936612	57935663	699
chr14	57966006	57967684	57967101	700
chr14	58379094	58380005	58379413	701
chr14	60169073	60170328	60169822	702
chr14	61467530	61468525	61468032	703
chr14	62811300	62812587	62811820	704
chr14	63486601	63487598	63487172	705
chr14	63750649	63751660	63751211	706
chr14	63964782	63965603	63965113	707
chr14	65607289	65608493	65607947	708
chr14	65736571	65737683	65737250	709
chr14	65773050	65774125	65773524	710
chr14	66239481	66240138	66239977	711
chr14	66240738	66241885	66241179	712
chr14	66997038	66998079	66997468	713
chr14	68387679	68388750	68388194	714
chr14	68410696	68412104	68411314	715
chr14	68528007	68528735	68528234	716
chr14	68535235	68536453	68535661	717
chr14	69209163	69209945	69209554	718
chr14	69887410	69888413	69887841	719
chr14	70456547	70457341	70456864	720
chr14	70501404	70502942	70502102	721
chr14	70735976	70737149	70736652	722
chr14	71446387	71447741	71447154	723
chr14	71528158	71528890	71528448	724
chr14	73841307	73842347	73841818	725
chr14	75245699	75246668	75246170	726
chr14	75249928	75250766	75250521	727
chr14	75274565	75275771	75275235	728
chr14	75302433	75303284	75302778	729
chr14	76263072	76264287	76263730	730
chr14	77087477	77088419	77088129	731
chr14	77354607	77355585	77355124	732
chr14	78036545	78037339	78037003	733
chr14	78858443	78860136	78859615	734
chr14	79602633	79603878	79603441	735
chr14	102183433	102184566	102183956	736
chr14	104177232	104178151	104177623	737
chr14	104290393	104291402	104290953	738
chr14	105987365	105988661	105987788	739
chr14	106068011	106068868	106068506	740
chr14	119164182	119165337	119164706	741
chr14	119273682	119275070	119274567	742
chr14	119610984	119612049	119611404	743
chr14	120349919	120350772	120350422	744
chr14	120754225	120755254	120754871	745
chr14	120782166	120783173	120782708	746
chr14	120906154	120907599	120906952	747
chr14	121120835	121122378	121121403	748
chr14	121161156	121162060	121161565	749
chr14	121451892	121452965	121452415	750
chr14	121567395	121568509	121567809	751
chr14	121604543	121605529	121604902	752
chr14	122013363	122014343	122013816	753
chr14	123930003	123931235	123930688	754
chr15	3855330	3856165	3855770	755
chr15	4041677	4042731	4042091	756
chr15	6666005	6667086	6666622	757
chr15	7827689	7828764	7828325	758
chr15	7939834	7940808	7940324	759
chr15	9018607	9019185	9018785	760
chr15	10745558	10746655	10746266	761
chr15	10747857	10748844	10748023	762
chr15	10772344	10773290	10772861	763
chr15	10798187	10799556	10799023	764
chr15	10819600	10820586	10820086	765
chr15	11356212	11357064	11356648	766
chr15	11380647	11381720	11381031	767
chr15	11384858	11386545	11385950	768
chr15	11419986	11421569	11420529	769
chr15	11519354	11520429	11519991	770
chr15	11731690	11732738	11732177	771
chr15	11765464	11766475	11765924	772
chr15	11774646	11775921	11775383	773
chr15	12040697	12041966	12041301	774
chr15	12177404	12178147	12177805	775
chr15	12270339	12271653	12270716	776
chr15	25356130	25356772	25356323	777
chr15	25506826	25508236	25507399	778
chr15	25603675	25604684	25604138	779
chr15	25619278	25620612	25619846	780
chr15	25807036	25808680	25808018	781
chr15	25828468	25829665	25828986	782
chr15	25844472	25845730	25845034	783
chr15	26766751	26767926	26767224	784
chr15	27711422	27713035	27712561	785
chr15	27737628	27738743	27738197	786
chr15	27853394	27854279	27853704	787
chr15	31543506	31544223	31543738	788
chr15	34301546	34302064	34301846	789
chr15	34338731	34339914	34339189	790
chr15	34406769	34407719	34407387	791
chr15	34833553	34834888	34834020	792
chr15	36226401	36227227	36226887	793
chr15	36292118	36293566	36293100	794
chr15	36370824	36371931	36371215	795
chr15	37361098	37361763	37361337	796
chr15	37361949	37363663	37362387	797
chr15	37391408	37392578	37391898	798
chr15	38026003	38026866	38026474	799
chr15	38105845	38106726	38106328	800
chr15	38879106	38879790	38879401	801
chr15	38884762	38885963	38885288	802
chr15	41524469	41525892	41525414	803
chr15	42786589	42787628	42786921	804
chr15	42796873	42797808	42797285	805
chr15	42885891	42886965	42886558	806
chr15	52454710	52455781	52455223	807
chr15	53090411	53091412	53090905	808
chr15	54122428	54123505	54122809	809
chr15	54125774	54126739	54126266	810
chr15	54778504	54780068	54779351	811
chr15	55101073	55102346	55101652	812
chr15	55268309	55269457	55268886	813
chr15	55271739	55272394	55272197	814
chr15	55310537	55312700	55311216	815
chr15	55631659	55632855	55632373	816
chr15	55873735	55874666	55874115	817
chr15	56251111	56252849	56252438	818
chr15	56267184	56268559	56267931	819
chr15	56304933	56305869	56305430	820
chr15	56310825	56311906	56311260	821
chr15	57738023	57738764	57738357	822
chr15	57797336	57798279	57797672	823
chr15	57969849	57970565	57970332	824
chr15	58198864	58200041	58199407	825
chr15	59029159	59030203	59029803	826
chr15	59223127	59224326	59223650	827
chr15	59242714	59244243	59243711	828
chr15	59591100	59591995	59591532	829
chr15	59635324	59636446	59635878	830
chr15	59657854	59659045	59658394	831
chr15	61910577	61911591	61911209	832
chr15	61936028	61936703	61936285	833
chr15	61950429	61951159	61950687	834
chr15	61952335	61953165	61952606	835
chr15	62155551	62156680	62156046	836
chr15	63231623	63232767	63232134	837
chr15	63447436	63449557	63448202	838
chr15	63489144	63490352	63490032	839
chr15	63502350	63503805	63502840	840
chr15	63506582	63507839	63507064	841
chr15	63558155	63560764	63558545	842
chr15	63986827	63987881	63987490	843
chr15	64054656	64055540	64055135	844
chr15	64088689	64090412	64089892	845
chr15	64126238	64127597	64126755	846
chr15	64527093	64527661	64527480	847
chr15	66546218	66547815	66547334	848
chr15	66675300	66676238	66675798	849
chr15	66707148	66708199	66707700	850
chr15	66792654	66794426	66793249	851
chr15	66850432	66851461	66850959	852
chr15	67189256	67190030	67189619	853
chr15	67194935	67196728	67196184	854
chr15	67843427	67844123	67843665	855
chr15	67933150	67933922	67933508	856
chr15	68232385	68233762	68233360	857
chr15	72113546	72115251	72114544	858
chr15	72992389	72993039	72992763	859
chr15	73295433	73296706	73296175	860
chr15	75650893	75651773	75651309	861
chr15	75970255	75970961	75970558	862
chr15	76291837	76292592	76292206	863
chr15	76295453	76296183	76295783	864
chr15	77718286	77719326	77718853	865
chr15	78279902	78280957	78280179	866
chr15	79006308	79007070	79006576	867
chr15	79023107	79024057	79023562	868
chr15	79031661	79032811	79032442	869
chr15	79037849	79040347	79039701	870
chr15	79053253	79054798	79054359	871
chr15	79935788	79936931	79936361	872
chr15	80514074	80515080	80514571	873
chr15	82984319	82985128	82984659	874
chr15	83053793	83054327	83053990	875
chr15	83255941	83256831	83256398	876
chr15	84803502	84804642	84804039	877
chr15	84805833	84806794	84806357	878
chr15	85998353	85999750	85999147	879
chr15	93359893	93361716	93360766	880
chr15	94222411	94223713	94223308	881
chr15	94260822	94261934	94261253	882
chr15	95634373	95635267	95634989	883
chr15	95635319	95636010	95635515	884
chr15	95653850	95654819	95654461	885
chr15	95658933	95660064	95659385	886
chr15	95782287	95783218	95782761	887
chr15	97580891	97581582	97581286	888
chr15	98351228	98352201	98351671	889
chr15	99250405	99251863	99251356	890
chr15	99415688	99416871	99416363	891
chr15	99680278	99681461	99680948	892
chr15	99719609	99720783	99720122	893
chr15	99975569	99976593	99976053	894
chr15	99997627	99998988	99998425	895
chr15	100359171	100360151	100359623	896
chr15	101107547	101108648	101108094	897
chr15	101166845	101167873	101167409	898
chr15	103326332	103327207	103326776	899
chr16	4912459	4913532	4912976	900
chr16	4944077	4945324	4944779	901
chr16	8530125	8531498	8530971	902
chr16	10975742	10976962	10976659	903
chr16	11007968	11009246	11008995	904
chr16	11012320	11013607	11012931	905
chr16	11164493	11165503	11164978	906
chr16	11656959	11658132	11657621	907
chr16	13548610	13549923	13549490	908
chr16	15984045	15985097	15984660	909
chr16	15991481	15992775	15992388	910
chr16	18096333	18097079	18096551	911
chr16	18182633	18183285	18182924	912
chr16	18470856	18472727	18471720	913
chr16	18788776	18789493	18789085	914
chr16	21398271	21399065	21398692	915
chr16	22067274	22068209	22067571	916
chr16	22733868	22734744	22734271	917
chr16	22839020	22840242	22839714	918
chr16	22877213	22878827	22877885	919
chr16	23166561	23167907	23166882	920
chr16	23235107	23236134	23235554	921
chr16	23239981	23241541	23240971	922
chr16	23270438	23271282	23270875	923
chr16	23272030	23273198	23272823	924
chr16	23314493	23315667	23315021	925
chr16	23518662	23519643	23519054	926
chr16	26099152	26100036	26099752	927
chr16	26609400	26610161	26609849	928
chr16	26626062	26626888	26626369	929
chr16	28952897	28953818	28953324	930
chr16	29754556	29755638	29755099	931
chr16	29968250	29969481	29968821	932
chr16	30475663	30476539	30476277	933
chr16	30513344	30514546	30513930	934
chr16	31598441	31599407	31599143	935
chr16	31603166	31604012	31603595	936
chr16	31608447	31609787	31609295	937
chr16	32936810	32938074	32937286	938
chr16	32978424	32979171	32978662	939
chr16	33459532	33460664	33460146	940
chr16	33907595	33908980	33908066	941
chr16	34926171	34927745	34927247	942
chr16	38245378	38246603	38246205	943
chr16	38635936	38637206	38636281	944
chr16	38653094	38654139	38653622	945
chr16	38697504	38698472	38697904	946
chr16	38945372	38948138	38945893	947
chr16	40289992	40291398	40290519	948
chr16	43577034	43578128	43577648	949
chr16	44544659	44546053	44545476	950
chr16	44951423	44952470	44951938	951
chr16	44983584	44984805	44984049	952
chr16	45078876	45080370	45079685	953
chr16	45244417	45245909	45245342	954
chr16	45327946	45329125	45328640	955
chr16	45832191	45832947	45832659	956
chr16	45837648	45838812	45838157	957
chr16	48646023	48647203	48646572	958
chr16	52262350	52263295	52262798	959
chr16	52322205	52323406	52322852	960
chr16	52392141	52393192	52392631	961
chr16	57251892	57252987	57252521	962
chr16	57641308	57642298	57641968	963
chr16	57671365	57672442	57671888	964
chr16	57681911	57683126	57682422	965
chr16	57690303	57691377	57690954	966
chr16	58501534	58502553	58502149	967
chr16	58569237	58570280	58569799	968
chr16	65829379	65830526	65829980	969
chr16	74526596	74527721	74527166	970
chr16	84378539	84379438	84378915	971
chr16	84739461	84740326	84739981	972
chr16	84972059	84972743	84972490	973
chr16	85019248	85020242	85019784	974
chr16	85095027	85095876	85095306	975
chr16	85099521	85100635	85100053	976
chr16	85841902	85842906	85842412	977
chr16	85983569	85984808	85984167	978
chr16	86142275	86145587	86144259	979
chr16	86453991	86454971	86454424	980
chr16	86473586	86474415	86473901	981
chr16	86493998	86494835	86494374	982
chr16	86575174	86576403	86575901	983
chr16	87318877	87319952	87319550	984
chr16	87756768	87757608	87757148	985
chr16	91962394	91963371	91962903	986
chr16	92200830	92201641	92201224	987
chr16	92930036	92931145	92930542	988
chr16	93263993	93265009	93264558	989
chr16	94055272	94056333	94055872	990
chr16	94538164	94538824	94538421	991
chr16	97742728	97744096	97743561	992
chr17	3335679	3336617	3336090	993
chr17	8640185	8641590	8640700	994
chr17	8700681	8702060	8701265	995
chr17	8747441	8748727	8748172	996
chr17	9731066	9731969	9731420	997
chr17	10519159	10520050	10519635	998
chr17	10583209	10584136	10583643	999
chr17	10591059	10592212	10591771	1000
chr17	10598740	10599351	10598971	1001
chr17	12118226	12119656	12119222	1002
chr17	12536343	12537511	12536721	1003
chr17	12916305	12916867	12916669	1004
chr17	13859458	13860124	13859667	1005
chr17	14057568	14058460	14057919	1006
chr17	14855634	14856624	14856168	1007
chr17	14883016	14884798	14884289	1008
chr17	14926257	14928055	14927256	1009
chr17	16130128	16131453	16130743	1010
chr17	17928493	17929368	17928959	1011
chr17	21860173	21861485	21860871	1012
chr17	24013095	24014635	24014002	1013
chr17	26787149	26788303	26787872	1014
chr17	27175135	27175922	27175551	1015
chr17	27278577	27279637	27279065	1016
chr17	31790519	31791597	31791038	1017
chr17	31806665	31807730	31807268	1018
chr17	33920180	33920823	33920565	1019
chr17	35889015	35890349	35889951	1020
chr17	35949861	35950844	35950455	1021
chr17	42847629	42848819	42848235	1022
chr17	42878392	42879275	42878802	1023
chr17	44724673	44726170	44725077	1024
chr17	44846333	44847505	44846938	1025
chr17	45156685	45157748	45157245	1026
chr17	45170092	45171498	45170917	1027
chr17	45530910	45531878	45531365	1028
chr17	47003776	47004361	47003975	1029
chr17	47432127	47433702	47432632	1030
chr17	47664081	47665118	47664652	1031
chr17	47893671	47894562	47894172	1032
chr17	47899603	47900546	47900160	1033
chr17	48375563	48376690	48376432	1034
chr17	49763759	49764874	49763968	1035
chr17	58734568	58735501	58735071	1036
chr17	63109898	63110956	63110638	1037
chr17	64660385	64661314	64660827	1038
chr17	64711514	64712550	64712018	1039
chr17	64993291	64994793	64993793	1040
chr17	64999759	65000804	65000255	1041
chr17	65031083	65031980	65031477	1042
chr17	65755142	65756334	65755678	1043
chr17	66050423	66052360	66051677	1044
chr17	67034076	67034805	67034384	1045
chr17	67193191	67194001	67193620	1046
chr17	67293479	67294645	67294069	1047
chr17	67309734	67310726	67310163	1048
chr17	67462807	67463708	67463209	1049
chr17	67473277	67474207	67473745	1050
chr17	68512799	68513975	68513537	1051
chr17	69576629	69577643	69576996	1052
chr17	71267288	71268130	71267800	1053
chr17	73274875	73276237	73275475	1054
chr17	73338016	73338841	73338429	1055
chr17	73341299	73342545	73341981	1056
chr17	73346483	73347597	73347022	1057
chr17	74160002	74161298	74160986	1058
chr17	75358405	75359613	75359063	1059
chr17	79041265	79042319	79041811	1060
chr17	79123537	79124670	79124073	1061
chr17	79569906	79571179	79570293	1062
chr17	79704949	79706063	79705468	1063
chr17	80144129	80145170	80144774	1064
chr17	80224134	80225075	80224473	1065
chr17	80234487	80236129	80235603	1066
chr17	80853573	80854477	80853956	1067
chr17	80887881	80888904	80888489	1068
chr17	81182293	81183025	81182828	1069
chr17	81195492	81196681	81196124	1070
chr17	84281878	84282860	84282337	1071
chr17	84378325	84379259	84378724	1072
chr17	84473546	84474741	84474326	1073
chr17	84493339	84494228	84493803	1074
chr17	84655463	84656375	84655775	1075
chr17	86205136	86206022	86205594	1076
chr17	86695628	86696630	86696016	1077
chr17	87573231	87575160	87574118	1078
chr17	87601563	87602640	87602185	1079
chr17	87605553	87606845	87605945	1080
chr17	87625087	87626342	87625596	1081
chr17	88530817	88531977	88531500	1082
chr17	88724886	88726289	88725768	1083
chr17	91212783	91213779	91213324	1084
chr17	91214191	91215184	91214794	1085
chr18	5215522	5216635	5216143	1086
chr18	6234718	6236416	6235355	1087
chr18	6500345	6501397	6500826	1088
chr18	11756317	11757980	11757466	1089
chr18	12016593	12017392	12017010	1090
chr18	12163004	12164114	12163551	1091
chr18	12382101	12383010	12382582	1092
chr18	12951129	12952371	12951530	1093
chr18	14909682	14910830	14910261	1094
chr18	15050791	15052026	15051614	1095
chr18	15173204	15174321	15173781	1096
chr18	15179320	15180448	15179873	1097
chr18	15650416	15651712	15650934	1098
chr18	16503785	16505064	16504383	1099
chr18	16719262	16721002	16720444	1100
chr18	16990520	16992140	16991557	1101
chr18	25223659	25224573	25224083	1102
chr18	25249751	25250649	25250163	1103
chr18	27283097	27283935	27283574	1104
chr18	31616349	31617189	31616727	1105
chr18	31625055	31627826	31627047	1106
chr18	32033764	32035029	32034365	1107
chr18	32161011	32162004	32161493	1108
chr18	34008772	34009747	34009290	1109
chr18	34202394	34203644	34202892	1110
chr18	34841426	34842590	34841956	1111
chr18	35204928	35205862	35205448	1112
chr18	35253520	35254543	35254033	1113
chr18	35260745	35261428	35261159	1114
chr18	35346232	35347336	35346666	1115
chr18	35542886	35543940	35543500	1116
chr18	35642135	35643160	35642760	1117
chr18	36010321	36010961	36010711	1118
chr18	36057999	36059392	36058372	1119
chr18	38008914	38010141	38009672	1120
chr18	39081753	39083251	39082252	1121
chr18	39392304	39392983	39392601	1122
chr18	39410308	39411390	39410768	1123
chr18	42685253	42686335	42685962	1124
chr18	44631906	44633245	44632773	1125
chr18	44776754	44777809	44777323	1126
chr18	45918692	45919665	45919092	1127
chr18	46632437	46633167	46632916	1128
chr18	47096965	47097662	47097236	1129
chr18	49263024	49264211	49263666	1130
chr18	49632531	49633752	49633154	1131
chr18	49639229	49640830	49639842	1132
chr18	49693699	49695039	49694419	1133
chr18	49751972	49752991	49752324	1134
chr18	54334238	54335558	54335019	1135
chr18	55044562	55046449	55045314	1136
chr18	55061388	55063022	55061761	1137
chr18	55070667	55071673	55071154	1138
chr18	55261530	55262418	55261814	1139
chr18	55355924	55356805	55356338	1140
chr18	55783099	55784393	55783928	1141
chr18	56296104	56297446	56296535	1142
chr18	57300735	57302800	57301168	1143
chr18	57326922	57328181	57327360	1144
chr18	57372300	57373941	57372894	1145
chr18	57396120	57397296	57396700	1146
chr18	57425721	57427324	57426779	1147
chr18	57430107	57431196	57430711	1148
chr18	57777135	57777973	57777388	1149
chr18	59311470	59312599	59312150	1150
chr18	59395009	59396063	59395564	1151
chr18	60765220	60766372	60765965	1152
chr18	60772640	60773734	60773181	1153
chr18	60778926	60781062	60780319	1154
chr18	60827929	60830693	60829407	1155
chr18	60891628	60893272	60892723	1156
chr18	60915251	60916507	60915953	1157
chr18	61388902	61390028	61389493	1158
chr18	61400753	61402440	61401298	1159
chr18	61691186	61692837	61691764	1160
chr18	64642185	64642939	64642382	1161
chr18	64844066	64845177	64844708	1162
chr18	64910117	64911492	64910917	1163
chr18	65125106	65126067	65125594	1164
chr18	65131376	65132341	65131932	1165
chr18	65144514	65145821	65145053	1166
chr18	65679756	65681317	65680210	1167
chr18	65689805	65690751	65690228	1168
chr18	66300369	66301942	66300954	1169
chr18	67657378	67658315	67657847	1170
chr18	70031184	70032341	70031793	1171
chr18	70723900	70724751	70724359	1172
chr18	70848767	70849722	70849188	1173
chr18	70851080	70852016	70851529	1174
chr18	70856889	70858355	70857633	1175
chr18	70920625	70921553	70921088	1176
chr18	75533950	75536030	75535412	1177
chr18	75638096	75639049	75638615	1178
chr18	75652808	75653724	75653285	1179
chr18	75654445	75655389	75654990	1180
chr18	75687545	75688959	75688394	1181
chr18	80850467	80851559	80851145	1182
chr18	81495641	81496501	81495979	1183
chr18	82714544	82715647	82715110	1184
chr18	82718392	82719818	82718980	1185
chr18	82999546	83000202	82999774	1186
chr18	85076523	85077480	85076986	1187
chr19	4027269	4028470	4027885	1188
chr19	4441614	4442583	4442035	1189
chr19	5344899	5346295	5345414	1190
chr19	5809816	5810860	5810331	1191
chr19	5822271	5823191	5822620	1192
chr19	8776811	8777399	8777098	1193
chr19	9097236	9098335	9097721	1194
chr19	9106853	9109662	9107141	1195
chr19	9133692	9135336	9134838	1196
chr19	9135353	9136471	9135806	1197
chr19	10013026	10013872	10013366	1198
chr19	10028606	10029503	10029138	1199
chr19	10052530	10053810	10053004	1200
chr19	10147431	10148250	10147926	1201
chr19	10347804	10349215	10348715	1202
chr19	10350837	10352357	10351992	1203
chr19	10353669	10355095	10354336	1204
chr19	10360365	10361617	10361018	1205
chr19	15654881	15655765	15655330	1206
chr19	16440174	16441713	16441158	1207
chr19	16888934	16889795	16889268	1208
chr19	17196548	17197361	17196985	1209
chr19	17330391	17332115	17331523	1210
chr19	17345272	17346548	17345988	1211
chr19	17835952	17837044	17836364	1212
chr19	18960269	18961699	18960819	1213
chr19	18964467	18965588	18964970	1214
chr19	21180368	21181216	21180951	1215
chr19	21193476	21195456	21194160	1216
chr19	22990936	22992209	22991729	1217
chr19	23423527	23425062	23424374	1218
chr19	23593902	23594729	23594392	1219
chr19	24397658	24398763	24398028	1220
chr19	24399791	24401875	24400334	1221
chr19	24481837	24482715	24482396	1222
chr19	24578790	24580265	24579801	1223
chr19	24660797	24662386	24661440	1224
chr19	24886405	24887998	24887375	1225
chr19	28425656	28426586	28426262	1226
chr19	29097771	29099641	29098457	1227
chr19	29560666	29561560	29561194	1228
chr19	29777161	29778095	29777584	1229
chr19	29909656	29910913	29910101	1230
chr19	30170552	30171290	30171049	1231
chr19	30842419	30843705	30842926	1232
chr19	33123072	33124091	33123599	1233
chr19	34852308	34853174	34852808	1234
chr19	38112523	38113201	38112896	1235
chr19	40422346	40423093	40422793	1236
chr19	40484638	40485293	40485098	1237
chr19	42203540	42204961	42203737	1238
chr19	44386083	44386974	44386632	1239
chr19	44462736	44463277	44463118	1240
chr19	45003097	45003993	45003597	1241
chr19	46289613	46290703	46290110	1242
chr19	46407256	46407991	46407481	1243
chr19	47960820	47961706	47961253	1244
chr19	47964480	47965258	47965020	1245
chr19	51556404	51557567	51556926	1246
chr19	52269466	52270424	52269935	1247
chr19	53189383	53190385	53189829	1248
chr19	53211411	53212618	53211881	1249
chr19	53806123	53807037	53806475	1250
chr19	53848579	53849740	53848962	1251
chr19	55368489	55369802	55368836	1252
chr19	55694817	55695753	55695327	1253
chr19	57273854	57274485	57274044	1254
chr19	58090604	58092010	58091391	1255
chr2	4218949	4220585	4220021	1256
chr2	4260025	4260944	4260451	1257
chr2	4381742	4382647	4382126	1258
chr2	4400252	4402321	4401337	1259
chr2	4475662	4476834	4476233	1260
chr2	4489596	4490623	4490121	1261
chr2	6287478	6288526	6288027	1262
chr2	6576355	6577237	6576916	1263
chr2	6817378	6818272	6817726	1264
chr2	11083834	11085044	11084502	1265
chr2	11085505	11086809	11086022	1266
chr2	12134455	12135545	12134933	1267
chr2	12177253	12178065	12177702	1268
chr2	12620594	12621851	12621248	1269
chr2	12642032	12643129	12642692	1270
chr2	13306183	13308411	13307718	1271
chr2	13317862	13318747	13318373	1272
chr2	13418856	13419930	13419356	1273
chr2	13479713	13480603	13480148	1274
chr2	14029073	14029989	14029511	1275
chr2	17619484	17620701	17620135	1276
chr2	17860611	17861711	17861026	1277
chr2	20804940	20806042	20805686	1278
chr2	22850972	22852320	22851811	1279
chr2	25604949	25605628	25605261	1280
chr2	25609800	25610730	25610406	1281
chr2	26165057	26166020	26165501	1282
chr2	26387237	26388063	26387558	1283
chr2	26389563	26391604	26391106	1284
chr2	26398425	26399509	26398923	1285
chr2	29303647	29304739	29304252	1286
chr2	29379624	29380650	29380183	1287
chr2	29639569	29640644	29640185	1288
chr2	30296791	30297970	30297365	1289
chr2	30672844	30673855	30673470	1290
chr2	30678544	30679425	30679057	1291
chr2	30923636	30924533	30924090	1292
chr2	30937669	30938605	30937954	1293
chr2	31612607	31613871	31613280	1294
chr2	32414500	32415728	32415397	1295
chr2	32476649	32477427	32477139	1296
chr2	33074870	33075827	33075340	1297
chr2	35333626	35334857	35334287	1298
chr2	35512808	35513615	35513129	1299
chr2	38140525	38141276	38140938	1300
chr2	38370788	38371982	38371194	1301
chr2	38390314	38392225	38391537	1302
chr2	44077169	44078866	44077761	1303
chr2	44381580	44382529	44382117	1304
chr2	44485462	44486566	44485992	1305
chr2	45143897	45144787	45144338	1306
chr2	46507760	46508952	46508292	1307
chr2	46510866	46512158	46511427	1308
chr2	50319083	50320114	50319843	1309
chr2	51363483	51364465	51363968	1310
chr2	52127531	52129487	52128787	1311
chr2	52477926	52479948	52479193	1312
chr2	52721544	52722450	52722039	1313
chr2	52725031	52725694	52725215	1314
chr2	52808740	52809839	52809433	1315
chr2	52823080	52824258	52823713	1316
chr2	52841534	52842635	52842114	1317
chr2	52846694	52847925	52847144	1318
chr2	52861484	52862361	52861933	1319
chr2	52907985	52908944	52908443	1320
chr2	58357900	58358543	58358158	1321
chr2	58426202	58427158	58426607	1322
chr2	59082310	59083564	59082914	1323
chr2	59220333	59221363	59220799	1324
chr2	59245108	59246349	59245905	1325
chr2	59588807	59589562	59589265	1326
chr2	60824058	60825085	60824569	1327
chr2	60896493	60897531	60897103	1328
chr2	63543811	63544954	63544565	1329
chr2	65060919	65061884	65061432	1330
chr2	65756172	65757325	65756878	1331
chr2	68088017	68088801	68088298	1332
chr2	71604599	71605640	71605092	1333
chr2	71963447	71964625	71964056	1334
chr2	71995230	71996066	71995734	1335
chr2	72526717	72527897	72527287	1336
chr2	72664887	72665976	72665497	1337
chr2	75520575	75521991	75521131	1338
chr2	75601172	75601865	75601591	1339
chr2	75639507	75640722	75640279	1340
chr2	75955042	75956156	75955494	1341
chr2	76169885	76170914	76170379	1342
chr2	77073750	77074691	77074504	1343
chr2	78380075	78381109	78380760	1344
chr2	78878418	78879493	78878940	1345
chr2	79053915	79054833	79054421	1346
chr2	79090276	79091367	79090859	1347
chr2	79109064	79109997	79109554	1348
chr2	79638489	79639424	79639059	1349
chr2	80345865	80347077	80346406	1350
chr2	80436671	80437761	80437214	1351
chr2	80527851	80529078	80528552	1352
chr2	83522155	83523140	83522565	1353
chr2	84384520	84386132	84385095	1354
chr2	84389539	84390478	84390125	1355
chr2	84474262	84476451	84475905	1356
chr2	84792087	84793108	84792612	1357
chr2	90325818	90327033	90326520	1358
chr2	90372969	90374735	90374323	1359
chr2	90376627	90377940	90377439	1360
chr2	90404999	90406780	90406178	1361
chr2	90952249	90953341	90952894	1362
chr2	91226280	91227665	91226953	1363
chr2	94758710	94760280	94759748	1364
chr2	101823153	101824331	101823870	1365
chr2	102712634	102714402	102713525	1366
chr2	103479700	103480852	103480317	1367
chr2	107452114	107453399	107452509	1368
chr2	108667137	108668471	108667640	1369
chr2	113234773	113235695	113235239	1370
chr2	113237807	113238965	113238517	1371
chr2	113412621	113413981	113413432	1372
chr2	113478926	113481818	113479567	1373
chr2	113529527	113530435	113530069	1374
chr2	115118519	115119606	115118970	1375
chr2	115483334	115484286	115483804	1376
chr2	115484308	115484855	115484544	1377
chr2	115605611	115606783	115606425	1378
chr2	116804802	116806251	116805300	1379
chr2	116905030	116906283	116905687	1380
chr2	117606375	117607410	117606841	1381
chr2	117712130	117713059	117712597	1382
chr2	118345544	118346537	118345986	1383
chr2	118347655	118348732	118348188	1384
chr2	123998297	123999191	123998584	1385
chr2	124574761	124575844	124575424	1386
chr2	124773935	124775251	124774722	1387
chr2	125510183	125512019	125510685	1388
chr2	125557443	125558796	125557846	1389
chr2	125634919	125636094	125635482	1390
chr2	125647120	125647966	125647484	1391
chr2	126134773	126136457	126135929	1392
chr2	128534748	128535657	128535185	1393
chr2	128563957	128565109	128564634	1394
chr2	128622093	128622893	128622648	1395
chr2	128701076	128701647	128701336	1396
chr2	128860928	128862115	128861339	1397
chr2	129230434	129231366	129230938	1398
chr2	130316626	130317972	130317460	1399
chr2	130644342	130645503	130644887	1400
chr2	130657410	130658978	130657860	1401
chr2	130701719	130702592	130702082	1402
chr2	130712865	130713925	130713319	1403
chr2	131030007	131030894	131030449	1404
chr2	131180136	131181604	131180604	1405
chr2	131537272	131538179	131537751	1406
chr2	137234919	137236016	137235535	1407
chr2	138207557	138208717	138208363	1408
chr2	141371193	141372435	141371828	1409
chr2	141492998	141493966	141493399	1410
chr2	141533188	141534380	141533802	1411
chr2	142583547	142584408	142583983	1412
chr2	144028003	144028886	144028544	1413
chr2	144732199	144733382	144732868	1414
chr2	145615057	145615772	145615246	1415
chr2	148011740	148012909	148012511	1416
chr2	150665509	150666684	150666062	1417
chr2	151929559	151930483	151930030	1418
chr2	152386190	152386861	152386409	1419
chr2	152611159	152612116	152611699	1420
chr2	152631366	152632552	152631952	1421
chr2	152645777	152647140	152646929	1422
chr2	152729801	152730854	152730090	1423
chr2	153251344	153252328	153251862	1424
chr2	153538341	153539491	153538514	1425
chr2	153795364	153796763	153796178	1426
chr2	154215667	154217079	154216710	1427
chr2	154924841	154925888	154925378	1428
chr2	155698457	155700356	155698949	1429
chr2	156028391	156029099	156028902	1430
chr2	156420629	156421670	156421170	1431
chr2	156602879	156603674	156603285	1432
chr2	157247675	157249331	157248818	1433
chr2	157594500	157595435	157594906	1434
chr2	158079288	158080161	158079842	1435
chr2	162238541	162239677	162239044	1436
chr2	163511046	163512062	163511703	1437
chr2	163902395	163903464	163902960	1438
chr2	163975767	163976539	163976300	1439
chr2	164188763	164189774	164189215	1440
chr2	164211642	164212484	164211970	1441
chr2	164257857	164258937	164258398	1442
chr2	165967819	165968981	165968315	1443
chr2	166507957	166509069	166508650	1444
chr2	167552255	167553221	167552845	1445
chr2	167602834	167603811	167603442	1446
chr2	169824147	169825622	169825221	1447
chr2	172663417	172664207	172663924	1448
chr2	173083858	173085410	173084586	1449
chr2	173238930	173239846	173239501	1450
chr2	173244838	173247424	173246897	1451
chr2	173277031	173278290	173277738	1452
chr2	174268036	174268749	174268551	1453
chr2	180721964	180723108	180722673	1454
chr3	8955443	8956312	8955943	1455
chr3	9033375	9034800	9033818	1456
chr3	9717453	9718396	9717676	1457
chr3	9750716	9751962	9751158	1458
chr3	10022223	10023290	10022679	1459
chr3	10446238	10447404	10446769	1460
chr3	10450511	10451255	10451061	1461
chr3	19305862	19307235	19306479	1462
chr3	19856494	19857449	19857051	1463
chr3	19878227	19879246	19878741	1464
chr3	27092608	27093672	27093207	1465
chr3	29851258	29853056	29852576	1466
chr3	29990517	29991921	29991145	1467
chr3	30025900	30026820	30026406	1468
chr3	30920777	30922508	30921984	1469
chr3	31159288	31160533	31159780	1470
chr3	32540724	32541615	32541263	1471
chr3	34342075	34343437	34342715	1472
chr3	34343891	34344800	34344341	1473
chr3	36348056	36349112	36348427	1474
chr3	36366275	36367208	36366711	1475
chr3	36379156	36380151	36379691	1476
chr3	36380310	36381391	36380794	1477
chr3	37780818	37782306	37781575	1478
chr3	38594624	38595389	38594958	1479
chr3	38596453	38597651	38597148	1480
chr3	38621930	38622866	38622398	1481
chr3	40997861	40999904	40999401	1482
chr3	41004083	41005026	41004555	1483
chr3	51302455	51303612	51302867	1484
chr3	51553528	51554701	51554043	1485
chr3	51937309	51937866	51937506	1486
chr3	51940297	51941443	51940888	1487
chr3	51984157	51985346	51984980	1488
chr3	52875861	52877099	52876526	1489
chr3	52913424	52914422	52913998	1490
chr3	53005411	53006552	53005785	1491
chr3	53007928	53009594	53009109	1492
chr3	53014645	53015611	53015412	1493
chr3	54247599	54248502	54247971	1494
chr3	54899895	54900846	54900468	1495
chr3	55137156	55138351	55137553	1496
chr3	59882578	59883492	59883015	1497
chr3	60308759	60309704	60309295	1498
chr3	60406685	60407795	60407225	1499
chr3	61020267	61021598	61020609	1500
chr3	61204444	61205474	61205014	1501
chr3	61219662	61220791	61220197	1502
chr3	61223256	61224293	61223811	1503
chr3	62253548	62254374	62253968	1504
chr3	62948463	62949854	62949191	1505
chr3	63675138	63675998	63675537	1506
chr3	65156900	65157849	65157268	1507
chr3	65167555	65168462	65167968	1508
chr3	65372096	65373018	65372475	1509
chr3	65382950	65384124	65383659	1510
chr3	65407042	65408148	65407589	1511
chr3	65430786	65431933	65431305	1512
chr3	66012564	66013728	66013295	1513
chr3	66095999	66096956	66096405	1514
chr3	75745711	75746921	75746416	1515
chr3	79065876	79066529	79066282	1516
chr3	79168573	79169421	79168993	1517
chr3	79335407	79336691	79336134	1518
chr3	79700980	79702624	79701622	1519
chr3	79707212	79708594	79708031	1520
chr3	79713793	79715278	79714359	1521
chr3	79719763	79720908	79720318	1522
chr3	79722440	79724208	79723656	1523
chr3	79739771	79741757	79740229	1524
chr3	79778731	79779821	79779286	1525
chr3	79781152	79783170	79781939	1526
chr3	79792485	79794407	79793455	1527
chr3	79806754	79808093	79807468	1528
chr3	79856472	79857901	79856971	1529
chr3	80697220	80698249	80697619	1530
chr3	80709536	80710231	80709964	1531
chr3	84295793	84296766	84296221	1532
chr3	86954154	86955522	86954799	1533
chr3	86955898	86957545	86956618	1534
chr3	86960946	86962469	86961522	1535
chr3	88292081	88293338	88292572	1536
chr3	88313579	88314616	88314117	1537
chr3	90390490	90391518	90391048	1538
chr3	93382992	93383663	93383389	1539
chr3	95097254	95098481	95097802	1540
chr3	95499572	95500936	95500429	1541
chr3	95816385	95817820	95817025	1542
chr3	95820517	95821733	95821154	1543
chr3	96856063	96856946	96856610	1544
chr3	97797101	97797812	97797300	1545
chr3	97846705	97847631	97847208	1546
chr3	97908708	97910131	97909120	1547
chr3	98159456	98160268	98159848	1548
chr3	100031199	100032104	100031532	1549
chr3	101212572	101213485	101213042	1550
chr3	101300550	101301824	101300995	1551
chr3	101303251	101305317	101304454	1552
chr3	101317188	101318687	101317764	1553
chr3	101354702	101356054	101355560	1554
chr3	101399850	101400699	101400322	1555
chr3	102143606	102144727	102144122	1556
chr3	102157127	102158377	102157630	1557
chr3	104163881	104165025	104164475	1558
chr3	104796361	104797553	104796926	1559
chr3	107069199	107070028	107069531	1560
chr3	107332208	107333513	107333074	1561
chr3	107339839	107340816	107340317	1562
chr3	108098964	108099914	108099351	1563
chr3	108174852	108176183	108175332	1564
chr3	108370648	108371913	108371201	1565
chr3	108661299	108661927	108661668	1566
chr3	110296885	110298037	110297651	1567
chr3	115540501	115541391	115540889	1568
chr3	120872298	120873807	120872976	1569
chr3	120906667	120907350	120907064	1570
chr3	120923780	120924786	120924321	1571
chr3	121082364	121083184	121082862	1572
chr3	121224234	121225405	121224939	1573
chr3	121403091	121404159	121403558	1574
chr3	121800017	121801103	121800541	1575
chr3	122067087	122068175	122067745	1576
chr3	122173728	122174836	122174281	1577
chr3	123082185	123083230	123082805	1578
chr3	123182690	123183938	123183340	1579
chr3	123388100	123389522	123388522	1580
chr3	123409375	123410635	123410080	1581
chr3	126517190	126518203	126517722	1582
chr3	126533876	126535276	126534556	1583
chr3	126830080	126831320	126830621	1584
chr3	126832872	126834054	126833523	1585
chr3	127355069	127355905	127355479	1586
chr3	127544579	127545631	127545014	1587
chr3	127570919	127571989	127571427	1588
chr3	129967314	129968423	129967687	1589
chr3	130653356	130655165	130654658	1590
chr3	131325284	131326418	131325691	1591
chr3	132535932	132537670	132537149	1592
chr3	135333529	135334397	135334017	1593
chr3	137767688	137768621	137768166	1594
chr3	141172278	141173340	141172744	1595
chr3	141978341	141980481	141979246	1596
chr3	144040335	144042124	144041290	1597
chr3	144613395	144614406	144614057	1598
chr3	145507722	145508658	145508177	1599
chr3	148274579	148276494	148275678	1600
chr3	148437198	148438199	148437619	1601
chr3	152146483	152147980	152147381	1602
chr3	152230734	152233030	152231907	1603
chr3	152262158	152263277	152262633	1604
chr3	153752847	153753724	153753172	1605
chr3	154318437	154319382	154318889	1606
chr3	154354563	154356587	154355419	1607
chr4	6199348	6200627	6200153	1608
chr4	6219619	6220209	6219920	1609
chr4	8532422	8533426	8532919	1610
chr4	14484892	14486040	14485594	1611
chr4	14729980	14731562	14730510	1612
chr4	26202528	26203612	26203333	1613
chr4	26891670	26893688	26892219	1614
chr4	30717329	30718155	30717736	1615
chr4	32384057	32384869	32384443	1616
chr4	34503176	34503969	34503537	1617
chr4	34914080	34914800	34914334	1618
chr4	41567395	41568884	41567965	1619
chr4	41578277	41579356	41578932	1620
chr4	41579698	41581379	41580206	1621
chr4	43104933	43105757	43105276	1622
chr4	43811578	43812658	43812099	1623
chr4	44110185	44111436	44110742	1624
chr4	44119637	44120958	44120481	1625
chr4	44121579	44122425	44121897	1626
chr4	44745651	44746375	44746099	1627
chr4	45497742	45498659	45498042	1628
chr4	45700938	45701692	45701267	1629
chr4	45701803	45703334	45702217	1630
chr4	46078482	46079379	46078935	1631
chr4	46104970	46105939	46105391	1632
chr4	46435245	46436083	46435661	1633
chr4	47153775	47155080	47154588	1634
chr4	47616230	47617195	47616766	1635
chr4	52606628	52607982	52607414	1636
chr4	53240272	53241333	53240850	1637
chr4	53315827	53317523	53316633	1638
chr4	55053094	55053750	55053404	1639
chr4	55486573	55487715	55487358	1640
chr4	56912552	56914269	56913719	1641
chr4	57179794	57181014	57180444	1642
chr4	57184395	57185320	57184905	1643
chr4	57556153	57557286	57556770	1644
chr4	57747803	57749009	57748422	1645
chr4	57810581	57811964	57811075	1646
chr4	57817078	57818494	57817899	1647
chr4	59335426	59336900	59336074	1648
chr4	59342390	59343573	59343056	1649
chr4	59843703	59844612	59844050	1650
chr4	63299100	63300385	63299838	1651
chr4	63957453	63958725	63958148	1652
chr4	64249893	64251016	64250569	1653
chr4	64255725	64256796	64256248	1654
chr4	64295985	64297583	64296776	1655
chr4	64301644	64303133	64302124	1656
chr4	65326758	65327501	65327084	1657
chr4	70126424	70127575	70126921	1658
chr4	77493916	77494869	77494435	1659
chr4	80433740	80435353	80434759	1660
chr4	80442630	80444373	80443495	1661
chr4	80473822	80474756	80474296	1662
chr4	80683146	80683882	80683412	1663
chr4	81572179	81573284	81572726	1664
chr4	82948822	82949631	82949227	1665
chr4	82954350	82955576	82954992	1666
chr4	84196915	84198006	84197464	1667
chr4	84331317	84332221	84331684	1668
chr4	86329483	86330108	86329835	1669
chr4	88605474	88606265	88605709	1670
chr4	88658551	88659683	88659109	1671
chr4	88677041	88677954	88677558	1672
chr4	88679814	88680903	88680383	1673
chr4	88686312	88687463	88686888	1674
chr4	89092416	89093215	89092831	1675
chr4	89094155	89095257	89094861	1676
chr4	89194340	89195421	89194871	1677
chr4	94851815	94852925	94852344	1678
chr4	95333166	95333853	95333408	1679
chr4	95400007	95401023	95400664	1680
chr4	95512402	95513465	95512835	1681
chr4	96212187	96213403	96212951	1682
chr4	97570970	97571976	97571604	1683
chr4	97749425	97750736	97750144	1684
chr4	98410214	98411092	98410700	1685
chr4	98422366	98424063	98423081	1686
chr4	98471613	98473537	98472594	1687
chr4	98540010	98541132	98540438	1688
chr4	98933128	98934347	98933622	1689
chr4	99142061	99143150	99142708	1690
chr4	99158037	99159587	99158855	1691
chr4	99178506	99179512	99179116	1692
chr4	99188457	99190501	99189856	1693
chr4	99438831	99440469	99439495	1694
chr4	99645330	99646140	99645723	1695
chr4	99832789	99833706	99833276	1696
chr4	102182778	102184232	102183699	1697
chr4	102203023	102204114	102203638	1698
chr4	102846312	102847283	102846761	1699
chr4	105904748	105905618	105905145	1700
chr4	106594592	106595245	106594776	1701
chr4	108897277	108898191	108897839	1702
chr4	111363079	111364613	111363921	1703
chr4	114451583	114453047	114452385	1704
chr4	115285820	115286647	115286221	1705
chr4	115710631	115711770	115710998	1706
chr4	115849105	115849931	115849571	1707
chr4	115866326	115867435	115866803	1708
chr4	116340510	116341522	116341011	1709
chr4	117574885	117576210	117575723	1710
chr4	117688821	117690520	117689946	1711
chr4	118020224	118021280	118020769	1712
chr4	120494088	120495748	120494571	1713
chr4	120674638	120675776	120675205	1714
chr4	120899356	120900159	120899824	1715
chr4	123080963	123081993	123081600	1716
chr4	123090861	123091843	123091406	1717
chr4	123099839	123100780	123100339	1718
chr4	125321847	125323321	125322654	1719
chr4	125808521	125810362	125809266	1720
chr4	128516750	128518050	128517500	1721
chr4	128576420	128577083	128576890	1722
chr4	128657419	128658939	128658412	1723
chr4	128945632	128946467	128946167	1724
chr4	130066648	130067524	130067169	1725
chr4	130384544	130385909	130384867	1726
chr4	132607759	132608641	132608139	1727
chr4	133169954	133170968	133170662	1728
chr4	133920823	133921768	133921388	1729
chr4	134156248	134157932	134156717	1730
chr4	134574302	134575719	134575191	1731
chr4	134635461	134637038	134635863	1732
chr4	134702135	134703062	134702533	1733
chr4	135061315	135062652	135061854	1734
chr4	135230971	135231911	135231466	1735
chr4	135695796	135698344	135696515	1736
chr4	137029522	137030666	137030072	1737
chr4	137058840	137060253	137059593	1738
chr4	138769498	138770458	138769985	1739
chr4	138772389	138773508	138772749	1740
chr4	138787797	138789684	138788526	1741
chr4	139154750	139155642	139155221	1742
chr4	139686871	139687914	139687453	1743
chr4	140052839	140053809	140053218	1744
chr4	140093463	140094340	140093898	1745
chr4	140180005	140181023	140180597	1746
chr4	140186404	140187206	140186740	1747
chr4	140212199	140213088	140212702	1748
chr4	140213367	140214338	140213768	1749
chr4	140485216	140486318	140485721	1750
chr4	140500433	140501749	140500973	1751
chr4	141056264	141057012	141056709	1752
chr4	141225998	141226907	141226397	1753
chr4	141608534	141609273	141608731	1754
chr4	144519612	144520983	144520179	1755
chr4	144538924	144540283	144539565	1756
chr4	144570609	144571574	144571240	1757
chr4	144589427	144590773	144590039	1758
chr4	144593593	144594939	144594250	1759
chr4	144600829	144601888	144601390	1760
chr4	144640441	144642100	144641067	1761
chr4	144691664	144693057	144692180	1762
chr4	148870417	148871189	148870715	1763
chr4	149353728	149354554	149354182	1764
chr4	149443957	149444987	149444422	1765
chr4	149550688	149551911	149551335	1766
chr4	149574862	149575938	149575543	1767
chr4	149589759	149591185	149590662	1768
chr4	149600701	149601862	149601069	1769
chr4	150119900	150120885	150120372	1770
chr4	150132427	150133627	150133161	1771
chr4	151566219	151567872	151566810	1772
chr4	154487823	154488532	154488286	1773
chr4	154507850	154508920	154508144	1774
chr5	3989303	3990209	3989791	1775
chr5	5105381	5106111	5105702	1776
chr5	5510212	5511220	5510798	1777
chr5	5540339	5541449	5541096	1778
chr5	10670647	10671573	10671095	1779
chr5	12582426	12583830	12582903	1780
chr5	12639178	12640187	12639753	1781
chr5	14049409	14050551	14050006	1782
chr5	17128705	17129763	17129258	1783
chr5	17152928	17154200	17153720	1784
chr5	17179244	17180567	17180028	1785
chr5	17213846	17215065	17214480	1786
chr5	20680820	20682146	20681057	1787
chr5	21071028	21072039	21071562	1788
chr5	28037899	28038892	28038402	1789
chr5	30168891	30170451	30169628	1790
chr5	31204120	31204896	31204549	1791
chr5	31932045	31933128	31932649	1792
chr5	32707261	32708350	32707833	1793
chr5	34161309	34162194	34161832	1794
chr5	36250250	36251165	36250723	1795
chr5	36508029	36509214	36508669	1796
chr5	36545955	36546738	36546290	1797
chr5	36655956	36657044	36656575	1798
chr5	39249167	39249952	39249521	1799
chr5	39534700	39535573	39535053	1800
chr5	39536386	39537686	39537047	1801
chr5	39605961	39606888	39606383	1802
chr5	39715501	39716550	39716073	1803
chr5	44590196	44591304	44590804	1804
chr5	48653077	48654154	48653584	1805
chr5	51935211	51936005	51935587	1806
chr5	53135394	53137087	53136544	1807
chr5	53283452	53284388	53283958	1808
chr5	58349773	58350685	58350130	1809
chr5	58534508	58536286	58535332	1810
chr5	62858838	62860036	62859478	1811
chr5	63080960	63081834	63081378	1812
chr5	64502926	64504479	64503593	1813
chr5	64780249	64781405	64780710	1814
chr5	65268854	65270334	65269254	1815
chr5	66843881	66844786	66844311	1816
chr5	67383811	67385121	67384489	1817
chr5	73625397	73627102	73626430	1818
chr5	73774563	73775636	73775156	1819
chr5	75861336	75862330	75861878	1820
chr5	76049147	76050225	76049667	1821
chr5	77803374	77804296	77803957	1822
chr5	77974395	77975799	77975187	1823
chr5	81692213	81693241	81692724	1824
chr5	81903199	81904471	81903723	1825
chr5	86050000	86050729	86050223	1826
chr5	89798906	89799625	89799373	1827
chr5	92644168	92645224	92644548	1828
chr5	92788613	92790031	92789434	1829
chr5	92800371	92801402	92800677	1830
chr5	92805818	92807133	92806518	1831
chr5	92922080	92922920	92922475	1832
chr5	93558983	93559733	93559338	1833
chr5	98376726	98377579	98377072	1834
chr5	99378898	99380612	99379853	1835
chr5	101050671	101051256	101051024	1836
chr5	101051518	101052468	101051998	1837
chr5	102299296	102300120	102299742	1838
chr5	104049027	104050318	104049875	1839
chr5	104445458	104446190	104445862	1840
chr5	104471091	104473272	104471615	1841
chr5	104836425	104838238	104837040	1842
chr5	105829047	105830224	105829601	1843
chr5	105970052	105970830	105970520	1844
chr5	106122819	106124230	106123194	1845
chr5	106144493	106145268	106144984	1846
chr5	106207389	106209218	106208021	1847
chr5	107498949	107499682	107499258	1848
chr5	109126115	109126923	109126555	1849
chr5	111633778	111635278	111634177	1850
chr5	111685127	111685827	111685546	1851
chr5	112840529	112841757	112841193	1852
chr5	114322702	114323998	114323197	1853
chr5	114368489	114369472	114368941	1854
chr5	115029538	115030490	115029981	1855
chr5	119340759	119341956	119341315	1856
chr5	123143037	123144235	123143500	1857
chr5	123866466	123867325	123866688	1858
chr5	124496691	124497680	124497191	1859
chr5	128090824	128091898	128091373	1860
chr5	132121037	132122185	132121745	1861
chr5	132705196	132706101	132705577	1862
chr5	135087336	135088259	135087822	1863
chr5	135739643	135740710	135740247	1864
chr5	135917925	135918954	135918512	1865
chr5	136098655	136099456	136099085	1866
chr5	136527138	136528100	136527598	1867
chr5	138200788	138201664	138201334	1868
chr5	138407264	138408502	138407740	1869
chr5	138573713	138574327	138573912	1870
chr5	139252203	139252861	139252528	1871
chr5	139427689	139428848	139427903	1872
chr5	139428855	139429615	139429052	1873
chr5	139445590	139446438	139446202	1874
chr5	139854673	139855726	139855229	1875
chr5	140130288	140131076	140130484	1876
chr5	140591822	140592420	140592241	1877
chr5	142169264	142170196	142169763	1878
chr5	142888728	142889827	142888921	1879
chr5	142907792	142908933	142908493	1880
chr5	143715053	143716047	143715480	1881
chr5	143720756	143721489	143721024	1882
chr5	143841236	143842138	143841658	1883
chr5	144429964	144431449	144430954	1884
chr5	144431452	144432416	144431934	1885
chr5	144435246	144436005	144435633	1886
chr5	144979914	144980839	144980440	1887
chr5	145073748	145074662	145074173	1888
chr5	145079007	145080128	145079751	1889
chr5	145658962	145660044	145659588	1890
chr5	145675223	145676095	145675505	1891
chr5	145694388	145695371	145694920	1892
chr5	145864829	145865977	145865414	1893
chr5	146224974	146225651	146225296	1894
chr5	149195432	149196523	149196005	1895
chr5	149294981	149295763	149295515	1896
chr5	149297364	149298354	149297930	1897
chr5	149580771	149581626	149581201	1898
chr5	150115218	150116122	150115589	1899
chr5	150122851	150123830	150123300	1900
chr5	151914989	151916031	151915498	1901
chr5	151966720	151967666	151967157	1902
chr5	152020979	152022166	152021603	1903
chr6	4121390	4122229	4121878	1904
chr6	4626793	4627858	4627349	1905
chr6	4931760	4933329	4932745	1906
chr6	5404922	5406672	5406128	1907
chr6	6634257	6636638	6635850	1908
chr6	12404632	12405622	12405299	1909
chr6	12470081	12471846	12471059	1910
chr6	17092351	17093696	17093168	1911
chr6	17116156	17118145	17116978	1912
chr6	17362392	17363879	17362802	1913
chr6	17400036	17401132	17400636	1914
chr6	17409146	17410356	17409709	1915
chr6	17440197	17441591	17440703	1916
chr6	17451346	17452556	17451755	1917
chr6	17465374	17467173	17466763	1918
chr6	17538375	17539171	17538706	1919
chr6	18765164	18766369	18765791	1920
chr6	22161750	22162795	22162272	1921
chr6	25394857	25396273	25395448	1922
chr6	28945822	28947057	28946344	1923
chr6	28981329	28982716	28982156	1924
chr6	29015947	29017548	29016699	1925
chr6	29267058	29269526	29268250	1926
chr6	30036062	30037172	30036668	1927
chr6	30684215	30685415	30684490	1928
chr6	31024897	31026361	31025467	1929
chr6	31037887	31039350	31038631	1930
chr6	31227374	31228828	31227902	1931
chr6	31322090	31323455	31322907	1932
chr6	32270714	32271891	32271389	1933
chr6	34447790	34448887	34448295	1934
chr6	37306259	37307469	37306797	1935
chr6	37360915	37362406	37361986	1936
chr6	38031514	38033245	38031855	1937
chr6	39268360	39269819	39269302	1938
chr6	40989305	40990315	40989812	1939
chr6	42462622	42464314	42463666	1940
chr6	42515756	42517379	42516075	1941
chr6	48459974	48461223	48460662	1942
chr6	48734759	48736316	48735709	1943
chr6	48970740	48972373	48971511	1944
chr6	48977570	48979361	48978282	1945
chr6	49045946	49047790	49046579	1946
chr6	49064668	49065890	49065208	1947
chr6	50204481	50205439	50205131	1948
chr6	51855248	51856212	51855800	1949
chr6	51937711	51939214	51938389	1950
chr6	51944342	51945766	51945179	1951
chr6	51948389	51949635	51948958	1952
chr6	52007822	52009686	52008371	1953
chr6	52843758	52845063	52844309	1954
chr6	54959257	54960273	54959802	1955
chr6	56473728	56475177	56474404	1956
chr6	56635978	56637737	56636605	1957
chr6	56798636	56799575	56799198	1958
chr6	65838203	65839774	65838674	1959
chr6	67078210	67079344	67078757	1960
chr6	72166388	72167413	72166791	1961
chr6	72332685	72333926	72333391	1962
chr6	72462312	72463425	72462850	1963
chr6	72492907	72493929	72493368	1964
chr6	72502484	72503746	72502845	1965
chr6	72660962	72661935	72661545	1966
chr6	72718448	72719953	72719012	1967
chr6	73160062	73161387	73160697	1968
chr6	76495512	76497192	76496412	1969
chr6	82946362	82948311	82947797	1970
chr6	82949741	82950874	82950339	1971
chr6	82956980	82958369	82957727	1972
chr6	84535342	84536335	84535872	1973
chr6	86462901	86463984	86463500	1974
chr6	88334108	88336417	88334735	1975
chr6	88365359	88367013	88366484	1976
chr6	88525943	88526863	88526523	1977
chr6	88580802	88581914	88581294	1978
chr6	88591172	88592127	88591738	1979
chr6	88633342	88634845	88634326	1980
chr6	88874341	88875492	88875148	1981
chr6	88921614	88923023	88921943	1982
chr6	89185369	89186843	89185846	1983
chr6	89297617	89299262	89298624	1984
chr6	90309189	90310910	90310278	1985
chr6	90420924	90421870	90421396	1986
chr6	90457766	90458860	90458368	1987
chr6	91509068	91510051	91509440	1988
chr6	91568457	91571558	91570289	1989
chr6	91624240	91625854	91625338	1990
chr6	91628859	91630312	91629433	1991
chr6	91861637	91863049	91862550	1992
chr6	96759125	96760183	96759667	1993
chr6	97107716	97109267	97108311	1994
chr6	97930986	97932767	97931984	1995
chr6	97995674	97997667	97996901	1996
chr6	100455186	100456466	100455843	1997
chr6	100656804	100658392	100657669	1998
chr6	100737096	100738525	100737484	1999
[truncated: 490 more rows]

## Sheet: S8. kmer-SVM predictions mm9
chr	start	end	SVM score
chr1	53589200	53589900	3.29192
chr3	142356800	142357600	3.19166
chr15	32331600	32332300	3.15537
chr6	18811200	18811900	3.06665
chr13	32359100	32359700	3.0349
chrX	18510600	18511200	2.99757
chr18	31386900	31387500	2.98438
chr4	44791100	44791700	2.96437
chrX	51346000	51346500	2.94265
chr19	22731200	22731800	2.93077
chr14	61580700	61582100	2.92554
chr1	93297500	93298100	2.9253
chr13	51324300	51324800	2.90173
chr4	118401200	118401700	2.88225
chrX	153463300	153464000	2.86371
chr12	28663600	28664100	2.83814
chr14	9216800	9217400	2.82226
chr17	89212100	89212800	2.81835
chr15	96325700	96326300	2.81211
chr6	145602700	145603500	2.79509
chr4	139243800	139244500	2.78109
chr14	61576200	61577300	2.75845
chr6	36621300	36621900	2.75067
chr2	40782100	40782700	2.7483
chr7	61128200	61128700	2.70888
chr12	34536500	34537100	2.67029
chr17	66531100	66531600	2.65615
chr2	135734600	135735100	2.63818
chr3	34230600	34231300	2.58526
chr2	15552700	15553300	2.57435
chr10	11458100	11458700	2.56869
chr14	46764300	46764800	2.55999
chr12	116283000	116283700	2.55989
chr2	116243300	116243900	2.55321
chr11	31037900	31038400	2.54431
chr14	54263400	54263900	2.53689
chr9	75538000	75538400	2.53377
chr5	90305600	90306200	2.53291
chr2	16812100	16812500	2.52489
chr13	42714900	42715500	2.51916
chr8	122132400	122133000	2.50785
chr11	49356600	49357200	2.50568
chr19	6951300	6951800	2.50112
chr10	109525500	109526000	2.49803
chr1	152909300	152910000	2.48038
chr1	24560300	24560900	2.46134
chr4	103584600	103585100	2.44762
chr5	133129700	133130400	2.44273
chr10	21771000	21771600	2.43888
chr6	139684600	139685100	2.43708
chr8	37147200	37147700	2.43381
chr3	72057200	72057700	2.42938
chr2	92264700	92265300	2.42887
chr16	13622300	13622700	2.42747
chr1	36109600	36110200	2.42012
chr11	56311400	56311800	2.4181
chr4	30860500	30860900	2.41546
chr6	67730900	67731400	2.41351
chr7	85033400	85033900	2.41316
chr18	46598400	46598900	2.4126
chr8	124691300	124691900	2.40881
chr14	58458600	58459300	2.40803
chr10	23394400	23395000	2.40281
chr5	22115200	22115800	2.40096
chr2	83903600	83904000	2.39609
chr1	195291200	195291800	2.39525
chr13	6192300	6192900	2.38952
chr5	15037900	15038500	2.38594
chr13	24827600	24828100	2.38291
chr8	8532800	8533400	2.36996
chr18	68513900	68514400	2.36794
chr14	61549600	61550500	2.35873
chr14	41715800	41716200	2.35248
chr18	57418800	57419400	2.35195
chr18	20359500	20360000	2.34872
chr5	95443600	95444100	2.34367
chr10	77046400	77047000	2.34058
chr17	21369000	21369500	2.33944
chr11	110559400	110560100	2.33444
chr12	100934000	100934600	2.33228
chr3	153744800	153745400	2.33164
chr8	37382800	37383400	2.32437
chr18	18601800	18602300	2.32308
chr3	146106100	146106800	2.31653
chr13	70853300	70853700	2.30567
chr13	20719300	20719700	2.29993
chr2	30605400	30605900	2.29976
chr3	17453700	17454200	2.2954
chr11	71567200	71567700	2.29521
chr1	174516200	174516700	2.29406
chr6	115959400	115960000	2.29117
chr15	8815400	8815900	2.28828
chrX	123936700	123937300	2.28753
chr13	30104800	30105300	2.28536
chr11	61836700	61837200	2.27947
chr4	47331300	47331800	2.27766
chr1	187411700	187412400	2.27674
chr4	36371700	36372400	2.2724
chr11	83914500	83915100	2.27239
chr8	86860100	86860700	2.27224
chr10	8991900	8992400	2.27111
chr13	77805600	77806200	2.26641
chr11	22974700	22975200	2.26117
chr18	69941700	69942400	2.26017
chr2	35754200	35754700	2.2594
chr17	31883500	31884100	2.2564
chr14	99848400	99848900	2.24906
chr16	45982700	45983100	2.24874
chr7	76444500	76445000	2.23732
chr2	38552900	38553300	2.2312
chr5	117963200	117963600	2.23062
chr2	39306100	39306600	2.22752
chr6	58778500	58779100	2.22571
chr18	84896800	84897300	2.22569
chr10	106939400	106939800	2.22374
chr10	44147500	44148100	2.21857
chr8	127925300	127925800	2.21585
chr18	25557400	25557900	2.21421
chr4	65081700	65082300	2.21146
chrX	13880900	13881400	2.20852
chr8	11730100	11730600	2.208
chr15	20115100	20115500	2.20774
chr1	176756800	176757300	2.20652
chr13	42256100	42256600	2.20647
chr9	116379300	116379900	2.2019
chr19	38328800	38329400	2.19938
chr1	191230800	191231200	2.19711
chr4	14143700	14144300	2.19505
chr13	8698900	8699500	2.18782
chr4	10955700	10956100	2.18572
chr2	120163200	120163700	2.18481
chr10	52873200	52873800	2.18196
chr9	60424200	60424700	2.18158
chr5	30044100	30044600	2.18122
chr7	72891700	72892200	2.17911
chr11	53059000	53059500	2.17885
chr7	64899500	64900000	2.1747
chr5	16975900	16976400	2.16991
chr13	70815200	70815800	2.16848
chr16	8177400	8177800	2.16748
chr10	110806100	110806600	2.16665
chr16	25423000	25423600	2.16511
chr6	43263100	43263600	2.16441
chr17	17166800	17167300	2.16404
chr5	30769700	30770200	2.16327
chr13	8644600	8645300	2.16289
chr18	21090900	21091400	2.1626
chr4	144006700	144007300	2.16173
chr6	127483900	127484500	2.15937
chr8	130969300	130970000	2.15796
chr10	24786700	24787100	2.1561
chr5	32887200	32887800	2.15393
chr7	49829200	49829800	2.14979
chr5	15119500	15120000	2.14936
chr7	141199800	141200300	2.14626
chr7	145894300	145894800	2.14403
chr8	79109900	79110500	2.14246
chr3	138349700	138350300	2.14198
chr17	93383900	93384500	2.14187
chr1	114348900	114349800	2.14161
chr7	28020600	28021100	2.14066
chr6	74770600	74771100	2.13867
chr6	142224400	142225000	2.13763
chr9	18095500	18095900	2.1359
chr9	20565200	20565700	2.13455
chr4	139233300	139234000	2.13372
chrX	75588900	75589300	2.13244
chr1	184444900	184445500	2.13096
chr11	34363300	34363800	2.12898
chr19	44300200	44300800	2.1275
chr16	44397900	44398500	2.12483
chr10	32729700	32730300	2.12091
chr9	117106600	117107100	2.1171
chr1	13452400	13453100	2.11501
chr12	87579200	87579700	2.1144
chr3	32087300	32087800	2.1142
chr14	34953300	34953900	2.11336
chr8	26446900	26447400	2.11262
chrX	35784300	35784700	2.11175
chr2	131576700	131577100	2.1075
chr13	49108300	49108900	2.10322
chr15	64366700	64367300	2.10305
chr8	99307900	99308300	2.10168
chr4	22320100	22320500	2.10058
chr12	100838900	100839400	2.09951
chr8	8589200	8589800	2.09881
chr12	99908600	99909000	2.09736
chr10	129256400	129256800	2.09616
chr1	30470500	30470900	2.09471
chr8	27100600	27101000	2.09433
chr2	68788000	68788500	2.09425
chr14	47609400	47609900	2.09351
chr1	34440600	34441100	2.0911
chr10	70869300	70869700	2.08891
chr17	70347700	70348200	2.08821
chr4	58521600	58522000	2.08645
chr3	54250800	54251300	2.08551
chr3	39829000	39829600	2.082
chr10	6145500	6145900	2.08192
chr12	13488500	13489000	2.07893
chr13	35150000	35150500	2.07826
chr15	90062700	90063100	2.07783
chr5	81556000	81556400	2.07603
chrX	149046500	149047000	2.07484
chr12	92472100	92472600	2.07447
chr12	72633900	72634500	2.07382
chr11	19879000	19879600	2.06969
chr1	59666600	59667200	2.06957
chr7	150284800	150285200	2.06914
chr5	27830400	27831000	2.06756
chr9	9666000	9666400	2.06642
chr9	121869300	121869800	2.06546
chr18	3059600	3060200	2.06233
chr13	34340800	34341200	2.06171
chr5	92184900	92185300	2.06135
chr4	141827400	141827900	2.05692
chr9	83009300	83009800	2.0559
chr18	30281100	30281600	2.05493
chr1	118067800	118068300	2.05361
chr1	4478900	4479400	2.05217
chr16	52742300	52742800	2.05181
chr18	55448300	55448800	2.05148
chr1	175565700	175566200	2.05094
chr4	97505700	97506300	2.04844
chr5	95103300	95103800	2.04776
chr10	80236900	80237300	2.04714
chr14	19307300	19307700	2.04372
chr12	29733900	29734400	2.04285
chrX	44566400	44566900	2.04024
chr7	5570700	5571200	2.0344
chr19	17132300	17132700	2.03085
chr5	123282900	123283500	2.03085
chr18	8868100	8868600	2.02883
chr6	84384400	84385000	2.02821
chr17	71221900	71222500	2.02816
chr12	41183600	41184100	2.02775
chr5	90216800	90217200	2.02727
chr5	14983800	14984400	2.02455
chr3	109828800	109829200	2.01911
chr3	152974800	152975500	2.01888
chr3	64939000	64939600	2.01847
chr9	7526500	7527000	2.01358
chr9	34679000	34679600	2.01278
chr18	61051000	61051500	2.01227
chr19	61016000	61016600	2.01211
chr11	76998300	76998900	2.0105
chrX	9387200	9387800	2.00863
chr11	11223100	11223500	2.00775
chr2	114469500	114470100	2.00773
chr10	93409000	93409500	2.00587
chr10	115113600	115114100	2.00585
chr10	90142500	90143000	2.00579
chr5	96082900	96083300	2.0056
chr12	41499600	41500100	2.00522
chr2	81343500	81343900	2.00493
chr13	58366500	58367100	2.00486
chr3	131776700	131777200	2.00457
chr11	101326300	101326700	2.00411
chr15	3394400	3394900	2.00319
chr6	146794800	146795400	2.00286
chr8	85635600	85636100	2.00238
chr11	73997100	73997600	1.99838
chr4	120391800	120392300	1.998
chr2	18602700	18603300	1.99761
chrX	75596100	75596500	1.99719
chr5	111958300	111958700	1.99625
chr3	79846800	79847500	1.99415
chr4	102528700	102529200	1.99339
chr5	125501600	125502000	1.9905
chr13	33780300	33780800	1.99019
chr8	73042400	73042800	1.98881
chr5	4333100	4333500	1.98789
chr4	8914800	8915200	1.98649
chr13	95339500	95339900	1.98621
chr9	98947700	98948200	1.98595
chr16	54098000	54098400	1.9844
chr1	57300800	57301400	1.98427
chrX	35211900	35212500	1.98355
chr11	56904800	56905400	1.98294
chr5	102615800	102616300	1.9816
chr10	50297300	50297900	1.98043
chr5	111657100	111657800	1.97968
chr4	79286500	79287000	1.97902
chr15	98041000	98041500	1.9788
chr5	4781800	4782200	1.97693
chr16	44079200	44079600	1.97556
chr1	53368700	53369100	1.97459
chr5	8692100	8692600	1.97451
chr10	84682300	84682700	1.97332
chr5	66591400	66591800	1.97163
chr17	48068900	48069600	1.97045
chr4	155061800	155062200	1.97
chr10	13408200	13408900	1.96994
chr1	148524200	148524800	1.96866
chr5	124457000	124457500	1.96583
chr3	14848700	14849200	1.96541
chr16	13597600	13598100	1.96349
chr6	77380600	77381100	1.96263
chr19	4430200	4430700	1.96239
chrX	139375300	139375800	1.96209
chr2	24366400	24366800	1.96173
chr4	61997500	61997900	1.9601
chr13	97786800	97787300	1.96008
chr3	153189500	153190000	1.95997
chr1	107661700	107662100	1.95638
chr17	47921200	47921700	1.95601
chr1	79243100	79243500	1.95534
chr14	34170800	34171200	1.9541
chr15	62884000	62884700	1.95335
chr5	90043400	90043900	1.95254
chr14	110500300	110500700	1.95191
chrX	12350200	12350700	1.95168
chr17	85087200	85087700	1.95058
chr7	124955900	124956300	1.95058
chr11	101823600	101824100	1.94823
chr2	21312800	21313200	1.94813
chr12	66486600	66487100	1.94754
chr10	58540700	58541100	1.94726
chr12	12534700	12535300	1.94669
chr7	24856000	24856400	1.94544
chrX	125693400	125693800	1.94516
chr12	41515100	41515600	1.94515
chr14	18401400	18401800	1.94514
chr6	54643300	54643700	1.94489
chr10	53256300	53256700	1.94234
chr16	90011900	90012500	1.94182
chr8	128046000	128046500	1.94169
chr5	108605400	108605800	1.94104
chr17	43386400	43386900	1.94055
chr16	20760100	20760700	1.93942
chr1	154121300	154121800	1.9394
chr3	106805400	106805800	1.93931
chr10	61080000	61080500	1.93926
chr11	37341200	37341700	1.93867
chr10	109335200	109335600	1.93694
chr14	67437300	67437800	1.93548
chr2	51749500	51750000	1.93499
chr1	28520900	28521300	1.93464
chr6	4483000	4483400	1.93443
chr9	85733100	85733600	1.93403
chr9	83222800	83223300	1.93343
chr11	48415700	48416200	1.93282
chr4	66969300	66970000	1.9315
chr16	52934000	52934400	1.93135
chr1	195226500	195226900	1.93069
chr18	82692600	82693100	1.93018
chr2	95715500	95716100	1.9298
chr3	145555300	145555900	1.92915
chr2	59801000	59801500	1.92581
chr5	14943400	14943900	1.92555
chr1	44445700	44446200	1.9255
chr6	17005500	17005900	1.92536
chr11	29395500	29396000	1.92509
chr9	42738500	42738900	1.92371
chr3	19881000	19881400	1.92209
chr14	77343800	77344300	1.92126
chr9	57338500	57339000	1.91943
chrX	102035200	102035800	1.91926
chr12	101143000	101143400	1.91924
chr1	152326800	152327200	1.9181
chr17	11991300	11991800	1.91792
chr7	102998300	102998900	1.91785
chr8	15731200	15731800	1.9176
chr18	39538000	39538500	1.91648
chr10	26216000	26216400	1.91512
chr5	76370000	76370400	1.91457
chr10	125622300	125622700	1.91386
chr6	145616200	145616600	1.91357
chr15	60460500	60460900	1.91343
chr3	159520000	159520500	1.91312
chr13	10636100	10636600	1.91111
chr3	71988400	71988900	1.91099
chr15	71382500	71382900	1.91088
chrX	63961500	63961900	1.91054
chr7	137963000	137963600	1.91036
chr16	38394200	38394700	1.9103
chr9	69125000	69125500	1.91025
chr17	5626300	5626800	1.91007
chr12	70611800	70612200	1.90994
chr13	60687600	60688000	1.90958
chr13	96815300	96815800	1.90752
chr14	100508900	100509400	1.90595
chr5	102378300	102378900	1.90504
chr3	77365300	77365700	1.90436
chr3	12241800	12242300	1.90212
chr4	107438900	107439300	1.89752
chr12	94700500	94700900	1.89719
chr4	65379100	65379500	1.89704
chr8	109940700	109941200	1.89667
chr12	59357400	59357800	1.89605
chr5	140939200	140939600	1.89572
chr12	85177300	85177700	1.89302
chr19	12837100	12837600	1.89028
chr16	9834200	9834800	1.88952
chr12	119266900	119267300	1.88923
chr17	24453400	24453800	1.88777
chr16	23032000	23032500	1.88762
chr3	40459300	40459900	1.88714
chr15	82514500	82515000	1.8863
chr3	139491500	139491900	1.88331
chr10	74841500	74842100	1.88283
chr17	53726400	53726900	1.88225
chr14	111182000	111182400	1.88207
chr2	163700500	163701000	1.88186
chrX	79387900	79388500	1.87896
chr16	26237200	26237700	1.87707
chr16	12310100	12310500	1.87559
chr5	97733800	97734400	1.87525
chr16	30745600	30746200	1.87469
chr13	36232100	36232600	1.87354
chr2	13184600	13185000	1.87351
chr11	7139000	7139600	1.87304
chr17	26748100	26748600	1.87216
chr9	105648200	105648700	1.87149
chr3	7650300	7650800	1.87118
chr3	148732900	148733300	1.86958
chr6	146476000	146476400	1.86782
chr10	70826500	70827000	1.86661
chr13	77505200	77505800	1.8662
chr4	149646900	149647300	1.86516
chr2	166330800	166331300	1.86509
chr2	51274700	51275200	1.86484
chr19	9748800	9749200	1.86428
chr1	33730000	33730400	1.86353
chr8	110541500	110542100	1.86326
chr7	73104200	73104700	1.86148
chr14	118329700	118330100	1.86025
chr14	61551300	61552000	1.85937
chr17	17449900	17450400	1.85825
chr15	90847700	90848200	1.85719
chr11	35111800	35112200	1.85696
chr10	98748200	98748600	1.85616
chr16	20803600	20804000	1.8552
chr1	175460900	175461300	1.85502
chr6	71536600	71537200	1.8547
chr14	59058100	59058500	1.85431
chr13	60466300	60466800	1.85412
chr13	42118400	42118800	1.85398
chr14	89100100	89100500	1.85359
chr1	34444100	34444600	1.85334
chr10	120753400	120754000	1.85334
chr18	9027300	9027700	1.85299
chr10	60490000	60490400	1.85242
chr14	61563600	61565400	1.85232
chr17	88717700	88718200	1.8519
chr1	20843000	20843500	1.85128
chr16	64989000	64989600	1.84967
chr6	148672700	148673200	1.84951
chr4	63803300	63803800	1.84795
chr4	124724800	124725500	1.84741
chr1	168856100	168856700	1.84689
chr13	40546300	40546800	1.84643
chr14	121231400	121232000	1.84564
chr12	87321000	87321400	1.84557
chr12	74891500	74891900	1.84502
chr15	61071700	61072200	1.84493
chr1	62766900	62767300	1.84335
chr12	19091600	19092200	1.84277
chr14	61571500	61572200	1.84256
chr3	65100900	65101400	1.84148
chr5	24121700	24122200	1.84043
chr12	75490300	75490800	1.83937
chr14	59128100	59128500	1.83765
chr7	144556300	144556700	1.8376
chr1	122931400	122931800	1.83728
chr3	136575200	136575600	1.83671
chr2	171690100	171690700	1.83626
chr16	30798000	30798400	1.836
chr15	54157800	54158200	1.83566
chr12	113512900	113513400	1.83485
chr17	66106400	66106800	1.83461
chr6	16127800	16128300	1.83454
chr19	18827900	18828400	1.83435
chr9	9263600	9264100	1.83265
chrX	154227800	154228300	1.83174
chr17	19853600	19854000	1.83167
chr5	145255100	145255500	1.83149
chr15	41891400	41891900	1.83143
chr12	55049700	55050100	1.83026
chr1	153878400	153878900	1.82959
chr7	126860500	126861000	1.82844
chr2	147569700	147570200	1.82777
chr17	17333100	17333500	1.82517
chr13	67231400	67231900	1.825
chr19	24827400	24828100	1.82476
chr17	41805900	41806500	1.82263
chr12	3972900	3973600	1.822
chr8	54874100	54874500	1.82191
chr17	54149800	54150200	1.82113
chr10	61191800	61192200	1.8207
chr11	61042100	61042500	1.82015
chr2	54719500	54719900	1.81791
chr8	44935300	44935700	1.81771
chrX	135586400	135586900	1.81729
chr6	146893500	146894000	1.81444
chr6	114044300	114044800	1.81272
chr13	112517200	112517800	1.81089
chr6	52388300	52388700	1.80952
chr2	58432500	58433100	1.80856
chr5	13974600	13975000	1.80775
chr16	57196800	57197200	1.80763
chr1	78533900	78534300	1.80727
chr11	99367600	99368100	1.80727
chr2	117477100	117477600	1.80605
chr13	45719000	45719700	1.80586
chr7	5647400	5647800	1.80529
chr1	157442500	157442900	1.80524
chr12	43236800	43237600	1.80485
chr6	59018600	59019000	1.80462
chr12	96253500	96254000	1.80407
chr1	32289500	32290000	1.80386
chr9	87358900	87359400	1.80366
chr8	10941000	10941400	1.80292
chr6	109929000	109929500	1.80285
chrX	70539100	70539700	1.80256
chr2	89518100	89518700	1.80229
chr10	44912300	44912800	1.80212
chr2	9162700	9163100	1.80133
chr13	52331500	52331900	1.8002
chr15	36112500	36113000	1.79996
chr3	87346300	87346900	1.79972
chr5	65383700	65384200	1.79919
chr1	182890200	182890600	1.79887
chr1	139252700	139253100	1.7987
chr13	7528500	7529100	1.79801
chr16	53964800	53965200	1.79758
chr7	71421700	71422300	1.79674
chr3	83128500	83129000	1.79616
chr3	51494000	51494600	1.79611
chr10	119838800	119839300	1.79562
chr15	38114800	38115400	1.79513
chr19	14371800	14372300	1.79471
chr9	49471600	49472000	1.79271
chr9	49545100	49545500	1.79255
chr18	50138200	50138700	1.79241
chr18	56636600	56637100	1.79208
chr14	61570000	61570600	1.79074
chr3	78242700	78243200	1.79001
chr13	117138400	117138900	1.78957
chr17	68338400	68338800	1.78951
chr19	12617600	12618100	1.78945
chr13	96089300	96089900	1.78937
chr14	26994600	26995100	1.78908
chr17	49885900	49886300	1.78868
chr18	34280500	34281000	1.78838
chr19	21907900	21908400	1.788
chr19	17765900	17766500	1.78785
chrX	163477400	163477900	1.78777
chr3	100068800	100069400	1.78735
chr17	67099900	67100500	1.78687
chr7	5950100	5950500	1.78686
chr19	10015400	10015900	1.78654
chr12	53227500	53228000	1.78639
chr2	156389300	156389800	1.78594
chr7	128373300	128373800	1.78518
chr6	137468300	137468900	1.78511
chr2	179393800	179394300	1.78475
chr2	116746300	116746800	1.7835
chr8	102433500	102433900	1.78337
chr3	31342500	31342900	1.78329
chr1	26650400	26650800	1.78242
chr3	130163600	130164000	1.78187
chr2	166423800	166424300	1.78168
chr2	30762000	30762500	1.78144
chr2	11193900	11194500	1.78099
chr8	91848700	91849300	1.78085
chr10	65301800	65302300	1.78053
chr10	95923100	95923700	1.77881
chr8	78904100	78904500	1.77868
chr16	3393800	3394200	1.77862
chr7	103284900	103285400	1.77852
chr15	76867800	76868400	1.77796
chr5	26575000	26575600	1.77776
chr19	42127700	42128100	1.77761
chrX	117594500	117594900	1.77683
chr1	108299600	108300200	1.7763
chr11	113693800	113694200	1.77613
chr10	10380300	10380800	1.77504
chr4	54588500	54589000	1.77475
chr13	39691200	39691600	1.77459
chr2	72095500	72096000	1.77289
chr18	20113700	20114200	1.77286
chr5	132187400	132187900	1.77241
chr11	92781000	92781700	1.77225
chr14	61612200	61612800	1.77153
chr10	65690800	65691400	1.77091
chr18	66291800	66292300	1.77077
chr3	83103800	83104200	1.76978
chr13	12712100	12712500	1.76938
chr17	13596500	13596900	1.76786
chr3	121912800	121913600	1.76748
chr13	46846000	46846500	1.76677
chr9	60696500	60697000	1.76674
chr1	148901600	148902200	1.76545
chr4	143459700	143460200	1.76533
chr3	6241700	6242100	1.76498
chr18	73930900	73931400	1.76347
chr18	83465600	83466000	1.76196
chr7	124137200	124137700	1.76188
chr1	139824400	139825000	1.76138
chr2	168697400	168697800	1.76008
chr3	31299000	31299400	1.75996
chr9	25399800	25400300	1.75812
chr1	25632800	25633300	1.7579
chr2	37698100	37698600	1.75628
chr13	46442500	46442900	1.75626
chr3	54794000	54794400	1.75595
chr5	135574200	135574600	1.75547
chr13	84057600	84058000	1.75525
chr17	71069300	71069700	1.7551
chr2	177969800	177970200	1.7549
chr7	116085000	116085500	1.75486
chr17	13318000	13318400	1.75459
chr16	75439000	75439400	1.75445
chr7	29142900	29143600	1.75444
chr17	11623900	11624400	1.75334
chr3	50846300	50846700	1.75318
chr1	141279900	141280300	1.75257
chr4	10540500	10540900	1.75245
chr7	141282500	141282900	1.75199
chr11	33256800	33257300	1.75178
chr2	176889400	176889800	1.75172
chr3	35893000	35893500	1.75126
chr4	46875900	46876600	1.75074
chr4	59328500	59328900	1.75068
chr6	47131200	47131700	1.7501
chr9	56218500	56218900	1.74972
chrX	73698100	73698600	1.74942
chr17	36823500	36824000	1.74919
chr17	51533200	51533700	1.74907
chr5	41836800	41837200	1.74894
chr7	77411900	77412400	1.74775
chr18	82907400	82907800	1.74773
chr2	163705400	163705900	1.74714
chr15	85007900	85008500	1.74648
chr13	56960500	56961100	1.74613
chr1	40643600	40644100	1.74553
chr17	10776200	10776700	1.74503
chr18	23838300	23838700	1.7446
chr8	89198400	89198800	1.74385
chr10	33675400	33676000	1.74296
chr3	97184700	97185100	1.74273
chr15	93786400	93786800	1.74268
chr2	166767700	166768200	1.74249
chr15	100639100	100639500	1.74238
chr15	65048100	65048500	1.7417
chr2	113225700	113226100	1.74169
chr14	61555100	61555800	1.74085
chr9	10788900	10789300	1.74074
chr17	49732500	49733000	1.74065
chr2	119176200	119176600	1.74059
chr17	13837000	13837600	1.74024
chr4	144919600	144920000	1.74016
chr14	62612300	62613000	1.74012
chr19	23589900	23590300	1.73984
chr12	78103900	78104400	1.73965
chr2	117693100	117693600	1.73906
chr2	7047600	7048200	1.7389
chr8	63865400	63865900	1.7386
chr8	77613400	77613800	1.73814
chr14	118068400	118068800	1.73745
chr6	128723000	128723500	1.7374
chr1	26739100	26739600	1.73709
chrX	48283200	48283700	1.73701
chr10	82535800	82536400	1.737
chrX	70441700	70442100	1.73565
chr4	142338200	142338800	1.73563
chr17	79507900	79508500	1.73543
chr7	71330000	71330500	1.73455
chr3	152370300	152370800	1.73379
chr19	3910100	3910500	1.73303
chr18	58243000	58243400	1.73265
chr10	66840700	66841100	1.73225
chr11	36907200	36907600	1.73187
chr11	107599100	107599500	1.73177
chr8	16822600	16823000	1.73122
chr2	174865000	174865400	1.73004
chrX	70508200	70508600	1.73001
chr2	6479200	6479700	1.72965
chr10	129859400	129859900	1.72953
chr6	48839400	48839900	1.72865
chrX	7679400	7679800	1.72803
chr4	152107400	152108000	1.72778
chr7	118040800	118041200	1.72776
chr12	67763400	67763900	1.72749
chr9	28726600	28727000	1.72746
chr6	64932300	64932700	1.72728
chr19	52475200	52475600	1.72692
chr19	22419600	22420100	1.72632
chr5	93771800	93772200	1.72622
chr15	7300600	7301000	1.7252
chr19	12220000	12220400	1.72513
chr18	47157200	47158100	1.72442
chr7	84294400	84294800	1.72428
chr7	121823000	121823400	1.72322
chr4	32655900	32656300	1.72309
chr14	38084700	38085100	1.7228
chr8	100577900	100578300	1.72279
chr4	94975200	94975700	1.72218
chr14	37058300	37058700	1.72205
chr10	126589800	126590300	1.72189
chr14	33487800	33488500	1.72103
chr19	24527800	24528300	1.721
chr12	3903400	3903800	1.72089
chr2	124206200	124206600	1.72066
chr5	112918700	112919100	1.72024
chr7	80565600	80566000	1.72011
chr19	56676200	56676600	1.7198
chr1	179627200	179627700	1.71936
chr7	146294000	146294400	1.71936
chr4	23335200	23335700	1.71848
chr13	64016900	64017300	1.71803
chr15	96540500	96540900	1.71779
chr14	117481200	117481700	1.71745
chr14	53881900	53882300	1.7169
chr12	80805200	80805600	1.71648
chr7	88833900	88834400	1.71608
chr4	44917000	44917400	1.71601
chr13	112009500	112009900	1.71564
chrX	105982300	105982700	1.7156
chr2	17733900	17734300	1.71546
chr8	42569100	42569500	1.71529
chr8	12481700	12482200	1.71511
chrX	81307900	81308300	1.71482
chr5	97231300	97231800	1.71443
chr5	113405800	113406400	1.71431
chr14	35999400	35999900	1.71394
chr8	123495500	123496200	1.71384
chr12	25408600	25409000	1.71347
chrX	8367300	8367700	1.71287
chr6	106755000	106755500	1.7125
chr1	13851200	13851900	1.7123
chr6	29237900	29238400	1.71222
chr4	107514900	107515300	1.71188
chrX	57808300	57808800	1.71185
chr3	25423300	25423700	1.71173
chr5	106807000	106807600	1.71138
chr6	90157600	90158100	1.71129
chr5	86213700	86214100	1.71111
chr10	81088700	81089100	1.71084
chr6	110781100	110781500	1.71081
chr2	72571300	72571900	1.70959
chr13	51086700	51087100	1.7092
chr2	176638300	176638800	1.70782
chr18	3601100	3601600	1.70725
chr18	3044400	3044900	1.70679
chr12	51069000	51069600	1.70657
chrX	152192200	152192700	1.70564
chrX	39674500	39674900	1.70544
chr12	73945100	73945700	1.70542
chr12	101543300	101543800	1.70425
chr2	105448200	105448700	1.70317
chr10	103517600	103518000	1.70282
chr4	9017200	9017600	1.7018
chr11	18820700	18821100	1.70146
chr11	7080400	7080800	1.70112
chr17	9616100	9616700	1.70096
chr14	79406900	79407400	1.7009
chr8	13503900	13504400	1.70056
chr8	94473200	94473700	1.70032
chr12	38386000	38386500	1.70031
chr11	12330300	12330700	1.70004
chr7	88625700	88626200	1.6992
chr14	15001500	15002100	1.69917
chr8	89918300	89918700	1.69912
chr2	163934200	163934700	1.69898
chr2	92518500	92519000	1.69894
chr5	20255400	20255800	1.69861
chr17	7583100	7583500	1.69822
chr8	37079100	37079600	1.69772
chr8	74492300	74492900	1.69771
chr15	58025900	58026400	1.69736
chr5	44128300	44128700	1.69693
chr15	29447100	29447600	1.69663
chr3	50523000	50523500	1.69663
chr9	121803600	121804000	1.69561
chr10	40271600	40272000	1.6952
chr4	22228900	22229400	1.69393
chr5	75293300	75293900	1.69337
chr1	46855300	46855800	1.69332
chr6	18240800	18241400	1.69286
chr2	96920200	96920600	1.69272
chrX	70392600	70393200	1.69271
chrX	128946000	128946400	1.69266
chr13	5155400	5155800	1.69247
chr4	14028400	14028800	1.69235
chr7	117595900	117596300	1.69219
chr14	61573100	61573600	1.69218
chr6	88724600	88725100	1.69183
chr1	33736900	33737300	1.69176
chr4	147352500	147353100	1.69131
chr9	55954200	55954700	1.6908
chr5	75751400	75751900	1.69013
chrX	153593300	153593800	1.68938
chr15	82526100	82526600	1.68884
chr4	102432100	102432600	1.68881
chr2	148361500	148361900	1.68867
chr7	6838100	6838500	1.68803
chr3	96829000	96829700	1.68776
chr13	54882000	54882400	1.6872
chr1	172400700	172401100	1.68704
chr11	86421400	86421800	1.68686
chr11	102791900	102792300	1.68658
chr13	73566900	73567400	1.6861
chr2	106412200	106412600	1.68563
chr5	94795600	94796000	1.6848
chr17	51415400	51415800	1.68456
chr5	111970200	111970600	1.68456
chr17	51418100	51418600	1.68433
chr9	18238000	18238600	1.68427
chr7	65501900	65502300	1.68391
chr4	11490900	11491400	1.68357
chr10	40775300	40775900	1.68216
chr1	73112000	73112400	1.68179
chr9	33522800	33523300	1.68149
chr18	68991300	68991800	1.68085
chr8	40669500	40669900	1.68073
chr1	20293100	20293500	1.68063
chr6	148527400	148527900	1.68005
chr19	45505500	45506000	1.67968
chr11	14798400	14798900	1.67956
chr17	14784800	14785200	1.67955
chr8	12265000	12265600	1.67802
chr8	63214800	63215300	1.67799
chr18	68221700	68222100	1.6776
chr18	55145300	55145800	1.67712
chr8	130052700	130053200	1.67707
chr9	22752300	22752800	1.67702
chr17	80258500	80258900	1.67698
chr19	9055400	9055900	1.6765
chr18	57599400	57599800	1.67639
chr12	112806900	112807400	1.67633
chrX	137874000	137874400	1.67596
chr5	113387200	113387600	1.67547
chr7	143751200	143751800	1.67545
chr3	90250400	90250800	1.67452
chr19	11395500	11395900	1.6745
chr16	81121100	81121500	1.67446
chr1	186648400	186649000	1.67417
chr12	20855600	20856000	1.67396
chr3	153212900	153213400	1.67351
chr12	31382400	31382800	1.67345
chr16	22800400	22800800	1.67322
chr2	10966400	10966900	1.67286
chr10	122819000	122819400	1.67246
chr17	81739100	81739500	1.67214
chr6	47146500	47147000	1.67188
chr6	144517400	144517900	1.67173
chr5	27052500	27052900	1.67154
chr19	33222900	33223300	1.67145
chr9	49218700	49219100	1.67142
chr10	53838300	53838700	1.67129
chr10	4445700	4446200	1.67113
chr18	34116200	34116600	1.67057
chrX	101656900	101657600	1.67013
chr10	129825900	129826300	1.66997
chrX	71943700	71944100	1.6695
chr19	27426200	27426600	1.66949
chr9	20031300	20031800	1.66809
chr5	116475900	116476400	1.66774
chr6	17581600	17582000	1.66752
chr12	12503500	12504000	1.6671
chr17	4951100	4951500	1.66689
chr12	87222800	87223200	1.66678
chr9	64605800	64606300	1.66656
chr5	76338000	76338400	1.6661
chr2	116664500	116664900	1.66582
chr3	148310700	148311300	1.66568
chr5	114863500	114863900	1.66568
chr5	65015500	65016000	1.66553
chr5	76097500	76098100	1.66498
chr4	32607700	32608100	1.6628
chr9	44107500	44107900	1.6626
chr13	44239500	44240000	1.66255
chr8	106250100	106250500	1.66221
chr10	24991600	24992100	1.66176
chr5	134967600	134968000	1.66162
chrX	72078700	72079300	1.66154
chr13	99454300	99454800	1.66131
chr11	9972000	9972400	1.66119
chr19	20102300	20102700	1.66023
chr2	129067900	129068300	1.66021
chrX	90058600	90059100	1.66016
chr5	105104600	105105000	1.66008
chr11	77339200	77339700	1.65994
chr7	129464500	129464900	1.65958
chr5	106286700	106287800	1.65862
chr15	59454100	59454500	1.65808
chr7	60520900	60521400	1.65808
chr5	150475700	150476200	1.65797
chr5	51432800	51433300	1.65766
chrX	102297000	102297400	1.65685
chr16	70147900	70148300	1.65682
chr1	91949300	91949700	1.6563
chr5	128923900	128924400	1.65539
chr17	21673600	21674100	1.65529
chr14	53570900	53571300	1.65474
chr3	79152800	79153200	1.65457
chr1	170969100	170969600	1.65451
chr6	66847100	66847600	1.65412
chr14	61565900	61566900	1.6536
chr6	67357300	67357700	1.65313
chr3	145539100	145539500	1.65277
chr2	25654400	25654800	1.6527
chr16	71736200	71736700	1.65266
chr6	131361300	131361700	1.65253
chrX	70363900	70364600	1.65224
chr16	23517700	23518200	1.65161
chr7	138989900	138990400	1.65151
chr6	122779400	122780000	1.65072
chr12	78152300	78152700	1.65052
chr9	72660300	72660800	1.65036
chr2	104207500	104207900	1.65018
chr5	26450400	26451000	1.64988
chr7	7652600	7653000	1.64946
chr5	117208400	117209000	1.64939
chrX	144022400	144022800	1.64811
chr8	9005600	9006000	1.64793
chr14	23727200	23727600	1.64746
chr8	125906500	125907100	1.64673
chr6	77203400	77204000	1.64631
chr13	113042000	113042400	1.64556
chr1	91135800	91136400	1.64543
chr2	27889400	27890100	1.64534
chr17	90994900	90995600	1.6449
chr11	115767400	115767900	1.64462
chr17	48685500	48686000	1.64399
chr13	35487600	35488100	1.64395
chr14	52750500	52750900	1.64379
chr5	146104300	146104800	1.6429
chr11	53373200	53373700	1.64283
chr5	66974000	66974500	1.64212
chr2	157146600	157147100	1.6421
chr19	26191700	26192300	1.64199
chr19	34126000	34126400	1.64194
chr3	126164300	126164700	1.64167
chr18	46857800	46858400	1.64136
chr19	40446400	40446900	1.64123
chr5	105051700	105052100	1.64049
chr2	50741400	50741800	1.64045
chr7	71584800	71585200	1.63989
chr7	105908500	105909000	1.63987
chr18	76360200	76360700	1.63965
chr2	153099200	153099700	1.63818
chr7	99885900	99886400	1.63817
chr11	103171000	103171400	1.63789
chr11	38263000	38263400	1.63722
chr1	121795000	121795400	1.63713
chr5	101452800	101453300	1.63686
chr3	91331400	91331900	1.63657
chr13	45865000	45865400	1.63643
chr14	29911100	29911500	1.63611
chr14	102541900	102542500	1.63553
chr9	22834800	22835200	1.63478
chr16	29915400	29915900	1.63458
chr2	164261500	164262000	1.63456
chr16	75930100	75930600	1.63455
chr3	145840200	145840600	1.63422
chr3	48348200	48348600	1.63358
chr12	107448100	107448500	1.6329
chr4	140250900	140251400	1.63262
chr1	33437700	33438100	1.6321
chr17	65744700	65745300	1.63203
chr9	106136300	106136700	1.63201
chr14	39391100	39391600	1.63177
chr1	57861500	57861900	1.63158
chr1	8250300	8250900	1.6314
chr2	36219400	36219900	1.63131
chr1	64895600	64896100	1.63115
chr15	91533400	91534100	1.63106
chr2	31894100	31894600	1.63043
chr15	79956300	79956700	1.63025
chr1	103096400	103096900	1.63004
chr1	32500800	32501200	1.62998
chr2	20257600	20258100	1.62972
chrX	137201200	137201600	1.62969
chr5	90213500	90213900	1.62885
chr16	45583600	45584000	1.62876
chr4	149587300	149587800	1.62824
chr10	111497400	111497800	1.62822
chr5	75408600	75409200	1.62775
chr10	78676500	78677100	1.62767
chr18	12593900	12594400	1.62698
chr11	62791300	62791800	1.62697
chrX	99942200	99942600	1.62639
chr8	130162800	130163500	1.62602
chr2	129578500	129578900	1.6259
chr8	32368500	32368900	1.62558
chr6	40800100	40800600	1.62447
chr5	26663700	26664200	1.6243
chr10	109963700	109964100	1.62417
chr4	62531300	62531700	1.62389
chr1	23365600	23366100	1.62375
chr5	97792500	97792900	1.62339
chr2	169233300	169233800	1.62321
chr19	8172100	8172700	1.62305
chr12	78861100	78861500	1.62249
chr13	66882200	66882600	1.62218
chr6	59296200	59296700	1.62157
chr9	78375000	78375500	1.62153
chr9	84333900	84334300	1.62128
chr18	34050100	34050600	1.62118
chr7	89428700	89429100	1.62032
chr10	44238500	44239100	1.61996
chr19	27250900	27251400	1.61983
chrX	83873700	83874100	1.61906
chr19	8069700	8070300	1.61899
chr5	129732600	129733000	1.61758
chr12	105362100	105362500	1.61755
chr13	38525500	38526000	1.61755
chr18	13727700	13728200	1.61629
chr5	66935100	66935500	1.61593
chr15	95450600	95451300	1.61573
chrX	71894200	71894800	1.6155
chr12	57141000	57141500	1.61487
chr15	68436500	68437000	1.61438
chr18	28629100	28629500	1.61418
chr3	137758700	137759100	1.61403
chrX	138437300	138437700	1.61373
chr4	142555500	142555900	1.61334
chr14	68250900	68251500	1.6133
chr13	96218000	96218400	1.61325
chr1	194051900	194052300	1.61276
chr1	190005300	190005900	1.61219
chr12	120241300	120241700	1.61188
chr12	90280100	90280500	1.61178
chr16	77137600	77138000	1.61145
chr11	107179100	107179500	1.61126
chr6	72930900	72931500	1.6112
chr13	96165500	96166000	1.61109
chr8	120917900	120918400	1.61077
chr6	11428000	11428600	1.61051
chr10	40395800	40396200	1.61037
chr8	128915400	128915800	1.60988
chr6	125522400	125522800	1.60977
chr19	58670000	58670500	1.60968
chr1	131439100	131439600	1.60958
chr1	76035700	76036100	1.60874
chr16	90372900	90373400	1.60869
chr12	53439200	53439600	1.60843
chr2	95745300	95745700	1.6076
chr11	16978400	16978900	1.60753
chr17	81605800	81606300	1.60737
chr12	105855200	105855800	1.60699
chr8	22748800	22749300	1.60655
chr1	21334800	21335200	1.60631
chr1	95863300	95863900	1.60592
chr12	22256300	22256700	1.60572
chr2	14625400	14625900	1.60555
chrX	82105500	82106000	1.60503
chr13	103475700	103476200	1.60502
chr11	65679400	65680000	1.60434
chr12	8058700	8059100	1.60431
chr14	63003600	63004000	1.60425
chr16	22886400	22886800	1.60395
chr6	92777300	92777800	1.60296
chr2	51386700	51387100	1.60271
chr13	71401500	71401900	1.60243
chr12	18308300	18308700	1.60219
chr5	19899200	19899600	1.60197
chr7	6015500	6016100	1.60188
chr6	146146300	146146900	1.60088
chr2	13274000	13274400	1.59946
chr17	66640600	66641300	1.59916
chr5	117933400	117933800	1.59869
chr5	91827400	91828000	1.59853
chr8	36667400	36667800	1.59785
chr2	28958400	28958900	1.59781
chr6	144274400	144274800	1.59739
chr17	57938500	57939000	1.59736
chr17	67895300	67895700	1.5969
chr16	80732200	80732600	1.59685
chr6	82478700	82479100	1.59664
chr15	82987200	82987700	1.59634
chrX	56482000	56482400	1.59621
chr9	71790300	71790700	1.59608
chr4	60050900	60051500	1.59602
chr15	36343600	36344000	1.59553
chr18	6662500	6663000	1.59537
chr1	43789400	43789900	1.59532
chr14	86586100	86586500	1.59529
chr7	75874800	75875200	1.59491
chr8	50067000	50067400	1.59476
chr17	38489300	38489700	1.59453
chr14	90945800	90946300	1.59448
chr18	44594800	44595200	1.59428
chr19	55766800	55767300	1.59407
chr17	26666500	26666900	1.59387
chr2	4830000	4830400	1.59386
chr15	74856100	74856500	1.59343
chr3	101476900	101477300	1.59335
chr3	63033300	63033800	1.59324
chr12	52444200	52444700	1.59276
chr13	20900200	20900600	1.59238
chr5	112971300	112971700	1.59221
chr6	146262500	146263100	1.59212
chr1	143204900	143205300	1.59182
chr11	33188200	33188600	1.59118
chr13	38322300	38322700	1.59106
chrX	150948900	150949400	1.59054
chr14	54019400	54019900	1.59029
chr6	125635000	125635500	1.59017
chr10	6186700	6187200	1.58913
chr12	12731900	12732300	1.58874
chr17	7054700	7055100	1.5886
chr9	83378700	83379200	1.58857
chr10	113444400	113444800	1.58852
chr6	95176500	95176900	1.5876
chr2	81180600	81181100	1.58723
chr5	139062100	139062500	1.58719
chr7	7510600	7511000	1.58709
chr8	22225200	22225600	1.58661
chr16	92624200	92624600	1.5866
chr9	80106300	80106700	1.58638
chr6	94890500	94891000	1.58634
chrX	17346500	17347000	1.58622
chrX	45563500	45564000	1.58605
chr1	181198100	181198800	1.58583
chr1	92478100	92478500	1.58544
chr7	130981300	130981700	1.58543
chr2	75058600	75059000	1.58513
chr6	146634100	146634500	1.58497
chr13	18634600	18635000	1.5849
chr19	33420900	33421300	1.58489
chr7	116970400	116970800	1.58466
chr14	24412100	24412500	1.58457
chr7	119543700	119544100	1.58403
chr16	10754600	10755000	1.58385
chr5	23562500	23563100	1.58376
chr9	95605800	95606200	1.58359
chr1	119166800	119167200	1.58342
chr10	29510200	29510800	1.5833
chr7	151870900	151871300	1.58305
chr6	30518100	30518500	1.58282
chr3	83502600	83503000	1.5823
chr8	10547800	10548400	1.58184
chr16	84213400	84213800	1.58169
chr6	113431000	113431400	1.58118
chr19	47428900	47429400	1.58068
chr1	64385300	64385700	1.58053
chr10	50203300	50203900	1.58024
chr6	39977000	39977400	1.58021
chr9	103572900	103573600	1.58006
chr19	38107400	38107900	1.57968
chr5	107303600	107304000	1.5795
chr5	94417100	94417500	1.57932
chr5	37391100	37391800	1.57912
chr5	76331100	76331600	1.57908
chr10	124509500	124510000	1.579
chr15	18980000	18980500	1.579
chr9	48492300	48492700	1.57865
chr17	48296900	48297400	1.57845
chr13	108533900	108534400	1.57803
chr15	19935600	19936000	1.57766
chr2	128052300	128052700	1.57764
chr16	12110300	12110900	1.57762
chr5	13229400	13230000	1.57647
chr8	53664100	53664500	1.57618
chr3	50192200	50192600	1.57609
chr1	14459500	14459900	1.57603
chr2	181104800	181105300	1.57593
chr1	58799200	58799700	1.57555
chr6	140484100	140484500	1.57542
chr10	66327300	66327700	1.57491
chr5	146357700	146358100	1.57467
chr10	20835000	20835500	1.57447
chr19	8368200	8368800	1.57442
chr14	85556200	85556600	1.57374
chr13	52179100	52179500	1.57372
chr14	109037600	109038000	1.57347
chr5	141844700	141845100	1.57325
chr14	21711100	21711500	1.57283
chr10	61545300	61545700	1.57273
chr10	42680100	42680500	1.57268
chr9	116038000	116038400	1.57248
chr17	58958300	58958700	1.57176
chr12	40468000	40468400	1.57148
chr8	97280300	97280700	1.57118
chrX	37746000	37746400	1.57117
chr13	82887700	82888200	1.57101
chr14	67185400	67185800	1.57095
chr2	118189400	118189900	1.57091
chr13	60599000	60599400	1.57087
chr8	8142500	8143000	1.57067
chr19	49986300	49986700	1.57056
chr10	23335000	23335400	1.56968
chr15	5277000	5277500	1.56942
chr1	131221000	131221600	1.56927
chrX	123157400	123157900	1.56896
chr17	58913100	58913500	1.56895
chr16	72788100	72788600	1.56859
chr10	86577000	86577500	1.56831
chr12	52242100	52242500	1.56826
chr10	67036400	67036900	1.56823
chr7	68972700	68973100	1.56771
chr6	111777300	111777700	1.56754
chr10	46385100	46385700	1.56655
chr2	139613700	139614100	1.56579
chr7	8943500	8943900	1.56556
chr5	90676000	90676500	1.56552
chr2	169761800	169762200	1.56551
chr4	32553000	32553400	1.56523
chrX	70506100	70506500	1.56511
chr13	63214400	63214900	1.56504
chr19	33194800	33195200	1.56493
chr18	55855200	55855600	1.56485
chr15	71943600	71944100	1.56452
chr8	35686900	35687400	1.56411
chr9	123742300	123742800	1.56406
chr11	33259300	33259700	1.56383
chr16	71830900	71831300	1.56381
chr12	24044100	24044500	1.56371
chr18	55229700	55230200	1.56364
chr12	76902300	76902700	1.56311
chr4	72238600	72239000	1.56242
chr3	58116700	58117100	1.56239
chr12	71426800	71427200	1.56203
chr10	59242400	59242800	1.56186
chr5	128902800	128903300	1.5618
chr5	126566100	126566600	1.56154
chr5	65613300	65613700	1.56102
chr1	188409500	188409900	1.56081
chr1	40174700	40175300	1.5606
chr7	119039700	119040200	1.56049
chr8	92429500	92429900	1.56011
chrX	159846000	159846500	1.56006
chr16	44778700	44779200	1.55978
chr14	76703600	76704000	1.55936
chr1	185964500	185964900	1.55907
chrX	58672600	58673000	1.55883
chr1	186113600	186114200	1.55845
chr4	40823900	40824400	1.55752
chr12	107982400	107982800	1.55737
chr3	51339800	51340300	1.55734
chr15	76351000	76351500	1.55719
chr16	45369500	45370000	1.55678
chr18	70778400	70778800	1.55654
chr8	78073900	78074500	1.55652
chr8	125375500	125376100	1.55649
chr7	5357900	5358300	1.55646
chr11	67559800	67560200	1.55634
chr7	136710000	136710400	1.55617
chr6	98369100	98369500	1.55566
chr10	62887600	62888000	1.55543
chr14	67027700	67028100	1.55518
chr6	34331400	34331800	1.55465
chr17	78920700	78921200	1.5546
chr5	7000500	7001000	1.55455
chr3	97096100	97096600	1.55387
chr10	82360200	82360600	1.55376
chr17	88594800	88595200	1.55239
chr12	8405100	8405600	1.55151
chr9	24748200	24748800	1.55118
chr10	76969600	76970200	1.55106
chr12	47698200	47698600	1.55023
chr7	123378500	123378900	1.55021
chr2	82247900	82248300	1.55019
chr9	22653400	22653900	1.55019
chr9	77263100	77263500	1.54996
chr18	68956000	68956600	1.54992
chr1	94665600	94666500	1.54989
chr18	78674900	78675300	1.54978
chrX	7383200	7383600	1.54959
chr13	5311200	5311600	1.54955
chr18	30556100	30556600	1.54921
chr4	32170500	32171100	1.54906
chr4	89571200	89571600	1.54886
chr9	32822200	32822600	1.54882
chr9	65409700	65410300	1.54876
chr3	14169700	14170100	1.54835
chr8	83748600	83749100	1.54834
chr13	107528200	107528900	1.54821
chr16	81218800	81219200	1.54796
chr4	57502700	57503100	1.54789
chr3	124775500	124776000	1.54737
chr11	65795700	65796100	1.54682
chr15	61694100	61694500	1.54665
chr5	119665600	119666000	1.54615
chr9	99532900	99533300	1.54612
chr7	149003400	149003800	1.54585
chr1	192878800	192879200	1.54541
chr2	84256600	84257000	1.54517
chr5	98982300	98982700	1.54482
chr12	99665300	99665800	1.54475
chr9	6668000	6668500	1.54445
chr2	144052000	144052400	1.54431
chr10	3920100	3920500	1.54429
chr1	14646800	14647300	1.54411
chr3	107632500	107633000	1.54411
chr11	6356200	6356600	1.54309
chr9	54146000	54146400	1.54299
chr4	28720800	28721200	1.54268
chrX	49900100	49900800	1.54226
chr10	82385500	82385900	1.54224
chr2	155915400	155915900	1.54201
chrX	48934800	48935400	1.54125
chr15	11178400	11178800	1.54092
chr5	149777200	149777800	1.5408
chr3	9946300	9946800	1.54041
chr3	5189200	5189600	1.54029
chr3	113462500	113462900	1.53977
chr8	66835800	66836200	1.53948
chr1	95794200	95794800	1.53947
chr3	115822100	115822700	1.5392
chr19	36872500	36872900	1.53917
chr1	194247500	194247900	1.53832
chr2	104127000	104127500	1.53799
chr7	9191000	9191400	1.53775
chr19	31768900	31769300	1.53723
chr17	77879200	77879700	1.53721
chr11	63432300	63432700	1.53714
chr10	28380900	28381400	1.53703
chr6	135779700	135780200	1.537
chr3	58064400	58064800	1.53698
chr3	40308000	40308400	1.5365
chr13	16853100	16853500	1.53589
chr4	24707200	24707700	1.53556
chr16	22782900	22783300	1.53546
chr3	109164700	109165200	1.53546
chr10	111020900	111021400	1.53475
chr15	71646600	71647100	1.53474
chrX	35417500	35417900	1.53469
chr10	14140300	14140700	1.53466
chr6	121425700	121426200	1.53464
chr3	152797500	152797900	1.53459
chr14	107379900	107380400	1.53452
chr2	167571700	167572100	1.53434
chr1	121883100	121883500	1.53386
chr2	154223900	154224400	1.53373
chr15	12295700	12296100	1.53356
chr9	115226200	115226600	1.53355
chr7	66892900	66893300	1.53336
chr5	126759000	126759400	1.53285
chr15	102976100	102976500	1.53276
chr3	40976700	40977200	1.53252
chr6	71551400	71551900	1.53208
chr2	178998700	178999200	1.53205
chr5	124057200	124057600	1.53197
chr6	34601300	34601700	1.5319
chr17	10349100	10349600	1.53184
chr2	117822000	117822500	1.53147
chr2	165262900	165263300	1.53134
chr3	27249900	27250500	1.531
chr11	75228600	75229000	1.53089
chr10	27312700	27313200	1.53061
chr12	42041500	42041900	1.53047
chr11	36082300	36082700	1.52972
chr16	28311400	28311900	1.52921
chr16	78632700	78633100	1.52905
chr5	147439900	147440600	1.52882
chr13	55996700	55997100	1.52877
chr19	15721700	15722200	1.52779
chr11	117010600	117011100	1.52756
chr14	26115400	26115800	1.52753
chr5	9428700	9429100	1.52744
chr19	28733100	28733500	1.52718
chr16	20862000	20862400	1.52692
chr8	93901200	93901600	1.52687
chr1	94111700	94112200	1.52676
chr1	95797700	95798100	1.52634
chr6	91593100	91593500	1.52633
chr2	87933900	87934300	1.52605
chr1	42024000	42024400	1.526
chr13	23192200	23192600	1.526
chr11	55877300	55877700	1.52598
chr12	79850400	79850900	1.5245
chr10	116645100	116645500	1.52433
chr12	5556600	5557100	1.5243
chr18	47559500	47559900	1.52415
chr4	81620600	81621000	1.5234
chr8	50367700	50368200	1.52319
chr7	16390700	16391100	1.52283
chr1	123359400	123359800	1.52263
chr19	24794800	24795300	1.52245
chr6	50995000	50995400	1.52205
chr15	55201500	55202000	1.52203
chr15	58762000	58762400	1.5218
chr11	117851000	117851500	1.52155
chr5	146548000	146548500	1.52115
chr12	113617800	113618200	1.5211
chr3	65666600	65667100	1.5209
chr13	87371200	87371600	1.52086
chr10	13703500	13703900	1.52081
chr9	75757800	75758400	1.52076
chr4	151442200	151442700	1.52075
chr2	9207700	9208100	1.52068
chr11	4701800	4702400	1.52037
chr3	67752800	67753400	1.5203
chr7	100299900	100300400	1.5203
chr17	57940500	57940900	1.52023
chr8	123979500	123979900	1.52008
chr7	29703000	29703500	1.5198
chr9	5367500	5367900	1.5198
chr12	74452100	74452600	1.51978
chr18	50552100	50552500	1.51978
chr8	27760900	27761300	1.51953
chr10	109578400	109578800	1.51906
chr7	71441200	71441600	1.51902
chr15	99482100	99482600	1.51872
chr10	111317500	111317900	1.51869
chr3	121825700	121826100	1.51859
chr11	81846600	81847100	1.51846
chr19	7235600	7236100	1.51844
chr8	36029600	36030000	1.51844
chr1	178561000	178561600	1.51838
chr10	123575600	123576000	1.51824
chr7	133008800	133009200	1.51799
chr14	11299800	11300200	1.51789
chr14	120737200	120737600	1.51782
chr7	137981500	137981900	1.51774
chr18	78797800	78798300	1.51766
chr10	50485800	50486200	1.51758
chr15	8225900	8226300	1.51749
chr14	48632400	48632800	1.5172
chr12	117768000	117768500	1.51715
chr9	92990800	92991300	1.51685
chr13	17941700	17942100	1.51653
chrX	114003600	114004000	1.51634
chr12	29714300	29714700	1.51606
chr10	100727500	100727900	1.51581
chr12	20919700	20920100	1.51564
chr11	120090000	120090400	1.51561
chr14	116930700	116931300	1.51535
chr1	154534300	154534800	1.51528
chr11	71743900	71744500	1.51528
chr3	63527300	63527700	1.51526
chr10	16756900	16757400	1.51476
chr16	42677200	42677600	1.51465
chr18	74875100	74875500	1.51465
chr6	53539800	53540300	1.51464
chr11	105684600	105685100	1.51455
chr16	31312500	31312900	1.51434
chr3	50402600	50403200	1.51419
chr5	142815500	142816100	1.51411
chr5	27613400	27613800	1.51323
chr6	53024800	53025200	1.51317
chr5	122482700	122483200	1.51298
chrX	165616100	165616500	1.51197
chr6	112899300	112899700	1.51195
chr2	166317800	166318200	1.51191
chr3	91798700	91799200	1.51191
chr5	107018600	107019000	1.51174
chr3	148179300	148179800	1.51141
chr5	147588500	147589100	1.51139
chr10	44350400	44350800	1.51123
chr2	21014500	21015100	1.51043
chr16	25407400	25407800	1.50994
chr6	56321300	56321800	1.50987
chr4	24939100	24939500	1.50969
chr3	96176800	96177200	1.50967
chr11	104972400	104972800	1.50959
chr9	41323300	41323700	1.50925
chr5	14043100	14043700	1.50903
chr8	43088600	43089000	1.50876
chr6	16037400	16037800	1.50863
chr13	52636800	52637200	1.50836
chr5	32004500	32004900	1.50831
chr9	22757000	22757400	1.50828
chr10	67847300	67847800	1.50823
chr17	28957000	28957400	1.50819
chr10	97470000	97470500	1.50795
chr2	41536000	41536500	1.50795
chr15	35169700	35170100	1.50772
chr5	8909100	8909500	1.50772
chr1	159805200	159805600	1.50762
chr5	74361400	74361800	1.50757
chr7	76595100	76595600	1.50732
chr18	52476100	52476600	1.50728
chr10	74102300	74102700	1.50668
chr17	67602600	67603000	1.50663
chr10	106642300	106642700	1.50662
chr14	32241500	32241900	1.50638
chr12	33302000	33302400	1.50625
chr11	36844300	36844700	1.50538
chr1	59822200	59822600	1.50514
chr3	83407600	83408100	1.50513
chr6	73766900	73767400	1.50463
chr11	53844600	53845100	1.5045
chr2	49556800	49557200	1.50449
chr2	151582200	151582600	1.50438
chr11	8193400	8193800	1.50427
chr8	11308500	11309000	1.50417
chr11	118415700	118416200	1.50367
chr8	128461300	128461800	1.50353
chr11	57522100	57522600	1.50296
chr3	34820500	34821000	1.50264
chr1	84138200	84138600	1.50251
chr9	57968100	57968500	1.50199
chr2	5708000	5708400	1.50174
chr8	36476500	36476900	1.50142
chr10	11184800	11185300	1.50126
chr4	96545400	96545800	1.50118
chr5	20582200	20582600	1.50091
chr18	33652500	33653000	1.50078
chr7	111491600	111492100	1.50061
chr19	35202500	35203000	1.50051
chr2	25111800	25112200	1.50047
chr3	7047500	7047900	1.50012
chr1	168715700	168716200	1.49997
chr6	31834700	31835200	1.49951
chr11	23153600	23154000	1.49948
chr13	97495200	97495600	1.49939
chr10	52748200	52748600	1.49936
chr4	61936100	61936600	1.4991
chr5	50509800	50510200	1.49901
chr12	74816900	74817400	1.49897
chr3	23163300	23163700	1.4988
chr4	46944900	46945400	1.49859
chr10	3639700	3640100	1.49858
chr15	90301000	90301400	1.4985
chr11	51037500	51037900	1.49833
chr4	107005900	107006300	1.49811
chr1	75985000	75985400	1.498
chrX	74738300	74738700	1.49786
chr1	163496300	163496700	1.49774
chr16	72897300	72897800	1.49774
chr1	64091300	64091700	1.49769
chr10	76190900	76191400	1.49755
chr3	79197100	79197600	1.49753
chr7	124279000	124279600	1.49745
chrX	120214000	120214400	1.49745
chr14	103967300	103967900	1.49724
chr17	69880600	69881000	1.49694
chr5	13508400	13508900	1.49647
chr6	82198200	82198600	1.49645
chr1	14000900	14001300	1.49598
chr17	34818000	34818500	1.49567
chr13	57414200	57414600	1.49563
chr6	89379400	89379800	1.49544
chr18	80846800	80847400	1.4949
chrX	148966100	148966500	1.49483
chr2	72189300	72189700	1.49482
chr10	8700300	8700700	1.49472
chr18	74008600	74009000	1.49446
chr5	151900800	151901200	1.49445
chr4	68533100	68533500	1.49401
chr8	13668200	13668700	1.49366
chr8	8744200	8744700	1.49355
chr2	47611200	47611700	1.49349
chr5	4312700	4313100	1.49347
chr10	114080300	114080700	1.49315
chr10	44844800	44845200	1.49312
chr14	75741600	75742100	1.49302
chr14	48972300	48972800	1.49296
chr9	32501800	32502200	1.49283
chr9	87507800	87508300	1.49264
chr8	26029100	26029700	1.49227
chr15	10473700	10474100	1.49188
chr15	90904500	90904900	1.49176
chr5	152118900	152119400	1.49152
chr15	10594000	10594500	1.49124
chr18	12867600	12868000	1.49096
chr9	17947700	17948100	1.49093
chr4	144474000	144474500	1.49088
chr18	33826800	33827300	1.49056
chr17	31856400	31856900	1.49044
chr5	63814900	63815400	1.49037
chr2	173431200	173431800	1.49034
chr15	66249500	66250000	1.49028
chr18	3596200	3596700	1.49011
chr2	172623100	172623600	1.49011
chr11	9017600	9018200	1.48978
chr10	23635500	23635900	1.4896
chr6	49056900	49057300	1.48943
chr17	69891400	69891800	1.48922
chr2	175394000	175394500	1.4892
chr12	66547900	66548500	1.48886
chr19	49298100	49298500	1.48868
chr9	84238200	84238700	1.48856
chr7	144776600	144777000	1.48855
chr3	130069300	130069800	1.48844
chr11	121287000	121287400	1.48831
chr16	73754400	73754800	1.48823
chr4	45696000	45696600	1.4882
chr13	40010400	40010900	1.4881
chr16	33085800	33086200	1.48804
chr19	10538400	10538800	1.4878
chr18	11510800	11511400	1.48773
chr10	42161300	42161700	1.48746
chr13	20874800	20875200	1.48732
chr16	23522400	23522800	1.48726
chr10	44622400	44622900	1.48713
chrX	57100800	57101200	1.48709
chr4	100008100	100008500	1.48699
chr13	49967400	49967800	1.48695
chr2	118487900	118488400	1.48688
chr10	43663400	43664000	1.48676
chr16	97510200	97510600	1.48637
chr3	19514400	19514800	1.48633
chr7	90081200	90081600	1.48628
chr5	28229300	28229800	1.48583
chr17	59505500	59505900	1.48581
chrX	59565200	59565600	1.48563
chr19	41413800	41414200	1.4853
chr8	128214000	128214400	1.4853
chr16	86180800	86181300	1.48503
chr18	55306400	55306800	1.48497
chr3	84731300	84731700	1.48496
chr5	126594600	126595000	1.48481
chr4	137481000	137481400	1.48479
chr8	70403000	70403400	1.48459
chr3	68982300	68982700	1.48458
chr8	124447400	124447900	1.48457
chr5	54344300	54344800	1.48449
chr7	25969200	25969600	1.48404
chr10	22092900	22093400	1.48354
chr13	9238700	9239100	1.48331
chr2	128277100	128277500	1.48325
chr10	83324400	83324800	1.48323
chr14	29365100	29365600	1.48296
chr12	47808300	47809000	1.48285
chr14	61561500	61562700	1.48283
chr6	89024400	89024800	1.48282
chr7	28387900	28388300	1.48257
chr1	12981200	12981600	1.48251
chr8	47724600	47725000	1.48251
chr10	26969200	26969800	1.4825
chr17	84296600	84297200	1.48239
chr4	8032500	8032900	1.48194
chr10	91705800	91706200	1.48191
chr4	144005200	144005600	1.48143
chr4	130022000	130022500	1.48131
chr5	24265300	24265700	1.48131
chr9	16079200	16079600	1.48098
chr14	26855000	26855500	1.48086
chr19	27979300	27979700	1.48066
chr8	113304000	113304400	1.4799
chr9	60349900	60350300	1.47988
chr8	125546500	125546900	1.47975
chr16	81037000	81037400	1.47966
chr5	138052200	138052600	1.47956
chr2	167482200	167482600	1.47933
chr1	61198300	61198700	1.47926
chr12	55353100	55353500	1.47904
chr4	65613000	65613400	1.47899
chr12	112998500	112998900	1.47886
chr11	12093500	12093900	1.47857
chr5	81112300	81112900	1.47854
chr5	14030700	14031100	1.47818
chr1	24255700	24256300	1.47799
chr3	18637800	18638200	1.47728
chr15	99413800	99414200	1.47726
chr11	93299400	93299900	1.47723
chr11	121796100	121796600	1.47714
chr19	17363800	17364200	1.4771
chrX	38340200	38340600	1.47697
chr7	90823200	90823600	1.47668
chr19	42854200	42854600	1.47626
chr11	10950600	10951000	1.47613
chr2	177893600	177894100	1.47568
chrX	163329500	163329900	1.4756
chr4	123241300	123241700	1.47553
chr14	86831000	86831400	1.47504
chr16	41753000	41753400	1.47496
chrX	75762000	75762400	1.47488
chr2	60967500	60968000	1.47456
chr14	114410900	114411300	1.47443
chr4	145093700	145094100	1.47383
chr1	67651600	67652000	1.47372
chr10	122381900	122382300	1.47365
chr2	75527600	75528100	1.47361
chr12	96630700	96631100	1.47344
chr2	91812300	91812700	1.47312
chr5	22044900	22045300	1.47294
chr18	65737600	65738100	1.47293
chr10	115875200	115875800	1.47288
chr2	174407600	174408000	1.47281
chr3	107565100	107565500	1.47257
chr6	47333400	47333800	1.47246
chr10	18117300	18117900	1.47239
chr10	72514900	72515300	1.47211
chr3	57184600	57185000	1.47184
chr8	11830500	11830900	1.47158
chr19	21480400	21480800	1.47151
chr2	117374000	117374400	1.47143
chr14	29269600	29270000	1.4713
chr13	113404500	113404900	1.47102
chr5	140481400	140481800	1.47095
chr5	140913400	140913800	1.47094
chr5	124962900	124963400	1.47087
chr10	21392500	21392900	1.47077
chr3	125273500	125273900	1.47067
chr13	28984800	28985400	1.47041
chr10	61479500	61480000	1.47031
chr6	142340800	142341200	1.47025
chr14	61187100	61187600	1.46982
chr7	152313600	152314000	1.46967
chr10	59624900	59625300	1.46945
chr8	81180400	81180800	1.46904
chr5	10019700	10020300	1.46875
chr4	145133700	145134200	1.46873
chr17	80510700	80511200	1.46863
chr13	56078000	56078500	1.46834
chr17	69241800	69242200	1.46824
chr7	81236400	81236900	1.46818
chr14	36117900	36118400	1.46782
chr3	158113700	158114100	1.4673
chr7	137090600	137091000	1.46729
chr15	32086800	32087300	1.46725
chr14	62433900	62434300	1.4672
chr15	14347200	14347600	1.4672
chr2	15561600	15562000	1.46715
chr18	82691900	82692300	1.46713
chrX	96436900	96437600	1.46709
chr6	55786200	55786600	1.46667
chr1	59313400	59313800	1.46664
chr17	49442300	49442700	1.46612
chr19	55881100	55881500	1.46595
chr7	80121100	80121600	1.46582
chr2	25143900	25144300	1.4658
chr15	95106900	95107500	1.46577
chr14	59647500	59647900	1.46568
chr18	6960000	6960400	1.4656
chr18	24294800	24295200	1.46489
chr10	79797800	79798400	1.46486
chr14	84623100	84623600	1.46472
chr17	47538500	47539000	1.46444
chr6	103570900	103571400	1.4642
chr1	130138800	130139200	1.46416
chr13	99278200	99278600	1.46392
chr14	14173200	14173600	1.46372
chr11	49046300	49046800	1.4635
chr14	87615000	87615500	1.46347
chr11	51962500	51962900	1.4632
chr15	64352100	64352500	1.46314
chr8	77240000	77240400	1.46305
chr18	43083400	43083900	1.46293
chr1	113914500	113914900	1.46288
chr3	39378200	39378700	1.46283
chr11	115831500	115831900	1.46276
chrX	138860400	138860900	1.46273
chr8	19437700	19438100	1.46268
chr10	38928600	38929000	1.46247
chr13	36111600	36112100	1.462
chr2	124438200	124438700	1.46197
chr6	37260700	37261200	1.46165
chr7	16571400	16571800	1.46163
chr8	42048400	42048800	1.46106
chr12	104922000	104922400	1.46082
chr17	6248900	6249300	1.46067
chr19	31518600	31519000	1.46062
chr17	72436500	72436900	1.46059
chr8	81915200	81915600	1.46058
chr12	56567100	56567600	1.46056
chr15	72248200	72248700	1.46048
chr11	10645500	10645900	1.46047
chr5	101679300	101679700	1.46025
chr13	25961200	25961600	1.46006
chr2	37368800	37369200	1.45978
chr9	97039000	97039400	1.45922
chr5	13691300	13691700	1.45916
chr12	117914700	117915100	1.45871
chr15	78765000	78765400	1.4587
chr14	98903500	98904100	1.45866
chr9	52086100	52086500	1.45861
chr3	75378800	75379200	1.45858
chr5	112368900	112369400	1.45844
chr12	65716700	65717100	1.45816
chr12	28116600	28117100	1.45814
chr17	3597800	3598300	1.45788
chr10	8153800	8154300	1.45784
chr12	27733100	27733600	1.45759
chr2	178548400	178548900	1.45747
chr1	53111700	53112100	1.45724
chr10	46835800	46836300	1.45712
chr11	116908700	116909200	1.45683
chr19	30737000	30737400	1.45667
chr4	146057300	146057900	1.4565
chr7	119969700	119970100	1.45632
chr13	78585100	78585500	1.45628
chr1	12344500	12344900	1.45615
chr16	20445000	20445400	1.45615
chr15	88096700	88097200	1.45607
chr3	111970100	111970600	1.45597
chr13	39510000	39510500	1.4559
chr3	94870400	94870900	1.45565
chr12	77650400	77650900	1.45536
chr14	117819200	117819700	1.45533
chr10	49970000	49970400	1.45509
chr1	58708800	58709300	1.45506
chr7	20194800	20195200	1.45471
chr13	3781700	3782200	1.45468
chr2	113400100	113400600	1.45457
chr3	79491900	79492400	1.45447
chr1	174159400	174159800	1.45379
chr9	60352200	60352600	1.45374
chr13	26309000	26309400	1.45373
chr18	66747100	66747500	1.45355
chr1	55284100	55284500	1.45341
chr13	12336000	12336400	1.45338
chr17	87767900	87768300	1.45313
chrX	47034500	47034900	1.45313
chr5	81271400	81271800	1.45301
chrX	5012900	5013300	1.45295
chr15	78634000	78634500	1.45286
chr19	56157800	56158200	1.45277
chr10	20487500	20487900	1.45274
chr2	70273900	70274400	1.45236
chr2	111200800	111201300	1.45148
chr11	86383900	86384300	1.45129
chr3	49732700	49733200	1.45109
chr8	10051700	10052100	1.45107
chr11	19576800	19577200	1.45079
chr3	48616200	48616700	1.45075
chr12	111303300	111303800	1.45053
chr13	103417700	103418100	1.45048
chr13	113576100	113576700	1.45025
chr16	17855300	17855700	1.45009
chr9	16095500	16095900	1.44993
chr3	56759200	56759700	1.44979
chr2	179938100	179938500	1.44975
chr10	83828000	83828500	1.44968
chr14	121829200	121829600	1.44965
chr11	29665000	29665400	1.44957
chr2	43229200	43229800	1.44955
chr2	50826900	50827300	1.44929
chr8	123145700	123146100	1.44914
chr6	27647900	27648400	1.44909
chr3	68077300	68077700	1.44874
chr1	161052300	161052700	1.44856
chr1	82533100	82533500	1.44839
chr3	84573300	84573800	1.44839
chrX	75933400	75933900	1.44819
chr6	140823400	140823800	1.44789
chr7	88452700	88453100	1.44789
chr12	104579300	104579700	1.44786
chr13	13530700	13531100	1.44777
chr3	9149800	9150200	1.44745
chr13	54628500	54628900	1.44734
chr6	140227100	140227500	1.44727
chr9	105946300	105946700	1.44709
chr13	90936800	90937200	1.44707
chr10	5142200	5142600	1.44693
chr4	69737400	69737800	1.44637
chr2	4709200	4709600	1.44625
chr9	62308800	62309200	1.44625
chr14	47640400	47640800	1.44618
chr13	106713100	106713500	1.44583
chr10	18765700	18766400	1.44581
chr4	145702800	145703200	1.44581
chr12	96726700	96727100	1.4457
chr9	83499800	83500300	1.4457
chr4	44707300	44707700	1.44564
chr6	23119300	23119700	1.44526
chr4	98644800	98645400	1.44517
chr4	60384400	60384900	1.44516
chr6	106451900	106452300	1.44496
chr12	111396600	111397000	1.44484
chr4	96566300	96566700	1.4448
chrX	94379300	94379900	1.44478
chrX	45296400	45296800	1.44474
chr10	20129000	20129400	1.44472
chr9	83926500	83926900	1.44461
chr10	68854700	68855200	1.44455
chr13	44428200	44428600	1.44446
chrX	153260400	153260900	1.44436
chr11	64363000	64363400	1.44421
chr15	86033100	86033500	1.44346
chr19	61311900	61312300	1.44331
chr17	63867900	63868400	1.44267
chr5	74139000	74139400	1.44263
chr2	70959500	70959900	1.44262
chr8	130567300	130567700	1.44221
chr8	58047000	58047400	1.44214
chr7	88732400	88732900	1.44176
chr6	85392900	85393300	1.4416
chr3	56762900	56763500	1.44135
chr17	81136300	81136700	1.44128
chr1	172639200	172639700	1.44114
chr4	25294400	25294800	1.44097
chr6	14284600	14285000	1.44066
chr14	40545800	40546300	1.44034
chr12	82790900	82791400	1.44017
chr18	27579600	27580300	1.43958
chr10	104767700	104768100	1.43919
chr2	173949300	173949700	1.43905
chr16	89933900	89934300	1.43876
chr3	146318000	146318500	1.43813
chr12	103985900	103986400	1.43812
chr8	130325100	130325500	1.43803
chr4	108084500	108084900	1.438
chr4	128301100	128301500	1.43799
chr18	55237100	55237500	1.43791
chr9	106074200	106074700	1.43789
chr8	131569800	131570200	1.43749
chr7	30461600	30462000	1.4371
chr18	79679400	79679800	1.43686
chr8	98377400	98377800	1.43683
chr10	22918300	22918700	1.43657
chr19	54766500	54766900	1.43624
chr6	89300000	89300400	1.43619
chr17	14953000	14953500	1.43595
chr8	80814900	80815300	1.4359
chr4	94060900	94061300	1.43569
chr14	36923900	36924300	1.43529
chr8	37847900	37848300	1.4351
chr10	92300400	92300800	1.43509
chrX	86768700	86769200	1.43462
chr10	91790500	91790900	1.43448
chr16	30129500	30129900	1.43437
chr10	114537100	114537500	1.43431
chr3	119033400	119033800	1.43399
chr7	117455600	117456100	1.43386
chr9	38157400	38157800	1.43349
chr8	22730500	22730900	1.43348
chr3	135882700	135883100	1.43311
chr1	46420100	46420600	1.43288
chr14	45666300	45666700	1.43282
chr8	43348200	43348600	1.43259
chr4	119116800	119117300	1.43235
chr3	154115600	154116000	1.43189
chr4	54138600	54139000	1.43179
chr15	85338000	85338400	1.43139
chr6	143084300	143084700	1.43113
chr11	56075900	56076300	1.43088
chr7	111423300	111423800	1.43088
chr2	74833000	74833400	1.43077
chr13	26078100	26078500	1.43018
chr13	85289200	85289600	1.43007
chr5	68878800	68879200	1.42981
chr10	13680300	13680700	1.42969
chr14	73414000	73414500	1.42958
chr13	34801300	34801700	1.42937
chr2	22177800	22178300	1.42934
chr10	37322900	37323300	1.4292
chr4	71630300	71630700	1.42901
chr16	50061600	50062100	1.42883
chr8	46081900	46082400	1.42878
chr5	36261100	36261500	1.42875
chr5	112583900	112584300	1.42865
chr9	32261000	32261400	1.42827
chr18	74692400	74692800	1.42819
chr7	25819500	25819900	1.4281
chr3	130267800	130268200	1.42796
chr5	141417200	141417600	1.42735
chr1	161465600	161466100	1.42721
chr1	72639900	72640400	1.42717
chr3	20256300	20256700	1.42697
chr15	25326200	25326600	1.42688
chr10	33926100	33926500	1.42681
chr5	150595700	150596100	1.42674
chr4	92994100	92994600	1.42672
chr8	126594100	126594500	1.42643
chr1	25905300	25905700	1.42639
chrX	149169900	149170300	1.42631
chr16	45800400	45801000	1.42626
chr5	44340300	44340700	1.42615
chr2	90366800	90367200	1.42608
chr11	114888600	114889000	1.42607
chr19	55926300	55926700	1.42587
chr1	174063700	174064100	1.42561
chr15	8184200	8184600	1.42544
chr13	10047500	10047900	1.42523
chr12	72516600	72517000	1.42504
chr1	163410000	163410400	1.42503
chr9	104279400	104279800	1.42475
chr1	89173600	89174000	1.42415
chr2	160051000	160051600	1.42407
chr8	117423000	117423500	1.42395
chr15	3912700	3913100	1.42391
chr10	31491400	31491800	1.42377
chr1	137499600	137500000	1.42373
chr13	50930300	50930800	1.42338
chr19	41215500	41215900	1.42331
chr1	15560900	15561300	1.42275
chr17	44496300	44496700	1.42234
chr7	79217900	79218300	1.42206
chr3	97646000	97646400	1.42167
chr8	63851000	63851500	1.4214
chr10	88111400	88111900	1.42135
chr4	29046800	29047200	1.4212
chr17	80995300	80995700	1.42113
chr11	41639900	41640300	1.42097
chr8	12196200	12196600	1.42095
chr16	30006800	30007300	1.42093
chr11	52151300	52151800	1.42071
chr12	116461500	116461900	1.42049
chr8	13257900	13258400	1.42045
chr16	36024600	36025000	1.42007
chr3	52251800	52252200	1.42003
chr15	54093700	54094100	1.41974
chr2	117281200	117281600	1.41957
chr1	187717300	187717700	1.41955
chr9	15029700	15030200	1.41935
chr13	96171400	96171800	1.41929
chr12	28960800	28961200	1.41925
chr5	112764200	112764600	1.41896
chr7	6293100	6293600	1.41886
chr2	106309500	106309900	1.41883
chr1	12724400	12725000	1.41879
chr19	30391900	30392300	1.41858
chr13	4712100	4712500	1.41843
chr2	132274300	132274700	1.41835
chr4	122026000	122026500	1.41812
chr6	147492600	147493000	1.41791
chrX	98805300	98805700	1.41725
chr3	57237200	57237600	1.41724
chr12	118966200	118966600	1.41721
chr8	37314700	37315100	1.41714
[truncated: 5,362 more rows]

## Sheet: S9. kmer-SVM predictions hg19
chr	start	end	SVM score
chrX	25319100	25319500	3.21964
chr2	218691900	218692300	3.19893
chr8	38385600	38386000	3.09784
chr5	124465000	124465400	2.97864
chr2	237524600	237525000	2.95925
chr10	126008500	126008900	2.91639
chr15	27327400	27327800	2.90086
chr14	95012700	95013100	2.85605
chr13	40694900	40695300	2.84165
chr22	44845200	44845600	2.83847
chr2	210561900	210562300	2.80558
chr6	74847500	74847900	2.75048
chr1	64279400	64279800	2.74627
chr8	1968600	1969000	2.74162
chr3	182082800	182083200	2.72369
chrX	123364900	123365300	2.71307
chr14	100137700	100138100	2.70877
chr1	244094700	244095100	2.69003
chr18	59509300	59509700	2.67745
chr8	4011000	4011400	2.6737
chr18	53903000	53903400	2.66478
chr13	33902800	33903200	2.65794
chr16	86817400	86817800	2.65563
chr2	96307600	96308000	2.63528
chr15	29269500	29269900	2.63313
chr1	63607700	63608100	2.63258
chr14	96301600	96302000	2.62003
chr8	40862400	40862800	2.61385
chr4	154106100	154106500	2.59212
chr7	1439000	1439400	2.58577
chr8	122908800	122909200	2.57797
chr8	17298400	17298800	2.56926
chr17	48031000	48031400	2.56514
chr12	106339700	106340100	2.55424
chr16	64143300	64143700	2.55114
chr22	49919400	49919800	2.53595
chr6	17864400	17864800	2.53262
chr6	22198800	22199200	2.52519
chr2	96100200	96100600	2.51746
chr9	37144800	37145200	2.50817
chr1	86072900	86073300	2.50188
chr3	109244000	109244400	2.49897
chr11	124952900	124953300	2.49659
chr15	52709700	52710100	2.49645
chr9	133838000	133838400	2.48283
chr10	78435600	78436000	2.48023
chr12	125230600	125231000	2.47247
chr7	413200	413600	2.47128
chr6	165506800	165507200	2.46875
chr1	31010100	31010500	2.46826
chr6	67610000	67610400	2.44751
chr10	29948000	29948400	2.44344
chr12	99131800	99132200	2.44145
chr13	113453700	113454100	2.43154
chr19	30571300	30571700	2.42833
chr6	100650600	100651000	2.41883
chr18	11323400	11323800	2.41033
chr1	90071200	90071600	2.40483
chr2	121303700	121304100	2.40141
chr7	84695100	84695500	2.3976
chr4	84469600	84470000	2.39259
chr6	10375700	10376100	2.38994
chr11	112715200	112715600	2.38819
chr1	168058400	168058800	2.38189
chr19	869500	869900	2.37895
chr19	10056000	10056400	2.37798
chr4	127913300	127913700	2.3761
chr5	156642700	156643100	2.37399
chr8	101494500	101494900	2.3716
chr3	50337500	50337900	2.36964
chr14	94425600	94426000	2.35983
chr19	42556800	42557200	2.35981
chr8	80035300	80035700	2.35073
chr15	29864500	29864900	2.34957
chr1	38500600	38501000	2.34565
chr9	250000	250400	2.34467
chr8	37401300	37401700	2.34407
chr1	89078000	89078400	2.34161
chr7	115957300	115957700	2.34013
chr15	32224700	32225100	2.33773
chr1	232297700	232298100	2.3329
chr2	243012100	243012500	2.33067
chr15	67401500	67401900	2.3276
chr11	71505300	71505700	2.32691
chr4	118680000	118680400	2.32534
chr2	125733000	125733400	2.32237
chr9	127582900	127583300	2.32208
chr3	23988800	23989200	2.31528
chr2	10545700	10546100	2.31069
chr1	211909100	211909500	2.30852
chr5	167241800	167242200	2.30763
chrX	40280200	40280600	2.30419
chr9	130286700	130287100	2.30126
chr9	80120200	80120600	2.30052
chr15	99320200	99320600	2.29287
chr6	74290100	74290500	2.28962
chr11	103583400	103583800	2.28326
chr1	154794800	154795200	2.27839
chr12	89340200	89340600	2.27364
chr1	208232000	208232400	2.2701
chr11	71510700	71511100	2.26954
chr2	149569800	149570200	2.26798
chr11	62276200	62276600	2.26482
chr5	32042700	32043100	2.26478
chr8	131540500	131540900	2.25825
chr15	31705000	31705400	2.25706
chr11	110668100	110668500	2.2527
chr10	88617000	88617400	2.2485
chr8	82334700	82335100	2.2474
chr19	1169000	1169400	2.24564
chr1	242388200	242388600	2.24506
chr20	58937500	58937900	2.24497
chr3	127817900	127818300	2.23941
chr11	69064700	69065100	2.23394
chr1	112321200	112321600	2.23302
chr2	12309900	12310300	2.2301
chr1	175847700	175848100	2.22834
chr9	123681500	123681900	2.2268
chr5	14228400	14228800	2.22317
chr17	75598300	75598700	2.22073
chr21	37182800	37183200	2.22002
chr11	113914600	113915000	2.21462
chr1	16311100	16311500	2.21448
chrX	40051400	40051800	2.21412
chr10	1297200	1297600	2.21052
chr22	49317100	49317500	2.21048
chr2	14813600	14814000	2.21036
chr4	167719900	167720300	2.20936
chr6	11161500	11161900	2.20919
chr3	58651800	58652200	2.20757
chr2	161440300	161440700	2.20565
chr2	132256300	132256700	2.20565
chr18	45279800	45280200	2.20557
chr15	77574700	77575100	2.20551
chr1	192678700	192679100	2.20509
chr1	54362500	54362900	2.20077
chr6	230700	231100	2.19738
chr6	32131700	32132100	2.19654
chr16	49338200	49338600	2.19083
chr10	125690200	125690600	2.18993
chr17	66379500	66379900	2.18435
chr8	96872000	96872400	2.18101
chr10	94581900	94582300	2.18081
chr5	123932700	123933100	2.18052
chr8	119453900	119454300	2.179
chr4	175786600	175787000	2.17392
chrX	26579500	26579900	2.17355
chr7	11257600	11258000	2.17321
chr19	31282400	31282800	2.17149
chr21	46783900	46784300	2.17113
chr14	61614600	61615000	2.16312
chrX	128215900	128216300	2.16269
chr17	8695100	8695500	2.16197
chrX	16562900	16563300	2.16109
chr4	6610500	6610900	2.16092
chr3	16024200	16024600	2.15976
chr4	2080300	2080700	2.15726
chr22	27864300	27864700	2.15306
chr10	124104300	124104700	2.1529
chr12	64493100	64493500	2.15116
chr5	157946700	157947100	2.15006
chr17	14584600	14585000	2.14683
chr17	19708300	19708700	2.14282
chr10	134491100	134491500	2.14175
chr10	72424500	72424900	2.13896
chr1	223648100	223648500	2.13704
chr2	142794500	142794900	2.13665
chr1	185550100	185550500	2.12962
chr7	54148000	54148400	2.12957
chr18	48177700	48178100	2.12824
chr2	153201200	153201600	2.12609
chr19	55370800	55371200	2.12603
chr3	74092200	74092600	2.12387
chr8	97350300	97350700	2.12293
chr22	22973600	22974000	2.11804
chr19	2145700	2146100	2.11503
chr10	3510300	3510700	2.11429
chr13	61157200	61157600	2.11401
chr6	142619200	142619600	2.11196
chr8	139843200	139843600	2.11079
chr9	79292500	79292900	2.10839
chr5	10332300	10332700	2.10444
chr4	140872100	140872500	2.10262
chr10	134902900	134903300	2.10253
chrX	22501100	22501500	2.10104
chr20	595500	595900	2.10002
chr4	106058300	106058700	2.09992
chr16	87904200	87904600	2.09905
chr5	111898900	111899300	2.09902
chr2	235890000	235890400	2.09746
chr16	13401100	13401500	2.09686
chr16	19342200	19342600	2.09542
chr1	69279600	69280000	2.09465
chr1	19217200	19217600	2.09012
chr17	33152700	33153100	2.0888
chr11	130988100	130988500	2.0857
chr1	66930500	66930900	2.08469
chr10	106110900	106111300	2.08346
chr15	22268100	22268500	2.08254
chr6	51543900	51544300	2.08233
chr2	200168500	200168900	2.0807
chr13	48279400	48279800	2.08028
chr6	161903600	161904000	2.07955
chr16	86135200	86135600	2.07734
chr16	66656100	66656500	2.07633
chr8	8168100	8168500	2.07567
chr7	137871700	137872100	2.0745
chr9	108800300	108800700	2.07412
chr1	25521000	25521400	2.07279
chr6	151856600	151857000	2.07141
chr11	36171200	36171600	2.06887
chr10	54727800	54728200	2.06786
chr4	184531200	184531600	2.06569
chr3	95605400	95605800	2.06564
chr20	60831600	60832000	2.06434
chrX	19014200	19014600	2.06396
chr5	169949400	169949800	2.0636
chr6	33930100	33930500	2.0627
chr5	34410700	34411100	2.06184
chr6	88433000	88433400	2.06028
chr2	131525500	131525900	2.05523
chr16	74502900	74503300	2.05393
chr9	124646900	124647300	2.05386
chr10	95173000	95173400	2.05356
chr1	170514600	170515000	2.05166
chr2	132307900	132308300	2.04931
chr22	44226600	44227000	2.04857
chr11	12185700	12186100	2.04566
chr5	32953800	32954200	2.04478
chr5	169133900	169134300	2.04429
chr15	71685200	71685600	2.04417
chr1	2262100	2262500	2.04067
chr4	122706100	122706500	2.04057
chr10	33979500	33979900	2.0405
chr20	43321700	43322100	2.03954
chr7	10297000	10297400	2.03823
chr1	30447200	30447600	2.03766
chr9	117176200	117176600	2.03754
chr10	84741800	84742200	2.03733
chr1	6361400	6361800	2.03587
chr2	5689400	5689800	2.03332
chr22	37056200	37056600	2.03239
chr16	71850600	71851000	2.03189
chr21	32533400	32533800	2.03121
chr8	130648200	130648600	2.02899
chr9	111280300	111280700	2.0288
chr8	25783000	25783400	2.02774
chr12	22568800	22569200	2.02745
chr2	71725500	71725900	2.02721
chr5	141443300	141443700	2.02633
chr8	116430400	116430800	2.02598
chr9	94251700	94252100	2.02464
chr9	91092300	91092700	2.02108
chr14	59093200	59093600	2.02054
chr17	30430500	30430900	2.01966
chr17	32499500	32499900	2.01924
chr10	867200	867600	2.01781
chr17	52493700	52494100	2.01738
chr22	46773700	46774100	2.01733
chr8	1777500	1777900	2.01724
chr14	94299900	94300300	2.01559
chr2	20767100	20767500	2.01514
chr6	165281500	165281900	2.01456
chr20	15137600	15138000	2.01414
chr13	49203200	49203600	2.01365
chr7	71154100	71154500	2.0129
chr5	158183700	158184100	2.01213
chr16	13192300	13192700	2.0116
chr8	83960900	83961300	2.01155
chr20	26144600	26145000	2.01039
chr1	48083400	48083800	2.00908
chr6	163788100	163788500	2.00676
chr1	94217200	94217600	2.00506
chr13	114995100	114995500	2.00342
chr15	61093600	61094000	2.00291
chr2	234565000	234565400	2.0004
chr4	73295700	73296100	1.99997
chr20	24399300	24399700	1.99964
chrX	122609100	122609500	1.99875
chr7	51086900	51087300	1.99873
chr21	46412600	46413000	1.99743
chr8	6661100	6661500	1.99674
chr2	210695900	210696300	1.99519
chr11	131934800	131935200	1.99418
chr15	57778200	57778600	1.99309
chrX	43144200	43144600	1.99141
chr16	46607400	46607800	1.98999
chr18	51675200	51675600	1.9898
chr13	25017500	25017900	1.98885
chr4	188131100	188131500	1.98848
chr6	17169500	17169900	1.98717
chr6	6409800	6410200	1.98658
chr9	132090900	132091300	1.98637
chr9	127722500	127722900	1.98407
chr7	104541000	104541400	1.9822
chr2	212352500	212352900	1.9815
chr3	161362800	161363200	1.98121
chr11	12068800	12069200	1.98057
chr9	12046000	12046400	1.98054
chr2	173508400	173508800	1.98053
chr1	175166500	175166900	1.97917
chr1	74989600	74990000	1.9777
chr7	32627100	32627500	1.97757
chr16	34750900	34751300	1.97686
chr1	9203400	9203800	1.97668
chr8	130564300	130564700	1.97263
chr12	1583300	1583700	1.97259
chr3	111676000	111676400	1.97145
chr3	167027500	167027900	1.97095
chr11	67565700	67566100	1.9702
chrX	133738100	133738500	1.96922
chr10	88116200	88116600	1.96742
chr19	58084400	58084800	1.96622
chr13	60247500	60247900	1.96556
chr14	65483300	65483700	1.96415
chr18	56673700	56674100	1.96354
chr4	33229000	33229400	1.96275
chr4	176979600	176980000	1.96258
chr3	160555300	160555700	1.96035
chr5	113425100	113425500	1.9601
chr2	206522300	206522700	1.96009
chr18	3081500	3081900	1.95974
chr2	238110500	238110900	1.9596
chr16	89736800	89737200	1.95952
chr9	140358900	140359300	1.95898
chr17	54893200	54893600	1.95883
chr9	117211200	117211600	1.9583
chr21	40508600	40509000	1.95825
chr2	1720900	1721300	1.95511
chr9	7056900	7057300	1.95507
chr8	341900	342300	1.95456
chr20	38451800	38452200	1.95449
chr8	67447900	67448300	1.95327
chr5	96586800	96587200	1.95205
chr8	130697800	130698200	1.94967
chr2	170977200	170977600	1.94657
chr15	68891800	68892200	1.94548
chrX	17688500	17688900	1.9441
chr13	31317600	31318000	1.94258
chrX	9039300	9039700	1.94238
chr12	115903900	115904300	1.94135
chr10	101612100	101612500	1.93977
chr10	133840800	133841200	1.93948
chr7	25778700	25779100	1.939
chr8	579100	579500	1.93876
chr6	90788500	90788900	1.93811
chr7	3234500	3234900	1.93766
chr6	64992400	64992800	1.93707
chr19	40502300	40502700	1.93695
chr15	45748900	45749300	1.93553
chr6	138533100	138533500	1.93269
chr2	122884600	122885000	1.93118
chr7	39332700	39333100	1.92988
chr22	44405900	44406300	1.92947
chr9	127048200	127048600	1.92835
chr4	4881500	4881900	1.9278
chr7	68721900	68722300	1.92621
chr4	79555200	79555600	1.92494
chr2	192372100	192372500	1.92423
chr5	77245200	77245600	1.92353
chr2	75820300	75820700	1.92341
chr2	2476700	2477100	1.92214
chr8	105655100	105655500	1.9212
chr5	175582900	175583300	1.92117
chr4	27721400	27721800	1.92028
chr2	159732000	159732400	1.91995
chr13	87515800	87516200	1.91962
chr5	25401300	25401700	1.91598
chr22	25041900	25042300	1.91488
chr15	73931700	73932100	1.91344
chr12	76253600	76254000	1.91249
chr4	53113000	53113400	1.91202
chr12	89743500	89743900	1.91172
chr12	116933100	116933500	1.91048
chr11	36477300	36477700	1.9101
chr4	55607200	55607600	1.90872
chr4	170266600	170267000	1.90827
chr7	47728400	47728800	1.90793
chr6	112301400	112301800	1.90742
chr6	11625500	11625900	1.90543
chr18	72757200	72757600	1.9042
chr1	39206800	39207200	1.90388
chr15	71807900	71808300	1.90354
chr3	3435200	3435600	1.90257
chr2	54797200	54797600	1.90201
chr1	167105400	167105800	1.90038
chr13	46158200	46158600	1.89969
chr2	182842500	182842900	1.89914
chr22	19983500	19983900	1.89542
chr10	63797000	63797400	1.89532
chr5	13723700	13724100	1.89494
chr17	7258400	7258800	1.89451
chr7	71098600	71099000	1.8937
chr1	86667100	86667500	1.89307
chr2	220036000	220036400	1.89283
chr5	170921600	170922000	1.8912
chr12	123963300	123963700	1.89044
chr2	241931100	241931500	1.89014
chr2	85128700	85129100	1.89
chr7	6906100	6906500	1.88977
chr3	9436400	9436800	1.88967
chr12	67851500	67851900	1.88967
chr7	107999000	107999400	1.8869
chr17	2135300	2135700	1.88593
chrX	16603900	16604300	1.88558
chr19	582900	583300	1.88381
chr7	37087700	37088100	1.88353
chr11	114268100	114268500	1.88351
chr18	76767400	76767800	1.88304
chr7	29653200	29653600	1.88175
chr10	43769600	43770000	1.88123
chr5	151250200	151250600	1.88095
chr11	112271600	112272000	1.88014
chr7	92801300	92801700	1.87904
chr17	6252100	6252500	1.87854
chr9	85914300	85914700	1.87784
chr16	2537200	2537600	1.87719
chr4	150616200	150616600	1.87714
chr2	127292900	127293300	1.87606
chr2	90266700	90267100	1.8749
chr8	127595600	127596000	1.87465
chr4	6726200	6726600	1.87395
chr17	39584700	39585100	1.87385
chr7	97268500	97268900	1.87381
chr5	128400	128800	1.87305
chr14	93895400	93895800	1.87172
chr6	127064000	127064400	1.87107
chr9	82793100	82793500	1.86965
chr16	62167900	62168300	1.86951
chr6	117344100	117344500	1.86921
chr5	32234000	32234400	1.86883
chr9	8916700	8917100	1.86882
chr2	212633400	212633800	1.86831
chr9	107678300	107678700	1.86779
chr6	163616200	163616600	1.86723
chr2	66532900	66533300	1.86709
chr6	150618300	150618700	1.86668
chr5	166721800	166722200	1.86663
chr5	26644700	26645100	1.8666
chr14	81254300	81254700	1.86484
chr6	54456200	54456600	1.86447
chr21	38936800	38937200	1.86401
chr18	60807300	60807700	1.86363
chr6	151203300	151203700	1.86355
chr1	28764400	28764800	1.86219
chr5	10789200	10789600	1.8618
chr2	237856500	237856900	1.86169
chr10	91395100	91395500	1.86098
chr3	125423000	125423400	1.86072
chr15	70145900	70146300	1.86071
chr16	79471800	79472200	1.86029
chr4	159917900	159918300	1.85932
chr10	115718300	115718700	1.85901
chr20	55363500	55363900	1.85811
chr4	185901400	185901800	1.85761
chr10	125771000	125771400	1.85718
chr5	957100	957500	1.85717
chr15	67342000	67342400	1.85675
chr16	77458700	77459100	1.8564
chr8	1015200	1015600	1.85604
chr9	111149300	111149700	1.85592
chr11	65581600	65582000	1.85428
chr16	83466900	83467300	1.85412
chr2	160042000	160042400	1.851
chr9	100333100	100333500	1.85045
chr3	42225600	42226000	1.84919
chr1	101050500	101050900	1.8491
chr9	95485500	95485900	1.84779
chr17	75350900	75351300	1.84753
chr1	162660500	162660900	1.84728
chrX	72933000	72933400	1.84673
chr9	10265100	10265500	1.84657
chr14	58338200	58338600	1.84655
chr7	75821200	75821600	1.8463
chr5	143882600	143883000	1.84626
chr13	45780500	45780900	1.84578
chr10	30940600	30941000	1.84566
chr2	47494400	47494800	1.84563
chr10	81026400	81026800	1.84548
chr8	113170900	113171300	1.84531
chr15	73077800	73078200	1.84531
chr7	62859400	62859800	1.84445
chr9	111207100	111207500	1.84381
chrX	148329700	148330100	1.84378
chr9	20289400	20289800	1.84294
chr14	55144200	55144600	1.8422
chr10	44958900	44959300	1.84207
chr6	169083300	169083700	1.84145
chr18	56456700	56457100	1.84036
chr13	24722900	24723300	1.84018
chr1	246912200	246912600	1.83906
chr22	44317400	44317800	1.83874
chr17	31846900	31847300	1.83841
chr17	41811700	41812100	1.83807
chr4	9461800	9462200	1.83799
chr20	17862400	17862800	1.83791
chr16	30455700	30456100	1.83748
chr10	114104200	114104600	1.83666
chr1	92030600	92031000	1.83588
chr18	19576500	19576900	1.8354
chrX	125691200	125691600	1.83407
chr4	41614400	41614800	1.8331
chr19	3450900	3451300	1.83191
chr6	167893700	167894100	1.8318
chr7	22882200	22882600	1.83164
chr15	102095300	102095700	1.83132
chr15	41293600	41294000	1.83069
chr3	130411200	130411600	1.83032
chr16	81765300	81765700	1.82955
chr1	197976800	197977200	1.82924
chr9	16987100	16987500	1.82878
chr19	11978600	11979000	1.82857
chr16	24123000	24123400	1.8278
chr19	29374100	29374500	1.82772
chr1	22270700	22271100	1.8275
chr12	58704700	58705100	1.82729
chr2	3269600	3270000	1.82695
chr9	122084400	122084800	1.82644
chr3	122874300	122874700	1.82638
chr4	86602400	86602800	1.82636
chr8	8289700	8290100	1.82567
chr6	161459300	161459700	1.82463
chr9	139027400	139027800	1.82446
chr17	32050900	32051300	1.82398
chr8	52962100	52962500	1.82324
chr18	66464600	66465000	1.82289
chr5	114435400	114435800	1.82229
chr7	55198300	55198700	1.82187
chr4	39039100	39039500	1.82162
chr9	102192500	102192900	1.82097
chr4	26178000	26178400	1.8197
chr2	12154100	12154500	1.8189
chr22	46522400	46522800	1.81882
chr11	12051600	12052000	1.81764
chr20	38938400	38938800	1.81703
chr8	139175000	139175400	1.81686
chr4	122032100	122032500	1.81628
chr8	40969200	40969600	1.81602
chr17	59329600	59330000	1.81599
chrX	98729700	98730100	1.81365
chr12	25666000	25666400	1.81329
chr10	127021800	127022200	1.81328
chr2	120861600	120862000	1.81311
chr1	181103700	181104100	1.81266
chr10	57720700	57721100	1.81254
chr15	63270700	63271100	1.81251
chr21	22224100	22224500	1.81095
chr10	2094200	2094600	1.81069
chrX	12948100	12948500	1.8104
chr6	165419300	165419700	1.80936
chr14	55568800	55569200	1.80906
chr1	3098500	3098900	1.80813
chr21	44886400	44886800	1.80795
chr6	37598100	37598500	1.80788
chr12	105960900	105961300	1.80775
chr9	117821100	117821500	1.80677
chrX	129762400	129762800	1.80633
chr1	216383400	216383800	1.80522
chr8	119352100	119352500	1.80504
chr19	2186100	2186500	1.80503
chr10	133079200	133079600	1.80466
chr15	21174400	21174800	1.804
chr4	74570300	74570700	1.80356
chr21	45188000	45188400	1.80288
chr1	117533200	117533600	1.80281
chr17	49813400	49813800	1.80084
chr3	57858300	57858700	1.80036
chr11	73382700	73383100	1.80021
chr7	43244900	43245300	1.80008
chr12	126023000	126023400	1.79938
chr10	121095700	121096100	1.79931
chr5	75569200	75569600	1.79915
chr3	187528600	187529000	1.79859
chr17	19230300	19230700	1.79676
chr12	112613800	112614200	1.79651
chr3	71217100	71217500	1.79649
chr5	95244100	95244500	1.79534
chr5	43207800	43208200	1.7948
chr19	4649600	4650000	1.79463
chr13	27477600	27478000	1.79334
chr15	37438300	37438700	1.79304
chr4	136825300	136825700	1.7929
chr12	114734500	114734900	1.79239
chr19	51399900	51400300	1.79146
chr5	140900900	140901300	1.79108
chr18	71959800	71960200	1.79045
chr14	56442100	56442500	1.79045
chr17	9939900	9940300	1.79017
chr1	209420000	209420400	1.78953
chr14	94984200	94984600	1.78933
chr10	128947900	128948300	1.78908
chr2	151281000	151281400	1.78891
chr6	16724200	16724600	1.78876
chr11	70056300	70056700	1.78833
chr10	7763700	7764100	1.78813
chr20	42499100	42499500	1.78749
chr2	4275200	4275600	1.78688
chr18	34084800	34085200	1.7868
chr2	228045200	228045600	1.78674
chr5	176875000	176875400	1.78662
chr1	145988100	145988500	1.78644
chr2	28582100	28582500	1.78562
chr18	74826400	74826800	1.78359
chr11	115118000	115118400	1.78319
chr1	45738700	45739100	1.78309
chr4	109961500	109961900	1.7821
chr7	105872400	105872800	1.78192
chr10	29228800	29229200	1.78127
chr3	156195000	156195400	1.78077
chr7	158716200	158716600	1.78062
chr1	110661300	110661700	1.78023
chr14	100276600	100277000	1.77997
chr3	137457100	137457500	1.77947
chr8	128866500	128866900	1.77886
chr3	13427000	13427400	1.77813
chr12	28659200	28659600	1.77754
chr10	34994900	34995300	1.77616
chr10	52336300	52336700	1.77611
chr17	43158600	43159000	1.7761
chr6	36247200	36247600	1.7756
chr3	69281400	69281800	1.77537
chr14	75934300	75934700	1.77439
chrX	77990500	77990900	1.77392
chr17	51557800	51558200	1.77335
chr2	48776000	48776400	1.77231
chr17	70201400	70201800	1.77188
chr18	53919600	53920000	1.77181
chr1	34352200	34352600	1.77128
chr9	127235700	127236100	1.77102
chr4	1185800	1186200	1.77089
chrX	14981800	14982200	1.76997
chr15	100781600	100782000	1.76987
chr16	32612500	32612900	1.76974
chr7	63392400	63392800	1.76958
chr10	25781900	25782300	1.76952
chr17	76895600	76896000	1.76899
chr5	103819800	103820200	1.76871
chr9	72426200	72426600	1.7683
chr8	64183300	64183700	1.76771
chr13	81177800	81178200	1.7673
chr5	136627500	136627900	1.76671
chr11	125826400	125826800	1.76595
chr10	26587400	26587800	1.76585
chr10	131215400	131215800	1.76542
chr1	243787100	243787500	1.76538
chr14	39169000	39169400	1.76414
chr10	106608000	106608400	1.76366
chr9	87053400	87053800	1.76325
chr14	44786100	44786500	1.76289
chr2	235194700	235195100	1.76279
chr5	135372800	135373200	1.76271
chrX	39909500	39909900	1.76261
chr20	1125200	1125600	1.76243
chr16	88276200	88276600	1.76157
chr14	79438600	79439000	1.76155
chr6	154380600	154381000	1.76154
chr15	93571900	93572300	1.76041
chr2	136870000	136870400	1.76018
chr1	164740800	164741200	1.76008
chr14	54258000	54258400	1.76
chr3	54520500	54520900	1.75997
chr11	61729100	61729500	1.75867
chr7	147468500	147468900	1.75819
chr7	96975700	96976100	1.7581
chr1	56540200	56540600	1.75806
chr8	116319300	116319700	1.75765
chr7	128267200	128267600	1.75715
chr2	178709000	178709400	1.75695
chr4	1203400	1203800	1.75662
chr22	19579200	19579600	1.75634
chr14	44998200	44998600	1.75631
chr2	177359500	177359900	1.75627
chr22	49575500	49575900	1.7543
chr19	8420500	8420900	1.75416
chr2	28551000	28551400	1.75318
chr12	125294500	125294900	1.75314
chrX	39460700	39461100	1.75148
chr7	99161200	99161600	1.75146
chr8	140971000	140971400	1.75018
chr13	49245400	49245800	1.74987
chr11	132911900	132912300	1.74975
chr6	104448800	104449200	1.74954
chr7	38492100	38492500	1.74923
chr13	30716700	30717100	1.74898
chr20	40832800	40833200	1.74856
chr8	128235200	128235600	1.74745
chr20	15720600	15721000	1.74734
chr9	124930600	124931000	1.747
chr20	43574800	43575200	1.74661
chr4	102044200	102044600	1.74632
chr18	8632400	8632800	1.74602
chr4	145495500	145495900	1.74562
chr5	74959400	74959800	1.7453
chr4	143965800	143966200	1.7452
chr2	30038700	30039100	1.74486
chr6	39786500	39786900	1.74458
chr11	23248500	23248900	1.74429
chr22	23207100	23207500	1.74406
chr18	55287300	55287700	1.74351
chr9	3475200	3475600	1.74268
chr21	35906900	35907300	1.74266
chrX	134972100	134972500	1.74225
chr12	27820500	27820900	1.74164
chr1	26745300	26745700	1.74156
chr7	52411600	52412000	1.74133
chr4	184332600	184333000	1.74094
chr8	51990900	51991300	1.74065
chr3	132523400	132523800	1.74061
chr9	36543900	36544300	1.74032
chr15	79766500	79766900	1.73982
chr14	77647100	77647500	1.7393
chr9	35042000	35042400	1.73887
chr4	67880100	67880500	1.73866
chr13	70823500	70823900	1.73858
chr15	67413400	67413800	1.73827
chr17	15356500	15356900	1.73813
chr8	6456800	6457200	1.73764
chr9	95844100	95844500	1.73761
chr2	19547900	19548300	1.73735
chr6	108913500	108913900	1.7373
chr12	279700	280100	1.73708
chr7	57392200	57392600	1.73682
chr14	45263500	45263900	1.73673
chr3	126651200	126651600	1.73643
chr1	15198200	15198600	1.73596
chr2	190082600	190083000	1.73486
chr16	86568700	86569100	1.73479
chr4	165494100	165494500	1.7345
chr8	47332000	47332400	1.73396
chrX	80964000	80964400	1.73354
chr2	159710900	159711300	1.73344
chr11	36650200	36650600	1.73322
chr6	44751800	44752200	1.73314
chr21	15261700	15262100	1.7331
chr1	108471000	108471400	1.73176
chrX	113034300	113034700	1.73132
chr6	140474900	140475300	1.7313
chr12	65404300	65404700	1.7312
chr5	14947500	14947900	1.73077
chr5	151073500	151073900	1.73065
chr11	97917600	97918000	1.73043
chr5	176754900	176755300	1.73007
chr13	41713600	41714000	1.72984
chr7	95650900	95651300	1.72942
chr1	152512200	152512600	1.72942
chr12	109248100	109248500	1.72939
chr2	60210800	60211200	1.72857
chr2	19278700	19279100	1.72841
chrX	10502600	10503000	1.72777
chr2	172937100	172937500	1.7277
chr4	7863000	7863400	1.72753
chr1	33169200	33169600	1.72745
chr2	130989300	130989700	1.72717
chr5	156995700	156996100	1.72691
chr2	241190600	241191000	1.7268
chr14	41615500	41615900	1.72671
chr10	60723600	60724000	1.72637
chr11	36603100	36603500	1.72583
chr12	106541800	106542200	1.7246
chr16	88017400	88017800	1.72349
chr7	21842100	21842500	1.72298
chr16	24850200	24850600	1.72291
chr2	197875300	197875700	1.72258
chr5	77934200	77934600	1.722
chr22	46465800	46466200	1.72198
chr20	43230400	43230800	1.72187
chr2	107140500	107140900	1.72167
chr18	71615600	71616000	1.72058
chr8	141655800	141656200	1.7205
chr16	14380200	14380600	1.71909
chr20	51483800	51484200	1.71829
chr11	110056000	110056400	1.71818
chr2	135343900	135344300	1.71792
chrX	14694600	14695000	1.71729
chr11	107821800	107822200	1.71705
chr2	1618000	1618400	1.71647
chr11	105103500	105103900	1.71582
chr3	156174600	156175000	1.71517
chr3	75482000	75482400	1.71496
chr22	39704700	39705100	1.71485
chr19	57932000	57932400	1.71395
chr16	57770900	57771300	1.7135
chr1	31205500	31205900	1.71318
chr5	67730000	67730400	1.71297
chr18	76495500	76495900	1.71297
chrX	127911700	127912100	1.71269
chr6	2157900	2158300	1.71033
chr3	28628000	28628400	1.70989
chr2	127330300	127330700	1.70985
chrX	93020600	93021000	1.70929
chr10	95053900	95054300	1.70928
chr2	152793500	152793900	1.70878
chr3	5751500	5751900	1.70859
chr11	1739100	1739500	1.70853
chr11	72168500	72168900	1.70791
chr9	130467900	130468300	1.70776
chrX	6302300	6302700	1.70773
chr19	40541400	40541800	1.70732
chr14	91610900	91611300	1.70701
chr11	63771900	63772300	1.70638
chr13	92755900	92756300	1.70594
chr6	40317500	40317900	1.70553
chr20	17523900	17524300	1.70462
chr20	4425200	4425600	1.70453
chr4	132695600	132696000	1.70418
chr9	95969900	95970300	1.70396
chr13	27704700	27705100	1.70356
chr10	4680300	4680700	1.70334
chr20	46407200	46407600	1.70326
chr22	18455500	18455900	1.70232
chr2	13822900	13823300	1.70211
chr6	164431400	164431800	1.70193
chr5	33854800	33855200	1.70139
chr16	31848500	31848900	1.70117
chr1	45273300	45273700	1.70023
chr21	44153400	44153800	1.70018
chr7	101700	102100	1.69996
chr2	226644500	226644900	1.69977
chr7	85590800	85591200	1.69964
chr1	244318200	244318600	1.69913
chr13	112792500	112792900	1.69857
chr13	36491900	36492300	1.6985
chr10	79291300	79291700	1.69847
chr10	124256600	124257000	1.69835
chr2	117639600	117640000	1.69821
chr2	44495000	44495400	1.69788
chr2	234550800	234551200	1.69757
chr1	25890500	25890900	1.69739
chr22	43343100	43343500	1.69724
chr1	196070100	196070500	1.69651
chr2	69481000	69481400	1.69628
chr4	173890900	173891300	1.6962
chr7	93812700	93813100	1.69616
chr1	223486300	223486700	1.69598
chr22	23652700	23653100	1.69583
chr7	141763300	141763700	1.69518
chr4	10298300	10298700	1.69497
chr1	19701500	19701900	1.69377
chr2	202682500	202682900	1.69365
chr6	122363700	122364100	1.69267
chr6	107039400	107039800	1.69225
chr5	39196700	39197100	1.69224
chrX	40135600	40136000	1.69196
chr11	35188200	35188600	1.69178
chr4	79539500	79539900	1.69164
chr10	3149600	3150000	1.69155
chr5	179686000	179686400	1.69153
chr8	142534700	142535100	1.69137
chr5	152188500	152188900	1.69079
chr5	140677700	140678100	1.69067
chr1	2010600	2011000	1.69009
chr14	45809300	45809700	1.68968
chr21	28264600	28265000	1.68949
chr22	46850100	46850500	1.68947
chr10	106457800	106458200	1.6894
chr20	35035700	35036100	1.68938
chr10	129185300	129185700	1.68896
chr9	127105100	127105500	1.68894
chr15	67397800	67398200	1.68893
chr4	62376100	62376500	1.68875
chr16	26982600	26983000	1.68815
chr10	80734200	80734600	1.68815
chr1	147529800	147530200	1.68724
chr2	176919000	176919400	1.68636
chr15	52425300	52425700	1.68611
chr12	111267200	111267600	1.68599
chr7	51035400	51035800	1.68595
chr9	32172400	32172800	1.68547
chr11	12556700	12557100	1.68541
chr20	8570500	8570900	1.68509
chr8	103009200	103009600	1.68459
chr6	68905000	68905400	1.68384
chr12	115479600	115480000	1.68305
chr13	74530100	74530500	1.68259
chr7	148362400	148362800	1.68243
chr1	79603900	79604300	1.68232
chr20	49712700	49713100	1.68219
chr3	126783700	126784100	1.68161
chr1	6638000	6638400	1.6816
chr18	72201400	72201800	1.68157
chr8	142585800	142586200	1.68122
chr6	148032600	148033000	1.681
chr2	115932700	115933100	1.68087
chr4	23239300	23239700	1.68086
chr3	105676500	105676900	1.68072
chr7	156166900	156167300	1.68044
chr2	110014900	110015300	1.68031
chr7	50807500	50807900	1.68027
chr17	46080000	46080400	1.6796
chr21	33736700	33737100	1.67951
chr2	89285000	89285400	1.67924
chr15	89740900	89741300	1.67889
chr18	4869200	4869600	1.67884
chr10	52053300	52053700	1.67864
chr7	144839700	144840100	1.67858
chr11	102722000	102722400	1.6782
chr4	54452300	54452700	1.67768
chr3	130299900	130300300	1.67686
chr5	3737000	3737400	1.67678
chr13	48011400	48011800	1.6765
chr4	24771800	24772200	1.67622
chr17	30205300	30205700	1.675
chr18	10142100	10142500	1.67468
chr2	10988100	10988500	1.67451
chr4	8117700	8118100	1.6744
chr3	128287300	128287700	1.67404
chr11	93908600	93909000	1.67402
chr9	124881200	124881600	1.67398
chr6	11197200	11197600	1.67395
chr6	14249100	14249500	1.67389
chr3	126960700	126961100	1.67312
chr15	96775400	96775800	1.67257
chr7	47776300	47776700	1.67231
chr10	13261700	13262100	1.6712
chr2	160010600	160011000	1.67098
chr20	52565800	52566200	1.67
chr16	88884600	88885000	1.66969
chr21	18567900	18568300	1.66919
chr11	35358600	35359000	1.66864
chr7	40803200	40803600	1.66855
chr4	2094400	2094800	1.66848
chr6	13158900	13159300	1.66831
chr7	79538300	79538700	1.66829
chr5	96355300	96355700	1.66829
chr17	17645400	17645800	1.66779
chr21	38349700	38350100	1.66678
chr1	29830800	29831200	1.666
chr12	6339100	6339500	1.66563
chr17	1617900	1618300	1.66492
chr6	124811400	124811800	1.66416
chr10	96971500	96971900	1.66402
chr13	31842900	31843300	1.66353
chr2	174175100	174175500	1.66347
chr11	26967700	26968100	1.66325
chr22	24245100	24245500	1.66323
chr21	36208500	36208900	1.66216
chr1	225274800	225275200	1.66169
chr4	109788300	109788700	1.66167
chrX	43520900	43521300	1.66146
chr4	10008400	10008800	1.66143
chr2	28022100	28022500	1.66134
chr10	85392500	85392900	1.66129
chr5	134323400	134323800	1.66112
chr9	92747400	92747800	1.66043
chr13	110446400	110446800	1.65947
chr16	78698700	78699100	1.65896
chr3	15554200	15554600	1.65862
chr20	58327900	58328300	1.65848
chr8	141074000	141074400	1.65846
chr17	67866300	67866700	1.65836
chr7	105573100	105573500	1.65781
chr16	57711500	57711900	1.65758
chr8	909300	909700	1.65756
chr3	10805900	10806300	1.65752
chr9	38682600	38683000	1.65732
chr19	28565800	28566200	1.65707
chr18	25991800	25992200	1.65699
chr10	6180200	6180600	1.65665
chr7	157677100	157677500	1.65654
chr7	29579800	29580200	1.65644
chr6	73521700	73522100	1.65644
chr9	23342200	23342600	1.65594
chr3	37813000	37813400	1.65512
chr2	43115900	43116300	1.65455
chr10	73008800	73009200	1.65453
chr13	112011600	112012000	1.65416
chr5	163273400	163273800	1.65414
chr12	45992600	45993000	1.65414
chr6	113602200	113602600	1.65354
chr8	7251800	7252200	1.6535
chr12	741400	741800	1.65291
chr5	80543400	80543800	1.65277
chr9	140813300	140813700	1.65157
chr13	109833400	109833800	1.65155
chr8	36937300	36937700	1.65148
chr16	16951700	16952100	1.65132
chr1	22000100	22000500	1.65068
chr13	96449500	96449900	1.65058
chr19	6663700	6664100	1.65028
chr20	57950600	57951000	1.65005
chr14	86128500	86128900	1.64985
chr10	128275400	128275800	1.64978
chr8	23183500	23183900	1.64962
chr16	50736500	50736900	1.64928
chr21	18652900	18653300	1.64868
chr3	21368200	21368600	1.64809
chr14	78705100	78705500	1.64793
chr12	92172600	92173000	1.64789
chrX	11025300	11025700	1.6477
chr20	36031000	36031400	1.64636
chr22	47666300	47666700	1.64631
chr7	55247900	55248300	1.6463
chr1	92230600	92231000	1.64561
chr10	130871400	130871800	1.64546
chr1	27933800	27934200	1.64517
chr13	110123200	110123600	1.64479
chr16	9148400	9148800	1.64434
chr8	102088400	102088800	1.64431
chr3	79564300	79564700	1.6439
chr4	110299300	110299700	1.64382
chr16	10433700	10434100	1.64378
chr2	102049000	102049400	1.64346
chr15	98954000	98954400	1.64344
chr12	4140600	4141000	1.64269
chr6	142022000	142022400	1.64125
chrX	6087500	6087900	1.64107
chr13	107100800	107101200	1.64103
chr7	145327900	145328300	1.64096
chr20	49137500	49137900	1.6408
chr8	580800	581200	1.64043
chr14	51802300	51802700	1.64009
chr12	56268000	56268400	1.63995
chr13	94801200	94801600	1.63988
chr1	3195100	3195500	1.63987
chr16	21532700	21533100	1.63918
chr1	64504800	64505200	1.63869
chr15	39472700	39473100	1.63844
chr10	128567800	128568200	1.63842
chr9	130860900	130861300	1.63812
chr17	29923700	29924100	1.63771
chr6	28780200	28780600	1.63737
chr10	105459300	105459700	1.63733
chr14	67960900	67961300	1.6367
chr19	47686900	47687300	1.63618
chr2	235489900	235490300	1.63613
chr18	51580900	51581300	1.63604
chr20	60436400	60436800	1.6358
chr3	138079500	138079900	1.63543
chr16	73246600	73247000	1.63515
chr17	66631600	66632000	1.63495
chr5	116634100	116634500	1.63486
chr10	80732500	80732900	1.63481
chrX	39589100	39589500	1.63451
chr18	13565300	13565700	1.63446
chr17	56615900	56616300	1.63445
chr6	105876400	105876800	1.63444
chr5	5783200	5783600	1.63393
chr1	22188500	22188900	1.63376
chr3	66805200	66805600	1.63366
chr12	124515100	124515500	1.63351
chr17	43423400	43423800	1.6334
chr1	30340300	30340700	1.63312
chr1	108168100	108168500	1.63308
chr16	88820400	88820800	1.63293
chr8	111648000	111648400	1.63169
chr11	1520500	1520900	1.63143
chr15	85361800	85362200	1.63135
chr8	124046200	124046600	1.63132
chr6	170467600	170468000	1.63078
chr2	182931300	182931700	1.63072
chr2	181589600	181590000	1.63068
chr6	5962900	5963300	1.63054
chr1	235054200	235054600	1.63033
chr2	129877600	129878000	1.62964
chr17	74558000	74558400	1.62917
chr13	81452200	81452600	1.62916
chr11	44846000	44846400	1.62902
chr10	88349600	88350000	1.62851
chr9	82796200	82796600	1.62847
chr17	17255700	17256100	1.62846
chr5	93857600	93858000	1.62841
chr10	121795500	121795900	1.6281
chr2	145722700	145723100	1.6278
chr20	50082200	50082600	1.62754
chr7	158808200	158808600	1.62737
chr13	112800000	112800400	1.62686
chr2	227514800	227515200	1.62618
chr4	134993100	134993500	1.62589
chr16	86720700	86721100	1.62585
chr5	172392500	172392900	1.6257
chr14	75423500	75423900	1.62531
chr8	49502700	49503100	1.62514
chr8	87774300	87774700	1.62501
chr8	23310200	23310600	1.62494
chr10	34823200	34823600	1.62479
chr9	46034800	46035200	1.62449
chr6	148887400	148887800	1.62392
chr19	13962100	13962500	1.62388
chr12	96040700	96041100	1.62378
chr18	4544000	4544400	1.6237
chr3	71099900	71100300	1.62369
chr19	29054200	29054600	1.6236
chr12	109085500	109085900	1.62356
chr6	149284200	149284600	1.62355
chr7	158611100	158611500	1.62347
chr8	580000	580400	1.62346
chr2	20051700	20052100	1.62325
chr8	134297700	134298100	1.62271
chr5	138650800	138651200	1.62269
chr8	62658500	62658900	1.62268
chr3	56962600	56963000	1.62258
chr4	59357900	59358300	1.62235
chr13	19960100	19960500	1.62201
chr3	38409300	38409700	1.62176
chr4	2877300	2877700	1.62141
chr4	120589100	120589500	1.62067
chr7	113665800	113666200	1.62017
chr7	130844700	130845100	1.62007
chr2	130932500	130932900	1.62005
chr8	51836200	51836600	1.61982
chr5	72447800	72448200	1.61969
chr22	45327000	45327400	1.61944
chr14	27001100	27001500	1.61904
chr19	54068200	54068600	1.61879
chr11	71010400	71010800	1.61861
chr4	88674800	88675200	1.61856
chr2	105695200	105695600	1.61798
chr16	48899900	48900300	1.61757
chr9	899300	899700	1.61734
chr10	130005300	130005700	1.61673
chr9	130769800	130770200	1.61619
chr7	89325500	89325900	1.61599
chr1	183357800	183358200	1.61587
chr10	77307100	77307500	1.61576
chr22	45508100	45508500	1.61573
chr16	29280500	29280900	1.61554
chr14	56024000	56024400	1.61509
chr5	36079600	36080000	1.61494
chr21	31094200	31094600	1.61465
chr5	6084500	6084900	1.61453
chr5	89174000	89174400	1.61449
chr7	57609600	57610000	1.61447
chr6	163760100	163760500	1.61408
chr9	78745400	78745800	1.61405
chr1	31282500	31282900	1.61377
chr10	6075900	6076300	1.61367
chr13	68123600	68124000	1.61342
chr3	145622600	145623000	1.61254
chr7	154854300	154854700	1.61243
chr7	151442300	151442700	1.61218
chr9	95732700	95733100	1.61206
chr2	173223300	173223700	1.61195
chr15	100892000	100892400	1.61191
chr2	239600500	239600900	1.61186
chr1	80185200	80185600	1.61186
chr2	189143800	189144200	1.61158
chr8	119090800	119091200	1.61152
chr2	112311600	112312000	1.6112
chr3	125642100	125642500	1.61062
chr16	17499000	17499400	1.61048
chr10	98829700	98830100	1.61036
chr3	35363600	35364000	1.61034
chr2	84668200	84668600	1.61012
chr16	34701000	34701400	1.60973
chr16	63595200	63595600	1.60962
chr7	51682700	51683100	1.60959
chr1	160807600	160808000	1.60926
chr1	57903500	57903900	1.60922
chr3	168188300	168188700	1.60866
chr2	67788600	67789000	1.60854
chr17	67712700	67713100	1.6079
chr9	116967600	116968000	1.60766
chr15	101212000	101212400	1.60753
chr1	231275800	231276200	1.60748
chr3	129817700	129818100	1.60743
chrX	13416600	13417000	1.60714
chr16	78618800	78619200	1.60664
chr9	117274200	117274600	1.60651
chr6	148639000	148639400	1.60629
chr12	26472400	26472800	1.60613
chr8	115953300	115953700	1.60531
chr9	84108100	84108500	1.60521
chr10	125633800	125634200	1.60507
chr4	39506100	39506500	1.60486
chr15	42228900	42229300	1.60403
chr10	63546600	63547000	1.6038
chr21	31854600	31855000	1.6037
chr11	128778300	128778700	1.60344
chr13	44811500	44811900	1.60319
chr4	3642300	3642700	1.60271
chr2	240642800	240643200	1.60265
chr1	212643400	212643800	1.60249
chr19	42046700	42047100	1.60247
chr20	39590300	39590700	1.60241
chr7	112089000	112089400	1.6022
chr9	131171300	131171700	1.60204
chr7	158239800	158240200	1.6011
chr4	8193000	8193400	1.60105
chr8	130722900	130723300	1.601
chr3	98847800	98848200	1.60087
chr9	126231500	126231900	1.60064
chr2	127951600	127952000	1.60038
chr19	6057100	6057500	1.60032
chr17	6474100	6474500	1.60022
chr13	110034000	110034400	1.59943
chr9	122252500	122252900	1.59922
chr9	122824700	122825100	1.59912
chr12	66289900	66290300	1.59851
chr9	134508700	134509100	1.59815
chr14	71217800	71218200	1.59767
chr17	71783100	71783500	1.5976
chr4	133506200	133506600	1.59746
chr18	45530300	45530700	1.59735
chr21	42053700	42054100	1.59709
chr20	55884900	55885300	1.59558
chr1	245906300	245906700	1.59531
chr16	47990700	47991100	1.59524
chr9	128506900	128507300	1.59458
chr20	47379900	47380300	1.59445
chr12	65282800	65283200	1.59437
chr10	104409200	104409600	1.59424
chr18	74832300	74832700	1.59413
chr3	106945400	106945800	1.59345
chr6	148544500	148544900	1.5933
chrX	47308400	47308800	1.59301
chr12	10344400	10344800	1.59282
chr13	39531900	39532300	1.59264
chr10	31966400	31966800	1.59264
chr9	38644500	38644900	1.59236
chr11	2848700	2849100	1.59224
chrX	149694000	149694400	1.59222
chr10	105527600	105528000	1.59191
chr2	28947400	28947800	1.59159
chr14	52224500	52224900	1.59139
chr20	35457000	35457400	1.59118
chr2	89508000	89508400	1.59063
chr1	65383100	65383500	1.58959
chr18	77941700	77942100	1.58939
chr11	70346100	70346500	1.58923
chr5	146795300	146795700	1.58897
chr5	121304800	121305200	1.58884
chr1	222638900	222639300	1.58884
chr7	52821600	52822000	1.58828
chr17	57888000	57888400	1.58828
chr1	161964000	161964400	1.58761
chr9	139857900	139858300	1.58735
chr10	78538900	78539300	1.587
chr3	127410400	127410800	1.58698
chr4	15343400	15343800	1.58668
chr2	25241800	25242200	1.58651
chr17	74571700	74572100	1.58632
chr7	51701200	51701600	1.58609
chr10	3581200	3581600	1.58595
chr9	87654100	87654500	1.58577
chrX	20879100	20879500	1.58565
chr1	31870600	31871000	1.58562
chr21	46746000	46746400	1.58545
chr4	175325100	175325500	1.58511
chr11	88513000	88513400	1.5851
chr1	91811100	91811500	1.58487
chr13	109225100	109225500	1.58469
chr18	39910200	39910600	1.58463
chr6	8814800	8815200	1.58452
chr22	25192900	25193300	1.58443
chr2	51852000	51852400	1.58424
chr11	122037900	122038300	1.58411
chr16	77956200	77956600	1.58395
chr6	37483900	37484300	1.58389
chr8	143145200	143145600	1.58364
chr5	6223600	6224000	1.58315
chr3	8674200	8674600	1.58301
chr8	1603300	1603700	1.58257
chr6	36917400	36917800	1.58238
chr12	106468400	106468800	1.58204
chr10	79633200	79633600	1.58197
chr10	92502100	92502500	1.58187
chr9	133542400	133542800	1.5817
chr21	42721700	42722100	1.58166
chrX	91125200	91125600	1.58164
chr4	69019700	69020100	1.58143
chr16	50896000	50896400	1.58134
chr11	122699900	122700300	1.58133
chr6	149354100	149354500	1.58116
chr1	236073800	236074200	1.58114
chr2	95963700	95964100	1.58109
chr3	41317800	41318200	1.58105
chr9	136825500	136825900	1.58102
chr15	67706200	67706600	1.58047
chr15	66246600	66247000	1.58022
chr2	20821700	20822100	1.58008
chr4	119910300	119910700	1.57993
chr18	73770300	73770700	1.57981
chr10	61147500	61147900	1.57965
chr5	93651200	93651600	1.57933
chr6	156748600	156749000	1.57932
chr8	104192500	104192900	1.57929
chr7	116797600	116798000	1.57903
chr2	105993300	105993700	1.57903
chr1	70275300	70275700	1.579
chr13	75422200	75422600	1.57897
chr18	77672600	77673000	1.57795
chr4	129292300	129292700	1.57772
chr14	91905200	91905600	1.5776
chr4	5278300	5278700	1.5774
chr2	225832800	225833200	1.5772
chr4	33838500	33838900	1.57717
chr12	13880800	13881200	1.57683
chr2	40508300	40508700	1.57681
chr6	140991200	140991600	1.57673
chr4	184929100	184929500	1.57633
chr17	36946300	36946700	1.57631
chr20	48782700	48783100	1.57586
chr4	13893800	13894200	1.5757
chr6	87506300	87506700	1.57567
chr1	104472800	104473200	1.57528
chr3	123219900	123220300	1.57499
chr8	140562500	140562900	1.57453
chr1	9498600	9499000	1.57434
chr1	55075200	55075600	1.57367
chr9	86918500	86918900	1.57341
chr14	21637800	21638200	1.57326
chr9	89028700	89029100	1.57286
chr19	41827700	41828100	1.57285
chr13	82671200	82671600	1.5728
chr8	86201400	86201800	1.57261
chr4	89198300	89198700	1.57255
chr3	193216100	193216500	1.57243
chr2	43181700	43182100	1.57211
chr1	10725800	10726200	1.5715
chr20	61283800	61284200	1.57105
chr16	52775200	52775600	1.57102
chr15	22185600	22186000	1.571
chr12	123611000	123611400	1.57038
chr18	35056400	35056800	1.57014
chr2	31021400	31021800	1.57013
chr9	38017200	38017600	1.56997
chrX	20029300	20029700	1.56991
chr8	81800200	81800600	1.56986
chr10	105818200	105818600	1.56914
chr4	46311200	46311600	1.56885
chr6	160502400	160502800	1.56861
chrX	120394600	120395000	1.56856
chr10	12790100	12790500	1.56845
chr7	54876700	54877100	1.56839
chr21	43953000	43953400	1.56764
chr15	59586600	59587000	1.5676
chr3	15317500	15317900	1.56759
chr13	50790200	50790600	1.56654
chr7	5469000	5469400	1.56633
chr5	154508700	154509100	1.56583
chr2	227063700	227064100	1.56568
chr22	46238300	46238700	1.56554
chr5	154788200	154788600	1.56515
chr7	112477500	112477900	1.56514
chr22	41930200	41930600	1.56514
chr12	5839900	5840300	1.56478
chr20	36965800	36966200	1.56453
chr10	134954400	134954800	1.56411
chrX	11647500	11647900	1.5641
chr1	44955100	44955500	1.56399
chrX	17729300	17729700	1.56394
chr2	223379400	223379800	1.56371
chr7	73309500	73309900	1.56336
chr7	35949400	35949800	1.56322
chr12	24557500	24557900	1.56315
chr14	24482100	24482500	1.56308
chr3	193567600	193568000	1.56292
chr19	19534200	19534600	1.56292
chrX	82677800	82678200	1.56276
chr7	62809100	62809500	1.56261
chr16	85220700	85221100	1.56256
chrX	14045700	14046100	1.56232
chr16	29626000	29626400	1.56217
chr6	41933300	41933700	1.56212
chr11	132857800	132858200	1.56208
chr17	49689900	49690300	1.56201
chrX	98370600	98371000	1.56148
chr2	77856600	77857000	1.56145
chr6	168061200	168061600	1.5614
chr5	135201700	135202100	1.56064
chr10	114619000	114619400	1.55945
chr10	79826500	79826900	1.55938
chr2	16703500	16703900	1.55925
chr20	57120900	57121300	1.55918
chr10	110965600	110966000	1.55866
chr17	19011700	19012100	1.55865
chr20	59576500	59576900	1.55832
chr14	35834700	35835100	1.5582
chr15	25415100	25415500	1.55808
chr9	139917400	139917800	1.55798
chr2	75652300	75652700	1.55785
chr17	19137800	19138200	1.55773
chr1	79701700	79702100	1.5575
chr16	66919000	66919400	1.55717
chr12	75514800	75515200	1.55689
chr11	10602300	10602700	1.55688
chr17	54941300	54941700	1.55657
chr6	161404100	161404500	1.55645
chr5	112078100	112078500	1.5564
chr6	44802300	44802700	1.55638
chr6	169497300	169497700	1.55614
chr4	19268100	19268500	1.55565
chr15	26967600	26968000	1.5555
chr2	71823200	71823600	1.55515
chr5	25945700	25946100	1.5551
chr10	91846400	91846800	1.55507
chr1	236099200	236099600	1.55502
chr5	123337500	123337900	1.55499
chr7	72026800	72027200	1.55455
chr1	3248000	3248400	1.55445
chr21	40002900	40003300	1.55433
chr13	53883300	53883700	1.55419
chr2	7789700	7790100	1.55411
chr19	47114700	47115100	1.55403
chr2	173832900	173833300	1.55402
chr3	30188500	30188900	1.55364
chr2	84620100	84620500	1.55359
chr6	3082200	3082600	1.5535
chr11	69717800	69718200	1.55347
chr10	126315400	126315800	1.55347
chr13	95672700	95673100	1.55336
chr1	50722800	50723200	1.55329
chr5	4951500	4951900	1.55307
chr5	149696700	149697100	1.55301
chr11	12204600	12205000	1.55301
chr6	147040500	147040900	1.55282
chr1	235098800	235099200	1.5527
chr5	81278300	81278700	1.55235
chr14	70512000	70512400	1.55217
chr20	40018500	40018900	1.55215
chr8	67406500	67406900	1.55175
chr10	113716700	113717100	1.55161
chr5	3481200	3481600	1.55144
chr6	164940500	164940900	1.55039
chr16	10965000	10965400	1.55038
chr6	170749000	170749400	1.55034
chr3	43104000	43104400	1.5502
chr17	25703500	25703900	1.54958
chr3	68016500	68016900	1.54953
chr5	23383600	23384000	1.54906
chr20	46911700	46912100	1.54811
chr6	70501400	70501800	1.54768
chr7	142170200	142170600	1.54766
chr12	111495600	111496000	1.54709
chr10	82927700	82928100	1.54698
chr7	37221000	37221400	1.5466
chr4	3474700	3475100	1.54641
chr4	170726800	170727200	1.5464
chr3	19515900	19516300	1.54615
chr6	153115900	153116300	1.54605
chr8	74115100	74115500	1.54595
chr12	70822800	70823200	1.54573
chr15	28343800	28344200	1.54548
chr12	67334800	67335200	1.54504
chr14	50442100	50442500	1.54419
chr10	45596300	45596700	1.54407
chr4	16599600	16600000	1.54404
chr1	117281300	117281700	1.54397
chr2	240046000	240046400	1.54389
chr13	70491600	70492000	1.54366
chr15	92689800	92690200	1.54345
chr12	131627800	131628200	1.54286
chr10	79006800	79007200	1.5427
chr2	208182800	208183200	1.5426
chr9	7694600	7695000	1.54256
chr14	91626200	91626600	1.54247
chrX	62747300	62747700	1.54208
chr8	49492800	49493200	1.54205
chr1	17454800	17455200	1.54199
chr21	37469200	37469600	1.54166
chr15	70041100	70041500	1.54133
chrX	130849600	130850000	1.54086
chr3	42998300	42998700	1.54075
chr1	15236500	15236900	1.54025
chr3	158427400	158427800	1.54012
chr7	6976300	6976700	1.54009
chr19	12126600	12127000	1.53999
chr11	94082400	94082800	1.53969
chr12	130315800	130316200	1.53965
chr3	31392100	31392500	1.53926
chr5	144541200	144541600	1.53895
chrX	125017000	125017400	1.5389
chr1	106955800	106956200	1.53835
chr6	1746400	1746800	1.53811
chr8	27107500	27107900	1.53797
chr8	40467900	40468300	1.53794
chr5	56834000	56834400	1.53751
chr3	25277600	25278000	1.53705
chr6	133713700	133714100	1.53699
chr5	30995000	30995400	1.53651
chr22	36747100	36747500	1.53539
chr5	4219100	4219500	1.53531
chr4	55339400	55339800	1.53526
chr8	136072200	136072600	1.53519
chr6	109266600	109267000	1.53503
chr6	85479700	85480100	1.53476
chr1	201093200	201093600	1.53476
chr10	72852600	72853000	1.53472
chr3	15676800	15677200	1.53451
chr9	13254800	13255200	1.53397
chr7	79125100	79125500	1.5335
chr10	30167100	30167500	1.53325
chr13	33712500	33712900	1.53318
chr4	98347800	98348200	1.53298
chr20	59087400	59087800	1.53233
chr4	7360100	7360500	1.53209
chr22	47402500	47402900	1.53151
chr3	171287500	171287900	1.53127
chr16	62293000	62293400	1.53124
chr5	173714800	173715200	1.53062
chr16	55122300	55122700	1.53051
chr7	153216500	153216900	1.53024
chr12	123429100	123429500	1.53021
chr13	42013700	42014100	1.52938
chr22	17965300	17965700	1.52936
chrX	106186700	106187100	1.52916
chr9	108650000	108650400	1.52894
chr4	190123900	190124300	1.52894
chr12	25711400	25711800	1.52878
chr3	149950800	149951200	1.5282
chr12	71258000	71258400	1.528
chr20	54243700	54244100	1.52796
chr1	917500	917900	1.5279
chr7	8144200	8144600	1.52755
chr4	174142900	174143300	1.52753
chr11	63861900	63862300	1.52718
chr4	2414800	2415200	1.52712
chr10	32366700	32367100	1.5267
chr11	127521200	127521600	1.52669
chrX	48792400	48792800	1.52665
chr7	133272800	133273200	1.5265
chr21	46309300	46309700	1.52638
chr17	75474300	75474700	1.52627
chr3	131523600	131524000	1.52579
chr7	90419400	90419800	1.52565
chr21	43091800	43092200	1.52562
chr1	178313900	178314300	1.52557
chr2	348500	348900	1.52554
chr14	89068500	89068900	1.5255
chr5	64423900	64424300	1.52547
chr9	7907100	7907500	1.5254
chr6	54845900	54846300	1.52532
chr7	5475100	5475500	1.5251
chr6	43908800	43909200	1.52491
chr8	99449700	99450100	1.52487
chr12	121377500	121377900	1.52442
chr13	98696700	98697100	1.52337
chr8	83048600	83049000	1.52281
chr5	157991100	157991500	1.52279
chr6	39399100	39399500	1.52227
chr16	2962500	2962900	1.52216
chr3	14646900	14647300	1.52215
chr5	86737800	86738200	1.5219
chr3	69834000	69834400	1.52189
chr1	2793300	2793700	1.5218
chr3	161067600	161068000	1.52163
chr10	14106100	14106500	1.5216
chr1	199645600	199646000	1.52139
chr4	786700	787100	1.52121
chr16	88142300	88142700	1.52119
chr13	59916600	59917000	1.52098
chr8	19231300	19231700	1.52074
chr1	6063800	6064200	1.52064
chr14	63174400	63174800	1.5206
chr7	158368900	158369300	1.52051
chr12	32715000	32715400	1.5205
chr11	111047400	111047800	1.52036
chr3	55876100	55876500	1.52005
chrX	146929700	146930100	1.51976
chr2	102954000	102954400	1.51887
chr5	124820900	124821300	1.51827
chrX	142329700	142330100	1.51804
chr1	233855900	233856300	1.518
chr17	34979200	34979600	1.51785
chr1	178928800	178929200	1.51776
chr2	111449200	111449600	1.5175
chr2	101741700	101742100	1.5175
chr19	51736000	51736400	1.51748
chr19	50720500	50720900	1.51699
chr14	96415000	96415400	1.51655
chr6	12786300	12786700	1.51641
chr13	76457300	76457700	1.51628
chr20	24216100	24216500	1.51624
chr9	27094700	27095100	1.51589
chr5	128150700	128151100	1.51523
chrX	130575100	130575500	1.51521
chr14	101161500	101161900	1.51516
chr3	193601400	193601800	1.51506
chr11	101312900	101313300	1.51477
chr2	224590100	224590500	1.51474
chr19	23730700	23731100	1.5147
chr4	6058500	6058900	1.51458
chrX	91189100	91189500	1.51426
chr2	230487200	230487600	1.51422
chr22	37418400	37418800	1.51356
chr5	1416700	1417100	1.51266
chr2	96191300	96191700	1.5123
chr6	169702300	169702700	1.51217
chr18	78007200	78007600	1.51211
chr3	166220200	166220600	1.51195
chr21	38664300	38664700	1.5119
chr20	21164000	21164400	1.51168
chr2	147658400	147658800	1.51165
chr20	31060900	31061300	1.51137
chr15	66872900	66873300	1.51136
chr5	5366700	5367100	1.51131
chr2	127415600	127416000	1.51114
chr6	122773800	122774200	1.51111
chr16	59782300	59782700	1.51086
chr18	64561900	64562300	1.51084
chr16	85070800	85071200	1.51063
chr20	56042800	56043200	1.51053
chr7	151585900	151586300	1.51041
chr19	48186100	48186500	1.51034
chr9	108197600	108198000	1.51026
chr12	125318500	125318900	1.50979
chr14	101961500	101961900	1.50928
chr20	9006300	9006700	1.50913
chr15	70995600	70996000	1.509
chr9	2925300	2925700	1.50897
chr13	113492600	113493000	1.50897
chr12	93357700	93358100	1.50886
chr10	11916800	11917200	1.50846
chr11	46797500	46797900	1.50839
chr10	102087300	102087700	1.50838
chr14	79602900	79603300	1.50818
chr16	53424400	53424800	1.50801
chr6	21711200	21711600	1.50757
chr16	7345800	7346200	1.5071
chr13	96193200	96193600	1.5067
chr22	45851100	45851500	1.5066
chr7	61284600	61285000	1.50655
chr2	96023200	96023600	1.50653
chr1	121116800	121117200	1.50641
chr12	90365500	90365900	1.50629
chr10	100179300	100179700	1.50621
chr3	38400400	38400800	1.50607
chr11	11663000	11663400	1.50598
chr10	672500	672900	1.50595
chr12	799600	800000	1.50573
chr5	27141100	27141500	1.50569
chr14	47904800	47905200	1.50555
chr5	46004200	46004600	1.50528
chr12	22768800	22769200	1.50521
chr12	92976700	92977100	1.50515
chr3	53303900	53304300	1.50474
chr10	55394400	55394800	1.50467
chr6	155231000	155231400	1.50466
chr4	36055400	36055800	1.50455
chr18	57115700	57116100	1.50448
chr6	11354100	11354500	1.50447
chrX	19700500	19700900	1.50443
chr5	150510200	150510600	1.50415
chr12	128044100	128044500	1.50413
chr3	118761800	118762200	1.50394
chr10	44954500	44954900	1.50381
chr3	133606900	133607300	1.50378
chr2	219559100	219559500	1.50365
chr11	45353600	45354000	1.50364
chr10	58597800	58598200	1.50305
chr2	24113300	24113700	1.50283
chr11	61457200	61457600	1.50272
chr11	112636300	112636700	1.50247
chr2	114766400	114766800	1.50218
chr6	148262400	148262800	1.50176
chr12	76144800	76145200	1.50154
chr13	53803200	53803600	1.50152
chr4	146239200	146239600	1.50125
chr14	23868700	23869100	1.50098
chr2	239069300	239069700	1.50057
chr4	7268300	7268700	1.50009
chr16	54100200	54100600	1.49997
chr12	131973700	131974100	1.49976
chr19	13355700	13356100	1.49956
chr16	12499900	12500300	1.49946
chr2	87534300	87534700	1.49928
chr7	94306600	94307000	1.4992
chr4	83435700	83436100	1.49859
chr1	9826700	9827100	1.49855
chr8	137315300	137315700	1.49837
chr1	70928200	70928600	1.49823
chr9	33101500	33101900	1.49819
chr1	38551600	38552000	1.49807
chr8	37578200	37578600	1.49768
chr15	74249100	74249500	1.49765
chr5	158919800	158920200	1.49756
chr5	149265700	149266100	1.49724
chr5	90632500	90632900	1.49712
chr7	27903500	27903900	1.4971
chr17	10173500	10173900	1.49664
chr21	23350200	23350600	1.49636
chr18	71974900	71975300	1.49626
chr11	113202900	113203300	1.49609
chr13	37928000	37928400	1.49608
chr6	70049100	70049500	1.49605
chr10	97666800	97667200	1.49584
chr2	12443500	12443900	1.49559
chr16	88459400	88459800	1.49547
chr5	102808600	102809000	1.49531
chr9	92495000	92495400	1.49522
chr2	3079900	3080300	1.49494
chr7	69922700	69923100	1.49492
chrX	23825500	23825900	1.49491
chr12	58923200	58923600	1.49484
chr17	58247200	58247600	1.49478
chr20	11973100	11973500	1.4947
chr12	14930100	14930500	1.49467
chr7	39264300	39264700	1.4946
chr7	31716200	31716600	1.49428
chr20	52847700	52848100	1.49356
chr5	16807700	16808100	1.49349
chr15	79644600	79645000	1.49322
chr7	17813800	17814200	1.49319
chr1	120129900	120130300	1.4929
chr3	58006200	58006600	1.49261
chr15	80538800	80539200	1.4924
chr8	119208000	119208400	1.49234
chr1	87620100	87620500	1.49202
chr4	152660600	152661000	1.49193
chr7	10123300	10123700	1.49161
chr16	64960300	64960700	1.49138
chr13	30499700	30500100	1.49128
chr21	48041400	48041800	1.49127
chr11	72430000	72430400	1.49117
chr2	239851200	239851600	1.49092
chr4	132325300	132325700	1.49079
chr2	235308500	235308900	1.49078
chr8	49181800	49182200	1.49077
chr8	26612700	26613100	1.49073
chr10	4726700	4727100	1.49066
chr5	85146200	85146600	1.49047
chr13	53666900	53667300	1.49044
chr2	114041500	114041900	1.49041
chr12	116807800	116808200	1.49038
chr10	123681000	123681400	1.48993
chr20	58829900	58830300	1.48977
chr10	99681400	99681800	1.48977
chr12	58247600	58248000	1.48955
chr4	91869800	91870200	1.4891
chr18	34162900	34163300	1.48899
chr2	80059700	80060100	1.48888
chr3	127201600	127202000	1.48875
chr3	172035700	172036100	1.4886
chr6	96061100	96061500	1.48853
chr9	91241700	91242100	1.48822
chr21	45790300	45790700	1.48801
chr17	46659700	46660100	1.48766
chr3	141648300	141648700	1.48758
chr1	156812600	156813000	1.48752
chr18	41089200	41089600	1.48727
chr2	241135600	241136000	1.48708
chrX	89760200	89760600	1.48695
chr11	33712200	33712600	1.48694
chr11	121102200	121102600	1.48674
chrX	129599400	129599800	1.48651
chr11	71331900	71332300	1.48632
chr7	147673400	147673800	1.48615
chr15	70316200	70316600	1.48597
chr6	40552900	40553300	1.4854
chr1	119905200	119905600	1.48522
chr10	130694800	130695200	1.4852
chr21	19231000	19231400	1.48456
chr7	132738200	132738600	1.48453
chr4	6327100	6327500	1.48441
chrX	15123800	15124200	1.48425
chr3	172609900	172610300	1.48423
chr9	126817000	126817400	1.48416
chr4	150908500	150908900	1.48395
chr8	24064800	24065200	1.48394
chr20	23116300	23116700	1.4839
chr18	21645800	21646200	1.48385
chr9	138405300	138405700	1.48383
chr14	92915800	92916200	1.48378
chr6	14735000	14735400	1.4835
chr21	27761000	27761400	1.48278
chr12	8388300	8388700	1.48261
chr12	38543200	38543600	1.4825
chr16	58826500	58826900	1.48239
chr12	13288600	13289000	1.48222
chr8	99913900	99914300	1.48175
chr1	181333200	181333600	1.48167
chr2	55970700	55971100	1.48166
chr20	24443200	24443600	1.48129
chr1	61389400	61389800	1.4812
chr12	69861200	69861600	1.48105
chr9	28410300	28410700	1.48085
chr13	27653700	27654100	1.48068
chr7	48707100	48707500	1.48027
chrX	1013000	1013400	1.47998
chr5	73871600	73872000	1.47974
chr10	110741600	110742000	1.47959
chr13	89585000	89585400	1.47881
chr5	56993700	56994100	1.47841
chr2	127512800	127513200	1.47825
chr16	83885300	83885700	1.47818
chr11	1662400	1662800	1.47751
chr10	7018500	7018900	1.47735
chr2	133235400	133235800	1.47732
chr21	38711000	38711400	1.47718
chr12	72650100	72650500	1.47713
chr16	17683800	17684200	1.47699
chr11	8696600	8697000	1.47661
chr1	206567000	206567400	1.47653
chr11	69311900	69312300	1.47614
chr8	94837300	94837700	1.47602
chr6	155405700	155406100	1.47581
chr7	468400	468800	1.47569
chr2	95960000	95960400	1.47528
chr12	124983100	124983500	1.47498
chr9	110397500	110397900	1.47491
chr1	160094500	160094900	1.47471
chr6	113602700	113603100	1.47449
chr2	46776500	46776900	1.47432
chr4	22364600	22365000	1.4743
chr10	23572900	23573300	1.47422
chr10	134801700	134802100	1.47371
chr3	86158000	86158400	1.47341
chr9	93317200	93317600	1.47334
chr5	3346600	3347000	1.47308
chr6	150584300	150584700	1.47298
chr12	8831200	8831600	1.47278
chr21	44579400	44579800	1.4727
chr20	61687400	61687800	1.47256
chr19	19870000	19870400	1.47243
chrX	153533100	153533500	1.47242
chr4	18392400	18392800	1.47198
chr18	8425300	8425700	1.47192
chr10	126145300	126145700	1.47181
chr15	93711400	93711800	1.47162
chr2	101101800	101102200	1.4715
chr5	21152700	21153100	1.4714
chrX	67640600	67641000	1.47129
[truncated: 5,976 more rows]

## Sheet: S10. Predicitive 6-mers
6-mer	reverse_compliment	SVM_weight
[truncated: 2,080 more rows]
