# Supplementary figures and images for: Integration of ChIP-seq and machine learning reveals enhancers and a predictive regulatory sequence vocabulary in melanocytes
Source: HighWire-hosted journal article supplement (doi:10.1101/gr.139360.112), 2012-09-27

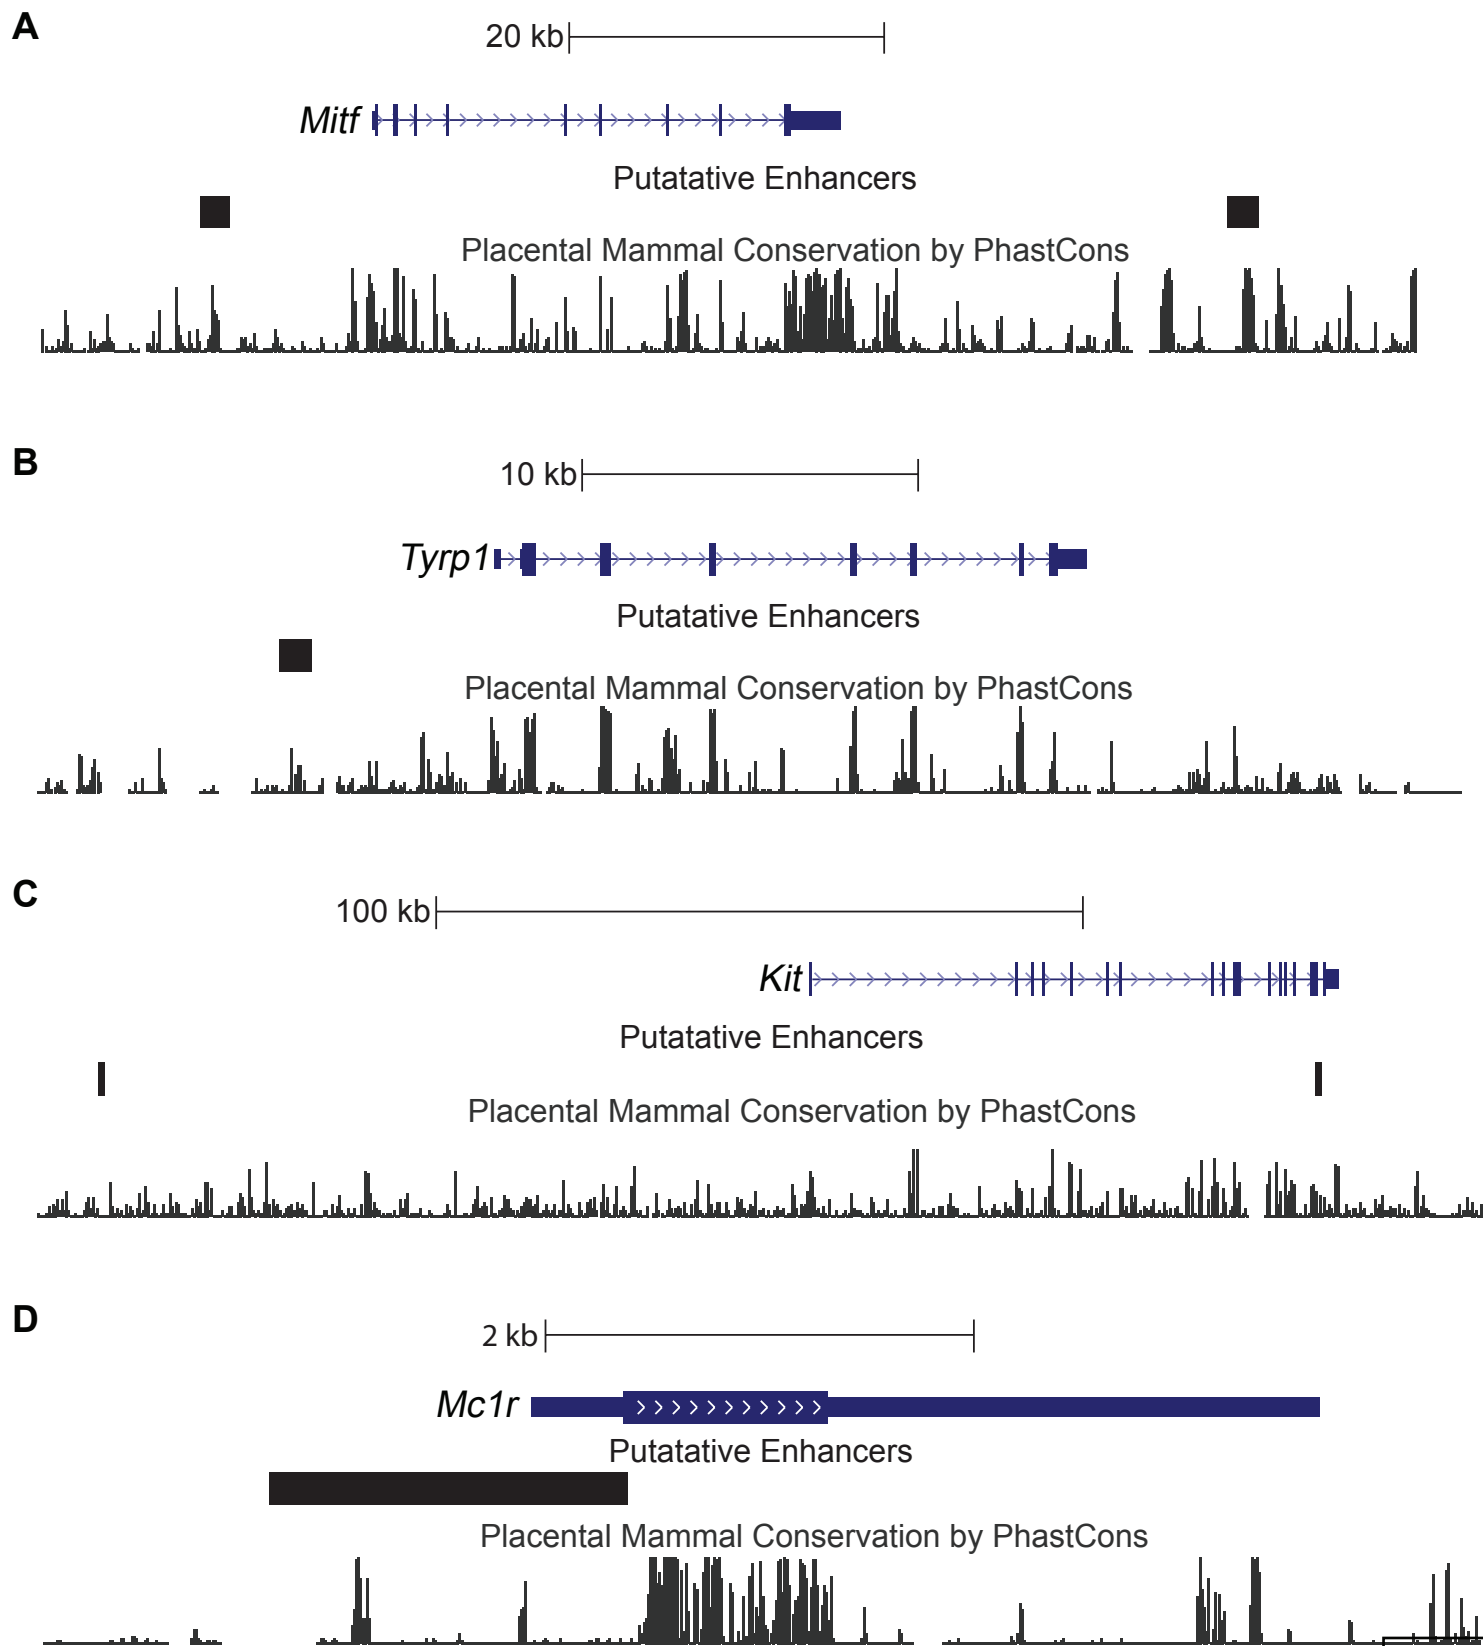

Figure S2

Supplement: FigS2_HR.pdf [file FigS2_HR.pdf]

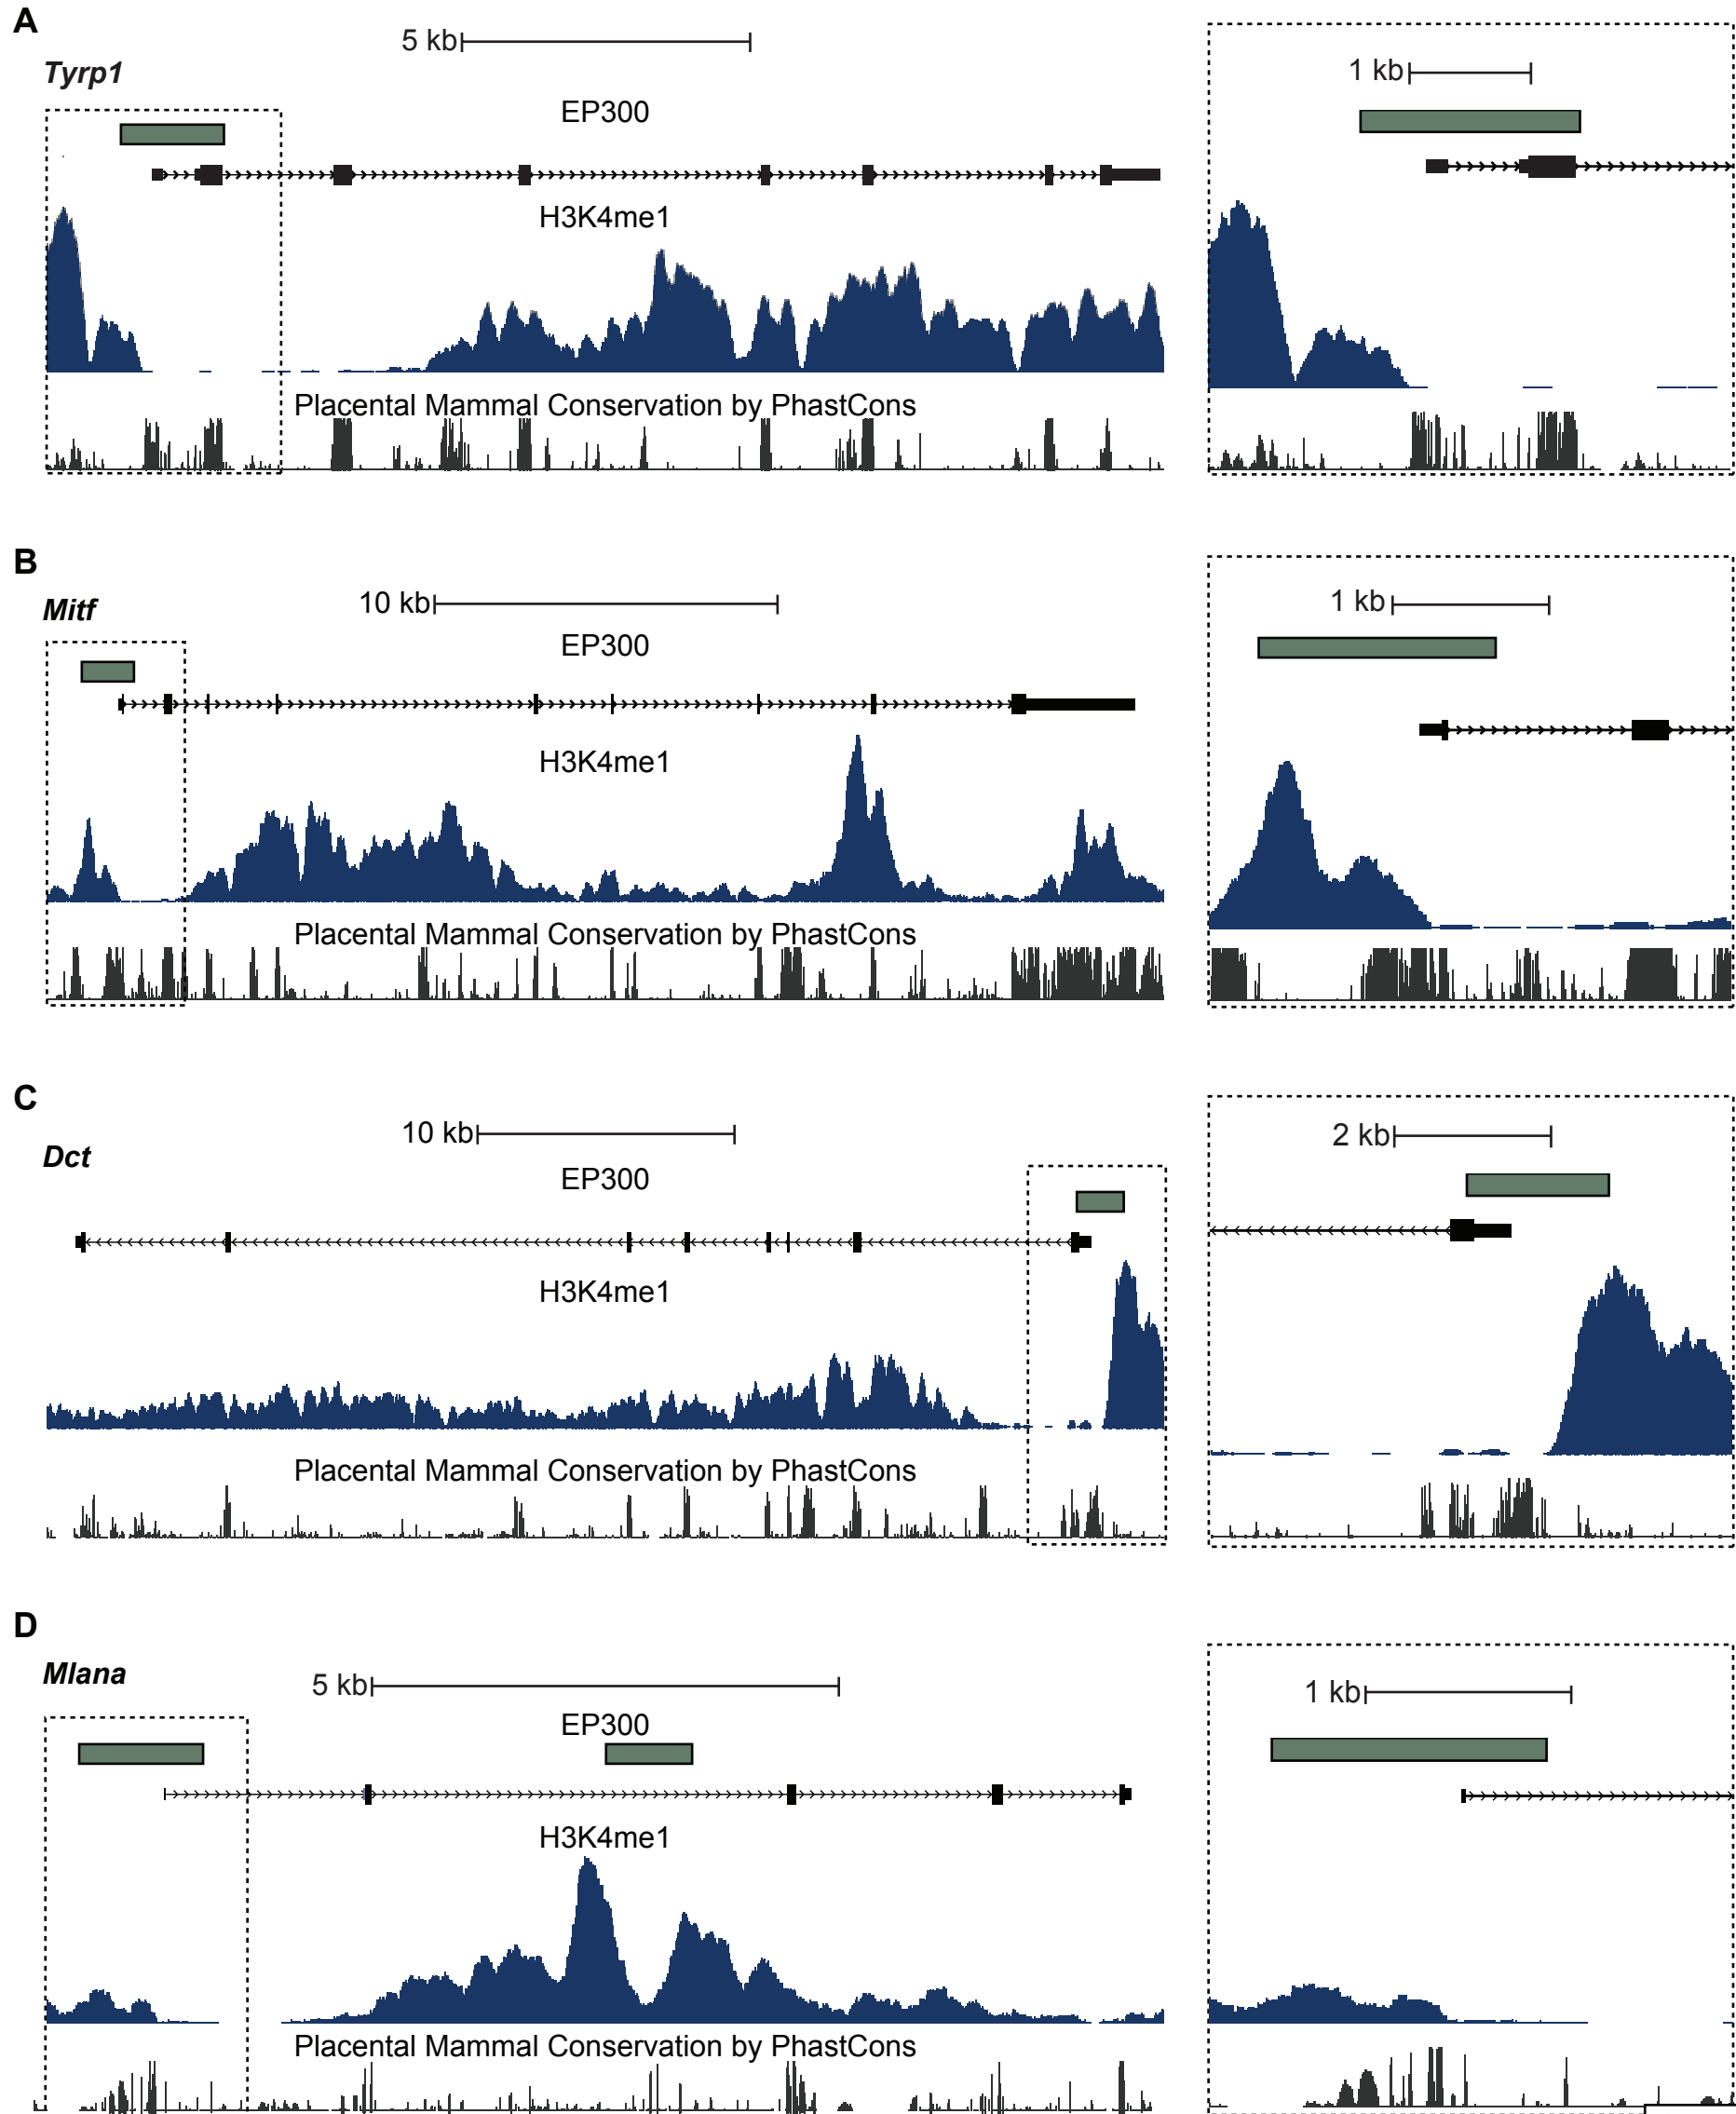

Supplement: FigS3_HR.pdf [file FigS3_HR.pdf]
